# Supplementary material for: A cross-tissue transcriptomic approach decodes glucocorticoid receptor-dependent links to human metabolic phenotypes
Source: Research Square preprint supplement (doi:10.21203/rs.3.rs-6147414/v1), 2025-04-18
Supplement: Supplementary file 1 [file 20b7a15be8c37ffd18d56f42.xlsx]

## Sheet: A
Term	Overlap	P-value	Adjusted P-value	Old P-value	Old Adjusted P-value	Odds Ratio	Combined Score	Genes
nifuroxazide MCF7 UP	mar.31	2.81e-07	9.91e-05	0	0	356.482	5376.97	OSGIN1;CHAC1;INHBE
thiostrepton MCF7 UP	mar.64	2.59e-06	0.000456	0	0	163.361	2101.5	OSGIN1;CHAC1;INHBE
5224221 MCF7 UP	mar.96	8.82e-06	0.00103436	0	0	106.978	1245.12	OSGIN1;CHAC1;INHBE
15-delta prostaglandin J2 MCF7 UP	3/122	1.81e-05	0.00159364	0	0	83.4958	911.697	OSGIN1;CHAC1;INHBE
clotrimazole MCF7 UP	lut.21	3.76e-05	0.002428	0	0	300.331	3059.66	CHAC1;INHBE
ticlopidine MCF7 UP	lut.22	4.14e-05	0.002428	0	0	285.3	2879.41	CHAC1;INHBE
mometasone MCF7 UP	lut.27	6.28e-05	0.00315858	0	0	228.183	2207.75	CHAC1;INHBE
dequalinium chloride MCF7 UP	lut.30	7.78e-05	0.00325154	0	0	203.704	1927.34	CHAC1;INHBE
methylbenzethonium chloride MCF7 UP	lut.31	8.31e-05	0.00325154	0	0	196.67	1847.72	CHAC1;INHBE
celastrol MCF7 UP	3/229	0.000118	0.00372147	0	0	43.7279	395.41	OSGIN1;CHAC1;INHBE
ivermectin MCF7 UP	lut.37	0.000119	0.00372147	0	0	162.906	1472.21	CHAC1;INHBE
F0447-0125 PC3 UP	lut.41	0.000146	0.00372147	0	0	146.168	1290.68	OSGIN1;CHAC1
benzethonium chloride MCF7 UP	lut.43	0.000161	0.00372147	0	0	139.024	1214.26	CHAC1;INHBE
5182598 MCF7 UP	lut.43	0.000161	0.00372147	0	0	139.024	1214.26	OSGIN1;CHAC1
ionomycin MCF7 UP	lut.45	0.000176	0.00372147	0	0	132.545	1145.54	CHAC1;INHBE
semustine PC3 UP	lut.45	0.000176	0.00372147	0	0	132.545	1145.54	OSGIN1;CHAC1
MG-132 MCF7 UP	3/270	0.000192	0.00372147	0	0	36.9363	316.016	OSGIN1;CHAC1;INHBE
syrosingopine MCF7 UP	lut.48	0.000201	0.00372147	0	0	123.882	1054.59	CHAC1;INHBE
gossypol MCF7 UP	lut.48	0.000201	0.00372147	0	0	123.882	1054.59	CHAC1;INHBE
pararosaniline MCF7 UP	lut.52	0.000236	0.00415209	0	0	113.949	951.703	CHAC1;INHBE
5707885 MCF7 UP	lut.56	0.000274	0.00458828	0	0	105.487	865.346	CHAC1;INHBE
MG-262 MCF7 UP	3/312	0.000295	0.00471323	0	0	31.8479	258.922	OSGIN1;CHAC1;INHBE
F0447-0125 MCF7 UP	lut.61	0.000325	0.00497239	0	0	96.523	775.272	OSGIN1;CHAC1
ciclosporin MCF7 UP	lut.65	0.000369	0.00519469	0	0	90.3764	714.414	CHAC1;INHBE
15-delta prostaglandin J2 PC3 UP	lut.65	0.000369	0.00519469	0	0	90.3764	714.414	OSGIN1;CHAC1
lomustine MCF7 UP	lut.68	0.000404	0.00546655	0	0	86.2554	674.055	OSGIN1;CHAC1
gossypol HL60 UP	lut.72	0.000453	0.00590098	0	0	81.3102	626.124	CHAC1;INHBE
withaferin A MCF7 UP	lut.76	0.000504	0.00633883	0	0	76.8996	583.859	OSGIN1;CHAC1
valinomycin MCF7 UP	lut.94	0.00077	0.00922776	0	0	61.7981	443.032	CHAC1;INHBE
valinomycin PC3 UP	lut.95	0.000786	0.00922776	0	0	61.1306	436.96	CHAC1;INHBE
alexidine MCF7 UP	lut.99	0.000854	0.00957954	0	0	58.5979	414.052	CHAC1;INHBE
alexidine HL60 UP	2/100	0.000871	0.00957954	0	0	57.9971	408.649	CHAC1;INHBE
azacitidine MCF7 UP	2/103	0.000924	0.00985096	0	0	56.2659	393.147	CHAC1;INHBE
niclosamide MCF7 UP	2/123	0.00131295	0.0135929	0	0	46.9185	311.327	CHAC1;INHBE
azacyclonol MCF7 UP	2/126	0.00137708	0.0138495	0	0	45.7765	301.566	CHAC1;INHBE
Bisphenol A CTD 00000312	4/1262	0.00153784	0.0150366	0	0	11.9129	77.1642	MEF2C;OSGIN1;CHAC1;INHBE
mefloquine MCF7 UP	2/143	0.0017684	0.0168237	0	0	40.2229	254.92	CHAC1;INHBE
prenylamine MCF7 UP	2/145	0.00181754	0.0168361	0	0	39.6563	250.242	CHAC1;INHBE
lomustine PC3 UP	2/149	0.00191777	0.0173091	0	0	38.5695	241.314	OSGIN1;CHAC1
635-65-4 CTD 00005510	2/151	0.00196885	0.0173259	0	0	38.0479	237.05	OSGIN1;CHAC1
amiodarone CTD 00005381	3/625	0.00221581	0.0190236	0	0	15.5699	95.1656	MEF2C;CHAC1;INHBE
pyrvinium MCF7 UP	2/170	0.00248629	0.0205862	0	0	33.7126	202.173	CHAC1;INHBE
5109870 MCF7 UP	2/171	0.00251513	0.0205862	0	0	33.5114	200.58	CHAC1;INHBE
astemizole MCF7 UP	2/173	0.00257328	0.0205862	0	0	33.1161	197.457	CHAC1;INHBE
calmidazolium MCF7 UP	2/182	0.00284282	0.0217525	0	0	31.446	184.367	CHAC1;INHBE
5,6-BENZOFLAVONE CTD 00007276	2/182	0.00284282	0.0217525	0	0	31.446	184.367	OSGIN1;INHBE
terfenadine MCF7 UP	2/184	0.00290446	0.0217525	0	0	31.0973	181.655	CHAC1;INHBE
phenoxybenzamine MCF7 UP	2/191	0.00312516	0.0229179	0	0	29.935	172.673	OSGIN1;CHAC1
co-dergocrine mesilate HL60 DOWN	2/203	0.0035214	0.0252966	0	0	28.1308	158.908	CHAC1;INHBE
piperlongumine MCF7 UP	2/216	0.00397595	0.0279907	0	0	26.4045	145.951	OSGIN1;CHAC1
parthenolide MCF7 UP	2/223	0.00423151	0.0292057	0	0	25.5591	139.686	OSGIN1;CHAC1
Prestwick-983 HL60 DOWN	2/236	0.00472605	0.0319917	0	0	24.1233	129.172	CHAC1;INHBE
8-HYDROXYQUINOLINE CTD 00007045	2/239	0.00484382	0.0321703	0	0	23.8143	126.932	OSGIN1;INHBE
puromycin MCF7 UP	2/242	0.00496297	0.0323512	0	0	23.5131	124.755	CHAC1;INHBE
quinpirole HL60 DOWN	2/245	0.00508347	0.0325342	0	0	23.2193	122.639	CHAC1;INHBE
puromycin HL60 UP	2/274	0.0063179	0.0383431	0	0	20.7132	104.899	MEF2C;INHBE
sanguinarine HL60 UP	2/384	0.0121064	0.0526103	0	0	14.6664	64.7379	CHAC1;INHBE
thapsigargin MCF7 UP	2/407	0.013529	0.053508	0	0	13.8173	59.4547	CHAC1;INHBE
ETHYL METHANESULFONATE CTD 00005938	kwi.15	0.0139536	0.0539743	0	0	6.12029	26.146	GBP6;MEF2C;CHAC1;INHBE
Zoledronic acid CTD 00003127	2/425	0.0146916	0.0559493	0	0	13.2172	55.7827	CHAC1;INHBE
8-azaguanine HL60 UP	2/428	0.0148896	0.0559493	0	0	13.1221	55.2058	MEF2C;INHBE
emetine HL60 DOWN	2/435	0.015356	0.0559493	0	0	12.9053	53.8958	CHAC1;INHBE
alprostadil HL60 DOWN	2/500	0.0199875	0.0598774	0	0	11.1836	43.7575	CHAC1;INHBE
GDC-0941 CTD 00004868	2/533	0.0225408	0.0613291	0	0	10.4708	39.7098	OSGIN1;INHBE
benzo[a]pyrene CTD 00005488	maj.24	0.0297711	0.0680483	0	0	4.40484	15.4796	MEF2C;OSGIN1;CHAC1;RNF186;INHBE
scriptaid PC3 UP	2/664	0.0339374	0.073699	0	0	8.34225	28.2238	MEF2C;CHAC1
irinotecan MCF7 UP	2/671	0.0346004	0.0742642	0	0	8.25198	27.7587	OSGIN1;CHAC1
cicloheximide HL60 DOWN	2/684	0.0358457	0.0756103	0	0	8.08923	26.9253	CHAC1;INHBE
AFLATOXIN B1 CTD 00007128	kwi.81	0.0370405	0.0762472	0	0	4.39753	14.4931	MEF2C;ACOT2;RNF186;INHBE
digitoxigenin HL60 DOWN	2/723	0.0396884	0.0798303	0	0	7.63622	24.6398	CHAC1;INHBE
formaldehyde CTD 00006001	kwi.92	0.0416369	0.0823382	0	0	4.21656	13.4035	GBP6;MEF2C;CHAC1;INHBE
Vitinoin CTD 00007069	2/780	0.045584	0.0849377	0	0	7.05582	21.7898	MEF2C;ACOT2
tamoxifen CTD 00006827	2/802	0.0479453	0.0866522	0	0	6.85393	20.8201	SPATA13;INHBE

## Sheet: B
Term	Overlap	P-value	Adjusted P-value	Old P-value	Old Adjusted P-value	Odds Ratio	Combined Score	Genes
progesterone CTD 00006624	1915-05-01	0.000142523	0.024799	0	0	23.6688	209.611	SOCS3;ELOVL1;DOCK4;KRT23;SOX11
genistein CTD 00007324	3/1231	0.00674909	0.123748	0	0	11.4607	57.2846	SOCS3;ELOVL1;KRT23
trichostatin A CTD 00000660	3584-04-01	0.0227477	0.125768	0	0	6.11285	23.1267	SOCS3;ELOVL1;DOCK4;SOX11
TERBUFOS CTD 00000658	2/715	0.0237829	0.125768	0	0	10.8163	40.4398	SOCS3;ELOVL1
Tetradioxin CTD 00006848	3768-04-01	0.0270953	0.125768	0	0	5.74885	20.7441	SOCS3;ELOVL1;CCL7;KRT23
ARSENIC CTD 00005442	2/853	0.0330775	0.125768	0	0	8.99741	30.6713	SOCS3;WNT3A
Demecolcine CTD 00005762	2/876	0.0347511	0.125768	0	0	8.75011	29.3964	SOCS3;DOCK4
zalcitabine PC3 UP	2/902	0.0366842	0.125768	0	0	8.48578	28.049	CCL7;KRT23
cimetidine PC3 DOWN	2/953	0.0406005	0.125768	0	0	8.00925	25.6615	ELOVL1;DOCK4
Retinoic acid CTD 00006918	4258-04-01	0.0412588	0.125768	0	0	4.93308	15.7261	SOCS3;DOCK4;CCL7;KRT23
estradiol CTD 00005920	4336-04-01	0.043879	0.125768	0	0	4.82025	15.0696	SOCS3;ELOVL1;KRT23;SOX11
diazinon CTD 00005790	2/1027	0.046567	0.125768	0	0	7.40215	22.7014	ELOVL1;DOCK4
benzo[a]pyrene CTD 00005488	4424-04-01	0.0469605	0.125768	0	0	4.69774	14.3678	SOCS3;DOCK4;CCL7;KRT23

## Sheet: C
Term	Overlap	P-value	Adjusted P-value	Old P-value	Old Adjusted P-value	Odds Ratio	Combined Score	Genes
melphalan CTD 00006262	4/279	0.000121776	0.031109	0	0	19.1088	172.234	CIITA;NUAK1;RASD1;RASL11B
Decitabine CTD 00000750	8/1800	0.000129351	0.031109	0	0	7.3819	66.09	RASL12;EGFL7;CIITA;RASL11B;KCNJ8;PLAU;ID1;ZNF467
folic acid CTD 00005997	3/194	0.000776531	0.124504	0	0	19.4274	139.113	PLAU;ID1;SLC40A1
camptothecin MCF7 UP	3/222	0.00114649	0.125482	0	0	16.9195	114.563	RASL11B;PLAU;ID1
progesterone CTD 00006624	1915-07-01	0.00130438	0.125482	0	0	5.52546	36.7003	KIAA1217;RASL12;RASD1;KCNJ8;PLAU;ID1;SLC40A1
emetine MCF7 UP	4/637	0.00269779	0.163571	0	0	8.15082	48.2147	NUAK1;PLAU;ID1;ZNF467
cicloheximide MCF7 UP	3/354	0.00431647	0.163571	0	0	10.4861	57.1002	NUAK1;PLAU;ID1
phenoxybenzamine PC3 DOWN	2/104	0.00432268	0.163571	0	0	22.9285	124.82	PLAU;ID1
4-PHENYLBUTYRIC ACID CTD 00002847	2/108	0.00465274	0.163571	0	0	22.0588	118.462	EGFL7;ID1
butyric acid BOSS	2/110	0.00482203	0.163571	0	0	21.6481	115.483	PLAU;FFAR2
tamoxifen CTD 00006827	4/802	0.00614506	0.163571	0	0	6.41036	32.6422	NUAK1;KCNJ8;PLAU;ID1
cephaeline MCF7 UP	4/811	0.00639109	0.163571	0	0	6.33589	32.0143	NUAK1;PLAU;ID1;ZNF467
Zoledronic acid CTD 00003127	3/425	0.00716819	0.163571	0	0	8.69031	42.9137	PLAU;ID1;ZNF467
CADMIUM BOSS	2/143	0.0080158	0.163571	0	0	16.554	79.8954	PLAU;SLC40A1
N-NITROSODIETHYLAMINE CTD 00005817	2/157	0.00959219	0.163571	0	0	15.0482	69.9261	RASD1;PLAU
Retinoic acid CTD 00006918	4258-09-01	0.0101406	0.163571	0	0	3.33227	15.2991	KIAA1217;CIITA;NUAK1;RASL11B;KCNJ8;PLAU;ID1;SLC40A1;BAHCC1
pyrvinium MCF7 UP	2/170	0.0111698	0.163571	0	0	13.8746	62.3601	PLAU;ID1
Dasatinib CTD 00004330	3/502	0.0112921	0.163571	0	0	7.32039	32.8221	NUAK1;PLAU;SLC40A1
Enterolactone CTD 00001393	4/971	0.0119307	0.163571	0	0	5.24343	23.2213	NUAK1;RASD1;RASL11B;ZNF467
cephaeline PC3 UP	3/514	0.0120362	0.163571	0	0	7.14408	31.5756	NUAK1;PLAU;ID1
formic acid BOSS	2/186	0.0132581	0.163571	0	0	12.6579	54.7221	FFAR4;FFAR2
17-Hydroxyandrostan-3-one CTD 00006776	2/187	0.0133939	0.163571	0	0	12.5889	54.2953	KIAA1217;ID1
actinomycin D CTD 00005748	2/190	0.0138049	0.163571	0	0	12.3861	53.0464	PLAU;ID1
monobenzone PC3 DOWN	2/204	0.0157951	0.163571	0	0	11.5195	47.7836	PLAU;ID1
Sodium dichromate CTD 00000827	2/208	0.0163852	0.163571	0	0	11.2935	46.432	PLAU;ID1
dexibuprofen PC3 DOWN	2/219	0.0180564	0.163571	0	0	10.7151	43.0132	PLAU;ID1
EINECS 250-892-2 CTD 00001193	2/223	0.0186814	0.163571	0	0	10.519	41.8681	PLAU;ID1
PHENCYCLIDINE CTD 00005881	2/226	0.0191563	0.163571	0	0	10.3766	41.0407	PLAU;CHST1
puromycin MCF7 UP	2/242	0.0217744	0.163571	0	0	9.67696	37.0339	NUAK1;ID1
raloxifene CTD 00007367	3/686	0.0258499	0.163571	0	0	5.29777	19.3657	NUAK1;PLAU;ID1
metronidazole PC3 UP	4/1316	0.0326749	0.163571	0	0	3.79451	12.9816	CIITA;KCNJ8;FFAR2;ZNF467
lycorine PC3 DOWN	2/302	0.0328139	0.163571	0	0	7.71804	26.3718	NUAK1;ID1
17-Ethynyl estradiol CTD 00005932	2/304	0.0332135	0.163571	0	0	7.66615	26.1017	RASL11B;SLC40A1
kojic acid CTD 00000624	2/313	0.0350353	0.165804	0	0	7.44089	24.9374	RASD1;ADRB3
emetine PC3 UP	3/801	0.0384386	0.169314	0	0	4.50728	14.6879	NUAK1;PLAU;ID1
indomethacin CTD 00006147	2/335	0.0396502	0.169314	0	0	6.94153	22.4049	NUAK1;PLAU
amikacin PC3 DOWN	2/335	0.0396502	0.169314	0	0	6.94153	22.4049	PLAU;ID1
Pirinixic acid CTD 00000280	4/1402	0.0399487	0.169314	0	0	3.54468	11.4144	NUAK1;KCNJ8;ID1;ZNF467
trichostatin A CTD 00000660	3584-07-01	0.0401285	0.169314	0	0	2.67515	8.60239	KIAA1217;RASL12;RASL11B;KCNJ8;PLAU;ID1;SLC40A1
5-azacytidine CTD 00005455	2/352	0.0433681	0.170613	0	0	6.59866	20.7068	CIITA;ID1
diltiazem PC3 DOWN	2/364	0.0460694	0.170613	0	0	6.37602	19.6229	PLAU;ID1
Cianidanol CTD 00005600	3/870	0.0472756	0.170762	0	0	4.13365	12.6149	RASD1;PLAU;SLC40A1

## Sheet: D
Term	Overlap	P-value	Adjusted P-value	Old P-value	Old Adjusted P-value	Odds Ratio	Combined Score	Genes
thioridazine HL60 UP	1965-06-01	3.2744e-09	4.37787e-06	0	0	59.5244	1162.94	DUSP4;CXCL10;CD83;CLEC7A;CCL4;IFIT3
1-chloro-2,4-dinitrobenzene CTD 00005848	8/242	2.25349e-08	1.50646e-05	0	0	21.0748	371.089	CD274;CXCL10;CD83;IRF1;IL1B;CCL4;PDE4B;CCR5
NICKEL SULFATE CTD 00001417	10/576	1.41289e-07	6.29679e-05	0	0	11.4217	180.148	DUSP4;EFNA1;CXCL10;CD83;IRF1;IL1B;CCL4;BHLHE40;TNFSF10;PDE4B
PHENCYCLIDINE CTD 00005881	7/226	2.91046e-07	8.12201e-05	0	0	19.1209	287.766	CXCL10;FGF7;CD83;IL1B;CCL4;CCR5;APOL2
suloctidil HL60 UP	6/141	3.47659e-07	8.12201e-05	0	0	25.915	385.409	CXCL10;IRF1;CCL4;TNFSF10;IFIT3;RASGRP3
Phorbol 12-myristate 13-acetate CTD 00006852	9/483	3.64488e-07	8.12201e-05	0	0	11.9351	176.935	DUSP4;MMP13;IL1B;CCL4;LMO2;TNFSF10;MEOX2;RASGRP1;RASGRP3
Demecolcine CTD 00005762	11/876	7.69209e-07	0.000146919	0	0	8.37333	117.879	DUSP4;RNF144A;CD274;CXCL10;CD83;LBH;IRF1;CCL4;TNFSF10;PDE4B;IFIT3
cephaeline HL60 UP	10/767	1.93457e-06	0.000310508	0	0	8.45575	111.241	DUSP4;CD83;CYTH4;IRF1;IL1B;CCL4;TNFSF10;PDE4B;PLEKHO2;SIRPB1
Roflumilast CTD 00003916	2013-03-01	2.09018e-06	0.000310508	0	0	161.757	2115.5	CXCL10;CCL4;PDE4B
rolipram CTD 00007371	2015-03-01	3.31609e-06	0.000438436	0	0	134.784	1700.53	CXCL10;IL1B;PDE4B
HELENALIN CTD 00000035	1953-04-01	3.74143e-06	0.000438436	0	0	45.1497	564.192	CD83;IL1B;TNFSF10;APLNR
indomethacin CTD 00006147	7/335	4.02787e-06	0.000438436	0	0	12.6962	157.716	CXCL10;LBH;SOX18;IL1B;CCL4;BHLHE40;SOX7
estradiol CTD 00005920	22/4336	4.26303e-06	0.000438436	0	0	4.43275	54.8133	DUSP4;IL33;CD83;SEMA6A;DAPK2;LMO2;NRARP;RASGRP1;SIRPB1;IFIT3;EFNA1;CXCL10;FGF7;DBP;LBH;MMP13;SOX18;IL1B;BHLHE40;TNFSF10;PDE4B;SOX7
mebendazole HL60 UP	7/346	4.97991e-06	0.000474977	0	0	12.2774	149.908	DUSP4;CD83;CYTH4;IL1B;BHLHE40;PDE4B;PLEKHO2
Decitabine CTD 00000750	14/1800	5.32883e-06	0.000474977	0	0	5.47928	66.5315	CD52;DAPK2;LMO2;RASGRP1;EFNA1;CXCL10;MMP13;SOX18;IRF1;BHLHE40;TNFSF10;PDE4B;APLNR;S1PR2
0317956-0000 MCF7 DOWN	2020-03-01	8.25109e-06	0.000668692	0	0	95.1176	1113.37	DUSP4;BHLHE40;RASGRP1
DL-Mevalonic acid CTD 00006329	1965-04-01	8.50245e-06	0.000668692	0	0	36.2459	423.177	IL1B;CCL4;TNFSF10;CCR5
Tamibarotene CTD 00002527	8/559	1.23753e-05	0.000900036	0	0	8.80626	99.509	DAPK2;IRF1;IL1B;CCL4;BHLHE40;TNFSF10;ASB2;IFIT3
Sodium dodecyl sulfate CTD 00006753	1972-04-01	1.27903e-05	0.000900036	0	0	32.5033	366.208	CXCL10;IL1B;CCL4;CCR5
Vitinoin CTD 00007069	9/780	1.8362e-05	0.0012275	0	0	7.22568	78.7977	DUSP4;CD52;CXCL10;MMP13;IRF1;IL1B;LMO2;BHLHE40;TNFSF10
vincristine CTD 00006988	11/1245	2.24917e-05	0.00143015	0	0	5.75605	61.6033	DUSP4;RNF144A;CD274;CXCL10;CD83;LBH;IRF1;CCL4;TNFSF10;PDE4B;SIRPB1
astemizole MCF7 UP	5/173	2.35327e-05	0.00143015	0	0	16.8299	179.359	DUSP4;EFNA1;IRF1;BHLHE40;IFIT3
simvastatin CTD 00007319	6/304	2.91631e-05	0.0016286	0	0	11.6435	121.589	CD83;MMP13;IL1B;CCL4;TNFSF10;CCR5
1,9-Pyrazoloanthrone CTD 00003948	5/181	2.92343e-05	0.0016286	0	0	16.0584	167.653	CXCL10;FGF7;MMP13;IL1B;TNFSF10
vigabatrin HL60 UP	1931-03-01	3.20417e-05	0.0016626	0	0	57.7181	597.295	DUSP4;PDE4B;TNFSF10
pimozide MCF7 UP	1991-04-01	3.23318e-05	0.0016626	0	0	25.3806	262.422	DUSP4;EFNA1;IRF1;BHLHE40
emetine HL60 UP	9/849	3.58107e-05	0.00177329	0	0	6.60829	67.6509	DUSP4;CD83;CYTH4;IRF1;IL1B;CCL4;TNFSF10;PDE4B;PLEKHO2
ARSENIC CTD 00005442	9/853	3.71522e-05	0.00177402	0	0	6.5756	67.0743	ESM1;CD83;SOX18;IRF1;IL1B;CCL4;BHLHE40;TNFSF10;PDE4B
8-azaguanine PC3 UP	6/323	4.09266e-05	0.00188686	0	0	10.9351	110.485	DUSP4;ESM1;CD83;IRF1;IL1B;BHLHE40
trolox CTD 00000557	1936-03-01	5.05447e-05	0.00225261	0	0	48.9607	484.351	MMP13;IL1B;TNFSF10
HELENALIN TTD 00008402	1937-03-01	5.49284e-05	0.00229744	0	0	47.5183	466.13	IL1B;TNFSF10;APLNR
Retinoic acid CTD 00006918	20/4258	5.49872e-05	0.00229744	0	0	3.70977	36.3869	CD52;CD83;SEMA6A;DAPK2;LMO2;NRARP;MEOX2;RASGRP1;IFIT3;EFNA1;ESM1;LBH;CLEC7A;IRF1;IL1B;CCL4;BHLHE40;TNFSF10;PDE4B;SOX7
usnic acid CTD 00002807	1938-03-01	5.9554e-05	0.00234187	0	0	46.1583	449.057	CXCL10;IL1B;CCL4
prenylamine HL60 UP	1938-03-01	5.9554e-05	0.00234187	0	0	46.1583	449.057	CXCL10;TNFSF10;IFIT3
trichostatin A CTD 00000660	18/3584	6.94945e-05	0.00265469	0	0	3.76143	36.013	DUSP4;CD83;SEMA6A;DAPK2;LMO2;NRARP;RASGRP1;IFIT3;EFNA1;RNF144A;LBH;MMP13;IL1B;BHLHE40;S1PR2;CCR5;ASB2;SOX7
fendiline MCF7 UP	4/117	8.63934e-05	0.00312184	0	0	19.5152	182.596	DUSP4;EFNA1;IRF1;BHLHE40
suloctidil MCF7 UP	4/117	8.63934e-05	0.00312184	0	0	19.5152	182.596	DUSP4;EFNA1;IRF1;BHLHE40
etynodiol HL60 DOWN	1944-03-01	9.27222e-05	0.00317871	0	0	39.3916	365.786	CD83;IL1B;BHLHE40
Acetovanillone CTD 00002374	1944-03-01	9.27222e-05	0.00317871	0	0	39.3916	365.786	CXCL10;MMP13;IL1B
prednisolone CTD 00006605	1947-03-01	0.000113052	0.00375465	0	0	36.7002	333.52	DBP;IL1B;CCL4
azacyclonol MCF7 UP	4/126	0.000115139	0.00375465	0	0	18.0674	163.86	DUSP4;EFNA1;IRF1;BHLHE40
Dinoprostone CTD 00007049	4/127	0.000118712	0.00377901	0	0	17.9196	161.972	CXCL10;IL1B;CCL4;CCR5
tamoxifen CTD 00006827	8/802	0.000158664	0.00493334	0	0	6.03463	52.7953	FGF7;LBH;IL1B;BHLHE40;TNFSF10;PDE4B;RASGRP1;IFIT3
mefloquine MCF7 UP	4/143	0.000187488	0.00562527	0	0	15.8441	135.971	DUSP4;EFNA1;IRF1;BHLHE40
benzene CTD 00005481	7/615	0.000193671	0.00562527	0	0	6.75159	57.7218	DUSP4;RNF144A;MMP13;PLEKHO2;CCR5;RASGRP1;IFIT3
TITANIUM DIOXIDE CTD 00000489	4/145	0.000197747	0.00562527	0	0	15.6178	133.197	CXCL10;IRF1;IL1B;CCL4
prenylamine MCF7 UP	4/145	0.000197747	0.00562527	0	0	15.6178	133.197	DUSP4;EFNA1;IRF1;BHLHE40
formaldehyde CTD 00006001	16/3192	0.000228055	0.00635229	0	0	3.52309	29.5444	DUSP4;CD274;CD83;NRARP;SIRPB1;IFIT3;CXCL10;CLEC7A;IRF1;IL1B;BHLHE40;TNFSF10;PDE4B;PLEKHO2;CCR5;SOX7
terfenadine HL60 UP	1960-03-01	0.000234328	0.0063938	0	0	28.3115	236.65	CD83;CCL4;IFIT3
tamoxifen MCF7 UP	1961-03-01	0.000246107	0.00653494	0	0	27.822	231.194	EFNA1;IRF1;BHLHE40
progesterone CTD 00006624	1915-12-01	0.000250051	0.00653494	0	0	4.06659	33.7276	EFNA1;IL33;CXCL10;CD83;IL1B;BHLHE40;TNFSF10;PDE4B;ASB2;RASGRP1;SOX7;IFIT3
MIGLITOL CTD 00002031	2024-12-02	0.000254164	0.00653494	0	0	105	869.141	IL1B;APLNR
Allococaine CTD 00005697	5/290	0.000268878	0.00666403	0	0	9.86216	81.0793	CXCL10;SEMA6A;IL1B;CCR5;APOL2
digoxin CTD 00005825	1963-03-01	0.000270802	0.00666403	0	0	26.8919	220.893	IL1B;CCL4;TNFSF10
troglitazone CTD 00002415	7/651	0.000274137	0.00666403	0	0	6.36232	52.183	EFNA1;CXCL10;CD83;IRF1;IL1B;CCL4;TNFSF10
eugenol CTD 00005949	4/161	0.000294966	0.0070423	0	0	14.0149	113.922	IL1B;CCL4;PDE4B;CCR5
corbadrine HL60 UP	1966-03-01	0.000310759	0.00716353	0	0	25.6075	206.819	DUSP4;TNFSF10;PDE4B
Masoprocol CTD 00006416	1966-03-01	0.000310759	0.00716353	0	0	25.6075	206.819	MMP13;IL1B;TNFSF10
beclomethasone CTD 00005468	1967-03-01	0.000324876	0.00736202	0	0	25.2061	202.457	CXCL10;IL1B;CCL4
benzo[a]pyrene CTD 00005488	19/4424	0.000339023	0.00750102	0	0	3.19491	25.5255	CD83;SEMA6A;LMO2;RASGRP1;IFIT3;EFNA1;RNF144A;CXCL10;ESM1;LBH;MMP13;IRF1;IL1B;CCL4;TNFSF10;PDE4B;APLNR;CCR5;ASB2
Silica CTD 00006678	8/898	0.00034223	0.00750102	0	0	5.35674	42.7469	IL33;CD52;CXCL10;ESM1;CD83;IRF1;IL1B;CCL4
mephentermine HL60 UP	1970-03-01	0.000369691	0.00772308	0	0	24.0738	190.252	CYTH4;IL1B;BHLHE40
quercetin HL60 UP	1970-03-01	0.000369691	0.00772308	0	0	24.0738	190.252	DUSP4;CLEC7A;CCL4
fluspirilene MCF7 UP	1970-03-01	0.000369691	0.00772308	0	0	24.0738	190.252	DUSP4;IRF1;BHLHE40
gossypol HL60 UP	1972-03-01	0.000401671	0.00826206	0	0	23.3737	182.779	CLEC7A;IL1B;CCL4
ciclopirox HL60 UP	4/177	0.000422537	0.00855957	0	0	12.7084	98.7346	CD83;IL1B;CCL4;BHLHE40
ns-398 CTD 00002958	1974-03-01	0.000435379	0.00868808	0	0	22.713	175.782	CXCL10;IL1B;TNFSF10
terfenadine MCF7 UP	4/184	0.000489154	0.00958926	0	0	12.2099	93.0739	DUSP4;EFNA1;IRF1;BHLHE40
anisomycin MCF7 UP	7/718	0.000494884	0.00958926	0	0	5.74279	43.7094	DUSP4;EFNA1;CXCL10;CD83;IRF1;BHLHE40;RASGRP1
betamethasone CTD 00005504	2017-02-01	0.00052043	0.00979464	0	0	69.9825	529.127	IL1B;CCL4
puromycin CTD 00006652	2017-02-01	0.00052043	0.00979464	0	0	69.9825	529.127	IRF1;CCL4
disulfiram	1979-03-01	0.00052746	0.00979464	0	0	21.2134	160.107	IL1B;APLNR;CCR5
Isoguanine BOSS	4/192	0.000574101	0.0105147	0	0	11.6856	87.206	IL33;CXCL10;IL1B;CCR5
strophanthidin HL60 UP	5/344	0.000586838	0.0106027	0	0	8.26844	61.5235	CD83;IL1B;CCL4;PDE4B;PLEKHO2
SILVER CTD 00006742	1984-03-01	0.00063117	0.0110575	0	0	19.8989	146.614	IRF1;IL1B;TNFSF10
3-Phenyl-5H-indeno[1,2-c]pyridazin-5-one TTD 00000814	2019-02-01	0.000652712	0.0110575	0	0	61.743	452.847	APLNR;TNFSF10
AC1LEORR TTD 00001514	2019-02-01	0.000652712	0.0110575	0	0	61.743	452.847	IL1B;APLNR
doxycycline CTD 00005875	2019-02-01	0.000652712	0.0110575	0	0	61.743	452.847	MMP13;IL1B
curcumin TTD 00007338	1985-03-01	0.000653358	0.0110575	0	0	19.6552	144.139	MMP13;IL1B;APLNR
felodipine MCF7 UP	1987-03-01	0.000699215	0.0116856	0	0	19.1853	139.392	EFNA1;IRF1;BHLHE40
Manumycin A CTD 00002318	2020-02-01	0.000724319	0.0119557	0	0	58.3099	421.597	MMP13;IL1B
15-Acetyldeoxynivalenol CTD 00002073	1989-03-01	0.000747077	0.012181	0	0	18.7373	134.896	IL1B;CCL4;BHLHE40
MERCURY CTD 00006274	5/364	0.000757292	0.0121988	0	0	7.79984	56.0478	SOX18;IL1B;BHLHE40;TNFSF10;MEOX2
2,2',4,4',5,5'-Hexachlorobiphenyl CTD 00000731	4/208	0.000774676	0.0122874	0	0	10.7603	77.0771	SEMA6A;IL1B;BHLHE40;TNFSF10
9,10-Phenanthrenequinone TTD 00001360	1991-03-01	0.00079698	0.0122874	0	0	18.3096	130.633	IL1B;TNFSF10;APLNR
metixene MCF7 UP	2021-02-01	0.000799552	0.0122874	0	0	55.2382	393.929	DUSP4;BHLHE40
norcyclobenzaprine MCF7 UP	2021-02-01	0.000799552	0.0122874	0	0	55.2382	393.929	DUSP4;BHLHE40
Alitretinoin CTD 00003402	4/212	0.000831681	0.0126117	0	0	10.5513	74.8303	CD83;IRF1;IL1B;TNFSF10
zardaverine HL60 UP	1993-03-01	0.000848956	0.0126117	0	0	17.9009	126.586	DUSP4;IL1B;PDE4B
Levorphanol tartrate BOSS	1993-03-01	0.000848956	0.0126117	0	0	17.9009	126.586	IL33;IL1B;APLNR
Muramyl Dipeptide CTD 00005307	2022-02-01	0.000878396	0.0129057	0	0	52.4737	369.279	CD83;IL1B
GNF-Pf-2272 TTD 00008257	1995-03-01	0.000903041	0.0131235	0	0	17.51	122.741	IL1B;TNFSF10;S1PR2
GNF-PF-3832 TTD 00008267	2023-02-01	0.000960837	0.0138133	0	0	49.9724	347.194	APLNR;TNFSF10
Calcimycin CTD 00005287	1999-03-01	0.00101767	0.0140077	0	0	16.777	115.598	IL1B;TNFSF10;APLNR
tanespimycin ssMCF7 DOWN	2024-02-01	0.00104686	0.0140077	0	0	47.6986	327.306	BHLHE40;RASGRP1
2,6-DICHLOROINDOPHENOL CTD 00007030	2024-02-01	0.00104686	0.0140077	0	0	47.6986	327.306	CXCL10;CCL4
protriptyline MCF7 UP	2024-02-01	0.00104686	0.0140077	0	0	47.6986	327.306	DUSP4;BHLHE40
papaverine HL60 UP	2024-02-01	0.00104686	0.0140077	0	0	47.6986	327.306	DUSP4;PDE4B
ofloxacin CTD 00007052	2024-02-01	0.00104686	0.0140077	0	0	47.6986	327.306	MMP13;IL1B
ACMC-20mvek CTD 00002629	3/100	0.0010477	0.0140077	0	0	16.6032	113.917	CD83;IL1B;TNFSF10
LY 294002 CTD 00003061	4/227	0.00107199	0.0141433	0	0	9.83408	67.2477	FGF7;MMP13;IL1B;TNFSF10
cytarabine CTD 00005743	6/594	0.00108723	0.0141433	0	0	5.81393	39.675	DUSP4;EFNA1;LBH;TNFSF10;PDE4B;APLNR
FENRETINIDE CTD 00007166	4/228	0.00108957	0.0141433	0	0	9.78968	66.7849	IRF1;IL1B;BHLHE40;TNFSF10
ALENDRONATE SODIUM BOSS	2025-02-01	0.00113646	0.0143991	0	0	45.6224	309.313	MMP13;IL1B
GNF-PF-2812 TTD 00008260	2025-02-01	0.00113646	0.0143991	0	0	45.6224	309.313	TNFSF10;APLNR
NICKEL CHLORIDE CTD 00001064	5/399	0.00114159	0.0143991	0	0	7.09427	48.0661	EFNA1;SOX18;IL1B;TNFSF10;APOL2
1-NITROPYRENE CTD 00001569	4/234	0.00119933	0.0146784	0	0	9.5314	64.1081	CXCL10;ESM1;IRF1;IL1B
tyrphostin AG-1478 MCF7 UP	3/105	0.00120624	0.0146784	0	0	15.7854	106.082	EFNA1;IRF1;BHLHE40
calcitriol CTD 00005558	1958-11-01	0.00121945	0.0146784	0	0	3.50925	23.5448	RNF144A;CD274;LBH;DAPK2;IRF1;IL1B;LMO2;PDE4B;NRARP;PLEKHO2;IFIT3
maprotiline MCF7 UP	2026-02-01	0.00122961	0.0146784	0	0	43.7193	292.966	DUSP4;BHLHE40
tetrandrine MCF7 UP	2026-02-01	0.00122961	0.0146784	0	0	43.7193	292.966	DUSP4;BHLHE40
Antimycin A CTD 00005427	2026-02-01	0.00122961	0.0146784	0	0	43.7193	292.966	IL1B;CCL4
9,10-Phenanthrenequinone CTD 00000222	3/107	0.00127366	0.0150698	0	0	15.4802	103.189	IL1B;TNFSF10;APLNR
CP-55940 CTD 00002329	2027-02-01	0.0013263	0.0152867	0	0	41.9684	278.056	IL1B;CCL4
bisindolylmaleimide IX CTD 00002617	2027-02-01	0.0013263	0.0152867	0	0	41.9684	278.056	IL1B;TNFSF10
dacarbazine CTD 00005747	2027-02-01	0.0013263	0.0152867	0	0	41.9684	278.056	IRF1;TNFSF10
puromycin MCF7 UP	4/242	0.00135746	0.0155122	0	0	9.20728	60.7878	EFNA1;IRF1;BHLHE40;RASGRP1
0316684-0000 MCF7 DOWN	2028-02-01	0.00142652	0.0160274	0	0	40.3522	264.409	DUSP4;RASGRP1
Digoxigenin CTD 00005824	2028-02-01	0.00142652	0.0160274	0	0	40.3522	264.409	IL1B;CCL4
ionomycin CTD 00007090	3/112	0.00145249	0.0161831	0	0	14.7664	96.4909	DUSP4;IL1B;CCL4
lanatoside C CTD 00000952	2029-02-01	0.00153025	0.0167701	0	0	38.8558	251.876	IL1B;CCL4
ICN 1229 CTD 00006697	2029-02-01	0.00153025	0.0167701	0	0	38.8558	251.876	IL1B;TNFSF10
emetine MCF7 UP	6/637	0.0015552	0.0167862	0	0	5.40571	34.9541	DUSP4;EFNA1;CD83;DBP;IRF1;BHLHE40
8-azaguanine HL60 UP	5/428	0.00155684	0.0167862	0	0	6.59811	42.6574	DUSP4;CD83;IL1B;CCL4;PDE4B
lanatoside C HL60 UP	5/432	0.00162183	0.0172387	0	0	6.53496	41.9819	CD83;IL1B;CCL4;PDE4B;PLEKHO2
chlorophyllin CTD 00000324	1930-02-01	0.00163749	0.0172387	0	0	37.4662	240.33	CXCL10;IFIT3
dequalinium chloride MCF7 UP	1930-02-01	0.00163749	0.0172387	0	0	37.4662	240.33	DUSP4;BHLHE40
tetryzoline HL60 UP	3/119	0.00172822	0.0175741	0	0	13.8705	88.2253	DUSP4;IL1B;PDE4B
lasalocid HL60 UP	1931-02-01	0.00174821	0.0175741	0	0	36.1724	229.665	CD83;CCL4
peptidoglycan CTD 00006490	1931-02-01	0.00174821	0.0175741	0	0	36.1724	229.665	CLEC7A;IL1B
methylbenzethonium chloride MCF7 UP	1931-02-01	0.00174821	0.0175741	0	0	36.1724	229.665	DUSP4;BHLHE40
astemizole TTD 00002176	1931-02-01	0.00174821	0.0175741	0	0	36.1724	229.665	IL1B;APLNR
GNF-Pf-78 TTD 00008278	1931-02-01	0.00174821	0.0175741	0	0	36.1724	229.665	IL1B;TNFSF10
PD 98059 CTD 00003206	4/262	0.00181573	0.0180437	0	0	8.48493	53.5507	FGF7;MMP13;IL1B;CCR5
anisomycin PC3 UP	7/899	0.00184192	0.0180437	0	0	4.53445	28.5532	EFNA1;ESM1;CD83;MMP13;IRF1;IL1B;PDE4B
27-hydroxycholesterol CTD 00002877	1932-02-01	0.0018624	0.0180437	0	0	34.9649	219.786	IL1B;CCL4
Cobalt sulfate CTD 00001238	1932-02-01	0.0018624	0.0180437	0	0	34.9649	219.786	IL1B;CCL4
minocycline CTD 00006338	1932-02-01	0.0018624	0.0180437	0	0	34.9649	219.786	MMP13;CCL4
niclosamide MCF7 UP	3/123	0.00189949	0.0181401	0	0	13.4054	84.0006	DUSP4;BHLHE40;RASGRP1
perhexiline MCF7 UP	3/123	0.00189949	0.0181401	0	0	13.4054	84.0006	DUSP4;EFNA1;BHLHE40
digoxin HL60 UP	4/267	0.00194521	0.0183843	0	0	8.3215	51.946	CD83;IL1B;CCL4;PDE4B
EGTA CTD 00005889	1933-02-01	0.00198006	0.0183843	0	0	33.8353	210.612	CXCL10;TNFSF10
CADMIUM SELENIDE CTD 00002452	1933-02-01	0.00198006	0.0183843	0	0	33.8353	210.612	IL1B;IRF1
digitoxin	1933-02-01	0.00198006	0.0183843	0	0	33.8353	210.612	IL1B;TNFSF10
prochlorperazine HL60 UP	1934-02-01	0.00210115	0.0189814	0	0	32.7763	202.075	CD83;CCL4
perphenazine MCF7 UP	1934-02-01	0.00210115	0.0189814	0	0	32.7763	202.075	DUSP4;BHLHE40
astemizole BOSS	1934-02-01	0.00210115	0.0189814	0	0	32.7763	202.075	IL1B;APLNR
Geranylgeranyl pyrophosphate CTD 00000102	1934-02-01	0.00210115	0.0189814	0	0	32.7763	202.075	IL1B;TNFSF10
puromycin HL60 UP	4/274	0.00213708	0.0191763	0	0	8.10288	49.8191	DUSP4;CD83;PDE4B;IFIT3
Prazosin hydrochloride BOSS	1935-02-01	0.00222569	0.0198383	0	0	31.7815	194.112	CD52;IL1B
colchicine HL60 UP	3/132	0.00232266	0.020302	0	0	12.4645	75.5977	DUSP4;CD83;PDE4B
co-dergocrine mesilate HL60 UP	3/132	0.00232266	0.020302	0	0	12.4645	75.5977	DUSP4;TNFSF10;PDE4B
fenbendazole MCF7 UP	1936-02-01	0.00235364	0.020302	0	0	30.8452	186.669	DUSP4;BHLHE40
pyrithione CTD 00000427	1936-02-01	0.00235364	0.020302	0	0	30.8452	186.669	IL1B;APLNR
ciprofloxacin CTD 00005674	1936-02-01	0.00235364	0.020302	0	0	30.8452	186.669	MMP13;IL1B
miconazole MCF7 UP	1937-02-01	0.00248499	0.0212976	0	0	29.9624	179.699	IRF1;BHLHE40
genistein CTD 00007324	8/1231	0.0026466	0.0225383	0	0	3.83013	22.7298	DUSP4;ESM1;IL1B;CCL4;BHLHE40;TNFSF10;NRARP;RASGRP1
1,6,7,8,9,11a,12,13,14,14a-Decahydro-1,13-dihydroxy-6-methyl-4H-cyclopent [f]oxacyclotridecin-4-one CTD 00007351	1939-02-01	0.00275786	0.0233371	0	0	28.34	167.016	IL1B;TNFSF10
mebendazole MCF7 UP	1940-02-01	0.00289935	0.0242277	0	0	27.5928	161.232	DUSP4;BHLHE40
trifluoperazine MCF7 UP	1940-02-01	0.00289935	0.0242277	0	0	27.5928	161.232	DUSP4;BHLHE40
helveticoside HL60 UP	4/301	0.00300021	0.0248176	0	0	7.35615	42.7324	CD83;IL1B;CCL4;PDE4B
RUTIN CTD 00006712	1941-02-01	0.0030442	0.0248176	0	0	26.8839	155.779	CXCL10;IL1B
Salbutamol CTD 00005336	1941-02-01	0.0030442	0.0248176	0	0	26.8839	155.779	IL1B;PDE4B
quinisocaine MCF7 UP	1941-02-01	0.0030442	0.0248176	0	0	26.8839	155.779	IRF1;BHLHE40
Dasatinib CTD 00004330	5/502	0.00311321	0.0252264	0	0	5.59442	32.2916	CD274;CXCL10;LBH;CCL4;IFIT3
etoposide HL60 UP	3/147	0.00314962	0.0252485	0	0	11.1577	64.2734	CD83;IL1B;CCL4
podophyllotoxin HL60 UP	4/306	0.00318277	0.0252485	0	0	7.23252	41.587	DUSP4;CD83;IL1B;PDE4B
orciprenaline HL60 UP	1942-02-01	0.00319238	0.0252485	0	0	26.2105	150.632	DUSP4;PDE4B
astemizole CTD 00007123	1942-02-01	0.00319238	0.0252485	0	0	26.2105	150.632	IL1B;APLNR
CHROMIUM CTD 00005668	3/148	0.00321036	0.0252485	0	0	11.0801	63.6153	IL1B;BHLHE40;TNFSF10
Gadodiamide hydrate CTD 00002623	1943-02-01	0.00334388	0.0258426	0	0	25.57	145.765	CXCL10;IFIT3
benzethonium chloride MCF7 UP	1943-02-01	0.00334388	0.0258426	0	0	25.57	145.765	DUSP4;BHLHE40
monensin MCF7 UP	1943-02-01	0.00334388	0.0258426	0	0	25.57	145.765	DUSP4;BHLHE40
635-65-4 CTD 00005510	3/151	0.00339689	0.0260656	0	0	10.8539	61.7033	CXCL10;MMP13;IL1B
pergolide HL60 UP	4/312	0.00341172	0.0260656	0	0	7.08947	40.272	DUSP4;CYTH4;PDE4B;PLEKHO2
cephaeline PC3 UP	5/514	0.00344441	0.0261328	0	0	5.45916	30.9589	EFNA1;IRF1;IL1B;BHLHE40;PDE4B
hexetidine MCF7 UP	1944-02-01	0.0034987	0.0261328	0	0	24.9599	141.157	DUSP4;BHLHE40
thiostrepton CTD 00006881	1944-02-01	0.0034987	0.0261328	0	0	24.9599	141.157	IL1B;CCL4
STYRENE CTD 00001125	1944-02-01	0.0034987	0.0261328	0	0	24.9599	141.157	IL1B;TNFSF10
N-Acetyl-L-cysteine CTD 00005305	4/315	0.00353031	0.0262224	0	0	7.02001	39.6375	DUSP4;IRF1;IL1B;TNFSF10
thioridazine MCF7 UP	3/155	0.00365577	0.0267168	0	0	10.5661	59.2914	DUSP4;IRF1;BHLHE40
strophanthidin MCF7 UP	1945-02-01	0.00365682	0.0267168	0	0	24.3782	136.79	DUSP4;EFNA1
Bromoacetate CTD 00000832	1945-02-01	0.00365682	0.0267168	0	0	24.3782	136.79	IL1B;TNFSF10
resveratrol CTD 00002483	9/1601	0.00371351	0.0269835	0	0	3.34965	18.7439	EFNA1;RNF144A;CXCL10;MMP13;CLEC7A;IL1B;BHLHE40;TNFSF10;RASGRP1
oxygen CTD 00006454	5/524	0.00373931	0.0270241	0	0	5.35122	29.9072	EFNA1;CD274;MMP13;IL1B;BHLHE40
clomifene MCF7 UP	1946-02-01	0.00381822	0.0272993	0	0	23.823	132.646	IRF1;BHLHE40
tetracycline CTD 00006851	1946-02-01	0.00381822	0.0272993	0	0	23.823	132.646	MMP13;IL1B
curcumin CTD 00000663	5/528	0.00386222	0.0274491	0	0	5.30921	29.5007	CYTH4;MMP13;IL1B;TNFSF10;APLNR
Pyrrolidine dithiocarbamate CTD 00001021	3/159	0.00392642	0.0274491	0	0	10.2931	57.0243	DUSP4;IRF1;IL1B
2-Mercaptobenzothiazole CTD 00000240	1947-02-01	0.0039829	0.0274491	0	0	23.2924	128.708	CCL4;CCR5
BW-B70C MCF7 UP	1947-02-01	0.0039829	0.0274491	0	0	23.2924	128.708	DUSP4;BHLHE40
Cardidigin CTD 00005822	1947-02-01	0.0039829	0.0274491	0	0	23.2924	128.708	IL1B;TNFSF10
AMILORIDE CTD 00005369	1947-02-01	0.0039829	0.0274491	0	0	23.2924	128.708	IL1B;TNFSF10
T-2 TOXIN CTD 00006824	1947-02-01	0.0039829	0.0274491	0	0	23.2924	128.708	MMP13;IL1B
syrosingopine MCF7 UP	1948-02-01	0.00415083	0.0284598	0	0	22.7849	124.963	DBP;BHLHE40
menadione HL60 UP	4/334	0.00434737	0.0295047	0	0	6.60943	35.9433	DUSP4;CD83;IL1B;CCL4
mifepristone CTD 00007083	4/334	0.00434737	0.0295047	0	0	6.60943	35.9433	ESM1;IL1B;TNFSF10;RASGRP1
puromycin PC3 UP	5/552	0.00466167	0.0309367	0	0	5.06999	27.2177	EFNA1;CD83;IRF1;BHLHE40;PDE4B
astemizole HL60 UP	1951-02-01	0.00467406	0.0309367	0	0	21.3867	114.755	DUSP4;CCL4
5H-quinolino[8,7-c][1,2]benzothiazine 6,6-dioxide TTD 00001179	1951-02-01	0.00467406	0.0309367	0	0	21.3867	114.755	IL1B;APLNR
budesonide CTD 00007317	1951-02-01	0.00467406	0.0309367	0	0	21.3867	114.755	IL1B;CCL4
ZINC SULFIDE CTD 00001487	1951-02-01	0.00467406	0.0309367	0	0	21.3867	114.755	IRF1;IL1B
pyrvinium MCF7 UP	3/170	0.00473276	0.031171	0	0	9.60981	51.4437	DUSP4;BHLHE40;RASGRP1
POTASSIUM DICHROMATE CTD 00006598	5/556	0.00480559	0.0314955	0	0	5.03215	26.8615	IL1B;CCL4;BHLHE40;TNFSF10;SOX7
isoetarine HL60 UP	1952-02-01	0.0048549	0.0316634	0	0	20.9579	111.659	DUSP4;TNFSF10
morphine BOSS	3/172	0.00488932	0.0317331	0	0	9.49512	50.5207	CD52;IL1B;CCR5
Cyclohexanecarboxamide, 4-(1-aminoethyl)-N-4-pyridinyl-, trans- CTD 00003513	1953-02-01	0.00503894	0.0325462	0	0	20.5459	108.699	IL1B;TNFSF10
cephaeline MCF7 UP	6/811	0.00515678	0.0329937	0	0	4.19912	22.1186	DUSP4;EFNA1;CD83;DBP;IRF1;BHLHE40
p-Phenylenediamine CTD 00001400	1954-02-01	0.00522616	0.0329937	0	0	20.1498	105.869	CD274;CCL4
2,4-Dinitrofluorobenzene CTD 00005849	1954-02-01	0.00522616	0.0329937	0	0	20.1498	105.869	CD83;CCL4
propofol MCF7 UP	1954-02-01	0.00522616	0.0329937	0	0	20.1498	105.869	IRF1;BHLHE40
5-azacytidine CTD 00005455	4/352	0.00523161	0.0329937	0	0	6.26181	32.8935	FGF7;TNFSF10;ASB2;SIRPB1
cicloheximide MCF7 UP	4/354	0.00533676	0.0334988	0	0	6.2254	32.5783	EFNA1;DBP;IRF1;BHLHE40
histamine BOSS	3/180	0.00554681	0.0346546	0	0	9.0623	47.0744	IL33;CXCL10;IL1B
MG-262 PC3 DOWN	4/360	0.00566075	0.035202	0	0	6.1186	31.6589	DUSP4;EFNA1;IL33;BHLHE40
calmidazolium MCF7 UP	3/182	0.00571908	0.0354	0	0	8.96014	46.2697	DUSP4;EFNA1;BHLHE40
prochlorperazine MCF7 UP	1958-02-01	0.0060066	0.0366704	0	0	18.7068	95.6832	DUSP4;BHLHE40
digoxin	1958-02-01	0.0060066	0.0366704	0	0	18.7068	95.6832	IL1B;TNFSF10
methylene blue TTD 00009259	1958-02-01	0.0060066	0.0366704	0	0	18.7068	95.6832	TNFSF10;APLNR
nocodazole HL60 UP	4/373	0.00640746	0.0386779	0	0	5.89913	29.7923	DUSP4;CD83;IL1B;PDE4B
actinomycin D CTD 00005748	3/190	0.00644024	0.0386779	0	0	8.57335	43.2542	IRF1;IL1B;TNFSF10
3'-Azido-3'-deoxythymidine CTD 00007047	4/374	0.00646749	0.0386779	0	0	5.88288	29.6554	CD83;IL1B;TNFSF10;CCR5
AGN-PC-0JHFVD BOSS	3/191	0.00653403	0.0386779	0	0	8.52731	42.8986	IL33;CXCL10;IL1B
nitric oxide BOSS	3/191	0.00653403	0.0386779	0	0	8.52731	42.8986	MMP13;IL1B;MEOX2
fluticasone HL60 UP	1961-02-01	0.00662471	0.0386779	0	0	17.7529	89.0654	DUSP4;CCL4
disulfiram BOSS	1961-02-01	0.00662471	0.0386779	0	0	17.7529	89.0654	IL1B;APLNR
cimetidine CTD 00005672	1961-02-01	0.00662471	0.0386779	0	0	17.7529	89.0654	IL1B;PDE4B
Electrocorundum CTD 00005364	1961-02-01	0.00662471	0.0386779	0	0	17.7529	89.0654	IL1B;TNFSF10
methylene blue CTD 00006312	1961-02-01	0.00662471	0.0386779	0	0	17.7529	89.0654	TNFSF10;APLNR
Angiotensin II, human BOSS	3/193	0.00672405	0.0390872	0	0	8.4367	42.2009	IL1B;APLNR;MEOX2
ouabain HL60 UP	4/379	0.00677324	0.0392027	0	0	5.80296	28.9845	CD83;IL1B;CCL4;PDE4B
nocodazole MCF7 UP	1962-02-01	0.00683693	0.0392316	0	0	17.4561	87.0261	DUSP4;BHLHE40
Lead dichloride CTD 00001407	1962-02-01	0.00683693	0.0392316	0	0	17.4561	87.0261	IL1B;BHLHE40
CADMIUM CTD 00005555	7/1142	0.00691268	0.0394968	0	0	3.51822	17.501	DUSP4;MMP13;SOX18;IL1B;TNFSF10;S1PR2;RASGRP1
Dinoprostone BOSS	3/196	0.00701523	0.039784	0	0	8.3043	41.1866	CXCL10;MMP13;IL1B
chlorprothixene MCF7 UP	1963-02-01	0.00705221	0.039784	0	0	17.1691	85.0629	IRF1;BHLHE40
Dibenziodolium CTD 00000351	1963-02-01	0.00705221	0.039784	0	0	17.1691	85.0629	MMP13;IL1B
Acetylcholine bromide BOSS	3/198	0.00721347	0.0405227	0	0	8.2183	40.531	CD52;IL1B;MEOX2
chlorpyrifos CTD 00005880	1964-02-01	0.00727055	0.0406725	0	0	16.8913	83.1717	CD83;IL1B
piperlongumine HL60 DOWN	4/389	0.00741333	0.0412984	0	0	5.64935	27.7071	CLEC7A;CCL4;LMO2;BHLHE40
VANADIUM PENTOXIDE CTD 00002655	1965-02-01	0.00749193	0.0413914	0	0	16.6224	81.3488	CXCL10;IRF1
Naloxone hydrochloride BOSS	1965-02-01	0.00749193	0.0413914	0	0	16.6224	81.3488	IL1B;APLNR
UNII-9XX54M675G CTD 00004634	1967-02-01	0.00794377	0.0437071	0	0	16.1093	77.8944	CD274;IL1B
alprostadil HL60 UP	4/409	0.00881128	0.0482815	0	0	5.36488	25.3851	DUSP4;IL1B;PDE4B;RASGRP3
Mustard gas CTD 00006356	3/214	0.00891967	0.0486759	0	0	7.58896	35.8161	FGF7;IL1B;CCL4
profenamine PC3 UP	1972-02-01	0.00912577	0.0495982	0	0	14.9549	70.2379	MMP13;IL1B
cefalotin HL60 UP	1973-02-01	0.00937105	0.0507251	0	0	14.7435	68.8541	DUSP4;SEMA6A
digitoxigenin HL60 UP	4/421	0.00972794	0.0524446	0	0	5.2073	24.1241	CD83;IL1B;CCL4;PDE4B
kainic acid BOSS	1976-02-01	0.0101244	0.054363	0	0	14.1437	64.9591	IL1B;CCR5
resveratrol BOSS	3/225	0.0102189	0.0546506	0	0	7.20891	33.0422	MMP13;IL1B;TNFSF10
MS-275 PC3 UP	4/431	0.0105378	0.0561319	0	0	5.08275	23.1406	IL33;MMP13;IL1B;PDE4B
2-Fluoroadenosine BOSS	1979-02-01	0.0109039	0.0576226	0	0	13.5906	61.4108	CD52;IL1B
clonidine HL60 UP	1979-02-01	0.0109039	0.0576226	0	0	13.5906	61.4108	DUSP4;IL1B
haloperidol BOSS	1980-02-01	0.0111695	0.057882	0	0	13.4157	60.2976	CD52;IL1B
lycorine MCF7 UP	1980-02-01	0.0111695	0.057882	0	0	13.4157	60.2976	DUSP4;BHLHE40
dinoprost HL60 UP	1980-02-01	0.0111695	0.057882	0	0	13.4157	60.2976	DUSP4;PDE4B
geldanamycin HL60 UP	1980-02-01	0.0111695	0.057882	0	0	13.4157	60.2976	DUSP4;PDE4B
CARBON TETRACHLORIDE BOSS	1980-02-01	0.0111695	0.057882	0	0	13.4157	60.2976	MMP13;IL1B
Tetradioxin CTD 00006848	14/3768	0.0116162	0.0599649	0	0	2.32454	10.3566	DUSP4;LMO2;MEOX2;RASGRP1;IFIT3;EFNA1;RNF144A;CXCL10;MMP13;IRF1;IL1B;BHLHE40;TNFSF10;ASB2
dihydroergocristine HL60 UP	1982-02-01	0.0117091	0.0602118	0	0	13.0789	58.1672	DUSP4;PDE4B
3,3',4,4',5-Pentachlorobiphenyl CTD 00001077	3/237	0.0117559	0.0602207	0	0	6.83507	30.371	CXCL10;SEMA6A;IL1B
bay 11-7082 CTD 00003959	1983-02-01	0.0119832	0.0611273	0	0	12.9168	57.1473	IL33;IL1B
8-HYDROXYQUINOLINE CTD 00007045	3/239	0.0120243	0.0611273	0	0	6.77645	29.9575	ESM1;BHLHE40;TNFSF10
tolnaftate PC3 DOWN	3/240	0.0121598	0.0615734	0	0	6.74752	29.754	CD83;IL1B;APOL2
NSC94017 CTD 00005320	1984-02-01	0.01226	0.0615734	0	0	12.7587	56.1561	IL1B;PDE4B
Lead(II) acetate CTD 00000394	1984-02-01	0.01226	0.0615734	0	0	12.7587	56.1561	IL1B;TNFSF10
tretinoin HL60 UP	3/241	0.0122963	0.0615734	0	0	6.71883	29.5525	CYTH4;IRF1;BHLHE40
Rubidomycin hydrochloride	1985-02-01	0.0125397	0.0623257	0	0	12.6043	55.1924	IL1B;TNFSF10
Idocyklin BOSS	1985-02-01	0.0125397	0.0623257	0	0	12.6043	55.1924	MMP13;IL1B
digoxigenin HL60 UP	3/244	0.0127108	0.0629422	0	0	6.63418	28.9602	CD83;IL1B;PDE4B
chitosamine CTD 00006030	1986-02-01	0.0128222	0.0631674	0	0	12.4536	54.2552	MMP13;IL1B
quinpirole HL60 UP	3/245	0.0128508	0.0631674	0	0	6.60643	28.7667	DUSP4;IL1B;PDE4B
Pioglitazone BOSS	1987-02-01	0.0131074	0.0641929	0	0	12.3065	53.3435	CXCL10;IL1B
GNF-Pf-4325 CTD 00005408	1988-02-01	0.0133955	0.065364	0	0	12.1628	52.4562	IL1B;CCL4
arsenite CTD 00000779	7/1300	0.0135984	0.0661132	0	0	3.06239	13.1615	LBH;SEMA6A;IRF1;IL1B;CCL4;BHLHE40;NRARP
Octa-2,4,6-trienoic acid CTD 00002551	1989-02-01	0.0136862	0.0662988	0	0	12.0224	51.5924	IRF1;BHLHE40
azacyclonol PC3 UP	1990-02-01	0.0139797	0.0666243	0	0	11.8852	50.7514	CD83;IFIT3
harmine MCF7 UP	1990-02-01	0.0139797	0.0666243	0	0	11.8852	50.7514	DUSP4;BHLHE40
(+)-chelidonine HL60 UP	1990-02-01	0.0139797	0.0666243	0	0	11.8852	50.7514	DUSP4;PDE4B
chrysin CTD 00001976	1990-02-01	0.0139797	0.0666243	0	0	11.8852	50.7514	IL1B;TNFSF10
TPEN CTD 00001994	3/253	0.0140026	0.0666243	0	0	6.39243	27.2862	CYTH4;IRF1;IL1B
mitoxantrone CTD 00006345	3/255	0.0142994	0.0677955	0	0	6.34106	26.9339	DUSP4;LBH;IL1B
curcumin BOSS	3/257	0.0145999	0.0689754	0	0	6.29049	26.5883	MMP13;IL1B;APLNR
ascorbic acid CTD 00005445	3/261	0.0152115	0.071612	0	0	6.1917	25.9166	CXCL10;IL1B;TNFSF10
digoxin PC3 UP	4/483	0.0154564	0.0724038	0	0	4.51891	18.8426	EFNA1;CD83;IRF1;PLEKHO2
methylene blue BOSS	1995-02-01	0.015488	0.0724038	0	0	11.2434	46.8588	TNFSF10;APLNR
cicloheximide HL60 UP	4/485	0.0156701	0.0729997	0	0	4.49965	18.7006	DUSP4;IL1B;TNFSF10;PDE4B
tretinoin MCF7 UP	1996-02-01	0.0157978	0.0733389	0	0	11.1232	46.1377	DUSP4;IRF1
hydrocortisone CTD 00006117	1997-02-01	0.0161101	0.0745303	0	0	11.0055	45.4342	IL1B;CCL4
vorinostat MCF7 DOWN	4/492	0.0164329	0.0757614	0	0	4.43352	18.215	DUSP4;EFNA1;BHLHE40;RASGRP1
alexidine MCF7 UP	1999-02-01	0.0167429	0.0761402	0	0	10.7775	44.0778	DUSP4;BHLHE40
rofecoxib CTD 00003631	1999-02-01	0.0167429	0.0761402	0	0	10.7775	44.0778	IL1B;MEOX2
okadaic acid CTD 00007275	1999-02-01	0.0167429	0.0761402	0	0	10.7775	44.0778	IL1B;TNFSF10
Toxoflavin TTD 00011503	1999-02-01	0.0167429	0.0761402	0	0	10.7775	44.0778	IL1B;TNFSF10
METHAMPHETAMINE CTD 00006286	2/101	0.0173861	0.0787974	0	0	10.5587	42.7849	IL1B;PDE4B
quercetin CTD 00006679	3158-12-01	0.0175354	0.0792055	0	0	2.29053	9.26183	DUSP4;EFNA1;CXCL10;FGF7;ESM1;CD83;LBH;MMP13;IL1B;BHLHE40;TNFSF10;ASB2
celastrol CTD 00002186	2/102	0.0177116	0.0797322	0	0	10.4526	42.161	IL1B;TNFSF10
azacitidine MCF7 UP	2/103	0.0180398	0.0806662	0	0	10.3486	41.5515	DUSP4;BHLHE40
phenol CTD 00007305	2/103	0.0180398	0.0806662	0	0	10.3486	41.5515	IL1B;BHLHE40
lycorine PC3 UP	4/508	0.0182637	0.0810605	0	0	4.28924	17.1691	DUSP4;ESM1;IL1B;PDE4B
phenoxybenzamine PC3 DOWN	2/104	0.0183705	0.0810605	0	0	10.2466	40.9559	DUSP4;IL1B
Doxorubicin Hydrochloride	2/104	0.0183705	0.0810605	0	0	10.2466	40.9559	IL1B;TNFSF10
beta-carotene CTD 00007253	2/104	0.0183705	0.0810605	0	0	10.2466	40.9559	IL1B;TNFSF10
nitric oxide CTD 00006402	2/105	0.0187038	0.08199	0	0	10.1467	40.3738	CXCL10;IL1B
Imatinib CTD 00003267	2/105	0.0187038	0.08199	0	0	10.1467	40.3738	CXCL10;IL1B
phenytoin CTD 00006527	2/109	0.0200624	0.0873729	0	0	9.76537	38.1719	DAPK2;IL1B
celecoxib BOSS	2/109	0.0200624	0.0873729	0	0	9.76537	38.1719	MMP13;IL1B
emetine PC3 UP	5/801	0.0209997	0.0907434	0	0	3.43934	13.287	EFNA1;IRF1;IL1B;BHLHE40;PDE4B
LITHOCHOLIC ACID CTD 00006221	2/115	0.0221757	0.0914864	0	0	9.24406	35.2084	EFNA1;IL1B
Healon BOSS	2/115	0.0221757	0.0914864	0	0	9.24406	35.2084	MMP13;IL1B
disulfiram CTD 00005860	2/116	0.0225366	0.0914864	0	0	9.16251	34.7499	IL1B;APLNR
celecoxib CTD 00003448	2/116	0.0225366	0.0914864	0	0	9.16251	34.7499	IL1B;TNFSF10
trichostatin A HL60 DOWN	4/543	0.0227017	0.0914864	0	0	4.0035	15.1545	CCL4;LMO2;BHLHE40;PDE4B
camptothecin CTD 00005566	2/117	0.0228999	0.0914864	0	0	9.08238	34.3007	IL1B;CCL4
mitomycin C CTD 00007136	3/308	0.0234853	0.0914864	0	0	5.22508	19.6013	DUSP4;IL1B;TNFSF10
Fulvestrant CTD 00002740	3/310	0.023882	0.0917537	0	0	5.19051	19.3846	EFNA1;CXCL10;IL1B
luteolin CTD 00007430	2/120	0.0240044	0.0919596	0	0	8.85013	33.0067	IL1B;TNFSF10
staurosporine TTD 00011086	2/121	0.0243774	0.0931216	0	0	8.77532	32.5924	DAPK2;TNFSF10
anisomycin HL60 UP	6/1142	0.0248642	0.0946497	0	0	2.92419	10.8029	DUSP4;CD83;IL1B;CCL4;PDE4B;RASGRP3
aspirin CTD 00005447	4/561	0.025221	0.0946497	0	0	3.87054	14.2439	CD274;IRF1;IL1B;TNFSF10
Irinotecan hydrochloride CTD 00002224	4/565	0.0258031	0.0947767	0	0	3.84215	14.0517	LBH;IL1B;TNFSF10;PDE4B
FLUOXETINE HYDROCHLORIDE BOSS	2/126	0.0262779	0.0955163	0	0	8.41935	30.6383	CD52;IL1B
vorinostat HL60 DOWN	4/569	0.0263933	0.0955163	0	0	3.81416	13.8631	CLEC7A;CCL4;LMO2;BHLHE40
proscillaridin HL60 UP	3/323	0.0265504	0.0955163	0	0	4.97635	18.0577	CD83;PDE4B;PLEKHO2
daidzein CTD 00000166	2/127	0.026665	0.0955163	0	0	8.35158	30.2695	DUSP4;IL1B
0297417-0002B PC3 UP	2/127	0.026665	0.0955163	0	0	8.35158	30.2695	IL33;BHLHE40
cycloheximide CTD 00005731	3/324	0.026762	0.0955163	0	0	4.9606	17.9612	MMP13;IL1B;TNFSF10
acetaldehyde CTD 00005293	2/129	0.0274463	0.0955163	0	0	8.21923	29.5524	IL1B;BHLHE40
digitoxigenin MCF7 UP	3/328	0.0276178	0.0955163	0	0	4.89854	17.5823	DUSP4;EFNA1;BHLHE40
DEOXYNIVALENOL CTD 00000341	2/130	0.0278404	0.0956879	0	0	8.15461	29.2038	IL1B;CCL4
NSC25485 CTD 00006443	2/130	0.0278404	0.0956879	0	0	8.15461	29.2038	IL1B;TNFSF10
4-Hydroxytamoxifen CTD 00000850	4/586	0.0289929	0.0979374	0	0	3.6995	13.0988	DUSP4;EFNA1;BHLHE40;RASGRP1
Agarose BOSS	2/133	0.0290364	0.0979374	0	0	7.96665	28.1956	MMP13;IL1B
trichostatin A MCF7 DOWN	4/588	0.0293086	0.0979374	0	0	3.68645	13.0127	DUSP4;EFNA1;BHLHE40;RASGRP1
isotretinoin HL60 UP	2/136	0.0302528	0.0996257	0	0	7.78712	27.2406	CYTH4;IRF1
methylergometrine HL60 UP	2/136	0.0302528	0.0996257	0	0	7.78712	27.2406	DUSP4;PDE4B
pyrvinium HL60 UP	2/137	0.0306628	0.100728	0	0	7.72904	26.9334	DUSP4;PDE4B
5-Fluorouracil CTD 00005987	6/1202	0.0309785	0.10087	0	0	2.76864	9.61953	CD274;CD52;FGF7;SOX18;IL1B;TNFSF10
daunorubicin PC3 UP	2/141	0.0323247	0.1029	0	0	7.50511	25.757	CD83;MMP13
thalidomide CTD 00006858	2/141	0.0323247	0.1029	0	0	7.50511	25.757	IL1B;TNFSF10
helveticoside MCF7 UP	3/355	0.0337757	0.105019	0	0	4.51658	15.3022	DUSP4;EFNA1;BHLHE40
daunorubicin CTD 00005752	2/146	0.0344513	0.106377	0	0	7.24269	24.3949	CCL4;TNFSF10
tonzonium bromide PC3 UP	2/146	0.0344513	0.106377	0	0	7.24269	24.3949	EFNA1;BHLHE40
wortmannin CTD 00000504	2/146	0.0344513	0.106377	0	0	7.24269	24.3949	FGF7;IL1B
amiodarone CTD 00005381	4/625	0.0355216	0.107693	0	0	3.46019	11.5488	DAPK2;IRF1;BHLHE40;TNFSF10
ibuprofen CTD 00006137	2/149	0.0357529	0.108148	0	0	7.09381	23.6304	CXCL10;IL1B
ETHYL METHANESULFONATE CTD 00005938	2315-09-01	0.0361694	0.109161	0	0	2.22262	7.37807	DUSP4;CD274;IRF1;CCL4;TNFSF10;PDE4B;PLEKHO2;CCR5;IFIT3
dmnq CTD 00002569	2/157	0.0393158	0.112319	0	0	6.72496	21.7628	BHLHE40;TNFSF10
cicloheximide PC3 UP	3/378	0.0395417	0.112723	0	0	4.23459	13.6794	EFNA1;IL1B;PDE4B
Sorafenib tosylate BOSS	2/160	0.0406856	0.113316	0	0	6.59627	21.1205	IL1B;TNFSF10
sanguinarine HL60 UP	3/384	0.0411238	0.113316	0	0	4.16663	13.2964	DUSP4;CD83;IFIT3
liothyronine CTD 00006943	2/162	0.0416088	0.114135	0	0	6.51316	20.7082	FGF7;IRF1
Adehl CTD 00006002	2/163	0.0420734	0.114135	0	0	6.47238	20.5067	IL1B;PDE4B
Medroxyprogesterone acetate CTD 00006623	3/389	0.0424666	0.114135	0	0	4.11161	12.9887	FGF7;IL1B;SIRPB1
strophanthidin PC3 DOWN	2/164	0.04254	0.114135	0	0	6.4321	20.3081	DUSP4;BHLHE40
cinnamaldehyde CTD 00000671	2/165	0.0430085	0.114135	0	0	6.39232	20.1125	CD274;IL1B
scriptaid MCF7 DOWN	4/670	0.0440451	0.115769	0	0	3.21889	10.0511	DUSP4;EFNA1;BHLHE40;RASGRP1
forskolin BOSS	2/168	0.0444258	0.115769	0	0	6.27584	19.5426	CD52;IL1B
arachidonic acid CTD 00007139	2/168	0.0444258	0.115769	0	0	6.27584	19.5426	MMP13;IL1B
staurosporine CTD 00007273	2/170	0.0453803	0.116431	0	0	6.2005	19.1762	DAPK2;TNFSF10
COBALT CTD 00005696	2/173	0.0468263	0.116431	0	0	6.0908	18.6458	IL1B;ASB2
parthenolide PC3 DOWN	2/174	0.0473121	0.117141	0	0	6.05508	18.474	DUSP4;BHLHE40
lanatoside C PC3 UP	3/411	0.0486363	0.118097	0	0	3.88553	11.7475	EFNA1;CD83;PLEKHO2
niclosamide HL60 UP	2/178	0.0492739	0.118915	0	0	5.91627	17.8101	CD83;PDE4B
dUTP BOSS	2/179	0.0497689	0.119761	0	0	5.88255	17.6498	MMP13;IL1B
Pentabromodiphenyl ether CTD 00003077	3/415	0.0498034	0.119761	0	0	3.84702	11.5398	DUSP4;CD83;BHLHE40

## Sheet: E
Term	Overlap	P-value	Adjusted P-value	Old P-value	Old Adjusted P-value	Odds Ratio	Combined Score	Genes
ZINC CTD 00007011	4/1642	0.00129399	0.0918672	0	0	14.941	99.358	SUCNR1;CYP24A1;PHLDA2;SAP30
3-methylcholanthrene CTD 00006310	2/297	0.00439354	0.0918672	0	0	26.7092	144.967	SLC22A23;CYP24A1
menadione CTD 00007386	3/1140	0.00543556	0.0918672	0	0	12.438	64.8616	SLC22A23;CYP24A1;PHLDA2
apigenin HL60 DOWN	2/396	0.00768868	0.0918672	0	0	19.8975	96.861	PHLDA2;SAP30
hydrogen peroxide CTD 00006118	2673-04-01	0.00795687	0.0918672	0	0	8.65443	41.8331	CYP24A1;ARHGEF39;PHLDA2;SAP30
TERT-BUTYL HYDROPEROXIDE CTD 00007349	3/1341	0.00857819	0.0918672	0	0	10.4568	49.7592	CYP24A1;PHLDA2;SAP30
piroxicam CTD 00006571	2/549	0.0144129	0.0969056	0	0	14.2201	60.288	PHLDA2;SAP30
Tamibarotene CTD 00002527	2/559	0.0149181	0.0969056	0	0	13.9576	58.6943	CYP24A1;SAP30
Irinotecan hydrochloride CTD 00002224	2/565	0.015225	0.0969056	0	0	13.8046	57.7698	ARHGEF39;PHLDA2
COUMESTROL CTD 00005717	3/1812	0.0196637	0.100234	0	0	7.53897	29.6205	SLC22A23;ARHGEF39;PHLDA2
calcitriol CTD 00005558	1958-03-01	0.0242447	0.106793	0	0	6.91995	25.7392	SLC22A23;CYP24A1;ARHGEF39
Copper sulfate CTD 00007279	6016-05-01	0.029107	0.11228	0	0	5.81517	20.567	SLC22A23;SUCNR1;CYP24A1;ARHGEF39;PHLDA2
Silica CTD 00006678	2/898	0.036384	0.117667	0	0	8.52545	28.2501	SUCNR1;ARHGEF39
estradiol CTD 00005920	4336-04-01	0.043879	0.129469	0	0	4.82025	15.0696	CYP24A1;ARHGEF39;EVPLL;PHLDA2

## Sheet: F
Term	Overlap	P-value	Adjusted P-value	Old P-value	Old Adjusted P-value	Odds Ratio	Combined Score	Genes
cinnamaldehyde CTD 00000671	2/165	0.00354326	0.271517	0	0	27.0293	152.518	LMCD1;SEL1L3
phenobarbital CTD 00006510	3/1129	0.0210403	0.271517	0	0	6.28208	24.2571	STAC2;LHFPL2;LMCD1
CADMIUM CTD 00005555	3/1142	0.0216896	0.271517	0	0	6.2061	23.7751	STAC2;SSTR2;LMCD1
testosterone enanthate CTD 00000155	2/533	0.0332491	0.271517	0	0	8.14313	27.717	MARCKS;TRIL
chlorhexidine PC3 DOWN	2/534	0.0333641	0.271517	0	0	8.1274	27.6354	MARCKS;SEL1L3
Fonofos CTD 00005884	2/712	0.0562591	0.283397	0	0	6.03412	17.3649	STAC2;SSTR2
TERBUFOS CTD 00000658	2/715	0.0566835	0.283397	0	0	6.00779	17.244	STAC2;SSTR2
metronidazole PC3 DOWN	2/745	0.0609928	0.283397	0	0	5.75624	16.1002	TRIL;LHFPL2
Retinoic acid CTD 00006918	4258-05-01	0.0638776	0.283397	0	0	3.08331	8.48154	TRIL;DDIT4L;LHFPL2;SSTR2;SEL1L3
parathion CTD 00006472	2/776	0.0655663	0.283397	0	0	5.5168	15.0316	STAC2;SSTR2
atrazine CTD 00005450	2968-04-01	0.0671278	0.283397	0	0	3.28224	8.86586	TRIL;LHFPL2;SSTR2;LMCD1
Silica CTD 00006678	2/898	0.0846686	0.285703	0	0	4.73537	11.6917	DDIT4L;SSTR2
calcitriol CTD 00005558	1958-03-01	0.0850861	0.285703	0	0	3.45921	8.5238	LHFPL2;LMCD1;IGSF9
cimetidine PC3 DOWN	2/953	0.093807	0.285703	0	0	4.44865	10.5278	MARCKS;SEL1L3
VALPROIC ACID CTD 00006977	8312-07-01	0.119675	0.301768	0	0	2.46201	5.22678	MARCKS;TRIL;DDIT4L;SSTR2;LMCD1;IGSF9;SEL1L3
latamoxef HL60 UP	2/1196	0.137422	0.317494	0	0	3.49805	6.94258	MARCKS;SSTR2
vincristine CTD 00006988	2/1245	0.146754	0.322873	0	0	3.35139	6.4313	MARCKS;SSTR2
testosterone CTD 00006844	2/1247	0.147138	0.322873	0	0	3.34565	6.41154	LHFPL2;IGSF9
camptothecin MCF7 DOWN	2/1513	0.200117	0.347748	0	0	2.71755	4.37214	LHFPL2;LMCD1
COPPER CTD 00005706	2/1688	0.236466	0.363212	0	0	2.41242	3.47859	MARCKS;SEL1L3
COUMESTROL CTD 00005717	2/1812	0.262642	0.392627	0	0	2.23192	2.984	MARCKS;LMCD1
progesterone CTD 00006624	1915-02-01	0.284532	0.408701	0	0	2.09979	2.63924	MARCKS;LMCD1
Tetradioxin CTD 00006848	3768-03-01	0.344109	0.446412	0	0	1.61594	1.72387	MARCKS;LMCD1;SEL1L3
METHYL METHANESULFONATE CTD 00006307	3864-03-01	0.360014	0.462119	0	0	1.56643	1.60029	MARCKS;SSTR2;SEL1L3
ETHYL METHANESULFONATE CTD 00005938	2315-02-01	0.369492	0.463676	0	0	1.69823	1.6908	SSTR2;SEL1L3
estradiol CTD 00005920	4336-03-01	0.43826	0.509044	0	0	1.35495	1.11776	MARCKS;LMCD1;IGSF9
benzo[a]pyrene CTD 00005488	4424-03-01	0.452723	0.520496	0	0	1.32052	1.04648	LHFPL2;LMCD1;SEL1L3

## Sheet: G
Term	Overlap	P-value	Adjusted P-value	Old P-value	Old Adjusted P-value	Odds Ratio	Combined Score	Genes
colforsin MCF7 UP	2/106	0.00242902	0.195071	0	0	31.8622	191.819	PDCD4;CPE
estradiol CTD 00005920	4336-08-01	0.00408958	0.195071	0	0	4.82378	26.5275	MRAS;RASGRF1;TRNP1;PDCD4;CPE;THRSP;ZCCHC18;ENO2
CHROMIUM CTD 00005668	2/148	0.00466906	0.195071	0	0	22.6484	121.549	ITIH3;CPE
Zinc acetate dihydrate CTD 00007284	2/149	0.00473069	0.195071	0	0	22.4932	120.421	PIK3IP1;PDCD4
oxygen CTD 00006454	3/524	0.00524714	0.195071	0	0	10.1893	53.4947	CPE;NETO2;ENO2
5-Fluorouracil CTD 00005987	4/1202	0.00799208	0.195071	0	0	6.27312	30.2948	MRAS;PDCD4;CPE;NETO2
diethylstilbestrol CTD 00005818	2/233	0.0112141	0.195071	0	0	14.2532	64.0054	PIK3IP1;ENO2
Fonofos CTD 00005884	3/712	0.012193	0.195071	0	0	7.41518	32.6779	RASGRF1;CPE;GPR83
TERBUFOS CTD 00000658	3/715	0.0123326	0.195071	0	0	7.38279	32.4511	RASGRF1;CPE;GPR83
parathion CTD 00006472	3/776	0.0153762	0.195071	0	0	6.77867	28.3005	RASGRF1;CPE;GPR83
cyclophosphamide CTD 00005734	2/280	0.0159054	0.195071	0	0	11.8153	48.9285	PDCD4;NETO2
Retinoic acid CTD 00006918	4258-07-01	0.0163393	0.195071	0	0	3.70148	15.2286	PIK3IP1;TRNP1;PDCD4;CPE;NETO2;ENO2;SYTL3
Zinc sulfate CTD 00007264	2/287	0.0166655	0.195071	0	0	11.5211	47.172	MRAS;RASGRF1
Allococaine CTD 00005697	2/290	0.016996	0.195071	0	0	11.3993	46.4496	NETO2;ENO2
5-azacytidine CTD 00005455	2/352	0.0244442	0.195071	0	0	9.35048	34.703	CPE;ENO2
apigenin HL60 DOWN	2/396	0.0304098	0.195071	0	0	8.28765	28.9487	PDCD4;NETO2
NICKEL CHLORIDE CTD 00001064	2/399	0.0308361	0.195071	0	0	8.22376	28.611	PIK3IP1;ENO2
cephaeline HL60 DOWN	2/411	0.0325653	0.195071	0	0	7.97759	27.3193	NETO2;ENO2
Tetradioxin CTD 00006848	3768-06-01	0.0335348	0.195071	0	0	3.23445	10.9815	MRAS;PEX11A;TRNP1;PDCD4;CPE;THRSP
diclofenac CTD 00005804	2/427	0.0349304	0.195071	0	0	7.67098	25.7315	MRAS;PDCD4
emetine HL60 DOWN	2/435	0.036138	0.196749	0	0	7.52617	24.99	NETO2;ENO2
progesterone CTD 00006624	1915-04-01	0.0383801	0.196749	0	0	3.78336	12.3346	MRAS;TRNP1;PDCD4;ZCCHC18

## Sheet: H
Term	Overlap	P-value	Adjusted P-value	Old P-value	Old Adjusted P-value	Odds Ratio	Combined Score	Genes
creatine BOSS	1967-03-01	1.58846e-05	0.0124853	0	0	77.8164	859.884	IGFBP1;ATP1B1;SERPINA5
PHOSPHINE BOSS	3/158	0.00020527	0.0363093	0	0	31.9839	271.581	IGFBP1;GDF15;ATP1B1
Inositol 1,4,5-triphosphate BOSS	1934-02-01	0.000290474	0.0363093	0	0	95.9279	781.236	IGFBP1;ATP1B1
Vandetanib CTD 00004046	1935-02-01	0.000307945	0.0363093	0	0	93.0163	752.092	IGFBP1;INSIG2
IRON BOSS	3/185	0.000326438	0.0363093	0	0	27.2019	218.357	IGFBP1;GDF15;ATP1B1
D-Norepinephrine d-bitartrate BOSS	3/190	0.000352983	0.0363093	0	0	26.4679	210.396	IGFBP1;GDF15;ATP1B1
Phetharbital BOSS	3/192	0.00036398	0.0363093	0	0	26.1852	207.345	IGFBP1;ATP1B1;SERPINA5
diazepam BOSS	3/193	0.00036956	0.0363093	0	0	26.0461	205.847	IGFBP1;ATP1B1;SERPINA5
mitotane CTD 00006344	1947-02-01	0.000556579	0.0486079	0	0	68.1709	510.853	SERPINE2;GDF15
gossypol PC3 UP	1958-02-01	0.000847044	0.0665777	0	0	54.75	387.288	GDF15;INSIG2
Orphenadrine hydrochloride BOSS	1964-02-01	0.00103038	0.0697524	0	0	49.4367	340.017	IGFBP1;ATP1B1
hycanthone MCF7 UP	1968-02-01	0.00116227	0.0697524	0	0	46.4312	313.754	GDF15;ATP1B1
scriptaid PC3 UP	4/664	0.00122674	0.0697524	0	0	10.6474	71.3736	SERPINE2;GDF15;INSIG2;DUSP14
trichostatin A HL60 UP	4/667	0.00124744	0.0697524	0	0	10.5976	70.8623	SERPINE2;INSIG2;ATP1B1;PKIG
estradiol CTD 00005920	4336-09-01	0.00144703	0.0697524	0	0	5.42801	35.4897	IGFBP1;SLC25A15;SERPINE2;GDF15;FAM89A;RARRES1;ATP1B1;PKIG;SERPINA5
MANGANESE BOSS	1982-02-01	0.00168419	0.0697524	0	0	38.2788	244.467	IGFBP1;ATP1B1
adenine CTD 00005317	1986-02-01	0.00185037	0.0697524	0	0	36.4487	229.349	GDF15;DUSP14
calcitriol CTD 00005558	1958-06-01	0.00200569	0.0697524	0	0	6.15881	38.2571	IGFBP1;SERPINE2;GDF15;INSIG2;RARRES1;ATP1B1
L-carnitine BOSS	1991-02-01	0.00206864	0.0697524	0	0	34.3924	212.575	IGFBP1;ATP1B1
DL-PHENYLALANINE BOSS	1996-02-01	0.00229856	0.0697524	0	0	32.5548	197.786	IGFBP1;ATP1B1
tetracycline BOSS	1996-02-01	0.00229856	0.0697524	0	0	32.5548	197.786	IGFBP1;ATP1B1
Gefitinib BOSS	1997-02-01	0.00234594	0.0697524	0	0	32.2105	195.037	IGFBP1;ATP1B1
ciclopirox PC3 UP	1998-02-01	0.00239377	0.0697524	0	0	31.8734	192.352	GDF15;INSIG2
33258 Hoechst BOSS	1999-02-01	0.00244207	0.0697524	0	0	31.5432	189.73	IGFBP1;ATP1B1
D-Sorbitol BOSS	2/100	0.00249083	0.0697524	0	0	31.2198	187.167	IGFBP1;ATP1B1
Hydroxyzine dihydrochloride BOSS	2/100	0.00249083	0.0697524	0	0	31.2198	187.167	IGFBP1;SERPINA5
myo-inositol BOSS	2/101	0.00254006	0.0697524	0	0	30.9029	184.662	IGFBP1;ATP1B1
lactose BOSS	2/102	0.00258974	0.0697524	0	0	30.5923	182.214	IGFBP1;ATP1B1
ciclopirox MCF7 UP	2/103	0.00263988	0.0697524	0	0	30.2879	179.82	GDF15;INSIG2
MAGNESIUM BOSS	2/105	0.00274153	0.0697524	0	0	29.6968	175.188	IGFBP1;ATP1B1
(2E,4E,6E,8E)-3,7-DIMETHYL-9-(2,6,6-TRIMETHYL-3-OXO-1-CYCLOHEXENYL)NONA-2,4,6,8-TETRAENOIC ACID CTD 00000070	2/107	0.00284501	0.0697524	0	0	29.1282	170.755	GDF15;RARRES1
beta-Levulose BOSS	2/112	0.00311169	0.0697524	0	0	27.7972	160.462	IGFBP1;ATP1B1
ETHYLENE GLYCOL BOSS	2/116	0.00333319	0.0697524	0	0	26.8165	152.956	IGFBP1;ATP1B1
cycloheximide BOSS	2/122	0.00367893	0.0697524	0	0	25.4679	142.751	IGFBP1;ATP1B1
ARSENIC BOSS	2/123	0.00373813	0.0697524	0	0	25.2562	141.161	IGFBP1;ATP1B1
SELENIUM BOSS	2/124	0.00379776	0.0697524	0	0	25.0479	139.601	IGFBP1;ATP1B1
FLUOXETINE HYDROCHLORIDE BOSS	2/126	0.00391838	0.0697524	0	0	24.6414	136.565	IGFBP1;ATP1B1
N-NITROSODIMETHYLAMINE CTD 00005845	2/126	0.00391838	0.0697524	0	0	24.6414	136.565	SERPINE2;SERPINA5
Oxotremorine BOSS	2/128	0.00404076	0.0697524	0	0	24.2479	133.638	IGFBP1;ATP1B1
AFLATOXIN B1 CTD 00007128	3081-07-01	0.00419269	0.0697524	0	0	4.81364	26.3518	IGFBP1;SERPINE2;GDF15;FAM89A;PKIG;SERPINA5;DUSP14
Agarose BOSS	2/133	0.00435448	0.0697524	0	0	23.3165	126.761	IGFBP1;ATP1B1
isoproterenol BOSS	2/133	0.00435448	0.0697524	0	0	23.3165	126.761	IGFBP1;ATP1B1
colchicine CTD 00005701	2/140	0.00481215	0.0697524	0	0	22.126	118.078	GDF15;DUSP14
docetaxel BOSS	2/142	0.00494684	0.0697524	0	0	21.8077	115.777	IGFBP1;GDF15
Deacetylchitin BOSS	2/143	0.00501484	0.0697524	0	0	21.6519	114.655	IGFBP1;ATP1B1
genistein BOSS	2/143	0.00501484	0.0697524	0	0	21.6519	114.655	IGFBP1;ATP1B1
Cylindrospermopsin CTD 00003136	3/483	0.00512948	0.0697524	0	0	10.1589	53.5651	GDF15;SERPINA5;DUSP14
nitrate BOSS	2/152	0.0056463	0.0697524	0	0	20.3436	105.314	ATP1B1;SERPINA5
N-NITROSODIETHYLAMINE CTD 00005817	2/157	0.00601214	0.0697524	0	0	19.6824	100.655	IGFBP1;GDF15
Pyruvic acid BOSS	2/158	0.00608659	0.0697524	0	0	19.5552	99.7643	IGFBP1;ATP1B1
oleic acid BOSS	2/159	0.00616146	0.0697524	0	0	19.4297	98.8863	IGFBP1;ATP1B1
oxygen CTD 00006454	3/524	0.00643262	0.0697524	0	0	9.33973	47.1318	IGFBP1;GDF15;INSIG2
DL-METHIONINE BOSS	2/167	0.00677567	0.0697524	0	0	18.4802	92.2978	IGFBP1;ATP1B1
GLYCOGEN BOSS	2/167	0.00677567	0.0697524	0	0	18.4802	92.2978	IGFBP1;ATP1B1
forskolin BOSS	2/168	0.00685434	0.0697524	0	0	18.3679	91.5251	IGFBP1;ATP1B1
5109870 MCF7 UP	2/171	0.00709287	0.0697524	0	0	18.0391	89.2697	GDF15;INSIG2
L-aspartic acid BOSS	2/173	0.00725398	0.0697524	0	0	17.8264	87.8163	IGFBP1;ATP1B1
ALDOSTERONE BOSS	2/176	0.00749876	0.0697524	0	0	17.5164	85.7078	IGFBP1;ATP1B1
dimethyl sulfoxide BOSS	2/177	0.00758118	0.0697524	0	0	17.4154	85.0234	IGFBP1;ATP1B1
4-aminobutyric acid BOSS	2/180	0.00783093	0.0697524	0	0	17.1193	83.0229	IGFBP1;ATP1B1
methotrexate BOSS	2/182	0.0079995	0.0697524	0	0	16.9274	81.7316	IGFBP1;ATP1B1
L-leucine BOSS	2/182	0.0079995	0.0697524	0	0	16.9274	81.7316	IGFBP1;ATP1B1
5,6-BENZOFLAVONE CTD 00007276	2/182	0.0079995	0.0697524	0	0	16.9274	81.7316	IGFBP1;GDF15
glycerol BOSS	2/183	0.0080844	0.0697524	0	0	16.833	81.0983	IGFBP1;ATP1B1
COPPER BOSS	2/184	0.00816971	0.0697524	0	0	16.7396	80.4729	IGFBP1;ATP1B1
Melatonin BOSS	2/184	0.00816971	0.0697524	0	0	16.7396	80.4729	IGFBP1;ATP1B1
L-proline BOSS	2/184	0.00816971	0.0697524	0	0	16.7396	80.4729	IGFBP1;ATP1B1
Decitabine CTD 00000750	5/1800	0.00817736	0.0697524	0	0	5.06685	24.3532	GDF15;INSIG2;RARRES1;ATP1B1;PKIG
sucrose BOSS	2/185	0.00825543	0.0697524	0	0	16.6473	79.8553	IGFBP1;ATP1B1
lactic acid BOSS	2/186	0.00834155	0.0697524	0	0	16.556	79.2455	IGFBP1;ATP1B1
L-alanine BOSS	2/186	0.00834155	0.0697524	0	0	16.556	79.2455	IGFBP1;ATP1B1
Ethylparaben BOSS	2/186	0.00834155	0.0697524	0	0	16.556	79.2455	IGFBP1;ATP1B1
D-Arginine BOSS	2/187	0.00842809	0.0697524	0	0	16.4657	78.6432	IGFBP1;ATP1B1
liothyronine BOSS	2/187	0.00842809	0.0697524	0	0	16.4657	78.6432	IGFBP1;ATP1B1
acetic acid BOSS	2/187	0.00842809	0.0697524	0	0	16.4657	78.6432	IGFBP1;ATP1B1
ZINC BOSS	2/187	0.00842809	0.0697524	0	0	16.4657	78.6432	IGFBP1;ATP1B1
ethanol BOSS	2/187	0.00842809	0.0697524	0	0	16.4657	78.6432	IGFBP1;ATP1B1
Quercetin dihydrate BOSS	2/187	0.00842809	0.0697524	0	0	16.4657	78.6432	IGFBP1;ATP1B1
Erythorbic acid BOSS	2/187	0.00842809	0.0697524	0	0	16.4657	78.6432	IGFBP1;ATP1B1
sodium chloride BOSS	2/187	0.00842809	0.0697524	0	0	16.4657	78.6432	IGFBP1;ATP1B1
D-glucose BOSS	2/188	0.00851504	0.0697524	0	0	16.3763	78.0484	IGFBP1;ATP1B1
hydrogen peroxide BOSS	2/189	0.00860239	0.0697524	0	0	16.2879	77.4608	IGFBP1;ATP1B1
L-glutamic acid BOSS	2/190	0.00869015	0.0697524	0	0	16.2005	76.8805	IGFBP1;ATP1B1
glutathione BOSS	2/190	0.00869015	0.0697524	0	0	16.2005	76.8805	IGFBP1;ATP1B1
L-glutamine BOSS	2/190	0.00869015	0.0697524	0	0	16.2005	76.8805	IGFBP1;ATP1B1
cholesterol BOSS	2/190	0.00869015	0.0697524	0	0	16.2005	76.8805	IGFBP1;ATP1B1
HEXACHLOROETHANE BOSS	2/190	0.00869015	0.0697524	0	0	16.2005	76.8805	IGFBP1;SERPINA5
4-Hydroxytamoxifen CTD 00000850	3/586	0.00875335	0.0697524	0	0	8.3199	39.4223	IGFBP1;SLC25A15;INSIG2
streptozocin BOSS	2/191	0.00877832	0.0697524	0	0	16.114	76.3072	IGFBP1;ATP1B1
nitric oxide BOSS	2/191	0.00877832	0.0697524	0	0	16.114	76.3072	IGFBP1;ATP1B1
N-Acetyl-L-cysteine BOSS	2/191	0.00877832	0.0697524	0	0	16.114	76.3072	IGFBP1;ATP1B1
serine BOSS	2/191	0.00877832	0.0697524	0	0	16.114	76.3072	IGFBP1;ATP1B1
phenoxybenzamine MCF7 UP	2/191	0.00877832	0.0697524	0	0	16.114	76.3072	SERPINE2;GDF15
1-Phosphatidyl-myo-inositol BOSS	2/192	0.00886689	0.0697524	0	0	16.0283	75.7408	IGFBP1;ATP1B1
ethisterone BOSS	2/193	0.00895587	0.0697524	0	0	15.9436	75.1813	IGFBP1;ATP1B1
DICHLOROMETHANE BOSS	2/193	0.00895587	0.0697524	0	0	15.9436	75.1813	IGFBP1;ATP1B1
cerivastatin BOSS	2/193	0.00895587	0.0697524	0	0	15.9436	75.1813	IGFBP1;SERPINA5
Simvastatin and niacin BOSS	2/193	0.00895587	0.0697524	0	0	15.9436	75.1813	IGFBP1;SERPINA5
furosemide BOSS	2/194	0.00904525	0.0697524	0	0	15.8598	74.6284	IGFBP1;ATP1B1
PIPERONYL BUTOXIDE BOSS	2/194	0.00904525	0.0697524	0	0	15.8598	74.6284	IGFBP1;ATP1B1
Aizen uranine BOSS	2/194	0.00904525	0.0697524	0	0	15.8598	74.6284	IGFBP1;ATP1B1
11-cis-Retinal BOSS	2/197	0.00931582	0.0697524	0	0	15.6134	73.009	IGFBP1;ATP1B1
tamoxifen BOSS	2/197	0.00931582	0.0697524	0	0	15.6134	73.009	IGFBP1;SERPINA5
cyclophosphamide BOSS	2/198	0.00940681	0.0697524	0	0	15.533	72.4818	IGFBP1;ATP1B1
Acetylcholine bromide BOSS	2/198	0.00940681	0.0697524	0	0	15.533	72.4818	IGFBP1;ATP1B1
Acid red 87 BOSS	2/198	0.00940681	0.0697524	0	0	15.533	72.4818	IGFBP1;ATP1B1
doxorubicin BOSS	2/200	0.00959001	0.069794	0	0	15.3745	71.4459	IGFBP1;ATP1B1
dopamine BOSS	2/200	0.00959001	0.069794	0	0	15.3745	71.4459	IGFBP1;ATP1B1
Capsaicin BOSS	2/202	0.00977481	0.0698454	0	0	15.2192	70.4338	IGFBP1;ATP1B1
latamoxef HL60 UP	4/1196	0.0102088	0.0718894	0	0	5.73307	26.2833	IGFBP1;LRTM1;RARRES1;PKIG
epinephrine BOSS	2/207	0.0102438	0.0718894	0	0	14.8443	68.0029	IGFBP1;ATP1B1
5-Fluorouracil CTD 00005987	4/1202	0.0103872	0.072251	0	0	5.70253	26.0445	SERPINE2;GDF15;SERPINA5;DUSP14
Alitretinoin CTD 00003402	2/212	0.0107227	0.0732872	0	0	14.4872	65.7051	GDF15;RARRES1
(-)-Epigallocatechin gallate BOSS	2/212	0.0107227	0.0732872	0	0	14.4872	65.7051	IGFBP1;ATP1B1
oxyphenbutazone BOSS	2/217	0.0112114	0.0759671	0	0	14.1467	63.5303	IGFBP1;ATP1B1
troglitazone CTD 00002415	3/651	0.0116594	0.0783273	0	0	7.46026	33.2104	IGFBP1;SERPINE2;GDF15
parthenolide MCF7 UP	2/223	0.0118108	0.0786722	0	0	13.7584	61.0701	GDF15;DUSP14
resveratrol BOSS	2/225	0.0120137	0.0793513	0	0	13.6337	60.284	IGFBP1;ATP1B1
Bisphenol A CTD 00000312	4/1262	0.012287	0.08048	0	0	5.41321	23.8139	IGFBP1;GDF15;RARRES1;ATP1B1
Tetradioxin CTD 00006848	3768-07-01	0.0130371	0.0839933	0	0	3.77453	16.3813	WFDC12;IGFBP1;SERPINE2;GDF15;FAM89A;RARRES1;SERPINA5
scriptaid MCF7 UP	3/688	0.0135374	0.0865072	0	0	7.0438	30.3045	SERPINE2;INSIG2;PKIG
cyclosporin A CTD 00007121	4825-08-01	0.0138869	0.0880252	0	0	3.59868	15.3909	IGFBP1;SLC25A15;SERPINE2;GDF15;INSIG2;FAM89A;ATP1B1;SERPINA5
Premarin CTD 00005926	2/265	0.0163908	0.0905454	0	0	11.5367	47.4278	SLC25A15;INSIG2
tolnaftate PC3 UP	2/266	0.0165079	0.0905454	0	0	11.4924	47.164	LRTM1;RARRES1
Vitinoin CTD 00007069	3/780	0.0189317	0.0909788	0	0	6.18018	24.5163	SLC25A15;GDF15;RARRES1
valproic acid HL60 UP	2/289	0.0192995	0.0909788	0	0	10.5591	41.6839	INSIG2;ATP1B1
sulfaguanidine PC3 UP	3/809	0.0208501	0.0936467	0	0	5.94882	23.0243	GDF15;LRTM1;NEURL1
cycloheximide CTD 00005731	2/324	0.023903	0.0968535	0	0	9.39465	35.0773	SERPINE2;GDF15
digitoxigenin MCF7 UP	2/328	0.0244556	0.0968535	0	0	9.27749	34.4278	GDF15;ATP1B1
anisomycin PC3 UP	3/899	0.0274788	0.0968535	0	0	5.32617	19.1441	SERPINE2;GDF15;DUSP14
helveticoside MCF7 UP	2/355	0.0283229	0.0985758	0	0	8.55611	30.4947	GDF15;ATP1B1
ZINC CTD 00007011	4/1642	0.0296682	0.0985758	0	0	4.07304	14.3276	SERPINE2;GDF15;RARRES1;SERPINA5
sanguinarine HL60 UP	2/384	0.0327351	0.0985758	0	0	7.89489	26.995	SERPINE2;ATP1B1
NICKEL CHLORIDE CTD 00001064	2/399	0.0351186	0.0994106	0	0	7.59078	25.4217	IGFBP1;GDF15
trichostatin A PC3 UP	2/415	0.0377347	0.102773	0	0	7.29074	23.893	SERPINE2;GDF15
vorinostat PC3 UP	2/416	0.0379007	0.102773	0	0	7.27276	23.8022	SERPINE2;DUSP14
Vorinostat CTD 00003560	2/425	0.0394076	0.103473	0	0	7.11475	23.0077	ATP1B1;DUSP14
diclofenac CTD 00005804	2/427	0.0397456	0.103473	0	0	7.08054	22.8366	IGFBP1;GDF15
MS-275 PC3 UP	2/431	0.040425	0.104316	0	0	7.01309	22.5001	SERPINE2;GDF15
sanguinarine HL60 DOWN	2/431	0.040425	0.104316	0	0	7.01309	22.5001	SLC25A15;INSIG2
carbamazepine CTD 00005574	2/436	0.0412807	0.105005	0	0	6.93052	22.0901	IGFBP1;SLC25A15
strophanthidin PC3 UP	2/459	0.0453061	0.107443	0	0	6.57398	20.3419	SERPINE2;DUSP14
progesterone CTD 00006624	1915-04-01	0.0484825	0.10919	0	0	3.43923	10.409	IGFBP1;GDF15;RARRES1;ATP1B1
Phorbol 12-myristate 13-acetate CTD 00006852	2/483	0.0496588	0.109997	0	0	6.23829	18.731	GDF15;RARRES1

## Sheet: I
Term	Overlap	P-value	Adjusted P-value	Old P-value	Old Adjusted P-value	Odds Ratio	Combined Score	Genes
caffeine CTD 00005556	5/115	5.09163e-07	0.000335539	0	0	39.253	568.795	SERPINA1;SMOX;APOC1;APOA2;APOA1
Tetradioxin CTD 00006848	17/3768	1.16596e-06	0.000384183	0	0	6.68324	91.3061	ARG2;SERPINA1;ALAS1;AMBP;AHSG;SMOX;HSPB8;FGG;WBP1L;NPM3;KLF15;TSKU;LRG1;APOC1;PIM3;SGK1;TNS1
Perfluorohexanesulfonic acid CTD 00004138	2027-03-01	7.02735e-06	0.001282	0	0	99.74	1183.48	ALAS1;APOA2;ANGPTL4
Perfluorononanoic acid CTD 00003375	2029-03-01	8.76236e-06	0.001282	0	0	92.0585	1072.02	ALAS1;APOA2;ANGPTL4
CYPROTERONE ACETATE CTD 00007179	1930-03-01	9.72684e-06	0.001282	0	0	88.6444	1023.01	APOA2;APOA1;KLK2
Perfluorooctanesulfonic acid CTD 00002876	1971-03-01	0.000131773	0.0121325	0	0	35.1247	313.819	ALAS1;APOA2;ANGPTL4
quercetin CTD 00006679	13/3158	0.000132246	0.0121325	0	0	4.63701	41.4124	ARG2;ALAS1;AHSG;SMOX;FGG;WBP1L;CDKAL1;KLK2;LRG1;APOC1;ANGPTL4;SGK1;TNS1
Perfluoroundecanoic acid CTD 00003373	2014-02-01	0.000170213	0.0121325	0	0	127.949	1110.4	APOA2;ANGPTL4
Pentadecafluorooctanoic acid CTD 00001078	4/203	0.000174285	0.0121325	0	0	16.5603	143.326	ARG2;APOA2;APOA1;ANGPTL4
cyclosporin A CTD 00007121	16/4825	0.000184105	0.0121325	0	0	4.20406	36.155	ARG2;AMBP;AHSG;SMOX;HSPB8;FGG;APOA2;WBP1L;APOA1;NPM3;KLF15;TSKU;LRG1;APOC1;SGK1;TNS1
trichostatin A PC3 UP	5/415	0.000248878	0.0133632	0	0	10.3722	86.0743	ARG2;ALAS1;SMOX;EPPK1;ANGPTL4
vorinostat PC3 UP	5/416	0.000251663	0.0133632	0	0	10.3465	85.7454	ARG2;ALAS1;SMOX;EPPK1;ANGPTL4
benzo[a]pyrene CTD 00005488	15/4424	0.000274439	0.0133632	0	0	4.07288	33.4008	ARG2;ALAS1;SMOX;HSPB8;FGG;WBP1L;APOA1;CDKAL1;TSKU;LRG1;APOC1;EPPK1;ANGPTL4;SGK1;TNS1
bezafibrate CTD 00005506	1992-03-01	0.000283893	0.0133632	0	0	26.8085	218.943	APOA2;PLIN4;APOA1
heme CTD 00006078	2019-02-01	0.000318469	0.0139914	0	0	90.2941	727.047	ALAS1;AMBP
strophanthidin PC3 UP	5/459	0.000395719	0.0162987	0	0	9.34591	73.2234	ARG2;SMOX;HSPB8;EPPK1;SGK1
AFLATOXIN B1 CTD 00007128	3081-12-01	0.000472195	0.0171011	0	0	4.13074	31.6337	ARG2;AMBP;AHSG;SMOX;HSPB8;APOC1;APOA2;APOA1;CDKAL1;SGK1;TSKU;TNS1
Perfluoroheptanoic acid CTD 00003374	2024-02-01	0.000511802	0.0171011	0	0	69.7552	528.575	APOA2;ANGPTL4
Go 7874 MRC	2024-02-01	0.000511802	0.0171011	0	0	69.7552	528.575	PIM3;SGK1
menadione PC3 UP	3/113	0.000519002	0.0171011	0	0	21.6676	163.885	ARG2;HSPB8;SGK1
clonidine CTD 00005689	2025-02-01	0.000555825	0.0174423	0	0	66.7191	500.063	APOA2;APOA1
1,4-chrysenequinone PC3 UP	3/119	0.000603569	0.0179962	0	0	20.5407	152.261	ARG2;HSPB8;SGK1
lycorine PC3 UP	5/508	0.000628091	0.0179962	0	0	8.4143	62.0371	ARG2;SMOX;EPPK1;ANGPTL4;SGK1
phenobarbital CTD 00006510	7/1129	0.000744787	0.0197885	0	0	5.60012	40.3344	ARG2;ALAS1;LRG1;AHSG;SMOX;PPP2R3A;TSKU
Copper sulfate CTD 00007279	17/6016	0.000750704	0.0197885	0	0	3.59971	25.8981	ARG2;SERPINA1;ALAS1;AMBP;AHSG;SMOX;HSPB8;FGG;APOA2;APOA1;KLK2;LRG1;APOC1;PIM3;ANGPTL4;SGK1;TNS1
Perfluorodecanoic acid CTD 00001721	1930-02-01	0.000802468	0.0203395	0	0	54.7912	390.542	APOA2;ANGPTL4
RO-3306 MRC	1932-02-01	0.000913416	0.0222941	0	0	51.1333	357.847	PIM3;SGK1
5-Fluorouracil CTD 00005987	7/1202	0.00107867	0.0247932	0	0	5.23766	35.7838	SMOX;HSPB8;FGG;APOC1;EPPK1;ANGPTL4;NPM3
HC toxin MCF7 UP	4/332	0.00111443	0.0247932	0	0	9.98171	67.8697	ARG2;ALAS1;EPPK1;SGK1
trichostatin A MCF7 UP	6/874	0.00112868	0.0247932	0	0	6.00251	40.7373	ARG2;ALAS1;EPPK1;PPP2R3A;ANGPTL4;SGK1
disulfiram HL60 UP	1937-02-01	0.00122119	0.0259249	0	0	43.8176	293.925	ALAS1;SGK1
phenoxybenzamine PC3 UP	3/154	0.00127338	0.0259249	0	0	15.7518	105.003	ARG2;HSPB8;EPPK1
anisomycin PC3 UP	6/899	0.00130564	0.0259249	0	0	5.82683	38.6964	ARG2;SMOX;HSPB8;EPPK1;ANGPTL4;SGK1
testosterone CTD 00006844	7/1247	0.00133755	0.0259249	0	0	5.03548	33.3194	SMOX;HSPB8;WBP1L;TMCC3;KLK2;SGK1;TSKU
2,6-Di-tert-butyl-4-methylphenol CTD 00005548	1940-02-01	0.00142652	0.0265617	0	0	40.3522	264.409	APOA2;APOA1
vorinostat MCF7 UP	5/613	0.0014569	0.0265617	0	0	6.92363	45.2213	ARG2;ALAS1;EPPK1;ANGPTL4;SGK1
BX-517 Analog (compound 7b) MRC	1942-02-01	0.00157194	0.0265617	0	0	38.3308	247.442	PIM3;SGK1
BIO (6-Bromoindirubin-3'-oxime) MRC	1942-02-01	0.00157194	0.0265617	0	0	38.3308	247.442	PIM3;SGK1
orciprenaline HL60 UP	1942-02-01	0.00157194	0.0265617	0	0	38.3308	247.442	SMOX;SGK1
atenolol CTD 00005448	1943-02-01	0.00164719	0.0271375	0	0	37.394	239.646	APOA2;APOA1
2,2',3,4,4',5,5'-HEPTACHLOROBIPHENYL CTD 00003812	1945-02-01	0.00180277	0.0286757	0	0	35.6512	225.259	SERPINA1;APOA1
metronidazole PC3 UP	7/1316	0.00182759	0.0286757	0	0	4.75248	29.9633	SERPINA1;AHSG;APOA2;APOA1;CDKAL1;KLK2;TNS1
scriptaid PC3 UP	5/664	0.00207063	0.0317336	0	0	6.37098	39.3721	ARG2;ALAS1;SMOX;EPPK1;ANGPTL4
oleic acid CTD 00007269	1951-02-01	0.00230975	0.0339893	0	0	31.2763	189.866	PLIN4;APOA1
HEXACHLOROETHANE BOSS	3/190	0.00232097	0.0339893	0	0	12.6963	77.0126	SERPINA1;FGG;APOA1
dinoprostone PC3 UP	1952-02-01	0.00240006	0.0341372	0	0	30.6492	184.884	SMOX;ANGPTL4
lanatoside C PC3 UP	4/411	0.00243467	0.0341372	0	0	8.01188	48.215	ARG2;EPPK1;ANGPTL4;SGK1
alprostadil PC3 UP	1953-02-01	0.00249203	0.0342135	0	0	30.0468	180.12	SMOX;ANGPTL4
RO-31-8220 MRC	1954-02-01	0.00258564	0.0347743	0	0	29.4675	175.561	PIM3;SGK1
nicotinic acid CTD 00006387	1955-02-01	0.0026809	0.0353342	0	0	28.91	171.194	AHSG;APOA1
alvespimycin MCF7 UP	1962-02-01	0.00339329	0.0438466	0	0	25.5282	145.152	ARG2;SGK1
orciprenaline PC3 UP	1963-02-01	0.00350152	0.044375	0	0	25.1084	141.977	ARG2;SMOX
15-delta prostaglandin J2 PC3 UP	1965-02-01	0.00372278	0.0462889	0	0	24.3089	135.967	HSPB8;ANGPTL4
corbadrine HL60 UP	1966-02-01	0.00383581	0.0468111	0	0	23.9279	133.12	SMOX;SGK1
Chromium(II) chloride CTD 00000877	1967-02-01	0.00395042	0.0473332	0	0	23.5586	130.372	APOA1;SGK1
quercetin HL60 UP	1970-02-01	0.00430376	0.0499172	0	0	22.5158	122.672	SMOX;SGK1
calcitriol CTD 00005558	1958-08-01	0.00431757	0.0499172	0	0	3.69682	20.1294	SMOX;HSPB8;WBP1L;TMCC3;KLK2;PPP2R3A;SGK1;TSKU
tretinoin HL60 UP	3/241	0.00453165	0.0514889	0	0	9.94992	53.6964	SMOX;ANGPTL4;TNS1
rosiglitazone PC3 UP	1973-02-01	0.00467124	0.0521753	0	0	21.5612	115.705	PPP2R3A;ANGPTL4
Caspan CTD 00000180	5/808	0.00481922	0.0524269	0	0	5.18951	27.6868	SERPINA1;FGG;APOC1;APOA2;APOA1
rapamycin CTD 00007350	3/247	0.00485287	0.0524269	0	0	9.7023	51.6956	SERPINA1;HSPB8;KLK2
tanespimycin PC3 UP	1980-02-01	0.00558306	0.057488	0	0	19.6193	101.785	ARG2;HSPB8
withaferin A PC3 UP	1980-02-01	0.00558306	0.057488	0	0	19.6193	101.785	ARG2;HSPB8
dinoprost HL60 UP	1980-02-01	0.00558306	0.057488	0	0	19.6193	101.785	SMOX;SGK1
dihydroergocristine HL60 UP	1982-02-01	0.0058574	0.059385	0	0	19.1269	98.3133	SMOX;SGK1
Staurosporine MRC	1983-02-01	0.00599686	0.0598777	0	0	18.8898	96.6502	PIM3;SGK1
staurosporine MCF7 UP	1984-02-01	0.00613783	0.0603706	0	0	18.6585	95.0332	EPPK1;NPM3
genistein CTD 00007324	6/1231	0.00627559	0.0608178	0	0	4.17373	21.1653	SERPINA1;SMOX;HSPB8;KLK2;SGK1;TSKU
nifedipine CTD 00006395	1986-02-01	0.0064243	0.0613568	0	0	18.2125	91.9304	APOA2;APOA1
puromycin PC3 UP	4/552	0.00694517	0.0653838	0	0	5.90754	29.3588	ARG2;SMOX;HSPB8;SGK1
PKR Inhibitor MRC	1992-02-01	0.00731969	0.0679391	0	0	16.9932	83.5586	PIM3;SGK1
zardaverine HL60 UP	1993-02-01	0.00747412	0.068409	0	0	16.8056	82.2853	SMOX;SGK1
NICKEL SULFATE CTD 00001417	4/576	0.00805035	0.0726737	0	0	5.65268	27.2575	ARG2;TMCC3;ANGPTL4;SGK1
ciclopirox PC3 UP	1998-02-01	0.00826832	0.0736328	0	0	15.9263	76.3717	ARG2;ANGPTL4
K252a MRC	2/101	0.00876232	0.0759786	0	0	15.4413	73.1502	PIM3;SGK1
PHA-767491 LINCS	2/101	0.00876232	0.0759786	0	0	15.4413	73.1502	PIM3;SGK1
astemizole PC3 UP	2/102	0.00892988	0.0764258	0	0	15.2862	72.1255	ARG2;SMOX
pergolide HL60 UP	3/312	0.00922966	0.0779788	0	0	7.63612	35.7777	SMOX;WBP1L;SGK1
MG-262 PC3 UP	3/320	0.00988654	0.0820889	0	0	7.44038	34.3491	ARG2;SMOX;HSPB8
OTSSP167 MRC	2/108	0.00996527	0.0820889	0	0	14.4165	66.4408	PIM3;SGK1
8-azaguanine PC3 UP	3/323	0.0101398	0.0824952	0	0	7.3695	33.8355	SMOX;ANGPTL4;SGK1
mifepristone CTD 00007083	3/334	0.0111007	0.0892117	0	0	7.1206	32.048	APOC1;PPP2R3A;SGK1
Pirinixic acid CTD 00000280	6/1402	0.011622	0.0922761	0	0	3.62907	16.167	ALAS1;APOA2;PLIN4;APOA1;ANGPTL4;TSKU
tetryzoline HL60 UP	2/119	0.011995	0.094104	0	0	13.0539	57.7409	SMOX;SGK1
CGP74514A LINCS	2/125	0.0131724	0.101299	0	0	12.4134	53.7454	PIM3;SGK1
valproic acid MCF7 UP	2/126	0.0133734	0.101299	0	0	12.3127	53.1228	ARG2;ALAS1
K-252a, Nocardiopsis sp. RBC	2/126	0.0133734	0.101299	0	0	12.3127	53.1228	PIM3;SGK1
co-dergocrine mesilate HL60 UP	2/132	0.0146072	0.107949	0	0	11.7408	49.6196	SMOX;SGK1
colchicine HL60 UP	2/132	0.0146072	0.107949	0	0	11.7408	49.6196	SMOX;SGK1
scriptaid MCF7 UP	4/688	0.0147427	0.107949	0	0	4.69981	19.8191	ARG2;ALAS1;EPPK1;ANGPTL4
cicloheximide PC3 UP	3/378	0.0154627	0.108403	0	0	6.27104	26.146	ARG2;SMOX;SGK1
ursodiol CTD 00006973	2/138	0.0158885	0.110216	0	0	11.2195	46.4728	FGG;APOA1
ACROLEIN CTD 00005313	2/139	0.0161066	0.110565	0	0	11.137	45.9794	SMOX;APOA1
Medroxyprogesterone acetate CTD 00006623	3/389	0.0166848	0.111064	0	0	6.08891	24.9235	SMOX;SGK1;TSKU
lomustine PC3 UP	2/149	0.0183583	0.116328	0	0	10.3741	41.4725	ARG2;HSPB8
rosiglitazone CTD 00003139	3/411	0.0192891	0.119659	0	0	5.75412	22.7185	FGG;PLIN4;TNS1
dexamethasone CTD 00005779	3/421	0.0205438	0.124626	0	0	5.61359	21.8099	SERPINA1;AHSG;SGK1
Vorinostat CTD 00003560	3/425	0.0210581	0.125021	0	0	5.55924	21.4613	ALAS1;KLK2;SGK1
MS-275 PC3 UP	3/431	0.021843	0.128522	0	0	5.47963	20.9534	SMOX;ANGPTL4;SGK1
primaquine PC3 UP	3/434	0.0222414	0.128571	0	0	5.44065	20.706	SERPINA1;SMOX;TNS1
bicalutamide CTD 00002279	2/170	0.0234911	0.134614	0	0	9.06777	34.0144	ARG2;KLK2
COBALT CTD 00005696	2/173	0.0242676	0.137865	0	0	8.90733	33.1229	ANGPTL4;SGK1
pregnenolone PC3 UP	3/456	0.025286	0.139232	0	0	5.1706	19.0149	SERPINA1;SMOX;TNS1
hemin BOSS	2/181	0.0263894	0.139232	0	0	8.5058	30.9168	ALAS1;AMBP
1,9-Pyrazoloanthrone CTD 00003948	2/181	0.0263894	0.139232	0	0	8.5058	30.9168	APOA1;SGK1
(-)-isoprenaline HL60 UP	2/182	0.0266598	0.139232	0	0	8.45812	30.6573	SMOX;SGK1
Prestwick-983 HL60 UP	2/189	0.0285843	0.139232	0	0	8.13863	28.932	SMOX;SGK1
ciglitazone CTD 00001835	2/190	0.0288637	0.139232	0	0	8.09493	28.6979	ANGPTL4;TNS1
cholesterol BOSS	2/190	0.0288637	0.139232	0	0	8.09493	28.6979	APOA2;APOA1
digitoxigenin PC3 UP	3/483	0.0293178	0.139232	0	0	4.873	17.1996	SMOX;EPPK1;SGK1
digoxin PC3 UP	3/483	0.0293178	0.139232	0	0	4.873	17.1996	SMOX;EPPK1;SGK1
fulvestrant MCF7 DOWN	2/197	0.0308503	0.139232	0	0	7.80158	27.1386	HSPB8;TSKU
Staurosporine, Streptomyces sp. RBC	2/197	0.0308503	0.139232	0	0	7.80158	27.1386	PIM3;SGK1
VALPROIC ACID CTD 00006977	17/8312	0.0319116	0.139232	0	0	2.17556	7.49434	ARG2;SERPINA1;HSPB8;FGG;APOA2;WBP1L;APOA1;SNX10;PPP2R3A;KLF15;GLB1L2;APOC1;TMCC3;EPPK1;ANGPTL4;SGK1;TNS1
irinotecan PC3 UP	3/501	0.0321861	0.139232	0	0	4.69253	16.1246	EPPK1;ANGPTL4;SGK1
parthenolide PC3 UP	2/203	0.0325956	0.139232	0	0	7.5664	25.9042	ARG2;SGK1
Sodium dichromate CTD 00000827	2/208	0.0340793	0.139232	0	0	7.38088	24.9405	SERPINA1;TNS1
Decitabine CTD 00000750	6/1800	0.0354238	0.139872	0	0	2.76345	9.23096	SERPINA1;HSPB8;APOC1;SNX10;ANGPTL4;SGK1
piperlongumine MCF7 UP	2/216	0.0365076	0.139872	0	0	7.10208	23.5096	ARG2;SGK1
Periodate-oxidized adenosine CTD 00001296	2/216	0.0365076	0.139872	0	0	7.10208	23.5096	ARG2;SMOX
0179445-0000 MCF7 DOWN	4/911	0.0366866	0.139872	0	0	3.50331	11.5796	WBP1L;EPPK1;PPP2R3A;SGK1
67526-95-8 CTD 00007263	4/953	0.0422179	0.144477	0	0	3.34089	10.5736	ARG2;SERPINA1;SNX10;SGK1
aspirin CTD 00005447	3/561	0.0427808	0.144577	0	0	4.17505	13.1584	SERPINA1;FGG;APOA1
quinpirole HL60 UP	2/245	0.0458472	0.14817	0	0	6.24533	19.2509	SMOX;SGK1
progesterone CTD 00006624	1915-06-01	0.0459358	0.14817	0	0	2.58055	7.94942	ARG2;HSPB8;SNX10;ANGPTL4;SGK1;GLB1L2
4-Hydroxytamoxifen CTD 00000850	3/586	0.0476582	0.14817	0	0	3.99087	12.147	SERPINA1;HSPB8;TSKU

## Sheet: J
Term	Overlap	P-value	Adjusted P-value	Old P-value	Old Adjusted P-value	Odds Ratio	Combined Score	Genes
valsartan CTD 00002971	1963-02-01	0.00144629	0.271999	0	0	40.8217	266.923	PPP1R3C;SLC25A32
zardaverine HL60 UP	1993-02-01	0.00311788	0.271999	0	0	27.3228	157.669	NT5E;PPFIBP1
tolazoline PC3 DOWN	2/153	0.00820869	0.271999	0	0	16.4164	78.8407	PPFIBP1;MDM1
histamine BOSS	2/180	0.0112109	0.271999	0	0	13.9073	62.4559	CCL17;KNG1
Tetradioxin CTD 00006848	3768-08-01	0.0113532	0.271999	0	0	3.45149	15.4566	NT5E;PPP1R3C;CCNG1;TMPRSS2;TAB3;SLC25A32;RGS9;KNG1
Prestwick-983 HL60 UP	2/189	0.0123044	0.271999	0	0	13.232	58.1915	NT5E;PPFIBP1
1-NITROPYRENE CTD 00001569	2/234	0.0184355	0.271999	0	0	10.6412	42.4953	NT5E;CCL17
Uranium acetate CTD 00000229	2/243	0.0197895	0.271999	0	0	10.2391	40.164	NT5E;ABCC8
quinpirole HL60 UP	2/245	0.0200959	0.271999	0	0	10.1538	39.6733	NT5E;PPFIBP1
URANIUM CTD 00006964	2/246	0.0202499	0.271999	0	0	10.1117	39.4315	NT5E;ABCC8
cyclopenthiazide PC3 DOWN	2/261	0.0226198	0.271999	0	0	9.51882	36.0662	PPFIBP1;MDM1
estradiol CTD 00005920	4336-08-01	0.0259536	0.271999	0	0	2.89353	10.5656	NT5E;PPP1R3C;REP15;CAB39L;CCNG1;TMPRSS2;SLC25A32;KNG1
thiostrepton HL60 DOWN	2/325	0.033932	0.271999	0	0	7.60797	25.7408	NT5E;MDM1
indomethacin CTD 00006147	2/335	0.0358657	0.271999	0	0	7.37575	24.5463	NT5E;KNG1
medrysone HL60 UP	2/341	0.0370464	0.271999	0	0	7.24299	23.8699	PPFIBP1;ABCC8
doxycycline HL60 UP	2/390	0.0472397	0.271999	0	0	6.3125	19.269	PPFIBP1;ABCC8
ETHYL METHANESULFONATE CTD 00005938	2315-05-01	0.0488639	0.271999	0	0	2.94239	8.88225	NT5E;CCNG1;TAB3;SLC25A32;MDM1
ellipticine PC3 DOWN	2/399	0.0492141	0.271999	0	0	6.16656	18.5711	PPFIBP1;MDM1
Dronabinol CTD 00006853	2/402	0.049879	0.271999	0	0	6.11937	18.3468	PPFIBP1;CCNG1

[truncated: 8 more sheets: K, L, M, N, O, P, DOWN, UP]
