# Supplementary material for: A cross-tissue transcriptomic approach decodes glucocorticoid receptor-dependent links to human metabolic phenotypes
Source: Research Square preprint supplement (doi:10.21203/rs.3.rs-6147414/v1), 2025-04-18
Supplement: Supplementary file 2 [file 5a577925e2b7f62921e2914c.xlsx]

## Sheet: Gene_list
Entrez_Gene_ID	Symbol	Probe_Id	Probe_Sequence	Chromosome	Probe_Coordinates	p.tissue	p.dex	p.interaction	fdr.tissue	fdr.dex	fdr.interaction
33	74048	4632428N05Rik	ILMN_2651297	CGTGTGTTCTTGTTTATTTGACATCTGTCTCCATATCAGTCTTGAAAGCC	10	59835069-59835118	5.21355e-20	3.23908e-06	0.321893	1.6262e-19	0.000152462	0.999997
53	319476	Lrtm1	ILMN_1241151	ATCTGAGTGAGCTTGATGTGTTCGATGCTCCTGTCCCATGTTTTATCTTC	14	29840989-29841038	4.59785e-49	0.054583	7.20939e-05	7.96158e-48	0.37335	0.00435265
59	18150	Npm3	ILMN_3020829	CACCTCTTCTGACCCACCTAACCCAGATTCAGTCCCCAGCACTGCAAAAA	19	45822337-45822386	1.05478e-30	2.0175e-06	6.88256e-07	5.22383e-30	0.000100059	7.81076e-05
121	56508	Rapgef4	ILMN_2945940	GTACGGTACTACAGGAGCCAGCCCTTCAATCCGGATGCCGCTCAAGCTAA	2	72091024-72091051:72094306-72094327	1.53141e-40	1.26541e-05	0.0385585	1.33998e-39	0.000506271	0.495451
198	244152	Tsku	ILMN_2838564	CACAAGCTCCAAGGGACTTACAAGCTCAAGGGCCAGAGCCCAGAGACCCA	7	98226281-98226330	7.60177e-32	0.0026805	4.40268e-05	3.98952e-31	0.0476918	0.00282376
274	16819	Lcn2	ILMN_2712075	GTGGCCACCACGGACTACAACCAGTTCGCCATGGTATTTTTCCGAAAGAC	2	32241263-32241312	1.34836e-37	3.03022e-11	0.00115956	9.6913e-37	5.04454e-09	0.0413107
289	72999	Insig2	ILMN_1216822	GTCCGTTCTTGGTTGCCATGTATATTTTTTGCTGGAGGCATAACGATGGG	1	123203465-123203514	9.61117e-47	7.82092e-06	3.96174e-05	1.35409e-45	0.000332837	0.00257747
290	72999	Insig2	ILMN_1234858	GTCTGTTTATGTGAGCTGGACTAGCTTGCTTTCCTGACATCTCTGCTTCC	1	123229087-123229136	1.33869e-49	1.25313e-06	1.16838e-09	2.44622e-48	6.598e-05	3.28606e-07
306	81879	Tfcp2l1	ILMN_2769832	GGTAGTCCAGACTGGTCAAATATGTGTGGCAGGTCACGGGAAAGGGAGTC	1	120581559-120581608	8.63925e-63	2.49902e-09	4.54124e-09	9.65911e-61	2.80095e-07	1.07661e-06
339	76969	Chst1	ILMN_1255385	GTCTGAGTCTTGTGGCTACCCCTAGACCAGTAATGGCTAATGAATCTTAG	2	92455224-92455273	1.32739e-59	4.71437e-05	1.4011e-15	8.83902e-58	0.00156849	2.7584e-12
416	66995	Zcchc18	ILMN_2649172	CCCCTTGGTGAATGTCCTGCGTATTTCCCTGTACCTGTGTGCCTCGGTAT	X	133530699-133530748	9.79967e-75	1.05068e-10	6.04362e-09	2.46522e-71	1.57016e-08	1.37542e-06
454		Nhsl2	ILMN_2420209	AACCCAGATCCAGTTGTCTCCGTACCTTGTCACTCTGAGCAGATCTACCC			3.07821e-29	7.52949e-10	1.64909e-05	1.41881e-28	9.66641e-08	0.00123835
516		Mbd1	ILMN_2543657	AAGGCAAGCATTTGGTTTCCGGTTCCGGGAGTAAGCAACCGCCGCAGAGG			1.01271e-18	5.50825e-21	6.09197e-11	3.00621e-18	6.08339e-18	2.3987e-08
595		4930523C07Rik	ILMN_1253602	GCAGCTATGTGTCCCGTATCAGTGCCCCAAGCATGGACAGCAGTTTCTGG			4.02498e-52	8.36915e-07	3.01064e-08	9.36562e-51	4.71348e-05	5.21792e-06
646	270152	Amica1	ILMN_3160218	GGCTGGTGAGGATGGGGAGCAGCCTGGTCTGCCTTGTGCTTTCAAGCTTT	9	44915794-44915843	5.626e-29	1.37869e-10	1.03991e-05	2.55851e-28	2.04014e-08	0.000840861
669	319613	Sybu	ILMN_3130719	GCCCCTGCCGTGTTGTCTGAGGTGCCCGTTCTTATACTAATGGTTCAGGA	15	44503818-44503867	4.61166e-54	5.09516e-08	1.08149e-11	1.3481e-52	4.00545e-06	5.4412e-09
696	13088	Cyp2b10	ILMN_2594926	GAGCCTCTGAGAGACCTGCTGGAAATCAGTACTCCTATTGCATGTCTCCA	7	26711322-26711371	3.11158e-48	8.34899e-11	6.78198e-08	4.95936e-47	1.2772e-08	1.07376e-05
750	72388	Ripk4	ILMN_2840856	GAATGTGGGCAGAGGTGGCCATTGGAGATTGTTGTACTCTGAGGAGTCAG	16	97897138-97897187	4.61347e-63	6.69088e-09	6.32586e-06	5.483e-61	6.73266e-07	0.000554045
854	242864	Napepld	ILMN_2618526	CATTTAAAGTCAGCTTGAGGAAAACCGGGCAAGCGTCGGCTCTCCACTGC			7.83609e-50	1.29172e-05	1.50141e-05	1.46501e-48	0.000513975	0.00114261
917	67072	Cdc37l1	ILMN_2673926	GCAGCCTGTGACAGTTCAGAATCATGTCCCCCATTCTGGTGTTGGATGCA	19	29086468-29086517	1.14725e-16	6.74614e-23	0.000662201	3.15431e-16	1.2728e-19	0.0266062
918	67072	Cdc37l1	ILMN_2749686	CAGCCGATGGGGCACCTAACCCTGTGGAAATGGACTGGAATTGTTGAATC	19	29091907-29091956	2.08361e-26	2.49181e-24	1.4896e-08	8.42468e-26	7.05196e-21	2.85674e-06
919	67072	Cdc37l1	ILMN_1242724	TGGAAATGGCCAAAAACTGCAATGTGGATCCAAGAGGCTGTTTTCGTTTG	19	29082118-29082167	2.54081e-05	2.67401e-06	0.137539	4.45552e-05	0.000128948	0.930093
921	19260	Ptpn22	ILMN_1220975	CCTCACCAAGCAAGCCTACAGAACGTGTTCAGCCAAAAAATTCCAGCTCC	3	103689712-103689761	1.17998e-31	1.61762e-06	7.2591e-05	6.13582e-31	8.2402e-05	0.00437682
1049	240168	Rasgrp3	ILMN_2908687	GCTGGCAAACCCTCTAAAAACACCCAGAAGGAAACCTTAGGGAAGGCTGG	17	75433908-75433957	4.93027e-33	1.82006e-13	0.0188723	2.75887e-32	4.57856e-11	0.32284
1081	15959	Ifit3	ILMN_1230458	CAGGGAAGGAAGTATGTCCAGTCATATGGAAGACAGGGTGTGCAACCAGG			7.51827e-23	8.28584e-07	0.293529	2.63393e-22	4.68989e-05	0.999997
1094	11852	Rhob	ILMN_1215212	GTGTAGCATACGCAGTTTTGGTAAAGGAAGGCAACAGGTATTGGGGTCTA	12	8504732-8504781	3.12441e-22	4.97684e-12	0.168942	1.06389e-21	9.7981e-10	0.999997
1364	73284	Ddit4l	ILMN_2695819	TGGTGAGGCTTCTCAGGCATGGACATAGATCTTTTACCCGTTAGCAGTTC	3	137291136-137291185	2.88831e-65	6.26948e-08	2.99986e-10	5.25244e-63	4.78732e-06	9.98797e-08
1487		9330177P18Rik	ILMN_1227526	CTCCGGCATTATGTGAAGGCGGTGACCTTTCTTAGGCCCTTTGTGCCATG			1.19329e-39	1.9442e-05	7.14867e-07	9.80285e-39	0.000730585	7.99257e-05
1575		Fga	ILMN_2624363	CGAAGTGCTTACCAGGCACGCTGCACCCGTTTCCTAACCTCCTTTAGTGT			2.55369e-61	3.02931e-08	8.67531e-08	2.25847e-59	2.58324e-06	1.3138e-05
1611	192200	Wfdc12	ILMN_2948296	GGATCTCTGGGCACCTTGATCTTGGACTCCCCAACCTCCAGAACTCTGAG	2	164015251-164015300	7.06357e-33	2.77261e-05	2.77689e-11	3.9168e-32	0.000995611	1.23275e-08
1722	13803	Enc1	ILMN_1237886	CTAGGCATTTGGGCTTGCTACTTGACCATTCTCGCCCTGTGAAATGTCCC	13	98022564-98022613	2.1164e-40	1.10004e-11	2.89304e-12	1.83167e-39	2.00044e-09	1.95522e-09
1802		Lpin1	ILMN_2507725	GGCTTGGGAACCTAGTTTTGATATACCTTAAACTTCCCTGTCACTCTACC			1.2255e-34	3.9816e-11	0.00941709	7.48072e-34	6.43896e-09	0.201234
1879	77125	Il33	ILMN_1259747	CAATAGCTGGAGGAATGTATGATCAAAGAGGCCGGGAACCGCCGTGTAGG	19	30034954-30035003	3.32121e-38	2.78418e-09	5.11589e-05	2.4837e-37	3.05255e-07	0.00322636
2084	53945	Slc40a1	ILMN_2747923	GGAGACTGACTGCCATGCATTGCTGTGAGCACTTTCTTTGTCGTTCAGTT	1	45965104-45965153	9.01004e-48	9.73718e-08	0.000146368	1.38159e-46	7.07719e-06	0.00782489
2146	11812	Apoc1	ILMN_1228469	GCCCAGGCGGCCCCGGATTTGTCCGGAACATTGGAGAGCATACCGGATAA	7	20277323-20277372	1.07791e-56	0.00100664	1.92597e-09	4.56584e-55	0.0214401	5.12998e-07
2147	11812	Apoc1	ILMN_2599794	AAAGTGAAGGAGAAGTTGAAGACCACGTTCTCCTGAGCACCTGGCGGGCC	7	20274910-20274924:20274925-20274959	1.17784e-51	4.26974e-05	3.17131e-11	2.63636e-50	0.00144175	1.36762e-08
2202		Serpine2	ILMN_1246808	GTGGAATGCTGGATGCCTGGGATGCTGTAGTGAAGGATGAGCAGGCCGGT			4.65839e-56	1.95627e-08	4.28091e-06	1.77109e-54	1.75063e-06	0.000393992
2282	382384	Odf3l2	ILMN_2783833	GTGTCCCTTTCCCTGGCTGGACATGGAGCCGTGTGTCCTAGAATTCAGTG	10	79042775-79042824	1.84644e-38	8.8584e-05	4.67281e-10	1.40589e-37	0.0027176	1.49007e-07
2435	20648	Snta1	ILMN_2734142	TCCTGGAGGCCTCTAAGCCACCCTGAGATCTCTGCAGCTGGAGTCTTCTG	2	154202191-154202240	2.45489e-40	1.8657e-14	1.07186e-05	2.11652e-39	6.07775e-12	0.000863608
2452	624219	Gm6484	ILMN_2996704	GGAGGGCTGGAAAAAGACACGAGCCCCCTTATGCCCACACACCCCACAAT	9	21641720-21641769	7.13305e-46	0.000207583	0.000323603	9.32693e-45	0.00567263	0.014998
2509	73176	3110040M04Rik	ILMN_1219011	CCGTCTTGGTCACATCCTGACTTGTAATGCTTCATCGTGGTTTTCAGTAT	1	153052851-153052900	1.22919e-44	0.0773204	1.71152e-09	1.45362e-43	0.449376	4.61307e-07
2576	108956	Apol7c	ILMN_2614563	GTCAGACTTTGGTTGTGAAAATCATTTCCTGTTCTTGGTTTTGGGTAGTC			4.35394e-17	0.000192713	4.21453e-05	1.21638e-16	0.00533715	0.00272626
2598		Gnmt	ILMN_1238783	GAGGTTAGCGCTCCCTTCTGGCCGTGGAGGGCACTGTACTCACATGTACT			3.48205e-53	1.56922e-11	3.16073e-06	9.14563e-52	2.77561e-09	0.000303223
2875	11806	Apoa1	ILMN_2623393	TACCACACCAGGGCCAAAACCCACCTGAAGACACTTGGCGAGAAAGCCAG	9	46038327-46038376	9.67725e-51	3.41526e-09	3.23502e-08	1.99816e-49	3.64732e-07	5.54868e-06
2886	20717	Serpina3m	ILMN_2728473	CCTCTTTATGGCCAAAGTCACTAACCCCAAGTGAACCTAAAGCTCCCCAA	12	105632103-105632137:105632138-105632152	3.14901e-59	1.06524e-21	9.89808e-13	1.96948e-57	1.26935e-18	7.67988e-10
2917	217154	Stac2	ILMN_2703563	CGAGAGGACACTGATTCTCTACCCAACACACCTTGCCCCATTTTCCCCCT			1.37505e-38	0.000448175	1.87691e-13	1.05657e-37	0.0109547	2.09748e-10
3045		LOC381739	ILMN_1222598	CCAAACTCTGGGTTCATGGGCACGCATCCTTGCATCCTTGTACCTGGCCA			9.08125e-48	7.7433e-13	2.80462e-09	1.39204e-46	1.67759e-10	7.05533e-07
3070	103161	Apof	ILMN_2644185	TTTACACTCTAATGGGGCTGGCTAACTTCCACCTGAACAAGTGATTATAG	10	127707137-127707186	6.4866e-67	6.55106e-05	6.4889e-13	1.57425e-64	0.00207295	5.76125e-10
3106	13096	Cyp2c37	ILMN_2691060	CTGTGATCACCCTGAGGCTTTAATTCACTGCTTTCCACACTGGACACACT	19	40086431-40086480	3.03478e-74	0.00128452	5.88484e-14	5.97468e-71	0.0261648	7.61347e-11
3107	13096	Cyp2c37	ILMN_2691059	TCTGTGATCACCCTGAGGCTTTAATTCACTGCTTTCCACACTGGACACAC	19	40086430-40086479	4.16507e-76	3.94084e-07	3.88692e-15	2.69426e-72	2.43258e-05	7.01444e-12
3206	72287	Plekhf1	ILMN_2993334	GCCAGATATCACCACCTGGCAACCGGGTCCTTCCAAACTGGACGCCAGAT	7	39005920-39005969	4.6333e-31	9.26798e-10	0.000122999	2.33475e-30	1.16573e-07	0.00675091
3336	53374	Chst3	ILMN_2864172	GGTGCAGCTACACAGCCACAACCTCTTTCTGTCATTGACCTTCTTGGTCT	10	59644632-59644681	3.60996e-50	0.000496095	1.31356e-06	7.00054e-49	0.0119044	0.000139337
3337	53374	Chst3	ILMN_2864170	CCAATGCCCGATTCTGCTGTTCTCATCTGAGAGCTGACAACCCAGCGCTC	10	59644560-59644609	2.8279e-52	1.31943e-06	2.08802e-09	6.7042e-51	6.90696e-05	5.43378e-07
3456	71982	Snx10	ILMN_2609614	GCAGCTGTGTGTAGAGTTTCAGAGCAAGTTCCTCAGCAGTGTAGATGAAT	6	51540451-51540500	6.3966e-35	2.05957e-06	7.67174e-05	3.971e-34	0.000102034	0.00457084
3741	268591	Serpina5	ILMN_2999329	GCTGAGGTGGTGTGATAGAGGTCTGTGGTAAACAGCAGAACTTAGGGTGC	12	104507086-104507135	3.64342e-32	0.000204104	4.50617e-07	1.94687e-31	0.00560124	5.39799e-05
3810	68404	Nrn1	ILMN_2699052	CTTCCACAGTACCTTGTTTTGATCATTTCCACTGCACATTTCTCCTCCAG	13	36817901-36817950	8.07189e-59	0.141485	3.9066e-05	4.76682e-57	0.589625	0.00255628
3865		Mef2c	ILMN_1220270	AGCACAGCTAATGACAAGTGCAGCTGATGGTACATCGCACTCACGCCCAC			1.60703e-28	8.33276e-06	1.51127e-05	7.14532e-28	0.000352631	0.00114626
3927	54150	Rdh7	ILMN_2871249	GGGGCTGGCAATATCCTGTGAACTTAGCTTCTTGGGGCTTCATCTTGGCC	10	127287282-127287331	8.24354e-68	0.00297301	4.79747e-12	2.61032e-65	0.0515568	2.7498e-09
3973		Neurl1a	ILMN_2625940	GCACTGCCTCCCTTGTGAACTGGGCCACTGTGTTTGTGAATAAAGGTGAT			1.34007e-60	0.021291	0.000103304	1.0462e-58	0.213146	0.00587649
4071	57435	Plin4	ILMN_2588249	CCTTAGTGTCTGCTTCACTCAAGCTGGTAGAACAGGCTACTCGCTGCACT	17	56240110-56240159	1.46916e-55	3.6798e-16	9.53122e-08	5.20539e-54	1.63358e-13	1.43383e-05
4190	17355	Aff1	ILMN_3154640	GCCTCATGGGAGACTCTGAAAGGGGGCAGACGTGATCTGTGAGAGTTTTT	5	104284100-104284149	1.26128e-38	1.03999e-23	0.000189279	9.71293e-38	2.47852e-20	0.00963003
4255	227627	Obp2a	ILMN_2695360	GCTTCCAACACCAAGCTGGGACATCCCTTCACCACACCTCTCCTGGACCA	2	25558718-25558767	2.42415e-25	1.39757e-05	1.2282e-08	9.40117e-25	0.000549812	2.44629e-06
4418	225341	Lims2	ILMN_1247916	CAGCCCTCAGCAAAGCCTGGTGTGTGAACTGCTTTTCCTGTTCCACCTGC			2.80265e-34	1.7772e-07	0.182197	1.67379e-33	1.21012e-05	0.999997
4419	225341	Lims2	ILMN_2738345	GCAGCCCGAGAGCCCTACTGCCTTCACTACTCAGGAGACCTCATAGAAAG			2.62859e-49	4.51243e-13	0.000233075	4.66765e-48	1.03196e-10	0.0114591
4560	12740	Cldn4	ILMN_1223949	TCTGAGTTCCCTCCCTTTGCCCATTTCAAGGACACCGGCCAGTCTGCGGA	5	135421157-135421206	1.06695e-45	0.000972411	2.71079e-12	1.37668e-44	0.0208484	1.85981e-09
4637	69539	Trnp1	ILMN_3119914	GATGTATCCTGATAGAGGGAAGGAGGCACATTTACTCCCACACCGCCCAG			3.07777e-55	1.11831e-06	1.04684e-08	1.03771e-53	5.97851e-05	2.1744e-06
4753	78787	Usp54	ILMN_2418324	CCATAGTCAGGATTCTGACCACGTCCTTAAGGGAAGCCCAACTGCCCAGG	14	21368389-21368438	1.22434e-43	5.72291e-26	1.5283e-08	1.34954e-42	2.09379e-22	2.89552e-06
4798	217847	Serpina10	ILMN_1259215	CTGTACCCAGCCTGCTCGCTGTGGCTGTTCCCTGATTAACACTGAAACTA	12	104854902-104854951	1.29063e-66	0.0310835	2.3656e-07	2.93674e-64	0.267939	3.15978e-05
4819	13447	Doc2b	ILMN_2930602	GCCAAGTGAATCTCCCGATGCATGGACTCTGGCTGTCCTCGACACGGACT	11	75582768-75582817	1.12244e-26	1.53282e-10	0.000749379	4.59581e-26	2.24621e-08	0.0293281
4820	13447	Doc2b	ILMN_2736478	GCAGCGCCACGAAACAATTTTTGTAATCTTGTCTGACCTTCCCAAAGGTG	11	75582661-75582710	9.57082e-25	1.49659e-08	2.33118e-06	3.61901e-24	1.38867e-06	0.000231487
5086	76574	Mfsd2a	ILMN_1225764	AGGGCTGCTACTGTGAATATGCCAAGGACTGACTGGGCCTAGCTCGGAAC	4	122624219-122624268	4.85241e-46	5.23786e-14	1.89908e-05	6.41899e-45	1.5401e-11	0.00138921
5111	227737	Fam129b	ILMN_2686975	GCCTTGGGGGTTTCCACCATCCTTCCAGATATGGTATGAAGAATCTATGC	2	32780686-32780735	4.63887e-49	4.75612e-12	7.50419e-09	8.02647e-48	9.40445e-10	1.61808e-06
5113	72750	Fam117b	ILMN_2600991	CAGCATTTCCAGTGATGATAAGTATTGTTGTGGACTGTGTCCCTGAACCT	1	60042076-60042125	2.55903e-17	1.91124e-20	0.000288702	7.20216e-17	1.84134e-17	0.0136744
5114	72750	Fam117b	ILMN_1245942	CTATCCTTGAAGTAACAGAGAGGGACAGGTTTCAGGTCAGCATCTGCTCC	1	60040743-60040792	2.35339e-16	4.30113e-17	0.0665067	6.39562e-16	2.26465e-14	0.673485
5149	17988	Ndrg1	ILMN_1250195	CCAGGATCTTGGAGTTGCTAGAGGAAAAGTAGTTATGCCCTATAGGCGGC	15	66761078-66761127	3.2437e-40	1.09324e-06	0.0541652	2.77337e-39	5.8792e-05	0.602507
5271		A530026G17	ILMN_2716126	CGGCGTACAATGGTTCCTGTCTTCATGGTCTTCACTAGCAGATTACACAG			9.1782e-37	5.51956e-17	8.32636e-05	6.30937e-36	2.80822e-14	0.00491559
5446	242297	Fam110b	ILMN_1239592	GGTGGGTCTGTCTGTGCATACACAGTTGTGAAGGTTGTGAGGTCTCCTTG	4	5726858-5726907	1.24216e-36	4.37691e-08	1.15809e-07	8.46827e-36	3.53912e-06	1.68276e-05
5463	20666	Sox11	ILMN_1235647	CAGTGGCTTGTGCTTTGTGCTTCAATCAAACCAGCTTCGTGACCGCCCTC	12	28020203-28020252	1.81893e-51	0.0848318	1.5819e-07	4.01183e-50	0.470284	2.20401e-05
5504	22113	Phlda2	ILMN_2425029	GGTGACGCCGCCGCTGCTCTTCACCGAAGATATTCCCGTGCTTGCTGAGC	7	150687590-150687639	3.25075e-50	7.88325e-09	3.80537e-12	6.34198e-49	7.72644e-07	2.29748e-09
5531	21753	Tes	ILMN_3084954	GGTGTTACCAGATGGATCCTCTCTTGTGCTACCTCTGAGCTTGCTGTAGA	6	17055625-17055674	3.70293e-42	4.35367e-11	2.93847e-07	3.65777e-41	6.96602e-09	3.81333e-05
5703	16326	Inhbe	ILMN_1229605	TCAGTAAAAAGGGGTGCTGAACTCGTAAGTTCTTAGGCTTCCCCCTCGAG	10	126786773-126786822	5.85497e-44	0.000638753	3.69876e-10	6.5819e-43	0.014787	1.21365e-07
5774	53376	Usp2	ILMN_1240264	CCACTATACAGCCTACTGCCGAAGTCCGGTTACAGGCGAATGGCACACTT	9	43901268-43901317	2.23631e-42	8.52885e-06	0.0943688	2.2423e-41	0.000359251	0.798266
6018	74030	Rin2	ILMN_3159720	CCTGTACAAGGCTTTTGTTGTCCCAGAACCCTCCCTTGGCACATGCTGGG	2	145578929-145578978	3.23247e-50	3.86537e-29	6.92669e-07	6.31176e-49	2.91713e-25	7.82163e-05
6086		Pex11a	ILMN_2452883	CTGGCCAGCAGGCGGGTCATGTCTACTAAGTGGAAATGAGAACTATGCAC			1.99347e-50	7.38819e-17	4.04854e-09	3.97649e-49	3.71716e-14	9.80332e-07
6096	65256	Asb2	ILMN_2765759	CAGGCTGCGAGGGAGACGCCCAGCCCAAGTATTTTATTTCACTGAGCACA	12	104559370-104559419	2.43534e-52	3.94932e-05	0.00102104	5.81617e-51	0.00134661	0.037558
6126	215418	Csrnp1	ILMN_2636403	GCAACTGGTGGCTCTTGAGAGCTCTTACGCCCTTCATTAGCTGATGTTGG	9	119880473-119880522	8.40607e-23	1.78593e-15	2.31598e-06	2.93949e-22	7.03205e-13	0.000230484
6209	668311	EG668311	ILMN_1244972	CCATCTGTGGTGGTCAAGGAAGAGACCCTAAACGGTGGGAACACTCCAGC	19	40905176-40905225	2.89598e-20	1.00535e-15	7.30251e-22	9.13118e-20	4.10119e-13	3.30665e-17
6248	171281	Acot3	ILMN_2644827	GCAGAAACTGCCGTTTTTCGGAAACTCAGTCTCCCAGCGAGCTGTAGTGC	12	85400146-85400195	1.76231e-38	0.000236491	1.89444e-05	1.3441e-37	0.00631402	0.00138806
6401	18008	Nes	ILMN_2703267	GGCCAGCACTCTTAGCTTTGATAACTTGACCTGTGGTATCTCTCGTGGAG	3	87784015-87784064	2.89574e-48	0.95388	8.9734e-11	4.62511e-47	0.992455	3.33053e-08
6625	546546	Serpina3h	ILMN_2889832	AAGCAGCTCCCCCTAGCACTCCTACTCAGAACAGAGAAGTAGCCTAACCC	12	105492461-105492510	5.50308e-21	4.56914e-17	4.12634e-07	1.78704e-20	2.37811e-14	5.02271e-05
6691	77853	Ppp2r3a	ILMN_2743780	ATGGGACATCCCATGGAAACCTCTCACTATACACACTCCGTCCCCTCTCT	9	101009396-101009445	6.22756e-38	3.01817e-10	0.0228199	4.57108e-37	4.24428e-08	0.361803
6721	67122	Nrarp	ILMN_2596979	CCGCCTGGCCATATTCTTCGGTCTTCTGCGCTTTTATGAACCAGTGTGGG	2	25038528-25038577	2.79655e-41	4.66359e-22	8.93986e-08	2.58114e-40	7.2818e-19	1.34935e-05
6905	54325	Elovl1	ILMN_2771824	GCTTGGGCCTCGAATCATGGCTAATCGGAAGCCCTTCCAACTTCGAGGCT	4	118103405-118103454	1.33698e-32	0.0037878	1.56724e-05	7.31422e-32	0.0622718	0.00118474
6917	66859	Slc16a9	ILMN_2922560	AACTAAAGCCTAACTCCAGCTCCAGGGGATCCGGCACCCTCTTCTGTCCC	10	69681116-69681165	5.90153e-47	1.30314e-13	2.05197e-06	8.4432e-46	3.40966e-11	0.000207864
6999		9330132O05Rik	ILMN_1227510	GAGTGCCTTGGTAGACGCTCTGGTGAGAGGGCAGGAAGACTTGGGTTTTG			8.47508e-30	0.0371976	2.33402e-08	4.01381e-29	0.298114	4.19393e-06
7055		Plk3	ILMN_2619330	ATAAGCCTGAGCCTTAGCTCCCAGCTAGGGGGCATTATTTATGGACCACT			6.80217e-44	2.56033e-05	9.12562e-16	7.61456e-43	0.0009312	1.9677e-12
7100	22416	Wnt3a	ILMN_1220516	CGTGGTGACTGACTGTCTTCTGCCTGGAACTTTGCGTTCGCGCTTGTAAC	11	59061667-59061716	1.39006e-43	0.00137668	7.63752e-13	1.52775e-42	0.0277056	6.65066e-10
7116	83672	Sytl3	ILMN_2725448	CTGTCTCACCCTGCCAAACCAACAAAAGCTGCGTGTGAAGTCCCCAGTCC	17	6940760-6940809	2.54874e-25	0.00399715	2.15249e-06	9.87167e-25	0.0647336	0.000216112
7237		Arrdc2	ILMN_1240671	CTTTCTTTTCGCGGGTTCGAGCACCTGGCCGATCTCTTTTTGGGTTCGCG			2.21789e-13	1.05233e-11	0.00180712	5.39153e-13	1.92917e-09	0.0589965
7394	107221	Ffar4	ILMN_2746895	CCTGCTTTAAAAATACCCGACTTCCAACAGCAGGCATCTACGGAGCCAGC	19	38188569-38188618	6.03442e-56	0.885796	5.3037e-18	2.26196e-54	0.982962	4.00261e-14
7482	103712	6330403K07Rik	ILMN_2594139	TGAGGGCTTTCCTTTGCTGCGGCCCATAGGAGGACTGTGCTAGAGAATTC			2.12998e-59	0.0162253	8.34426e-05	1.37194e-57	0.178534	0.00491974
7609	212892	Rsph4a	ILMN_1241366	CTGTGTATAAATACTGTGCATGTGCACGCATTCTCTTTCCTGGGTGAGTG	10	33635599-33635648	3.15248e-50	0.0004901	7.11056e-08	6.16354e-49	0.0117918	1.11796e-05
7816	14061	F2	ILMN_2789786	CTCATGGGGTGAAGGATGTGACCGGAAGGGGAAATACGGCTTCTACACGC	2	91465642-91465691	4.46275e-73	1.46508e-06	6.12156e-17	5.94346e-70	7.58173e-05	2.51991e-13
7907	219132	D14Ertd668e	ILMN_2827780	CCCCTGACAGTAAAAGCTGTTCCTCAGGAAAACTGGATGGGGCCTCCATG	14	58303077-58303126	7.60045e-38	2.04416e-05	2.22786e-10	5.5518e-37	0.000763081	7.47256e-08
7982	94181	Nans	ILMN_1245757	GGGCATGAACTCTTACCGAGGCTCACTGTCACATTCACTTTGTTCTTTGG	4	46516223-46516272	1.08954e-25	0.815412	2.94752e-07	4.28929e-25	0.967636	3.81333e-05
8028	56405	Dusp14	ILMN_2764309	GGGTGTTCGGGTTTAAGAGATGGGGAGGGGAAATACGTGCGTTGCCTGTG	11	83861960-83862009	6.80965e-35	0.779245	1.28784e-10	4.22047e-34	0.960623	4.62816e-08
8034	56644	Clec7a	ILMN_2653132	GTGCTGAGTCCACTGAATTGTTCTCTTGAAAATGATTGGGTTTATGTCAC	6	129411648-129411697	7.18787e-11	0.000124244	0.312699	1.59664e-10	0.00365318	0.999997
8081		Cd52	ILMN_2771380	TCATCTCTCAAAGCTGCTACAGAGCCCAGGAAGATTTCAGGATGAAGAGC			9.12011e-31	6.659e-06	0.428557	4.52915e-30	0.000289095	0.999997
8293	53608	Map3k6	ILMN_2947292	ATGGTATGCCGGATTTGGAGAGCCATCTTGGCACAGCGAGCAGGAGCCAC	4	132808572-132808621	6.42569e-24	6.06143e-21	0.290393	2.35007e-23	6.38297e-18	0.999997
8566	16369	Irs3	ILMN_2755312	CCCCTCACATGTTGGCAGCTAGATGTCATTGTGTCTCCTCAGCCAAAACA			2.97246e-38	6.26733e-12	1.47436e-17	2.22915e-37	1.21799e-09	7.41781e-14
8600		Rgs9	ILMN_1216553	GCCAGTGTGTGCTTGTCATCATCTCAGCAGTAGGGAGGCAGAGACAGGAG			1.8102e-34	2.31954e-05	2.57647e-08	1.09381e-33	0.000852481	4.5751e-06
8710	80888	Hspb8	ILMN_2761205	GGGAGGATGTGTGTGTCTTTGTTGTGTGAATTGTGCTGTTGTTTAGAGGG	5	116669543-116669592	9.61249e-54	5.60134e-05	0.0105586	2.72039e-52	0.00182209	0.218451
8755	76654	Upp2	ILMN_2517656	GCTTGCTGAAGCAGATCCAGAAGTGTATGTTAGGATGGTGTCAGCACTTC	2	58642912-58642961	2.09669e-70	1.65602e-05	8.43929e-13	1.26587e-67	0.00063494	7.08787e-10
8756	76654	Upp2	ILMN_2458185	GTCGCCTAGATGGGGCGTTATGCTCCTTTTCGAGAGAGAAAAAGCTAGAC	2	58632419-58632468	2.2768e-60	0.000159012	9.63154e-08	1.72113e-58	0.00450859	1.44413e-05
8757	76654	Upp2	ILMN_2462988	GGAGCCATGTGTTGTTCATAACATTCTTATGTAATTCCCATCCTTGGGCT	2	58642642-58642691	4.39303e-68	1.98039e-07	8.57335e-13	1.50698e-65	1.3285e-05	7.08787e-10
8958	13112	Cyp3a11	ILMN_2753183	GCAGGATGAGATCGATGAGGCTCTGCCCAACAAGGCACCTCCCACGTATG	5	146672098-146672114:146673923-146673955	2.95709e-64	0.000829239	4.42771e-08	4.39016e-62	0.0182719	7.344e-06
9032	66873	Tril	ILMN_2615431	TCTGCCTTGCCCAACTGTAGACTGTCACCAAAACCCTTTAATGCCTGGAC	6	53765563-53765612	2.53611e-50	4.34659e-10	8.45039e-10	5.00817e-49	5.87516e-08	2.48469e-07
9234	77590	Chst15	ILMN_1239627	CCTTCGCCTGTCATTTCCAGGACATATCTTACTGCCCCACACCAACCACG			7.32561e-25	5.60603e-09	0.130886	2.78094e-24	5.71727e-07	0.911794
9285	100041932	LOC100041932	ILMN_1218923	GAACTGATCGCACTCACCCAAGCCCTGAAAATGGCAGAAGGTAAGAAGCT	4	132655347-132655396	1.45248e-21	2.64266e-14	0.00116785	4.82784e-21	8.30987e-12	0.0415734
9396		Cdkal1	ILMN_2625114	GGCACCCACAAACTTTCAAACAAACCATGATCCTTTCCTGACACACCGAC			2.37468e-27	0.00547747	4.65134e-07	1.00147e-26	0.0818565	5.54256e-05
9408	23886	Gdf15	ILMN_2735350	CCCCGGTGGTTCTTATGCACAGGACAGACAGTGGTGTGTCACTGCAGACT	8	73153467-73153516	5.50991e-39	0.393297	8.91653e-12	4.35114e-38	0.825608	4.58806e-09
9474	27356	Insl6	ILMN_2677859	CTGTGTGATAGGATGCACCAAAGAAGAGATGGCCGTCGCGTGCCTCCCCT	19	29395938-29395987	2.80409e-42	9.88332e-22	2.70906e-13	2.79674e-41	1.20953e-18	2.83333e-10
9497	434083	Mug-ps1	ILMN_2774563	AGACATCCCAGTAAGGAACCTGCAGCCTGCCATTGTGAAAGTCTATGACT			1.51664e-61	4.75182e-05	7.57098e-10	1.393e-59	0.00157863	2.28548e-07
9618	56705	Ranbp9	ILMN_2689160	GTCAGGCTGCCATAGAGAGGATGATTCACTTTGGCCGAGAGCTACAAGCC	13	43507839-43507888	4.55805e-16	2.6395e-15	0.0710653	1.2259e-15	1.02153e-12	0.693678
9674	67072	Cdc37l1	ILMN_2918032	CCAGCATACAGGAGCGCTAGCTTTGGTTATTTTTGAGTGTGATTTTTGGC	19	29083223-29083272	1.76375e-14	6.09926e-10	0.00638235	4.47744e-14	8.02851e-08	0.153396
9691	22094	Tshb	ILMN_1215013	GTGACTGCATACACGAGGCTGTCAGAACCAACTACTGCACCAAGCCGCAG	3	102586576-102586625	3.55132e-70	0.408015	0.000182202	1.98528e-67	0.834345	0.00932236
9693	319880	Tmcc3	ILMN_2732604	ACTTTTAGGTCTAATCAAATGGTGGCAAGAGTAGTGGGAGCTCTTGACCC	10	94050745-94050794	1.48528e-15	9.97968e-05	0.000111233	3.92133e-15	0.00302065	0.00625682
9881	16427	Itih4	ILMN_2718431	CACCTTATGCCAACAGGGACGCCTGTGAGGCCGAGACCTTGATGGGAAGA	14	31714944-31714993	1.93948e-57	4.04522e-05	4.22768e-05	9.20562e-56	0.00137413	0.00273087
9912		Sstr2	ILMN_1229577	GGTGGACAGTTACCACAACGCTGAACCTGAAGAAAAGGACTCGCCACGTC			1.1506e-34	4.15972e-08	3.47856e-11	7.03295e-34	3.3877e-06	1.47208e-08
10047	17837	Mug2	ILMN_2793806	TGAGACAGATGAAGTGGCTTATGCTGAATACAGCAGTCCCTGCAGCTCAG	6	122050034-122050038:122051087-122051128:122051443-122051445	3.8491e-79	1.01251e-06	9.57062e-16	1.74291e-74	5.52378e-05	1.96985e-12
10465	17840	Mup1	ILMN_2875730	CCCGAGAATGAAGAATGGCCTGAGCCTCCAGTGTTGAGTGGAGACTTCTC	4	60511117-60511136:60511928-60511947:60511948-60511957	1.60318e-39	5.94409e-06	1.38577e-06	1.30728e-38	0.000262078	0.000145589
10861	18569	Pdcd4	ILMN_2778122	GAGTGAAGCTACTAAACCCCATGTTGGCTGCTGCTGTGGAAATGCTGTGC	19	54004060-54004109	5.18953e-18	0.0154048	2.22437e-05	1.49874e-17	0.172361	0.00157624
10918	20704	Serpina1e	ILMN_1220234	TTACAAGGCGGTTTTTTGTCTATGCCCCCTATCTTGCACTTCAACCGCCC	12	105185306-105185355	3.12735e-49	1.07072e-06	7.82107e-08	5.4994e-48	5.7718e-05	1.20458e-05
10974	16886	Limk2	ILMN_2636169	TGAGTATGCTTGCACTGTCCCCAGCAAGTGTGGGAGTGGGGCCTGCACTA	11	3244299-3244348	1.28748e-31	3.8456e-06	2.32106e-12	6.68021e-31	0.000177505	1.61692e-09
11051	74513	Neto2	ILMN_1245531	GATTGGTTTACTGGCTCAAAAAGCCTCCAAGCTAATGATGAGGGTGCACG	8	88160773-88160822	5.56076e-40	3.25736e-05	4.90201e-12	4.68546e-39	0.00114497	2.7746e-09
11111	20702	Serpina1c	ILMN_3004600	CCAAGTTCCTGCTAAAGAGGCCCAGAAGGTTAGCCCAGATCCACTTCCCC	12|NT_114988.1	25615-25642:26522-26543	5.57826e-61	1.78643e-06	1.14309e-08	4.61772e-59	9.00793e-05	2.31074e-06
11251	20927	Abcc8	ILMN_2645526	GGGCCTTCGTGAGAAAGACCAGCATCTTCATCATGGACGAAGCAACTGCC	7	53361196-53361245	2.07779e-43	1.79839e-06	1.31895e-11	2.2573e-42	9.0546e-05	6.49167e-09
11286	77976	Nuak1	ILMN_1227458	CCTGGTGCTCTTTACCAAAGGAGCTCGCTGCAGGGTGAAATTCAGGCGTG	10	83834183-83834232	1.12401e-31	7.51099e-21	3.20916e-09	5.85084e-31	7.72966e-18	7.89749e-07
11337	100048461	Clec7a	ILMN_1239843	GCCTTTCCCGCAATCAGAGTGAAGGGCCATGGTTCTGGGAGGATGGATCA			1.22172e-24	3.70216e-08	2.72948e-06	4.59512e-24	3.04834e-06	0.000266941
11378	233805	Dcun1d3	ILMN_2901402	GGCTCGGTTGGGGTAACGTGGTGACTGTTTAGGTTTACATGACCCTCTTC	7	119647450-119647499	1.28986e-13	1.16128e-09	1.39815e-05	3.16576e-13	1.40599e-07	0.0010767
11389	229871	Adh6b	ILMN_1213295	GGGAAAATGCATCCGTTGTGTCCTCTCTATGAGACCCTGATGGTGACCGG	3	138295164-138295172:138296061-138296091:138296092-138296101	7.09233e-25	1.51509e-16	1.07231e-16	2.69374e-24	7.14632e-14	3.46823e-13
11452	21807	Tsc22d1	ILMN_2723108	TCACTCGAGCCAGCACCACCGTTCTCACGCCCTGAGCTGCAGACAGCTAG	14	76904374-76904423	3.04146e-35	2.73479e-05	0.00957547	1.91784e-34	0.000985941	0.203658
11464	16909	Lmo2	ILMN_2767605	CTGTTTTTAGACACCTTCATTTTGAGGTGAGGCGCCCCACAGATTGTTTC	2	103821843-103821892	3.87355e-45	7.47496e-13	1.61645e-07	4.78577e-44	1.63969e-10	2.24522e-05
11504	227377	Farp2	ILMN_2745925	TCTCCAGATCAGCAAAAGCTGCTCTGGTTCCCATCGCACATGCCCATGTG	1	95518293-95518342	2.8157e-34	0.000435205	2.5131e-07	1.68092e-33	0.0107159	3.33712e-05
11531		Prkag3	ILMN_2468772	CTGCGGCCTATGGATTTAGATAGGGGCCTGAAATGCTTGGTTTCTGGACC			1.07022e-56	0.00327228	1.31739e-08	4.54176e-55	0.0554743	2.60492e-06
11547	16006	Igfbp1	ILMN_1230739	TCCAGGAACTAGTTTTTATACTCCACATACTGCTTGATACATGAAGCTGG	11	7102121-7102170	2.6482e-40	0.276921	2.13599e-06	2.27799e-39	0.748015	0.000214933
11565	69065	Chac1	ILMN_2617468	GGTCTGTTCCTGGAAAACACTACAGTCCTTGTCCATTCTCAGTTGACCCA	2	119179974-119180023	2.51375e-48	0.484603	6.25008e-11	4.04208e-47	0.870004	2.43974e-08
11583	108112	Eif4ebp3	ILMN_2895312	TACGCCACTACCCCGGGAGGCACCAGGATCATCTACGACAGAAAGTTCCT	18	36790258-36790276:36791256-36791286	4.96865e-49	3.18938e-08	1.08746e-12	8.57415e-48	2.70954e-06	8.20689e-10
11619	30937	Lmcd1	ILMN_2907540	TTCCTAGCTGCAACCAACTAAAGACACACTGGTATCCTGCCAGGGAGCCC	6	112280151-112280200	1.0513e-51	0.000281869	1.40426e-07	2.36248e-50	0.00735638	1.98708e-05
11654	70556	Slc25a33	ILMN_2761046	GGCAGCTGCTGCTGTTTCTAAGGGATGTGCCTCCTGCATCGCTTACCCAC	4	149123160-149123209	1.13795e-26	8.11815e-22	9.25942e-07	4.65849e-26	1.08463e-18	0.000101766
11702		A130038J17Rik	ILMN_2513781	GTGGACTGTTCTATATTTGCAGGAACTCTGGGCAAGGCTCGCTGTCTGTG			1.07304e-44	3.39135e-15	0.000919654	1.27595e-43	1.25872e-12	0.0345871
11768		Clec7a	ILMN_2663258	AGGCCTTTCCCGCAATCAGAGTGAAGGGCCATGGTTCTGGGAGGATGGAT			1.23679e-21	3.49286e-06	5.15938e-06	4.12091e-21	0.000162884	0.000464766
11808	16529	Kcnk5	ILMN_2982781	GCACACCAACCACGCTGTGTGCATGTGCCGATGGTGAAGGCAGATGTAAT	14	18930794-18930843	3.49701e-56	4.4344e-08	5.35549e-08	1.36272e-54	3.57285e-06	8.75459e-06
11816	18405	Orm1	ILMN_1226935	CCTTTGCCCACCTTATAGTGCTGAGGAAACATGGGGCCTTCATGCTTGCC	4	63007089-63007138	3.82346e-65	5.94395e-07	1.1347e-07	6.76289e-63	3.52288e-05	1.6628e-05
11941		Hmga2-ps1	ILMN_2521893	GCTGATCACTGCTGAGAGGAGAGGCACAACCAGGAACTTCTCAGGGCATT			5.93221e-36	7.0789e-07	1.5942e-06	3.88624e-35	4.09061e-05	0.00016481
11960	68910	Zfp467	ILMN_2429059	TTTATGGGGATCAGCCAGGTCAAGGGGAGATTGACTGAGCAAGAGACCTC			1.26361e-20	3.19648e-18	1.1301e-08	4.04107e-20	2.14572e-15	2.30138e-06
12065	17190	Mbd1	ILMN_2893081	GTGCTGAAGACCTGCTAGTTTCCTGGATTGTATTGCCAGTTTTGCCTGGG	18	74441969-74442018	2.31965e-20	8.65837e-12	0.000379745	7.33696e-20	1.6268e-09	0.0167758
12069	17190	Mbd1	ILMN_1224291	ACACATGAATTGCACTTAGTATCTGTCAGTGACTGGCCTTATTACTGCCC	18	74441796-74441845	7.64626e-07	2.46115e-07	0.0948976	1.4466e-06	1.60813e-05	0.799304
12142	11846	Arg1	ILMN_2952275	CTCAACGGGAGGGTAACCATAAGCCAGGGACTGACTACCTTAAACCACCT	10	24635421-24635470	4.88652e-67	0.000361914	2.75318e-13	1.23613e-64	0.0090741	2.83333e-10
12154	18408	Slc25a15	ILMN_3163476	TATACAGGGGAACTGGTGGCCTTATACACTAGCCTTATGCACCAGCCTCG	8	23488048-23488097	4.28917e-49	0.0108448	1.43717e-06	7.44415e-48	0.135916	0.000150293
12295	66968	Plin5	ILMN_3158565	TGGAGGAAGACCTGGTGCCCACATCATCTACCTGGGGGCTCAGAACTCCT	17	56251108-56251157	6.20547e-55	9.22042e-14	5.64795e-10	2.02734e-53	2.53036e-11	1.76376e-07
12457	75750	Slc10a6	ILMN_2636624	ATTATGTGTGTAATGCAAGCGGGCTAGCTCTTTCTCTTGAGAGGGACAGG	5	104035229-104035278	6.18856e-24	1.56752e-17	4.39152e-05	2.26535e-23	8.98465e-15	0.0028206
12469		Cpe	ILMN_1228232	ACAGCCTCCGCTCCTGGCTACCTGGCAATCACAAAGAAAGTGGCAGTTCC			3.54637e-60	0.000517312	9.07531e-05	2.59844e-58	0.0123351	0.00526171
12479		Syde2	ILMN_2766942	TTGAGGCGAAAGAAAGAGCGGCCGTGTGTGTTAAACCTGAGCGGTCCGGA			7.61826e-25	1.03177e-08	5.50357e-07	2.89034e-24	9.94034e-07	6.37359e-05
12661	100040353	LOC100040353	ILMN_2422014	TTGTCTGCGGGTCTTTTGGGAAGGTTTGATGGATCAGTTCTCATTGCGCG	3	21974617-21974666	1.91752e-34	1.95273e-06	1.33521e-07	1.15693e-33	9.72735e-05	1.89529e-05
12686		Fgl1	ILMN_1242370	ACTACCGTGGTTCCTACAGGGCAGAAACGGATAATGGTGTTGTGTGGTAC			6.70135e-69	0.0063097	8.1934e-06	2.70932e-66	0.0912518	0.000692174
12735	14027	Evpl	ILMN_2435835	GCGCAATCGTTTGTGGTGTTGGGCTCTGTCCCCAAATATGGGAAGTTCCG	11	116081917-116081966	1.61968e-39	0.000549714	2.50394e-08	1.32026e-38	0.0129509	4.46382e-06
13109	11847	Arg2	ILMN_2669164	ACTCTGGCACCTTTCACAACAGCATTACAGAGTTGCAAGGCATTCGAAGG	12	80257037-80257086	2.64232e-33	0.123929	1.53132e-07	1.49933e-32	0.55814	2.14674e-05
13144	241303	Fam78a	ILMN_2601453	CTGTGAACACGAACCCATGCGTGCACTTACCAGCAGGCGCGAGACTCTTG			1.68316e-51	0.0480817	2.77557e-08	3.72509e-50	0.34885	4.85253e-06
13353	108176	Npm3-ps1	ILMN_2965417	ACCTCTTCTGACCCACCTAACCCAGATTCAGTCCCCAGCACTGCAAAAAA	6	85026876-85026925	1.11701e-33	1.04039e-09	2.27933e-06	6.46793e-33	1.26981e-07	0.000227336
13492	16615	Klk1b16	ILMN_1259613	GTCACAGATGTCATGCTGTGTACAATAGAGATGGGTGAAGACAAAGGCCC	7	51396346-51396395	1.74443e-38	6.12882e-07	1.70321e-10	1.33158e-37	3.60883e-05	5.88726e-08
13504		Dock4	ILMN_1235799	GAGACAGCTTGGGTCTCATAGGAGAGCTTTGTCTTTGTGGAGTGTGAAAT			9.49451e-37	0.00489273	5.67532e-08	6.52186e-36	0.0752284	9.2109e-06
13649		6430548M08Rik	ILMN_2599214	ATGCAGGCCCATTAGCACACATTCAAACCTTCCGGGGCTGTGACCTTCAA			1.25259e-30	7.51044e-10	6.15737e-06	6.18118e-30	9.66641e-08	0.000540333
13650		6430548M08Rik	ILMN_1219474	TTAAGGCTGAGAAAGGTGTGAGGTCGAAGATCTCAGGCAGCGCTGTTTCC			2.31777e-55	7.76006e-12	1.81734e-09	7.98105e-54	1.4764e-09	4.86929e-07
13653		6620401C13Rik	ILMN_2548577	GCTTGGCACGGGCATGGAGGGGTTAAGTGGCCTTACGTAATGAGAGGACA			1.1648e-11	0.000159804	3.20344e-06	2.66166e-11	0.00452629	0.00030667
13769		Nnat	ILMN_1241164	AAATACCCGCTATATTCAGGCTCGATCCCAGGAGGGAGGCGGGGCACTTG			3.30825e-60	3.19159e-07	1.37892e-18	2.43975e-58	2.03834e-05	2.08129e-14
13794		Ctgf	ILMN_1238215	GGGAATTGTGACCTGAGTGACTCTCTGTCAGAACAAATGCTGTGCAGGTG			5.10828e-32	2.46745e-10	0.155597	2.71075e-31	3.50247e-08	0.979262
13827		Nrp	ILMN_1247094	CAGCCATGCTGAGGAGGAAGCAGATCAGGTCCTGGATTGGGATTTTGCTC			1.90401e-27	4.46587e-18	2.4166e-05	8.06129e-27	2.88884e-15	0.00170181
13849	74492	Kbtbd13	ILMN_1253136	TGGGCCGTCGATTGCTACCTCTTCCCTGATGTGTATCCCAAACTTGAAAT	9	65236574-65236623	3.79643e-59	9.7862e-10	7.38127e-09	2.35488e-57	1.21229e-07	1.59919e-06
13969		4632418H02Rik	ILMN_2628969	CCCAGCACCGTGGCCACTCCTTTACTCTCGAGGTTAAAGTTTTCCATTCT			2.56505e-22	8.72627e-09	0.0129421	8.77448e-22	8.49751e-07	0.252926
14005	75750	Slc10a6	ILMN_2822000	CATCTTCACACACCTGTGTTACCTACCTCATTCCTTAGAACAGTGGCTGC	5	103846300-103846349	3.56469e-31	3.12319e-24	1.59136e-06	1.80814e-30	8.31889e-21	0.00016481
14012		AI504432	ILMN_1226048	CTCAGCAAGAGTCTGTGATGTGTTCTGTCTTTCTCTGTGCAATGCAGTGT			5.50784e-54	5.51034e-06	6.94587e-07	1.59872e-52	0.000244142	7.82378e-05
14117	77717	6030408B16Rik	ILMN_3049778	GTTCTGAGTGTGTGGTCTGTTTCCAGCCCTTGACCCTTGGGATTCTTGGT	15	101124354-101124403	4.76201e-18	0.000149209	1.31491e-05	1.37756e-17	0.00427345	0.0010319
14118	77717	6030408B16Rik	ILMN_3125764	CGAGAACCTGGAACTGTTTCCCATCTGGAGAGTGTGTCAGCCATCCAGCA	15	101124251-101124300	6.44461e-36	4.47691e-10	2.43085e-16	4.21338e-35	6.0154e-08	6.87946e-13
14145	102595	Plekho2	ILMN_2749448	CCCTACAGCAACAAGGGTGCTGTACTTCTTCCAAGTCACCTGCTTCCAGG	9	65402390-65402439	8.95612e-50	5.68358e-20	0.0138082	1.66684e-48	5.04624e-17	0.263341
14234		Serpina1b	ILMN_1252899	GCAGCCACAGTCTTTGAAGCCGTTCCTATGTCTATGCCCCCTATCCTGCG			6.15846e-60	3.09607e-05	4.68338e-05	4.30342e-58	0.00109185	0.00298267
14267	12457	Ccrn4l	ILMN_1255422	GTGATGACGTTGGTAGACGTGTGAAGATTACTCCAATCACTTCTCCTGGG	3	51055149-51055198	8.04407e-26	2.33057e-07	1.47007e-08	3.18144e-25	1.52943e-05	2.83261e-06
14330	20672	Sox18	ILMN_2645321	CTTTCGCATATGTATGTTAGGGTATGCAACAGCCTTTAGAGCTGGTGGCC	2	181404794-181404843	7.43106e-37	3.70052e-19	0.000128724	5.13249e-36	2.79272e-16	0.00703003
14334		Ndrg1	ILMN_2646166	GGGTTTGTAGCATTGGCCTCTTAAGCAATGCCAGCCTAATGCCCATGCTC			2.50728e-43	5.25036e-10	0.0506227	2.70636e-42	6.97189e-08	0.57812
14435		9830132E05Rik	ILMN_2561677	ACCAGAGGTCCGTAGTATTCCAGTCCACCTGTGATCCTCCAGCCGTGACT			1.02554e-22	0.00276146	4.30101e-14	3.57238e-22	0.0488814	5.90164e-11
14619	76654	Upp2	ILMN_2458184	GGTCGCCTAGATGGGGCGTTATGCTCCTTTTCGAGAGAGAAAAAGCTAGA	2	58570574-58570623	7.14946e-68	8.43078e-10	1.91799e-12	2.32752e-65	1.06934e-07	1.37855e-09
14621	99571	Fgg	ILMN_2832105	CTCCATCGGAGAAGGACAGCAGCATCACATGGGGGGATCCAAACAGGCTG	3	82818184-82818229:82818757-82818760	1.536e-61	2.93609e-06	1.45056e-07	1.40509e-59	0.000139653	2.03984e-05
14720		Arg1	ILMN_2775157	TTCACCTGAGCTTTGATGTCGACGGGCTGGACCCAGCATTCACCCCGGCG			6.29894e-67	6.83833e-05	2.71898e-09	1.54174e-64	0.00214734	6.87812e-07
14884	235130	Adamts15	ILMN_3161887	AGCTCATCATGTTAGGGAGGAGGCTGGAAGGAGCCCAGCGTGGAAGTCGG	9	30706929-30706978	1.00778e-27	3.61069e-27	1.16319e-07	4.32215e-27	1.48633e-23	1.68276e-05
14936	50934	Slc7a8	ILMN_2598877	AGGGACCACCCGCTACCCCTCATTCCTCTCATTCCTTCAGCCTGTACCTG	14	55341287-55341336	1.91547e-42	5.35886e-14	5.36684e-06	1.93215e-41	1.55548e-11	0.00048122
15007		1500009L16Rik	ILMN_2463033	GAGCATCTCATCATATTAACTCTGCACTGTCTCTTAGGACGTAACTGAGG			1.09405e-32	7.49092e-09	0.00180021	6.01285e-32	7.3899e-07	0.0588982
15063	14825	Cxcl1	ILMN_2763245	CTGTTTCTCCTGGTCTCGTCTCGCTCGGGACAGAGACGTTCAAAGGACTG	5	91968231-91968280	2.6721e-11	0.0626689	4.06836e-05	6.02746e-11	0.403485	0.00263925
15119	104910	Slc25a47	ILMN_2681001	GTGCTGGCCACATGAAGATCCTGGAACCTGGGTCAGGGGTGGCTGTTAAT	12	110094955-110095004	6.16812e-66	2.1482e-09	1.19998e-07	1.2581e-63	2.43791e-07	1.72496e-05
15262	20393	Sgk1	ILMN_1213954	GGACCAATGCCCCAGTTGTCAGTCAAAGCCGTTGGTGTTTTCATTGTTTA	10	21719392-21719441	1.75718e-23	3.6941e-30	1.34861e-11	6.32136e-23	4.18182e-26	6.56629e-09
15421	11889	Asgr1	ILMN_2608703	TGTGCCCACTTCACGACGGATGGCCGCTGGAATGACGACGTCTGCAGGAG	11	69869929-69869940:69869916-69869953	4.75513e-72	2.86844e-05	2.56906e-11	4.58122e-69	0.00102192	1.17505e-08
15538		Nhsl2	ILMN_2476742	CTGGATTCCCGTTCCAGTAGCAGTAAGTAGGAGAGATCACAAACCCAGTC			7.71613e-37	7.40738e-13	7.56567e-09	5.32451e-36	1.63616e-10	1.62361e-06
15554	14605	Tsc22d3	ILMN_2701664	CTATAGCGGCGCGCCAGCAGCCACTCAAACCAGCCACAGCTCCCCGGCAA	X	137077513-137077562	8.24467e-12	1.76433e-17	0.228217	1.89343e-11	9.98634e-15	0.999997
15606	99929	Tiparp	ILMN_2589291	CCTCTTCTGCTTGGGAATGGAGGAAGTATATTACCTAGTTTTCAACTGTA			8.87629e-14	2.3183e-13	1.23317e-07	2.19082e-13	5.67432e-11	1.76149e-05
15626	12159	Bmp4	ILMN_1215252	GGCCTGTTGTGTCCCCACTGAACTGAGTGCCATTTCCATGTTGTACCTGG	14	47003601-47003650	2.50257e-36	3.94318e-07	0.000283869	1.67433e-35	2.43258e-05	0.0134737
15704		1700081H05Rik	ILMN_1220608	CTGCCTCGGTTTGTAACACCTCCCCGGATTCTCTGGAAAGTTCTGGCTTG			6.48389e-33	2.60265e-13	3.41377e-12	3.60463e-32	6.23549e-11	2.11752e-09
15866	16525	Kcnk1	ILMN_3009501	GGAAGGCATACCACCACTTCTACCCACTTCACAGGTCTGGAGGGCATACC	8	128554411-128554460	1.59878e-57	2.56085e-13	0.000333107	7.70975e-56	6.19894e-11	0.0152734
16018	20716	Serpina3n	ILMN_1246800	CCCCTGGCACTCCTACTTAGAACAAAGTAGCCTTTCTTTTAGTTCCCAGC	12	105652409-105652458	9.23887e-51	1.96611e-18	5.9184e-06	1.91113e-49	1.3489e-15	0.000524365
16025	18792	Plau	ILMN_2629582	CTCCAGACTGTGATGCGGGGCCATTTGGTCTTCCATGTGATGCTCCACGT	14	21662284-21662333	1.81743e-42	5.82932e-06	1.70911e-07	1.83654e-41	0.000257269	2.35946e-05
16171	13647	Egfbp2	ILMN_2791241	GTGTGCAGGAGAGATGGGTGGAGGCAAAGACACTTGTAGGGATGACTCCG	7	43884399-43884437:43884807-43884817	3.22447e-36	7.05862e-09	1.15867e-07	2.14464e-35	7.00924e-07	1.68276e-05
16391	57875	Angptl4	ILMN_2759365	CCAGAAAACATGGGCTCGAGGGGCACTGAATATCACTTCTCGCCTACCAG	17	33914308-33914357	3.4778e-52	1.42463e-13	0.000771757	8.14262e-51	3.67853e-11	0.0298683
16489	84112	Sucnr1	ILMN_1241789	CAGGACATGAGCTGCTGGATGCAGGTCTTCACTCAGCCAAAATGAGACAC	3	59890937-59890986	6.92634e-53	2.47818e-07	5.74778e-07	1.75409e-51	1.61459e-05	6.60571e-05
16492		A830037N18Rik	ILMN_1242926	CAGAGAGCCTACAACTCAGCGTCTTGAAGCCAGGTTTCCACCTGTATCCC			5.28813e-20	6.76643e-05	1.26296e-09	1.649e-19	0.00212919	3.50847e-07
16529	239743	Klhl6	ILMN_2619528	AATAAATCCAGGTCTTTCCACGCCAGTCAGTGTGTCTCCCACCATACTGC	16	19946689-19946738	4.00191e-43	0.493973	7.18992e-05	4.24878e-42	0.873976	0.00434668
16531	239743	Klhl6	ILMN_2840514	CAGGAAGCCAACCACAAATTCGGCTGGTGTCTCTGTCTGGCAAGTTTGCT	16	19946621-19946670	3.10592e-44	0.336465	8.60246e-06	3.55958e-43	0.792481	0.000713421
16810	108089	Rnf144a	ILMN_2678127	TGTATAAAACAAAAATGCATGTGTCGGTCATGCGCACGTGCACACGTAGA	12	26991967-26992016	5.21395e-31	8.10624e-10	1.25831e-05	2.62209e-30	1.03106e-07	0.000992637
16919		8430426J06Rik	ILMN_2551612	CATCTGAGTGCCCATCAGTCGCTGTAGACAAGCACAGCATGGTAAGGCCG			1.38801e-39	1.82045e-20	4.19271e-06	1.13592e-38	1.79199e-17	0.00038666
16925	14178	Fgf7	ILMN_2833706	GCTGCTGGGATGCTTTGTCAGATGATCAAGCCCCACACAAACTACAGACG	2	125915753-125915802	3.45751e-41	6.55838e-08	1.1571e-09	3.16922e-40	4.99949e-06	3.27467e-07
17133	20887	Sult1a1	ILMN_2745370	GAGTGGATATGGCTATACTGGGAACCAAGGCAAGCTGACACAGCCCATCA	7	133816608-133816657	5.62086e-32	2.57475e-11	0.000945377	2.97404e-31	4.36656e-09	0.0353198
17189		Pim3	ILMN_2717667	GCTGGGGAGGGGTTTAAATTATTGACCTTGTACAGTCTGCTTGCTGGCTC			7.46501e-35	1.14127e-07	7.1999e-07	4.61276e-34	8.18982e-06	8.03002e-05
17239	13085	Cyp2a12	ILMN_2645815	CACTGGGAAGCGATTCTGCTTGGGAGACAGCCTGGCTAAGATGGAGCTGT	7	27820467-27820471:27821484-27821528	2.10146e-68	5.56773e-05	1.12953e-07	7.86415e-66	0.00181376	1.6628e-05
17271	98999	Znfx1	ILMN_1219468	CAGCAGCACCTCCTGTGAGTCTTTATCCAGGCACCCTCCCTTGCAGCCTT	2	166861518-166861567	3.35703e-19	0.0579079	3.92881e-07	1.01604e-18	0.386402	4.83425e-05
17282	20295	Ccl17	ILMN_2717015	GGGCAAGCTCATCTGTGCAGACCCCAAAGACAAACATGTGAAGAAGGCCA	8	97335675-97335724	5.62107e-50	1.31947e-15	1.95887e-11	1.069e-48	5.33456e-13	9.43614e-09
17362	69068	1810011O10Rik	ILMN_1254307	GCCCAGTAAAACCCCACAGCATGGGCTATGTTTCTACAGGATTTGTACAC	8	25548341-25548390	1.73038e-38	6.1234e-12	0.0474065	1.32131e-37	1.19515e-09	0.557851
17409	666661	Gm8221	ILMN_1244198	GCTGAGGCTCACCAGGTCAACTGAGCTGTCAATCTTTCCATGGCTTTGTT			2.77784e-38	1.27942e-06	1.31213e-13	2.08769e-37	6.72863e-05	1.56354e-10
17488	16007	Cyr61	ILMN_2710253	ATTAAGGACTCCCTGGACGACCAGGATGACCTCCTCGGACTCGATGCCTC	3	145311567-145311616	1.14287e-22	9.94737e-10	9.84556e-12	3.97345e-22	1.22399e-07	5.00918e-09
17489	16007	Cyr61	ILMN_1235571	GCTCCATATTGGAGCATGTTTACGGATGACGTTCTGTTTTCTGTTTGTAA	3	145310324-145310373	3.85453e-17	7.02855e-08	3.92635e-11	1.07845e-16	5.30433e-06	1.63109e-08
17490	16007	Cyr61	ILMN_2794645	GAGACAAAATAAGATTAGTTGGGCCAAGTGAAAGCCCTGCTTGTCCTTTG	3	145310207-145310256	6.7261e-20	8.99187e-08	1.45722e-09	2.0905e-19	6.56711e-06	3.95115e-07
17527		Snta1	ILMN_1244949	GAAACTCCAACACCCTCTTTTGACCTCTTGGGGCACCAGGCACACAGTGG			6.62355e-27	4.53245e-09	2.60749e-05	2.73675e-26	4.69643e-07	0.00180259
17531	228608	Smox	ILMN_2597030	TTCCTTGAAGAACCACTAACTCGTGACTGCTGGTCCTCGTCCCTTGCCCC	2	131350640-131350689	1.00665e-49	3.64161e-05	0.0354328	1.86126e-48	0.00126067	0.473144
17533	228608	Smox	ILMN_1247267	TCCTTGAAGAACCACTAACTCGTGACTGCTGGTCCTCGTCCCTTGCCCCC	2	131350642-131350691	4.49192e-50	3.79764e-06	0.0213358	8.6259e-49	0.00017547	0.34635
17586	69784	1500009L16Rik	ILMN_1248734	GATATCTTCAAACAAATTCCGAAAGGTCATTCCTGCTGTGCAACCTCGCC	10	83224711-83224760	4.25299e-44	7.36213e-13	2.47617e-05	4.82535e-43	1.63414e-10	0.0017303
17626	634650	Gbp11	ILMN_2837493	CTCCAACCTTGACAGAATGTATCATCATGATTCATGGACCACAACAAACC	5	105752282-105752331	4.3102e-19	2.23888e-05	0.00467377	1.29845e-18	0.000824889	0.1229
17629	22041	Trf	ILMN_2485323	CTGGGGTAGACAGAACCGCTGGTTGGAACATCCCTATGGGCATGCTGTAC	9	103119717-103119766	3.9697e-52	0.03292	0.000104053	9.24174e-51	0.277382	0.00591169
17678	69906	Slc25a32	ILMN_1235842	GCATGGGGTTCACCTTGATACTTATGTCTGTATGGGAAGGCAAGCTATGG	15	38925851-38925900	1.77916e-34	3.9181e-16	9.37835e-13	1.07559e-33	1.70592e-13	7.4502e-10
17806	66724	Tab3	ILMN_2824022	GGGCACTGCCTGTGTTGCAGCACTACTGTATCTTTGTTGAGCGACCTAAC	X	82879302-82879351	9.28757e-31	0.257689	9.469e-09	4.61029e-30	0.734418	1.98503e-06
17868	56349	Net1	ILMN_2610771	CCTCAGAGGGAGCATGGAATTGTAATAGTGACACCTACGATCCGCATGGA	13	3882829-3882878	8.51898e-46	6.27812e-16	0.00492668	1.10783e-44	2.68188e-13	0.127769
17872	17245	Mdm1	ILMN_1227023	GATTTGCTGATACTCTTCCTGTTTCGAAAATTTTGGACCGTCAGCCCAGC	10	117601360-117601409	6.56042e-40	3.92671e-07	6.39655e-10	5.50217e-39	2.42903e-05	1.97035e-07
17873	17245	Mdm1	ILMN_2655659	AGAGAACTCGGTATCCAGCGGACGCACCATGATCTCACGACGCCAGCTGT	10	117596560-117596609	8.68364e-20	0.00688272	7.72675e-05	2.68692e-19	0.0971497	0.00459539
17876	17245	Mdm1	ILMN_2728300	GCCTTCTGTATACACAGGTGCAGTGTTAAGATGATTGGACTTTGAAAAGC	10	117605633-117605682	1.21719e-42	1.15758e-09	2.42229e-08	1.24752e-41	1.40599e-07	4.33532e-06
17877	17245	Mdm1	ILMN_2594863	GAAGTAGACATGGCGTCGGAAGACTCAGACCAGTCTGTAAAGAAGCCTGC	10	117589079-117589128	2.19055e-18	0.000766267	2.55333e-05	6.41385e-18	0.0171176	0.00177873
17880	17245	Mdm1	ILMN_2727628	CACAGGTGCAGTGTTAAGATGATTGGACTTTGAAAAGCTGGCTGTACATA	10	117605645-117605694	1.55961e-33	5.17878e-06	3.48236e-07	8.96656e-33	0.000231346	4.368e-05
17881	17245	Mdm1	ILMN_2659306	TCCATCTAAAGTGAAGCCACCAGGCCTCGAGCAGAGGAGGAGAGCGTCCT	10	117596735-117596784	5.18416e-29	1.24171e-05	1.93319e-10	2.36232e-28	0.000498458	6.58171e-08
17885	77629	4930544G21Rik	ILMN_2841307	GCCACAACCTCCTTACCCCATGGTAGAAATCTTTTTCAGACCTCAGTGGG	1	83252295-83252344	9.35513e-59	1.57756e-06	7.6254e-09	5.47299e-57	8.06247e-05	1.62871e-06
18036	18815	Plg	ILMN_2933463	CCAGGGCGACAGTGGAGGACCTCTGGTTTGCTTCGAGAAGGACAAGTACA	17	12611645-12611648:12611832-12611877	2.39168e-77	7.69993e-05	2.74595e-18	2.36124e-73	0.00239959	3.07347e-14
18055	12265	Ciita	ILMN_2678211	GAAAGGCAGATCTGTATCGCTCGCTGCCTTTGGTCTGTCTGGAAATGCCA	16	10527580-10527629	2.26713e-44	1.91127e-08	0.0175413	2.63158e-43	1.72056e-06	0.307031
18114	11639	Ak4	ILMN_1256564	CTGCACAATTCTTGCCAGAACAAATGCCATCAACTGCCTCAGGGCACTCC			5.55416e-57	1.73081e-05	1.00586e-07	2.47294e-55	0.00066026	1.50318e-05
18143	67888	Tmem100	ILMN_1224014	CGTTCCACCAAAAGCCTACATTGGCTTGGCATTCCCACGTACCTAAGAAG	11	89897445-89897494	3.22948e-48	2.296e-09	1.90979e-05	5.13282e-47	2.5862e-07	0.00139254
18314	50528	Tmprss2	ILMN_1223880	ATGGTTACCACTCCATGTAAAGAAAACTCCCTCATGCGTCCTCTGGGACC	16	97786471-97786520	2.12025e-62	7.19496e-14	3.91011e-13	2.19696e-60	2.03622e-11	3.7671e-10
18330	15512	Hspa2	ILMN_1223285	CCCTGATGCTCGCACACCTGACCTGTGGAAGCTTGGTTACACTAAGACAC	12	77507747-77507796	5.72349e-39	8.20762e-08	3.91237e-15	4.51744e-38	6.0628e-06	7.01444e-12
18532	225372	Apbb3	ILMN_1223271	GTTTGTTGTTTATATGGATGACTGAGAGGCCCTGCACTGTAACTTAGGCC	18	36830927-36830976	9.36136e-17	2.57371e-13	0.000101337	2.58124e-16	6.19894e-11	0.00577185
18719	77889	Lbh	ILMN_2816180	TTTCAGTGACATGCCTGTTGTGAGATGAACCTCCTGTGACTTCTGTCTGT	17	73291143-73291192	1.91142e-49	1.16992e-13	0.000514237	3.44139e-48	3.09796e-11	0.0215404
18734	14711	Gnmt	ILMN_2837816	CTGGCAGAGATGGCTCTCCTGGCTTCAGTAAGTTCCGGCTCTCTTACTAC	17	46862898-46862920:46863010-46863036	1.30471e-71	9.77492e-11	0.000691081	1.09405e-68	1.47049e-08	0.0275223
19082	12048	Bcl2l1	ILMN_2698430	TCCCCTGAAGGAGACTAGCTTGCCTTGGTTTTGATGTGTGTGGCCTCAGA	2	152607464-152607513	4.69703e-14	2.6832e-08	0.42502	1.17228e-13	2.3231e-06	0.999997
19395		Grasp	ILMN_2596396	GGCAGCCTGGACTGTTCCACCGTTTTCTGCATATGTTGCTTCTGAACCAC			3.74653e-32	2.05167e-13	0.000453528	2.00031e-31	5.10448e-11	0.0193756
19404	242864	Napepld	ILMN_2902492	CCACCGGGTACCGCTGCAGCCACTGTGTTACTGTAAGCCACACTGAAACT	5	21175120-21175169	2.56344e-49	1.10944e-06	7.77883e-05	4.55732e-48	5.94515e-05	0.00461038
19408	18979	Pon1	ILMN_2676379	GCCATACTGTAAGGTGCCTACCACAGTGATCTCTGCTAACTAATGAATGC	6	5118235-5118284	1.70168e-51	0.0626674	6.52518e-05	3.76422e-50	0.403485	0.00398741
19412		4930502E18Rik	ILMN_1222772	CCCATCCTCCCATGTTAGAATGCCAAAGCCATACACACAGGGTGGTTGTT			1.24248e-28	0.0170181	3.30626e-09	5.55058e-28	0.183911	8.09248e-07
19446	12269	C4bp	ILMN_2782794	GCCTGCGCTTACAGGCAACAAGACCATGCAGTATGTGCCAAATTCACACG	1	132532877-132532926	8.46986e-71	0.0521392	6.28203e-09	5.55832e-68	0.363665	1.41521e-06
19767	13143	Dapk2	ILMN_2977558	CTGTGTCTGCCAGCCTCTTGCCAGCCCACTGTGTTGTAGGTTTTTTCTCG	9	66119981-66120030	2.42514e-41	8.76225e-11	0.0110994	2.24934e-40	1.33142e-08	0.226597
19829		Fgfbp1	ILMN_2759371	GAGCTCCATTTGCACATTCTTCCTCAACATGTTACAGGCGACATCATGCT			8.16109e-43	0.0321119	3.84882e-11	8.47574e-42	0.273012	1.61369e-08
19873	66569	Gdpd1	ILMN_2683528	CGTCTTTTGCCTAAATTATGTCTCTGCTGTGGGGCCTGCCACGCACAGCT	11	86847447-86847496	7.56053e-42	2.82426e-11	1.15071e-05	7.28556e-41	4.7365e-09	0.000914128
19900		LOC332300	ILMN_2531139	AGGAGGTGTTTGGGAAGGATAATCCCTATGAGAAGCAATGCCGAGTAGGC			3.84966e-55	2.39342e-08	5.05233e-12	1.28363e-53	2.09221e-06	2.82438e-09
19925	74155	Errfi1	ILMN_2714031	GGCTGCTTCACTGCCCTGAGATTCAGTGAGACACGCAGTTTGTGTTCAGT	4	150242644-150242693	9.4632e-33	2.19269e-33	4.24946e-09	5.21484e-32	4.96436e-29	1.01809e-06
20015		Greb1	ILMN_2433318	GCACCGCGGGTGGTAGTAGTTCAAGGAGAAACCTGTCCAAGTTGATGCCA			2.18336e-51	1.22367e-08	0.00208273	4.78764e-50	1.16897e-06	0.0657199
20086	11555	Adrb2	ILMN_1241610	GGACTTGAAATATCCTGTGTCTTGGACCTTTCTGCTGTGACAATGGGCCC	18	62337701-62337750	7.27297e-39	3.85517e-11	0.000123039	5.69278e-38	6.25685e-09	0.00675091
20103	12608	Cebpb	ILMN_2756435	ACAGCGCACCGGGTTTCGGGACTTGATGCAATCCGGATCAAACGTGGCTG			1.23857e-34	7.16583e-10	0.00206234	7.55846e-34	9.29731e-08	0.065304
20335	71839	Osgin1	ILMN_2645780	CTGAGTGTCCAACTTGGAGGGCCCCAGGCCCAACTTTTCACCATCAGATC	8	121970082-121970131	2.40223e-48	5.26087e-08	7.63233e-07	3.86962e-47	4.11429e-06	8.49138e-05
20504	100047808	Fam89a	ILMN_2754940	AGTAGCACCTGCTGGAAGCTCTGACTGAAGGGTTCCGTGTGGAAAGCCTT			1.0561e-28	1.20682e-06	8.03825e-10	4.73292e-28	6.39883e-05	2.3946e-07
20536	21753	Tes	ILMN_1218592	GACACAAAGGCTATTTTCTTTGCCTGTGCACTCCCATCCTTGGGTGTTTT	6	17055679-17055728	5.28575e-45	1.42979e-13	1.13134e-10	6.45132e-44	3.67853e-11	4.13132e-08
20583	74030	Rin2	ILMN_2663196	GCCGACACTAAGGACATCCATTTATTTGGAGGCAGAAACCAAGTCATGTA	2	145712785-145712834	3.53122e-22	8.10499e-10	0.00860006	1.19989e-21	1.03106e-07	0.188599
20694	18626	Per1	ILMN_2813484	GGGCGGGTCTTCGGTTAAGGTTGCTGACAAGCTGCTGAAGTGGTCTGTCC	11	68925826-68925875	6.78241e-15	4.76316e-14	0.0120567	1.74805e-14	1.41895e-11	0.240501
20695	18626	Per1	ILMN_2813487	CAGAGTGGAAGTTCTCAGCCCCATTTGGAGGATTGTCCACGCCCGTCCCA	11	68925766-68925815	1.86414e-10	2.79809e-11	0.0288151	4.08134e-10	4.71005e-09	0.419004
20839	71724	Aox3	ILMN_2640097	AAATGCTGTAAGCCGTGGTCCATCCCAGTTGCCTAGTGCTTGGGGTTCCA	1	58257032-58257067:58257068-58257081	3.81255e-63	0.15846	2.95814e-05	4.57921e-61	0.615323	0.00202644
20911	18631	Pex11a	ILMN_2700265	CTCCTCACGGTAGTGTATCCTCAGCTGAAACTGAAGGCCCGCTAGGGTGT	7	86882222-86882227:86882228-86882271	1.01965e-43	9.48883e-17	3.15168e-11	1.1297e-42	4.62004e-14	1.36762e-08
20912	18631	Pex11a	ILMN_2960982	CCTCTCGGGACCCTCCTAAGTACAGCGTGGCTAATGAAGAGACTGAATGG	7	86882443-86882492	3.77896e-42	8.76499e-18	3.0635e-09	3.73044e-41	5.36334e-15	7.58024e-07
20969	654812	Angptl7	ILMN_2844820	GAACACCAGCCGGAGGTGAGCACAGACTCTGGGTGATCACAATACTGCCT	4	147339217-147339266	3.20307e-47	2.53371e-11	1.89917e-13	4.68621e-46	4.31758e-09	2.09748e-10
20970	654812	Angptl7	ILMN_2844819	TGTCAGAGTCCTGGGGGAGAGAGGAGCACTGGACAACATGCTGCGGGTCT	4	147339277-147339326	2.44413e-41	1.17926e-08	3.39377e-18	2.26649e-40	1.13132e-06	3.07347e-14
21264	140742	Sesn1	ILMN_2654074	CCCATGCCCTGCTGACCTCGGGACCCTGACTTTGAAGGTTATACAGCTCC	10	41627991-41628040	9.91104e-36	1.95676e-29	5.68697e-05	6.42034e-35	1.77208e-25	0.0035324
21265	140742	Sesn1	ILMN_3059476	GTCGAACGAGGCGTACGCAGCCTCGCTGGCTGTCTCCGAGCTGCTGAGCT	10	41607317-41607366	7.82772e-25	8.25998e-22	0.0121471	2.96832e-24	1.08463e-18	0.241689
21266	140742	Sesn1	ILMN_3136744	GGTTCCGGTGCCAACAATGTGGAAAATGTGGTTGCAGTCTGCTGCACAGG	10	41627921-41627970	9.13658e-36	1.65744e-30	9.9431e-06	5.92883e-35	2.50169e-26	0.000808319
21310	17842	Mup3	ILMN_1213817	CTTTGCCAACACATGGAAATTCTCCATTGATTTCTTTCCTGTCCTGTTCA	4	61744534-61744583	5.78002e-43	5.67886e-07	1.9213e-07	6.06125e-42	3.38348e-05	2.60596e-05
21562	640530	EG640530	ILMN_2449986	CCAACATGGTGATTGCTGATGTGAAGATGCTATCTGGTTTCATCCCATTG			1.08557e-72	1.3679e-08	3.51001e-13	1.29357e-69	1.2824e-06	3.45515e-10
21664		Plin5	ILMN_2607215	GGGCAAGCCCTAGCCCTACTTTCCATCCCCCAAAGACTCAGGAGCTGTGG			2.08508e-48	1.78739e-12	1.65857e-10	3.37556e-47	3.67885e-10	5.82185e-08
21940	28253	Slco1b2	ILMN_1255164	CTCTCCTGAAGTCTCTGCAATGGAGGGCTTCATGATGTGGCATATTTTGG	6	141634498-141634547	1.36246e-63	0.0525616	4.02764e-15	1.78305e-61	0.365516	7.01444e-12
22075	23959	Nt5e	ILMN_2813830	CAGCAGCTAGATGTCTGGACAGGGAACATGTTGGTTTCCTAGTGTTTACG	9	88169599-88169648	8.55657e-45	3.60416e-15	7.82147e-05	1.02609e-43	1.31613e-12	0.0046296
22144	84506	Hamp	ILMN_1236304	GCTGTAACAATTCCCAGTGTGGTATCTGTTGCAAAACATAGCCTAGAGCC	7	31727486-31727495:31727496-31727535	6.56988e-51	0.0041894	6.09412e-07	1.37791e-49	0.0671267	6.95083e-05
22196	64008	Aqp9	ILMN_1214634	CGGCGTTCCTCGATAACAGCAAGTTTCCCCAGGTGCTTTGCAAGACTAAC	9	70958594-70958643	9.23779e-63	0.260565	6.26896e-08	1.02273e-60	0.736863	1.00661e-05
22238	268515	Bahcc1	ILMN_1242613	AGGTCCCCCCATCCTTTTCCTTTCTTTCTGTGTGTACACGCAAATGGCGT	11	120153316-120153365	4.03341e-29	1.88337e-14	2.42121e-14	1.84668e-28	6.08203e-12	3.91553e-11
22686	244416	Ppp1r3b	ILMN_2639972	CGGGATCGTCCAGAGTCACTCAAAGACATTTCTCTTGCTGAGGTTCTGTG	8	36450756-36450805	1.31842e-51	0.0223027	3.82521e-06	2.93941e-50	0.219637	0.000357871
22733	56349	Net1	ILMN_3151722	CCCCCTTTGTCTCAACTGGAATGAACAAACACCCGTGGCAGTCTCACTGC	13	3882701-3882750	6.91027e-46	1.23865e-18	0.00736064	9.04869e-45	8.90278e-16	0.169842
22811		1200012P04Rik	ILMN_1245384	TCACAGACTGTCAGGAAGCACACGTGCAGGCCTCTTCATCTGGGAACCAG			2.49332e-41	2.75121e-15	3.06818e-13	2.31115e-40	1.05574e-12	3.08734e-10
22846		Dusp4	ILMN_2450767	GAGCATTGTGAGTGAGCTCAATATAGTGTCTGGGTGTTGATGTTATTTCC			9.20718e-31	6.06969e-05	8.47487e-07	4.57138e-30	0.00194785	9.38266e-05
22857		Hif3a	ILMN_2649671	CCCACAAATGTCTCCAAAACCACCATAAAGACCTCTCCTTGTTAGGCACC			4.5975e-21	5.53701e-24	0.00898409	1.49812e-20	1.3929e-20	0.194552
22880	16362	Irf1	ILMN_2599782	AAGGTTGGCTCCCTTAGCCTCAGAGGGAATCTGCCTCACTACCTGCTCCA	11	53590460-53590509	6.72457e-34	3.25547e-18	0.0237252	3.93863e-33	2.14572e-15	0.371158
22883	16362	Irf1	ILMN_2649067	CTAAGCACGGCTGGGACATCAACAAGGATGCCTGTCTGTTCCGGAGCTGG	11	53586376-53586425	1.07977e-27	1.46149e-10	0.00545002	4.62243e-27	2.14862e-08	0.137753
22884	16362	Irf1	ILMN_2834777	CCACCTAACTGCTAAATGGTGTTTGGTCATGTGGTGGACCTGTGTAAATA	11	53590737-53590786	9.24769e-39	7.44036e-22	0.00886054	7.19245e-38	1.08463e-18	0.192535
22979	226105	Cyp2c70	ILMN_1245514	CCTGTCCTATGTACCTGCATCTGGTAGTCCTTTATGAATGGCAGGGATGC	19	40227953-40228002	7.32231e-69	1.35678e-08	1.87303e-12	2.88314e-66	1.27461e-06	1.36795e-09
22997	218544	Sgtb	ILMN_2847248	AATGGCGGTGAGTCCCAGCACGTGGGAGGTAAGGGTCAGGACCAGGAATT	13	104931245-104931294	1.46303e-47	1.34081e-07	9.46477e-10	2.1958e-46	9.44221e-06	2.74408e-07
23094	17873	Gadd45b	ILMN_2900653	AGGAGGGCACCTCAGGCAAGAGGAGACTGAGACTTTAGAGCCAAGGCCTG	10	80389633-80389682	3.11189e-38	6.67024e-08	7.56055e-17	2.33139e-37	5.05921e-06	2.85291e-13
23110		Mthfd2	ILMN_2769136	AAGAACTGTCAGCAGCTGCCTGCACGTCTTTCACGTACCCCGTTGGCTTT			7.62498e-39	5.06085e-17	7.81296e-06	5.96213e-38	2.6041e-14	0.000662507
23128		Mela	ILMN_1251419	TATTGCTGCCCAGCTCTATAAAAAGGGTAAGAACCCCACACTCGGCGCGC			8.05396e-17	4.40163e-07	0.00134532	2.2278e-16	2.68612e-05	0.0463958
23129		Mela	ILMN_1255287	GCCTCATTTAAACTAACCAATCAGCTCGCTTCTCGCTTCTGTACCCGCGC			2.03517e-23	1.27202e-08	0.00382714	7.29879e-23	1.20499e-06	0.105863
23152	433470	AA467197	ILMN_3160750	CGGAAAAGAAACCCAGAGCCTTGGGAAATGGTGGATCCTACTCAACCCCA	2	122464959-122465008	3.17255e-40	6.47391e-12	2.03325e-05	2.71511e-39	1.25114e-09	0.00146604
23253	15458	Hpx	ILMN_2830333	CCCCATGAGAAAGTTGATGGGGCCCTGTGTTTGGACAAGTCTCTTGGCCC	7	112740340-112740389	1.54695e-65	1.05134e-05	3.51875e-09	2.94317e-63	0.000432388	8.56626e-07
23254	15458	Hpx	ILMN_2744565	CACTGGCCTCAGGGTCCTTCAACAGTAGATGCTGCCTTTTCCTGGGATGA	7	112740858-112740907	1.3763e-60	1.4186e-07	7.07664e-11	1.0708e-58	9.89182e-06	2.71557e-08
23305	56642	Ankrd2	ILMN_2806065	GTGGCCGTGAGACACCTCAGCCTATACCAGCCCAGTAAATACCTACCCGG	19	42119460-42119497:42119498-42119509	3.51241e-57	1.00267e-06	5.4082e-05	1.61467e-55	5.48994e-05	0.00338712
23309	545288	Cyp2c67	ILMN_3074610	CAAGCTGAAACCTCTGGTTGATCCAAAGGACATCGACATGACCCCCAAAC	19	39683625-39683674	3.86416e-62	0.0161536	4.65293e-09	3.86254e-60	0.178012	1.09734e-06
23391	77037	Mrap	ILMN_1234241	CCAACCCGGGCAGCTACGTCTTTTTTAGGGCCGTTTACAATGGCCTTGAA			2.65809e-69	1.38658e-11	6.07119e-06	1.1463e-66	2.48165e-09	0.000535886
23417	17844	Mup5	ILMN_3158509	GAGGAAAACTTCCAGCTGATGGAGCTCTTTGGTCGAGAACCAGATTTGAG	4	61495621-61495670	3.52223e-53	0.00793705	5.45469e-07	9.24046e-52	0.108122	6.33318e-05
23431	632684	Larp4	ILMN_1248468	AAATGAAATAGTGCTTCTGGCTGTGCGGGCATAAATCTCCAACCCTGGCC			4.16856e-15	3.55014e-08	0.0109518	1.08319e-14	2.96594e-06	0.224394
23742	17286	Meox2	ILMN_2709087	ATTAGGATCATAGGCAAATCAGTTACCTTGCAGAACGAGTCTTGTGCGGC			8.28348e-41	3.32907e-05	5.43869e-05	7.38791e-40	0.00116494	0.00339682
23752	14071	F9	ILMN_2660793	CTGCTGACTCTGCTAACGTTCCACTACTTGTTGCCTCTTTTGTCTTGCAA	X	57283857-57283906	1.45583e-68	0.0402849	2.70345e-09	5.58656e-66	0.312796	6.87725e-07
23781	17748	Mt1	ILMN_2596522	ACAGTTCCACCCTGTTTACTAAACCCCCGTTTTCTACCGAGTACGTGAAT	8	96704156-96704205	4.94329e-21	3.32098e-17	0.000115561	1.60826e-20	1.76914e-14	0.00644422
23788	235320	Zbtb16	ILMN_1229216	CCTGAGAACACACAACGGTGCCTCGCCATACCAGTGTACCATCTGCACGG	9	48465359-48465408	1.40079e-20	8.43128e-17	1.32054e-06	4.47156e-20	4.19535e-14	0.000139708
23977	20491	Sla	ILMN_3118707	TGTCACACAAGGTCAGTAACTTCTGCTATGAGGCCATGATCTCTGGCTCC	15	66612588-66612637	7.47861e-44	3.07221e-09	0.0302575	8.35321e-43	3.31221e-07	0.43176
24084	18769	Pkig	ILMN_1253384	GAGGCTGTTGTAGACCTTCAGAGGTGATCAGAGAGAGAGGATTACACTAG	2	163484902-163484951	1.39222e-21	3.46e-07	0.000154639	4.63094e-21	2.18511e-05	0.00816107
24177	60599	Trp53inp1	ILMN_2506012	AAACCGTGATTTGTGAGGTTAGAAGTGTGTATTTGGGGGCCTCAGGTGTG	4	11083606-11083655	1.00387e-25	2.49974e-23	0.0165984	3.95786e-25	5.39399e-20	0.296262
24178	60599	Trp53inp1	ILMN_2971479	GATTACTGTACACCAATCTATGCATAAATGGCAGCTTGTTTTCTTGAGCC	4	11101240-11101289	4.67482e-07	3.8093e-07	0.538669	8.93959e-07	2.3661e-05	0.999997
24233	15901	Id1	ILMN_2672190	GACTCTTGGCGGATCGGTCCAGTGGGTAGAGGGTTTGATCAACAGAGCCT	2	152562859-152562908	9.53783e-39	0.593057	7.08883e-09	7.41174e-38	0.911872	1.55067e-06
24261	68774	Ms4a6d	ILMN_2602352	CACAACTAGACACAACCCAAGATGCTTATCATTTCTTTAGCCCTGAGCCA	19	11664515-11664564	1.66797e-30	2.8024e-13	0.0725285	8.17927e-30	6.67872e-11	0.703097
24262	68774	Ms4a6d	ILMN_1241695	CTGGCTGGGTTCAGTAGCACGCTCTTGATTTGGCGTCAGTCAAAACACAG	19	11661384-11661433	1.54978e-33	7.09634e-20	0.0952917	8.91116e-33	5.95054e-17	0.801729
24343	17133	Maff	ILMN_1256996	CCACTGGTAGAGAGAGGCAAACACTACAGTCCTGATGCAGGAGAATGGGG	15	79189026-79189075	3.74166e-18	3.06445e-17	5.09646e-06	1.08627e-17	1.65445e-14	0.000460624
24538	233079	Ffar2	ILMN_2756046	CCACTGTTATGCCGGGATCTGGGTCACATGCTTATCCTCTGTGTCACCAG	7	31603486-31603535	9.19356e-56	9.83467e-10	2.22133e-05	3.34104e-54	1.21342e-07	0.00157624
24543	17750	Mt2	ILMN_1219154	GAAGGGGGGCGGAGGGGTCCCCACATCTGTGTAAATAGACCATGTAGAAG	8	96697326-96697327:96697328-96697375	6.22296e-30	9.28488e-18	8.37714e-08	2.97207e-29	5.60571e-15	1.27719e-05
24564	20971	Sdc4	ILMN_2728729	GAAGTCATTCCTCGGTTGCACTAGCCACACAAAATGCTCAGTCACCATCC	2	164250123-164250172	2.47615e-29	5.52511e-06	0.0139558	1.1468e-28	0.000244558	0.265391
24567	15112	Hao1	ILMN_2875475	GTGGCACTCATTGCATTTGACAGGGATGTGTCTAGTCCAGTTGGGACCAC	2	134189024-134189073	3.04186e-67	0.212483	1.78365e-08	8.15021e-65	0.688025	3.32368e-06
24676	15496	Hsd3b5	ILMN_1234449	CTGGCCCAGTCACACACCATCAGTCCTAAGCACTTGCCCAGTAATGCACA	3	98422743-98422792	1.04859e-73	0.00291718	8.9515e-14	1.75856e-70	0.0509027	1.09549e-10
24812	11425	Apoc4	ILMN_3009225	TGTGTCCCAGACTGCTCTGCAAAGACCGGACTCAGGGTTAAAGTGCCACG	7	20263486-20263495:20263496-20263535	2.3174e-61	5.32134e-08	6.78355e-10	2.0535e-59	4.1536e-06	2.07545e-07
24929	56338	Txnip	ILMN_3112873	GGGCACAGAAGCCCCCAGACCCCATTTCCTGTCCAGTGTTGGGAGAAAGT	3	96364250-96364282:96364148-96364164	7.08318e-40	2.9826e-09	0.00188809	5.93182e-39	3.23099e-07	0.0611112
24990		3110023G01Rik	ILMN_1258768	CCAGCGTGACTGGGATGGAAGGGAGGAAGTTATCCTTGAGAGCTGGACTC			1.84136e-45	5.32947e-08	4.75936e-16	2.33032e-44	4.1536e-06	1.13426e-12
25002		2010016I18Rik	ILMN_2520264	GAGCAGCCAGGTAGATCAGCTCAGCTGTTTCCTCAATCCGGACCTTGAGT			2.06055e-32	0.000154964	0.0917972	1.11647e-31	0.00441872	0.790391
25028	75219	Dusp18	ILMN_1247614	GGTAGGCAGGAGAGGATGAAGCTAACTGCTGTTCTAGACTAATGTCATCC	11	3798963-3799012	1.81932e-13	0.000215725	0.0103692	4.43908e-13	0.00586329	0.215974
25113	26939	Polr3e	ILMN_2660781	CGTCGGAACTTGATCCAGTCTCGGCTGACTCAAGAATGTGGAGAAGAGCT	7	128088129-128088178	7.08184e-45	0.000179519	1.80382e-08	8.549e-44	0.00501159	3.3475e-06
25187	104174	Gldc	ILMN_2873750	GTGCCTGATCTGTCACAGCATAAGTGTCCTCCTTTCACTGTGCGGACTTT	19	30172985-30173034	9.13379e-62	1.87216e-07	2.02385e-08	8.65245e-60	1.26527e-05	3.72528e-06
25245	20211	Saa4	ILMN_1247506	CGAGAAGGCACGGATGAAGACGGAGATTCTAGTCATACGGGAGCAACTGC	7	53983598-53983647	1.60506e-73	1.91735e-07	3.04999e-12	2.50616e-70	1.29388e-05	2.00154e-09
25288	16622	Klk1b5	ILMN_1255129	ATATACGAACCCGCAGATGATCTCCAGTGTGTGAACTTCAAGCTCCTGCC	7	51475263-51475266:51475361-51475406	1.02366e-24	0.000337129	0.00697412	3.86367e-24	0.00857614	0.163968
25404		Rgs2	ILMN_2480115	CCTAGACCACATCTCGTTTTAGATGTTGTCACAGCAATGGGTTCTGTAAT			3.90953e-39	7.67191e-14	1.25314e-11	3.12328e-38	2.14439e-11	6.23554e-09
25405		Rgs2	ILMN_2666622	GGAACAAGCACAAGTACAGGAGGGACAACCTGGCTCATTTCTGTATCACC			5.97901e-47	3.26872e-13	2.03299e-13	8.54864e-46	7.5903e-11	2.19181e-10
25466	245297	EG245297	ILMN_3155626	TGCAGGCCATCTACAAGATGGTGTCCTCCATGATGAAGATGCCTGAGGAC	12	18070533-18070582	9.33815e-30	1.21264e-08	3.80611e-05	4.41333e-29	1.16088e-06	0.00250501
25519	17356	Mllt4	ILMN_2493464	GCCGTCCCTGGACAGTGAGGTCAGATGTGAATACATATTGTAAGAGCACG			4.37077e-42	1.75892e-09	6.03786e-08	4.29498e-41	2.0422e-07	9.72956e-06
25622	11699	Ambp	ILMN_2904137	GAACTAATACGCAGTTGAAGGTGCCAGTCTGCAAGCCAGAGGGTAGCCAC	4	62629702-62629735:62629736-62629751	3.09541e-61	5.97371e-08	8.31168e-11	2.68739e-59	4.57691e-06	3.1627e-08
25852	230099	Car9	ILMN_2874084	CCCAGCCTCTTGAATGCTGGGATTACAGGAATGCACCATCATGCTTGGTC	4	43534737-43534786	1.13673e-36	0.00350535	3.29752e-12	7.76473e-36	0.0585273	2.07382e-09
25909		Ms4a8a	ILMN_2531881	GCACAGGGTGCAGTCAATCTCTCGGGGAGTAAGTTTTCTACAGCAAAGAG			9.15314e-33	1.4574e-05	0.00103531	5.04643e-32	0.000570377	0.0378367
26232	70807	Arrdc2	ILMN_2613191	CCAGCTTCCTGCAAGACTGGGGCCTGTGCACCATGATGGATCGGCCAGAG	8	73360757-73360806	3.38282e-06	7.56321e-11	0.000152436	6.19875e-06	1.16884e-08	0.00808248
26233	70807	Arrdc2	ILMN_2693835	CAGGATACAGACAAGTACATCGCAAGGAGAACAGGCAACTGGGGCAGCTG	8	73359168-73359217	4.13086e-20	1.44399e-16	4.03273e-06	1.29303e-19	6.88265e-14	0.000375733
26373	14245	Lpin1	ILMN_3111744	GTTCTCTCGTGACCTTTGGAGGCCATGGTAACCCTTCTGCCACCACGGTG	12	16543564-16543613	9.58437e-33	1.00234e-10	0.0592325	5.28032e-32	1.50288e-08	0.630288
26378	22329	Vcam1	ILMN_2778655	CCGTCGCGAGGTTGTTTAGAGTAGCAGCACTCCATATGCAGGTCAGAACG	3	115813464-115813513	2.81829e-44	1.97191e-06	0.00229717	3.24061e-43	9.8121e-05	0.0710991
26498	13884	Ces1c	ILMN_2704749	TTGGAGGGAACCCGGATTCCGTGACCATCTTTGGAGAGTCATCAGGGGGT	8	96012241-96012290	3.48767e-62	0.00181335	2.01861e-08	3.52512e-60	0.0347291	3.72528e-06
26499	13884	Ces1c	ILMN_2980371	GGTTGAGGGTGATCATGGCGATGAAATCTTCTTTGTATTCGGGGCTCCAC	8	95993250-95993299	2.30179e-68	8.05135e-05	3.3488e-14	8.47378e-66	0.00249708	5.05457e-11
26555	70274	Ly6g6e	ILMN_2991389	CCCGAGGGTCTCAAGAACAGAGGGCTACCTTGGGGAACCATAAAGAGTGT	17	35215301-35215350	1.57034e-20	5.97252e-08	1.35248e-08	5.00116e-20	4.57691e-06	2.65115e-06
26666	23796	Aplnr	ILMN_2748850	TCTCAGGCCAGAAACTTTCACACAGCTACTTTCTCCGCCAGGCCATTCTC	2	84979858-84979907	1.72932e-26	5.45185e-21	7.55421e-08	7.01779e-26	6.08339e-18	1.17128e-05
26667	239122	Setdb2	ILMN_3042783	CTGCCGCCCCAGAAGATAAGAATGGATTTAAACCAGCTCAAGAACACGTG	14	60030952-60031001	4.6438e-19	5.00295e-13	1.17085e-07	1.39718e-18	1.13838e-10	1.68845e-05
26668	239122	Setdb2	ILMN_1228453	GCAAGGACAGAACTAACGTGGGATTATGGTTATGAAGCTGGGGCCACGCC	14	60021193-60021242	7.0868e-29	1.6593e-27	1.23176e-08	3.20449e-28	7.51348e-24	2.44629e-06
26932	17768	Mthfd2	ILMN_2878548	GGAAGAGAAAGCAGCACAGGGTTTCAACGGCACTCCCTTACTCTCTCGGG	6	83256216-83256265	1.00336e-24	3.37293e-14	7.00581e-06	3.78924e-24	1.04609e-11	0.000605401
27002	20317	Serpinf1	ILMN_2639239	CCAGGAAGGCGGCCGGTAGCTTCAGTGTAGCCTCTGCAATAAAAGAGCTT	11	75223538-75223587	3.46167e-60	0.199676	2.15369e-05	2.54178e-58	0.674088	0.00153577
27027	208618	Etl4	ILMN_1259022	CCACAGGGTTTCAGCTCTGAGGGCATTCTAAGCAACGTGTAATCACATCC	2	20730903-20730952	8.16544e-40	8.67138e-07	6.45244e-06	6.80043e-39	4.85891e-05	0.000562131
27091	76905	Lrg1	ILMN_2652500	CCCCCAGGCCACCTTGTGTTTATCTGGCTTTGACACGTCTGTTTCAGGGG	17	56259141-56259190	2.96553e-47	2.91917e-09	4.10095e-05	4.34993e-46	3.17649e-07	0.00265658
27102		9530053J19Rik	ILMN_1255621	GGCTTCCAACGGTGGAGTCTGTTAGAGTCCAGAAATTTTGATTGAGGCTG			5.3145e-22	1.4908e-09	1.73595e-06	1.79265e-21	1.76254e-07	0.000177841
27122	269529	Fbxo10	ILMN_2529395	CTGGCCCTTCCCATGTGTAGCACTGTTCACTGCACTTGTTTGGTGGCCCC	4	45047236-45047285	6.45721e-55	0.0212749	2.71486e-07	2.10503e-53	0.213083	3.58402e-05
27197	74253	Klrg2	ILMN_2631171	GGGAACAAACCTGCGGCGGACATTTCAGACTCAACCCAGAGCATTCCTAT	6	38577273-38577322	2.80566e-21	6.41284e-20	3.89637e-14	9.22206e-21	5.47886e-17	5.69134e-11
27367	14605	Tsc22d3	ILMN_3150811	TGATCCCTTTGGGGTGTGGAAAATGTACCCAGGAAGCTTGTGTAAGGAGG	X	137074194-137074243	4.38828e-11	8.12927e-22	0.000536797	9.81699e-11	1.08463e-18	0.0222793
27383	56338	Txnip	ILMN_1213609	GCTGCTTTCACTGTGGCCTCAGCCCTGGCTCGGAAGCTCACTAAGCCTTA	3	96364169-96364218	6.47538e-42	1.62517e-07	0.00316057	6.27593e-41	1.11838e-05	0.0912132
27465	13909	Ces3b	ILMN_2917053	CCTAGACCTTACTGACTGGGCCAACCCAAGAATAGTGGCACCCAAGCAGG	8	107617185-107617234	4.22703e-75	0.001834	1.442e-17	1.19627e-71	0.0350549	7.41781e-14
27467	13909	Ces3b	ILMN_1254721	CATTCCTACCTTGAACTTCTCAAAATACCTTCGAGATGCTGGGTGCCCTG	8	107615535-107615558:107616505-107616530	6.73314e-64	0.00446951	6.45132e-09	9.35225e-62	0.0704924	1.43527e-06
27576	11818	Apoh	ILMN_1243128	CAGAACTGACACCGTGCTGAAGTCGTTTCCAGAATCAAAATTGAATGTCG	11	108275590-108275609:108275610-108275639	3.46344e-60	0.000151651	2.79533e-06	2.54178e-58	0.00433516	0.000271621
27662	14281	Fos	ILMN_2750515	GTCCTTCAGCGTCAATGTTCATTGTCATGTTACTGATCATGCATTGTCGA	12	86817951-86818000	6.60329e-23	0.00292606	3.42572e-08	2.3175e-22	0.0509988	5.83158e-06
27697	54150	Rdh7	ILMN_1226515	CTGGAGCTCTGTAAAGCCTGCCCAAGCCCTGTGAATCTGCACGTGTGTGC			1.04448e-77	1.9391e-05	1.00067e-12	1.5765e-73	0.000729274	7.67988e-10
27794	353156	Egfl7	ILMN_1215919	CCAGCAGCTGGACCGAATTGATTCACTGAGTGAGCAGGTGTCCTTCTTGG	2	26447732-26447781	2.55319e-41	9.34177e-15	2.47503e-06	2.36471e-40	3.15675e-12	0.000244658
27828	211577	Mrgprf	ILMN_2760254	CTTCCAGGCCACTGTAGTCCACTGCTAAGTCCTCAATCTCCTGTACCCAT	7	152495266-152495315	4.95082e-22	1.02778e-09	6.29713e-10	1.67148e-21	1.2578e-07	1.95302e-07
27875	11717	Ampd3	ILMN_2448651	CTGTCCTGTGACTGTCATCCTTCCAGTTGTTGTGTAGCGTATGGAACCAT	7	117955663-117955712	1.22595e-39	9.7845e-20	3.22124e-07	1.00638e-38	8.05549e-17	4.10877e-05
28027	69008	Cab39l	ILMN_1217943	GGGTTTGAATTGGCTCTTTGCCAGCATCCTTTTATCCTAGCTGTGTACTT	14	60167478-60167527	4.93297e-33	4.86958e-15	8.52754e-08	2.76004e-32	1.75e-12	1.29576e-05
28070		Slc27a5	ILMN_1228815	AAGTCACGGCTGGTGCGTGAGGGTTTTGATGTGGGGATCATTGCTGACCC			1.10187e-73	1.76264e-05	1.53614e-14	1.78192e-70	0.000670705	2.57622e-11
28112	12522	Cd83	ILMN_2865016	TGGTCTTCTGTGTGAACTCCTCCTGAGAAACGTGGAGACTGGCTCAGCGC	13	43898178-43898227	1.35586e-53	1.29904e-18	0.000337543	3.74129e-52	9.1909e-16	0.0154036
28132	58801	Pmaip1	ILMN_2670625	GAGAGGCAAGAAACTTGAGTAGACATTCCCAAAAGGCAGGTGGCCAGCAG	18	66624035-66624084	6.55229e-29	2.30841e-06	5.20319e-11	2.96902e-28	0.000113493	2.085e-08
28133	20715	Serpina3g	ILMN_2725927	CTCAATGTCTCTTGTTGACCAACTACGTAGGACTGGTGGACACCTCTGCA	12	105480110-105480144	2.91499e-40	0.0065076	1.52922e-05	2.50083e-39	0.0934506	0.00115794
28212	72750	Fam117b	ILMN_3084791	CCTTAATGCTGGTGTGGGGGGTGTCAAACTGGACCAATGGAAATGCTGGA	1	59929510-59929559	1.50564e-12	3.54828e-23	0.00261161	3.54755e-12	7.30318e-20	0.0781086
28433	100047902	LOC100047902	ILMN_1232230	GCTCACCGAGCAGAGACAGGACCAAAGGAAGACTCCAAAGTTCACCAGCC			2.81662e-33	8.77862e-05	3.27007e-08	1.59504e-32	0.00269678	5.58763e-06
28482	16617	Klk1b24	ILMN_1256024	ACGGTATCACATCATGGGGTCCTGTCCCATGTGGTAAACCCAATGCGCCG	7	51447661-51447710	2.11239e-23	6.78095e-10	4.15782e-07	7.57214e-23	8.87423e-08	5.04746e-05
28483	16617	Klk1b24	ILMN_2622463	AGTGTGTGTTCATCAAGCTCCTGCCCAATGAGAACTGTACCAAACCCTAC	7	51447135-51447184	3.68575e-32	3.1092e-06	0.000120879	1.96879e-31	0.000147268	0.00668318
28607	17532	Mras	ILMN_2451441	CCCTTTGCGTGACAGTATTAGCAGGTGGCAGTTGTCGTGTGAGGAGCGAG			4.97231e-41	6.37395e-07	0.000136015	4.50843e-40	3.73375e-05	0.0073495
28623	243270	Gpr81	ILMN_2699134	AGGTTGTCCCTGTGGCTTCCTTTGCCAGAGGTGTTGAAGCCTAGGTGCGA	5	124327207-124327256	1.86618e-47	2.17427e-11	9.25319e-07	2.76876e-46	3.75776e-09	0.000101766
28703	54325	Elovl1	ILMN_2723491	TGCCTTAAACTTGGGAGAGGAACACTCAGGGCTGGCCGGCACGCACCCGG	4	118104988-118105037	1.03573e-29	0.00483571	3.52877e-05	4.88224e-29	0.0745141	0.00235326
28911	620807	Mup6	ILMN_2953807	AATGAATGGGGAAACCTTCCAGCTGATGTCGCTCTATGGCCGAGAACCAG	4	60018417-60018454:60018794-60018805	4.57435e-41	0.000441836	0.000123	4.15592e-40	0.0108497	0.00675091
28941	12575	Cdkn1a	ILMN_2846776	TGGCAACCCCCTGCATTGTGGGTCTAGGGTGGGTCCTTGGTGGTGAGACA	17	28827907-28827956	3.60334e-14	8.38369e-22	0.0628301	9.031e-14	1.08463e-18	0.651032
28942	12575	Cdkn1a	ILMN_2846775	CTTGGGGGCTAAGGGAGCTCACAGGACACTGAGCAATGGCTGATCCTTTC	17	28828090-28828139	4.68444e-19	9.63215e-28	0.00258699	1.40922e-18	4.84615e-24	0.0775257
29041	20776	Tmie	ILMN_1218037	TTCTATGGCCAGGACTCTCTGATGATGGCAGCAGTCAGCCATCTGCCTGC	9	110768594-110768643	1.40958e-36	0.00250107	1.1231e-06	9.5765e-36	0.0448696	0.000121663
29295	13636	Efna1	ILMN_1244460	GTCTGTGGAGTTTAGCTTAACGGGCAGGGCCCACATGTACAGTGTCTGTA	3	89075748-89075797	1.81661e-37	3.91217e-19	4.93022e-06	1.29724e-36	2.90405e-16	0.000449186
29388	93842	Igsf9	ILMN_2804166	CTACCTCTCTGTGTCTCGGTGGCCTGGTGGTAGGCTTGAGTGAGCTTGGT	1	174428753-174428802	9.95461e-29	1.17462e-09	0.000857342	4.46601e-28	1.41457e-07	0.0325409
29456	15439	Hp	ILMN_2668509	CTGTTGTCACTCTCCTGCTCTGGGGTCAGCTTTTTGCTGTGGAGTTGGGC	8	112101403-112101452	1.50915e-55	2.45938e-06	0.0107254	5.34291e-54	0.000119617	0.220955
29457	15439	Hp	ILMN_2668510	CTCTCCTGCTCTGGGGTCAGCTTTTTGCTGTGGAGTTGGGCAATGATGCC	8	112101393-112101442	6.12472e-53	1.42562e-07	0.00505112	1.56244e-51	9.91603e-06	0.130399
29458	15439	Hp	ILMN_2944824	ACGAGTCCCGTTGGGGTCCAGCCTATCTTGAACGAGCACACCTTCTGTGC	8	112099370-112099419	3.83018e-53	2.86935e-07	0.0149102	9.99045e-52	1.84555e-05	0.276134
29690		Map3k6	ILMN_2770894	CCCAACCCCAATGGGTGGAACTAACTAGGGAGGCACCCAAAGGACACTAC			1.6722e-34	6.16295e-26	0.0304775	1.01242e-33	2.09379e-22	0.43357
29794	68118	9430023L20Rik	ILMN_1238679	CCTGGATGCAGCCTTTCCACCTGCTCTGGTGGGGTTCAAGTTCTACACTG	15	101121278-101121327	1.45416e-24	0.0112116	3.22793e-05	5.45307e-24	0.138671	0.00217183
30014	76974	Urah	ILMN_2734924	CCCATGGTCCTACACCACCTACCGGGGGAGTTAAAGTGATGTGTTACCTG	7	148023641-148023674:148023675-148023690	3.33254e-70	0.00902131	9.25133e-07	1.91013e-67	0.119523	0.000101766
30031	140887	Lnx2	ILMN_2779913	GATCCTGAAGTGCAATTGACGTGAAACAGTGTGTCCTGCTCCCCAGGTAC	5	147828980-147829029	2.19141e-32	1.4081e-05	1.45601e-08	1.18525e-31	0.000553475	2.8175e-06
30032	140887	Lnx2	ILMN_2598990	ACCTCCTCAGCCAGTATTGCTGGGCTTTGTATCCCTGTCGCTGGTTCTTC	5	147829215-147829264	1.87484e-30	1.52678e-05	0.000378096	9.1689e-30	0.000593425	0.0167356
30088	15945	Cxcl10	ILMN_3142803	GGAAGCTTGAAATCATCCCTGCGAGCCTATCCTGCCCACGTGTTGAGATC	5	92777116-92777165	8.86715e-12	5.1907e-11	0.00823536	2.03452e-11	8.21818e-09	0.183336
30122	60406	Sap30	ILMN_2694917	GGCCGACAGTGGTGTTCACTAGGAGAGATGCTGTTCACACTAGCCCATAG	8	59961682-59961724:59961725-59961731	7.42677e-45	0.0435317	2.53673e-09	8.95107e-44	0.328636	6.48958e-07
30142		Pde4b	ILMN_2544890	AGGGCATTTGGGGGTTTATAACACGTCCTTTGTGATGCTGACATGGTCTG			1.82683e-40	9.95143e-18	3.33789e-07	1.58895e-39	5.92909e-15	4.22187e-05
30583	27273	Pdk4	ILMN_1259322	GCAGTGACTTTCACAGCAGGACTTTGACTCCCACATTGGTTGATCACACA	6	5433734-5433783	2.99061e-30	3.39625e-16	0.000277088	1.44878e-29	1.53786e-13	0.0131656
30586		Sybu	ILMN_2747501	TAATTGTTCCAGCATTCCAATGCTCTTGTGCATAGCAGGGGACTGTAACC			4.28694e-51	5.22806e-07	1.14676e-10	9.15214e-50	3.13137e-05	4.15412e-08
30926	68738	Acss1	ILMN_2628174	CGTGGCTGAGTATAGTTACTGTGCCCTTTGAAATGGCCTAGGTTTCTAGG	2	150443912-150443961	9.98757e-60	1.05402e-07	1.23975e-06	6.78032e-58	7.5878e-06	0.000133342
31026	13077	Cyp1a2	ILMN_2795106	GTGGACCTGACACCCAACTATGGGTTGACCATGAAGCCCGGGACCTGTGA	9	57475397-57475446	9.41064e-76	0.00427932	6.16049e-12	4.26123e-72	0.0680857	3.40187e-09
31052		Rasgrf1	ILMN_2699663	GTCGCGTGCCTCTGTACTTGTTCTCCAGCGTGTGCTTCCCCGAGAATATA			2.06909e-52	8.12535e-05	0.0350304	4.98089e-51	0.00251804	0.469016
31093	72318	Cyth4	ILMN_2416628	CTTTGGTCCCTTTCCCCTCTCTGGTTCTCCACTTCTTCCCTGACACCAAG	15	78452323-78452372	5.36472e-47	4.52505e-22	0.411834	7.70441e-46	7.2818e-19	0.999997
31176	72388	Ripk4	ILMN_2774497	GTTGTACTCTGAGGAGTCAGATTCGATAGCCTTTTGTTGTACCTTCCCCA			3.12323e-56	3.67223e-08	0.00505813	1.22977e-54	3.0399e-06	0.130505
31330		F10	ILMN_2688912	ACCCACAGCCGAGACCCCAAGGACAGCAGGTCCGCCCAATTAAAGCAGTC			2.81318e-63	0.000214161	1.48433e-06	3.46151e-61	0.00582778	0.000154866
31484	14229	Fkbp5	ILMN_2718266	GGAAGGTGCCCAGCACCCCTGGATTTTACATGTTCTTGTATTCAGTAATC	17	28537188-28537237	5.94421e-14	6.14528e-29	0.0014439	1.47825e-13	3.97521e-25	0.0489749
31522	21961	Tns1	ILMN_1229315	TTAGGCCAAAGGTCCTATGGTCCATTTGCAGGGTTGGAAAGGCCCTTGCC			5.30889e-43	1.02902e-11	0.0343875	5.58661e-42	1.90184e-09	0.464667
31524	18048	Klk1b4	ILMN_2697256	GCCCACTGAGCCAAGTGTCTACACCAAACTTATTAAGTTCAGCTCCTGGA	7	51466997-51467046	1.55489e-26	3.91656e-05	0.00298353	6.32189e-26	0.00133745	0.0869834
31528	235283	Gramd1b	ILMN_2646411	ATCAGGTCCCGAGACTACACAGCTGAGAGCGACGAGAAGAGGAACCGCTA	9	40105581-40105630	3.58288e-43	3.79824e-07	1.36209e-06	3.82002e-42	2.36247e-05	0.000143769
31586	13124	Cyp8b1	ILMN_2627744	CGATGCCCTTACTCCAAATCCTACCAGCTCAGACTCCAGGGATGTTGCTC	9	121823516-121823565	8.63266e-71	1.64961e-07	3.27265e-12	5.58422e-68	1.13348e-05	2.07382e-09
31610	218454	Lhfpl2	ILMN_2721357	GCAGAAGGGTCTTTAGGTGCTGGGAAGGAACTTGGGCACCACTTGATGTC	13	94965110-94965159	1.91067e-41	7.52876e-22	2.98543e-12	1.78312e-40	1.08463e-18	1.98799e-09
31661		D030063E12	ILMN_2419748	GGGATTCTGGGTCAGCTCTTACCCTTGGCAACATGTACCTGTGGAGTTTT			2.20692e-42	1.27258e-19	5.29658e-16	2.2148e-41	1.01094e-16	1.19917e-12
31735	12575	Cdkn1a	ILMN_2634083	CATCCTGGTCTGGACTGTCTACCCTTAGCCCGCACCCCAAGAACATGTAT	17	29237494-29237543	9.08298e-17	8.57578e-29	0.0496672	2.50601e-16	4.854e-25	0.572989
31823		Amica1	ILMN_1231204	TCTGGGATTTCCTCGGGCTGGGAATCTGCACTGATGGCTGAAGCTAGGCC			2.1039e-33	1.26236e-14	1.54456e-07	1.20059e-32	4.17233e-12	2.15862e-05
31854	231207	Cpeb2	ILMN_2589667	CCCAGCTCTCGATACATGCATCGTTATCAGCAGCCAAAACACTACAAGCC	5	43677293-43677342	8.4699e-20	5.44575e-07	1.62397e-07	2.62222e-19	3.25745e-05	2.24877e-05
32040	109222	Rarres1	ILMN_2664202	ATTGGGCTCCCTGATTGGGCTCGGCAGGCTCAGCACATCTACCACATAGC	3	67283130-67283179	1.69838e-65	7.19351e-06	2.26804e-08	3.20435e-63	0.000308748	4.09159e-06
32074	231238	Sel1l3	ILMN_2663281	CTAGGAAATCTTTACCGTTTAAGTGTAGTCTGCTTCCCCATGAGTCACCA			2.13594e-66	7.68288e-13	2.39091e-09	4.67235e-64	1.67254e-10	6.1513e-07
32164	12944	Crp	ILMN_1247653	ATCTGTACCTGAACTTCCCCAGTCCATGAGTCAATAAAGTCACCTTTGGC	1	174630079-174630091	1.43793e-63	3.77855e-07	8.26364e-06	1.86564e-61	2.36166e-05	0.000694222
32173	75013	4930502E18Rik	ILMN_2858477	CCTGCTAGTGGCTTTGTTTATTGATTGAGAGACATGCAGAGGGAGGCCAG	X	51041342-51041391	7.578e-18	0.625873	3.96953e-07	2.1759e-17	0.921931	4.87111e-05
32256	243373	AI854703	ILMN_2725719	ATGGTTGGATATTCCCAAAGGTCCCTGATATCTGTTGGAGGAGGTGACTC	6	48583618-48583667	2.305e-52	0.0146337	4.66611e-10	5.51362e-51	0.16628	1.49007e-07
32273	216505	Pik3ip1	ILMN_2769772	CTGGGCCCGAGGGTCTCTTCCTATCTCGTAAGGAAAGGGAAGAATTGCAC	11	3242289-3242338	5.07173e-24	0.000206195	0.00233475	1.86225e-23	0.00564442	0.0719184
32290	11720	Mat1a	ILMN_2678460	GATGCTGTGTGTGACTTAGAAGCTTGAGTCTTTCCATAGGGTTCGGAGCT	14	41937430-41937479	4.28635e-71	2.82571e-08	8.61885e-14	2.986e-68	2.43253e-06	1.08408e-10
32292	114332	Lyve1	ILMN_2483304	CTGATATTACTCAACACATTCTCATGTATAGCGGAGTGTGGGCTGAAGCT	7	117994396-117994445	1.81786e-40	1.15674e-05	0.105271	1.58145e-39	0.000468921	0.836277
32307	66825	Rnf186	ILMN_2663996	CTCAAGGGTGGTGGGGTCCCTACCCCTATTCCAGAGCTCCTAAGTTTTGT	4	138524156-138524205	1.09754e-41	0.295672	1.87696e-07	1.04429e-40	0.762737	2.56769e-05
32316		Rnf169	ILMN_2760568	GGGACTTGGGACAAGGTATGCCCTGTCAGGGATGCTTTTACCACAAAGGA			3.56456e-19	1.58732e-41	4.12925e-16	1.07748e-18	7.18754e-37	1.07795e-12
32504	381530	Mup20	ILMN_2881950	GAATTTCTTCCTCTTCCTGTTCAATAAATGATTACACTTGCACTTAAAAA	4	61618148-61618150:61711268-61711314	3.21285e-56	0.00695806	6.54536e-09	1.26067e-54	0.0979689	1.44576e-06
32508	20671	Sox17	ILMN_2747986	GGGCTACACGAGATTTTTGTTTTAAATGCCTTGAGGGACTTGCTCCCCAC			4.7853e-45	9.99105e-08	5.56556e-10	5.86264e-44	7.23847e-06	1.7501e-07
32569		Stim1	ILMN_1216313	GGCACATGATTATTGTCCCGACACTCAAGAGGCAGAGGTAGAGGCAGGTG			6.66878e-19	2.71453e-08	0.000116166	1.9928e-18	2.34574e-06	0.00647002
32603		A530020H22Rik	ILMN_1245693	CTTCTGGGAGAATCACCATTCCTGTTCCAAGCAGTTCTATAGAGCAGTCA			1.37443e-36	0.0257331	3.78832e-05	9.34751e-36	0.239511	0.00249693
32741	227231	Cps1	ILMN_2913078	GTGGCTTGGCCATCTCAGGAAGGACAGAATCCCAGCCTCTCTTCCATCAG	1	67274870-67274919	9.26913e-64	0.00042782	2.14477e-08	1.24915e-61	0.0105563	3.90029e-06
32742	227231	Cps1	ILMN_1252849	CGCACTGTGGACTCCAAGAGTCTGTTCCACTACAGGCAGTACAGTGCTGG	1	67276858-67276907	4.00937e-65	5.68338e-05	8.91427e-11	7.06413e-63	0.00184347	3.33053e-08
32948	100046025	Ppfibp1	ILMN_1220307	CTGGGGGACAGGTGGACAGGTCACTTTACAGTGATAGATCTGGTGATAGC			2.67206e-33	1.54137e-05	1.21554e-07	1.51564e-32	0.00059756	1.74179e-05
33027		S1pr2	ILMN_2773936	CATATAGCTTCCCAGATGTCCTCCTTGTGCTGGAAACCCAGATCTGGGCC			1.57517e-43	3.06915e-17	7.10668e-07	1.72408e-42	1.65445e-14	7.96529e-05
33265		Arrdc3	ILMN_2666279	TGAGGGCCACAGTCATGCTCTAGTATTCAAGATAGCTTCCTAATTTTTCA			4.24433e-16	0.000159836	3.33577e-07	1.14295e-15	0.00452629	4.22187e-05
33267	12279	C9	ILMN_2937375	TGATAAGACTGACTTCGCCAACTGGGCCTCGTCCCTGGCAAACGCTCCAG	15	6441473-6441522	5.13813e-63	0.00616147	1.49521e-08	6.01188e-61	0.0896233	2.85674e-06
33561	329910	Acot11	ILMN_2799351	CAGGAGGTTCAGGGCTTCCTTCATCCCCAGATACATAGCAAGTGCAGGGC	4	106417596-106417645	1.63465e-24	0.000136107	0.000512037	6.11978e-24	0.00394561	0.021488
33569	20698	Sphk1	ILMN_1232884	GGACCAGTTGCATATAGAAGACACTCCCCATTGCTCTTAGGGACCTTCCC	11	116397901-116397950	3.30372e-42	7.74731e-15	7.4028e-08	3.27846e-41	2.63764e-12	1.15588e-05
33577	66976	2410002F23Rik	ILMN_2965641	GCTGCACAGATGGCCCCTGGCCAATGCAGATCTGGATTTAGTGGAGGGGT	7	44120243-44120292	2.5082e-49	1.26205e-08	1.11189e-09	4.46263e-48	1.19805e-06	3.18654e-07
33578	66976	2410002F23Rik	ILMN_2629648	TGGATTTAGTGGAGGGGTGAGGTGGGCAGCCCTGGAACTTCTGCCTTCGT	7	44120275-44120324	5.05237e-53	2.47864e-10	2.72274e-11	1.29883e-51	3.50735e-08	1.22068e-08
33624	64381	Ms4a8a	ILMN_1256614	CATCAGTATCTCATCAGGATACATCTACCCTAGCTACTACCCTTACCAGG	19	11145214-11145263	4.96106e-44	1.6098e-12	5.83446e-07	5.60204e-43	3.32847e-10	6.68836e-05
33673		Ccl7	ILMN_2771176	GGAAGTCTGCGCTGAAGCCCATCAGAAGTGGGTCGAGGAGGCTATAGCAT			3.59612e-10	8.24326e-05	0.186961	7.79268e-10	0.0025444	0.999997
33720	328561	Apol10b	ILMN_2756223	CTTAACGGGGTGGGATAAGGTCCTGAGATAACAATTCCTTCACTTTCTGG	15	77411447-77411496	7.07107e-16	9.79878e-10	9.00647e-06	1.88822e-15	1.21229e-07	0.000743972
33883	11604	Agrp	ILMN_2703427	TGCCTTTTGCTACTGCCGCAAGCTGGGTACGGCCACGAACCTCTGTAGTC	8	108090663-108090712	9.91048e-48	1.22417e-05	2.07727e-09	1.51453e-46	0.000492482	5.43378e-07
33927	226178	Wbp1l	ILMN_2416424	CTGAGCGGTCTGGGTGACGATATCCTGTGATTGTCCGGAAGACAGAGTGG	19	46731777-46731826	1.11621e-43	4.98769e-15	2.99913e-08	1.23426e-42	1.77833e-12	5.21792e-06
33941	665946	LOC665946	ILMN_2588070	CTGGCACTCACCAATCACAGTGACTCTCCACTGGCACTCACCAATCACAG	16	17860830-17860879	3.237e-20	6.08532e-07	5.6797e-13	1.01873e-19	3.59255e-05	5.24862e-10
34082	77036	1700109H08Rik	ILMN_1225045	GCCCTGGTGTTCAAAAACAACCCCCCTGCCAGTCTCTGAACACAGATTGC	5	3584258-3584296:3584297-3584307	9.76646e-19	5.30842e-15	5.54405e-07	2.90238e-18	1.87789e-12	6.40408e-05
34133	20306	Ccl7	ILMN_2835117	ACGGTCCTAAGGGATAGGAGCTGTCTGTAGGAATGTGAAACAGTCACGCC	11	81860688-81860737	3.96377e-09	8.13006e-05	0.0676988	8.23923e-09	0.00251804	0.678197
34275		Ppp1r3g	ILMN_1238021	GTCAGCTTGTCCTTTTAACTGGGCTCTGGAAACACCTCCCCAGATTCGAT			2.27604e-40	0.0138691	5.78334e-14	1.9657e-39	0.160657	7.61347e-11
34333		Itih3	ILMN_1231336	CCATACCGACTATATTGTTCCCAGCTTGTTCTGAGTAGCATGTCAGCTGC			5.01504e-72	5.55239e-08	8.51941e-06	4.73096e-69	4.29603e-06	0.000708681
34909	66214	Rgcc	ILMN_2593774	AGCCATTGGGCCCATCTCTGGGCAGTTCGGAGAGTGAAGCTCACTTTGTT	14	79688746-79688795	2.58244e-55	8.7698e-22	9.44543e-05	8.82533e-54	1.10307e-18	0.00546231
34928	22695	Zfp36	ILMN_3162407	GCAAATAGCCAAAGCCATTGCCAAATCCCTTCTCCCCCAACCAGTGGGCC	7	29162005-29162054	3.46862e-19	1.86959e-11	0.00973658	1.04904e-18	3.24356e-09	0.206212
34931	16619	Klk1b27	ILMN_3009447	TGGGGCTCTATCCCATGCGCTAAACCCAATGCGCCAGGCGTCTTCACAAA	7	43924609-43924658	2.66576e-49	8.55505e-08	1.42798e-06	4.72809e-48	6.26831e-06	0.000149676
34987	20677	Sox4	ILMN_2727116	ACTTTGAGAGCATGTCCCTGGGCAGTTTCAGCTCCTCATCGGCGCTCGAT	13	29043705-29043754	9.64992e-25	1.23309e-08	1.37573e-17	3.64648e-24	1.17302e-06	7.41781e-14
35178	73102	Slc22a23	ILMN_3142391	CCCACGTCACTACTTTCAAGGCTTCTTCTGTGAGCGGCCTTCATTCGCCC	13	34186949-34186998	8.91677e-44	0.00104048	5.07122e-06	9.91797e-43	0.0220364	0.00045926
35247		Kcnk1	ILMN_2777530	CCCACCTCACACTAAAGCACAATGGCAGTCCCCCTCTCCCCTGAACAGAT			1.44367e-51	4.43823e-14	2.24062e-06	3.2139e-50	1.33978e-11	0.000223968
35354		Lrrc16	ILMN_1224957	TGCCCGTGCAGTCCACTATCGTAGTTGGGAGTTTTGTACATCAGTCAGTT			9.48025e-33	1.41505e-08	0.00042208	5.2236e-32	1.32113e-06	0.018251
35409		Adamts9	ILMN_1257724	GATTAGGAAAACCCTGACAGTATTCCCCAACTCCACAGAAATGCCAGAGC			5.79757e-38	1.30202e-19	0.106677	4.26584e-37	1.0165e-16	0.841537
35467	110596	Arhgef28	ILMN_1229911	CGGGCCATCAGAGACCTGCTCTCCAAGAAAACAGCAAGGAGTCTTATAAA	13	98699369-98699418	6.61387e-48	1.85199e-08	3.67714e-08	1.02774e-46	1.6772e-06	6.18976e-06
35484	100046232	Nfil3	ILMN_2595732	AGTCATTTCACTGTAGTGTGCACAACGGCGTCTGTCTGGGTGTCCTTGTG			1.37345e-42	1.94022e-22	3.4643e-11	1.40196e-41	3.5142e-19	1.47208e-08
35501		Cyp24a1	ILMN_2639900	GCCAAAGATGTAGTTCTGTAGTAAGAGTTTTTGCTTGGTCCATGTGGGGC			2.49861e-33	0.332254	1.94224e-05	1.42046e-32	0.789286	0.00141393
35643	11655	Alas1	ILMN_2664040	CTCAGTTATTCACAAACCCCAGGCCATTACCATACCCACATAGTAGCCAG	9	106136311-106136360	9.8001e-57	1.52365e-06	4.24215e-09	4.17459e-55	7.83816e-05	1.01809e-06
35657	16644	Kng1	ILMN_2788223	CGCGGGACCATCGTCTTCATCACCCTGATCCTAGTGGAAATAAAATTCAG	16	23081702-23081751	1.77911e-58	0.00276908	1.13789e-05	9.90895e-57	0.0489409	0.000905529
35795	57259	Tob2	ILMN_1228501	TTCTCCAGCTTGCCCATCATTCTCGGCGCCCACACAGGTGACAGTCCCAA	15	81679613-81679662	2.04952e-08	3.29154e-09	0.0184454	4.13917e-08	3.53185e-07	0.316974
35867	18035	Nfkbia	ILMN_3001914	TACAATGGCCACACGTGTCTGCACCTAGCCTCTACTCACGGCTACCTGGC	12	56591795-56591844	6.68466e-26	5.80663e-20	0.0694637	2.65283e-25	5.05634e-17	0.686503
35910	110417	Plekhh1	ILMN_1238592	GGCTCATGTCTGGGAACCAACATTTAATCTCTCACTCTTCACCTAAGCCC	12	80182421-80182470	1.25997e-49	3.65036e-05	0.00262856	2.30703e-48	0.00126273	0.0784599
35920	381531	Mup21	ILMN_2818498	GCAGGTTGGTGGTCATGGAGAGGCCCTTCCAAATGCATTATTGTGCCCCC	4	61808888-61808937	7.92706e-68	5.04211e-08	3.88325e-12	2.52778e-65	3.97756e-06	2.31365e-09
36111	74747	Ddit4	ILMN_2993109	AGCCAGCCCATCCCGGTGCCCATGTACTGGAGGATTCAACTGTGAGGAGA	10	59345202-59345251	1.28789e-05	2.50157e-23	0.018054	2.29315e-05	5.39399e-20	0.312871
36164	13646	Klk1b22	ILMN_2946653	CCAGTGTGTGTCCATCAAGCTCCATCCTAATGAGGTCTGTGTGAAAGCCC	7	51371598-51371647	2.44798e-27	0.0500977	1.57187e-08	1.03152e-26	0.355857	2.95336e-06
36180	19416	Rasd1	ILMN_2647197	CTGTCCTGCTCGCTTCAGGGCAGGACTAATAATAGGGCATTATCTTGTCT	11	59779644-59779693	3.25726e-25	0.808973	1.15491e-12	1.25525e-24	0.966464	8.57305e-10
36225	70784	Rasl12	ILMN_2836749	TGCAAGCCCCTAGTGTGTGCTTTGTAGACACCATCATCTGAACCCAGGAC	9	65260413-65260462	1.41374e-49	2.28358e-08	4.30897e-12	2.57816e-48	2.01959e-06	2.50147e-09
36227	72999	Insig2	ILMN_2690256	ACGCCTGCCATGTATTTATGGGTTAAGTCGATCAGCTGACTCTCCGCTCG	1	123201414-123201463	1.8077e-43	1.25175e-05	6.96465e-08	1.97287e-42	0.000501685	1.09884e-05
36308	212980	Slc45a3	ILMN_1218226	GTTCCTGCTCAAGGATTGGGACCCAAGGTCTCCACAGCATACCAAATCCC	1	133879104-133879153	1.17819e-36	2.78369e-14	0.000151688	8.04185e-36	8.69297e-12	0.00805225
36439	108960	Irak2	ILMN_2937735	CCGGTATTTAGGAACTGCCTGCTTTTCACCTTCGACCTCCCATTGTGCCC	6	113660132-113660181	3.23638e-21	0.009333	1.12519e-09	1.06078e-20	0.122424	3.20437e-07
36440	108960	Irak2	ILMN_2937738	CAGAGCTGCTCTATTCAGCTCTTGGGAGGATGGGTGCAGCGGCTGCAGAA	6	113660350-113660399	8.67812e-22	0.00931296	4.87184e-11	2.90647e-21	0.122319	1.96966e-08
36442	13170	Dbp	ILMN_2616226	CCAGTGGTCTGGCCAGCTAGGTGCCCGAAGAACGTCATGATGCAGACAAA	7	52965323-52965372	1.17263e-40	1.25293e-17	0.000158964	1.03183e-39	7.36805e-15	0.00834489
36470	60533	Cd274	ILMN_1226800	CCCCCGGTGGAACCCCCTCTGTTACCTGTTCACACAAGCTTATTGATGAG	19	29462325-29462374	1.09331e-39	4.13516e-22	8.78911e-11	9.02079e-39	6.93498e-19	3.3165e-08
36483	19419	Rasgrp1	ILMN_1246609	GTCTGTGAACAGCAATGTCTCTGCTCTTCTTCTCTGTGGAGTGACTCACC	2	117105868-117105917	8.4122e-56	3.83569e-12	0.000948914	3.08182e-54	7.68513e-10	0.0354227
36636	23882	Gadd45g	ILMN_2903945	ACGGATCCCGGGCAATGCTTTCATTTTCTAAAGGACGCTATCGTGGAAGC	13	51943769-51943818	2.17073e-25	7.32436e-26	2.39868e-05	8.43569e-25	2.21103e-22	0.00169445
36637	23882	Gadd45g	ILMN_2744890	TTTGTTCTGCGAGGAGAGCCGCAGCTTCAACGACTGGGTGCCCAGCATCA	13	51943291-51943340	7.61752e-21	3.00461e-22	3.2256e-05	2.45833e-20	5.23277e-19	0.00217183
36730	216456	Gls2	ILMN_2840975	ACCTCCAGATACAGCTCGAGAGTAGCCCGGGTCTTTACCCAGGTCCCCTT	10	127612616-127612665	1.49945e-58	0.666549	4.78806e-07	8.45538e-57	0.933196	5.69051e-05
36888	20361	Sema7a	ILMN_2790357	GTCCATAGATTTCAGCAGAGAGCTGACCCTTCTCCAGCTGTGTCTGGGGC	9	57810525-57810574	4.30967e-34	1.47711e-05	0.0109047	2.55093e-33	0.00057759	0.223936
37045	16206	Lrig1	ILMN_2640862	CCTTACCGGTGAGACTGGGCTTGGACTGTACAAGACTTGAGTCCTAGACC	6	94554936-94554985	2.981e-41	3.35155e-08	2.04276e-09	2.74858e-40	2.8261e-06	5.37781e-07
37060	216810	Tom1l2	ILMN_2498659	GCGAAGTTACTGAAGACAACTTAATAGACCTGGGCCCCGGCTCCCCCGCT	11	60058630-60058679	5.55481e-38	7.08395e-16	6.35216e-13	4.09254e-37	2.99783e-13	5.75264e-10
37164	19252	Dusp1	ILMN_2622983	AAATAGACCCAGAGCAGGTTTGCTTTCGGCACTGACAGACAAAGCCAGTG			1.05504e-24	3.26969e-18	1.36476e-05	3.97879e-24	2.14572e-15	0.00106145
37182	22262	Uox	ILMN_2519536	TTGTAGTGGTATGTATGTGGAGTCCCATGTTAGCAGGCCCAACCTGCTCC	3	146534551-146534589:146534590-146534600	1.27936e-71	6.99598e-08	4.02218e-14	1.09303e-68	5.28857e-06	5.69151e-11
37363		Fam110b	ILMN_2766755	GGGTGGGTCTGTCTGTGCATACACAGTTGTGAAGGTTGTGAGGTCTCCTT			3.89708e-52	1.7444e-16	2.37205e-11	9.08201e-51	8.06004e-14	1.09601e-08
37384		C2cd4a	ILMN_2581989	TGGCCCAGAGACACTTGTAGCCTCCTCTTGGTCCTGGAACACTTGCAGCT			6.57982e-40	4.66611e-08	2.02429e-17	5.51742e-39	3.71329e-06	9.1662e-14
37507		Bhlhe40	ILMN_1218890	TCCTCTTGCCCAGCAGTGGATGGAGCGTCCTTGCTAAAAAGGGTACCTGC			1.32383e-20	3.30238e-15	1.3528e-05	4.23126e-20	1.23583e-12	0.00105614
37543		CKLF5	ILMN_1239969	CCCTGGACTTCAACTCATGTCGGCACTAAGCAACTTCCTGGGAGACTAGG			3.01934e-35	1.63397e-11	1.48855e-16	1.90469e-34	2.87891e-09	4.49355e-13
37642	20893	Bhlhe40	ILMN_1249378	CTAGGGAGAGGCGAGGTTACAGTGTTTATATTTTGGAACCTTCCTGAAGG			6.87939e-14	8.19024e-07	0.39064	1.70595e-13	4.64158e-05	0.999997
37650		Il1b	ILMN_2777498	ATCCGTGTCTTCCTAAAGTATGGGCTGGACTGTTTCTAATGCCTTCCCCA			3.54228e-22	8.65969e-14	6.19528e-05	1.20356e-21	2.39309e-11	0.00381672
37739	80885	Niacr1	ILMN_2847115	CCCAGATGTCACTGATAAGCCAGTTGGTCACTTGTGTTCGGTGGGACCAG	5	124313892-124313941	1.25855e-30	3.00791e-10	4.85571e-05	6.20991e-30	4.24303e-08	0.00308675
37761	672274	LOC672274	ILMN_2505185	GTCGCTAAATATAATTGTTTCAGTCCTATGGCATGGTGATAGCATATGTG			3.58524e-14	5.47806e-05	2.98707e-09	8.98663e-14	0.0017897	7.43174e-07
37804	66329	Susd3	ILMN_2706550	GCAAGCCAGGAATTCAGCACAGCCAGGCCCATGACAACCACAGCTTCACC	13	49332794-49332843	3.10279e-41	0.00453413	3.38347e-05	2.85622e-40	0.0711893	0.00226637
37985		Spata13	ILMN_2751037	ACAAATCCAGGCTGCGGTGCTGTGGTCTGTAAGAGTCAAGCTGCTGAGCT			7.20707e-58	9.42826e-07	3.70672e-07	3.65856e-56	5.23188e-05	4.59847e-05
38041	12702	Socs3	ILMN_2618176	CCCCACTCAGGCCTTCGAGGCTGTCTGAAGATGCTTGAAAAACTCAACCA	11	117827500-117827549	1.50886e-15	3.37687e-11	0.317175	3.98198e-15	5.54014e-09	0.999997
38083	244757	Glb1l2	ILMN_2755372	CTCCTTGGCATGTCATTGCATTCAGAGCAGTCCAATCTCATGCTGGTAGT	9	26571150-26571199	1.96511e-53	4.85088e-05	0.000491632	5.33147e-52	0.00160682	0.0207858
38127	11861	Arl4a	ILMN_3066763	GAGAGACACATCAGCCAATGTCCCTCCATTGGAATCCCGACTCCAGCCCG	12	40763853-40763902	8.78596e-28	7.24027e-09	0.0519967	3.77813e-27	7.17388e-07	0.588377
38195	76615	Got1l1	ILMN_1246289	CTACTTGCCCAAAACTAGCCGGATCAACTTCACCTGCATCAATGCCAGGA	8	28308066-28308115	8.80656e-34	2.6213e-07	2.46213e-07	5.13019e-33	1.7005e-05	3.27906e-05
38576		Tnfsf10	ILMN_2487554	CCCAAGGGAGGGCTCTGTGACGTCTGGAGTCTCAACAGTTTGGTCTTTGC			3.2786e-17	9.76343e-14	3.05379e-06	9.19589e-17	2.63154e-11	0.000293585
38584	194404	BC030863	ILMN_2626428	CTCTGCCTCCAACAGCCATCCTTAACGTAATTTTGACCAGCAGATGTAGA	6	120878790-120878839	5.04938e-27	1.5337e-15	5.72302e-11	2.09782e-26	6.09189e-13	2.27319e-08
38638	20701	Serpina1b	ILMN_2659680	TCTTTGAAGCCGTTCCTATGTCTATGCCCCCTATCCTGCGCTTCGACCAC	12|NT_114988.1	75290-75339	3.435e-54	2.83891e-05	6.43416e-05	1.02464e-52	0.00101379	0.00394111
38688	54325	Elovl1	ILMN_3143506	AGAGGTCAGCAATAATCTGTCACTGTGGACTCAGGCTCCCTTCTCACTCC	4	118105065-118105114	3.11378e-47	0.00323832	2.44592e-05	4.55704e-46	0.0550843	0.00171446
38947		Plod2	ILMN_2770429	CTGCTTTACAAAGTGCTTCAAGCGTCAGCTCCAAGTGTCCTTATGTCAGC			4.06172e-28	1.55284e-05	0.000444806	1.77357e-27	0.000600975	0.0190551
38967	66532	Rep15	ILMN_2594066	GGGCTGAGTGACATGGGCAGAGTTTACATCCGCATCCTCTAAACTGGGCA	6	146981838-146981879:146981880-146981887	2.86748e-13	6.03425e-05	3.01914e-08	6.94791e-13	0.0019406	5.21792e-06
39150	69581	Rhou	ILMN_1237773	GAATTCTAAACGCATGTGCCTGGGTGGGACGTCAAGTCAGGGTTCTCATC			1.56855e-48	2.65141e-09	2.00878e-07	2.57021e-47	2.93542e-07	2.71521e-05
39292	624610	LOC624610	ILMN_2537948	GGGCAAGGACCACAGCCAACTTCCTCTTACAAGCCACACCGACTTTGTCC			5.38893e-32	1.4271e-11	3.53674e-07	2.85633e-31	2.54411e-09	4.42396e-05
39307	15460	Hr	ILMN_1220617	ATCCCAACTCCTCTTAGTGTCCAAGCCCCCAGGACAGAGCCTCACTGCCT	14	70973062-70973111	3.33375e-29	1.06658e-05	0.00451764	1.53379e-28	0.000437858	0.119657
39308	15460	Hr	ILMN_2800687	CACGTGCGCCAGCTCTTGTTATACTTAACAGTTCCTGCTGTGGTTTGGGG	14	70973266-70973315	7.6268e-49	4.76134e-14	0.000541946	1.29054e-47	1.41895e-11	0.0224313
39323	18948	Pnmt	ILMN_1238777	AGGCTGTGAGCCCAGATCTTACTAGCTTCCAGCGGGCTTTGCATCACATC	11	98249110-98249159	6.00904e-56	4.52909e-05	2.19221e-08	2.25431e-54	0.00151129	3.97062e-06
39328	12116	Bhmt	ILMN_2620994	ACCACAAAGAAGAAACAATGGACTGCTATTCTGTCTGCTTCTATTCCATT	13	94386885-94386934	6.16072e-59	0.0109301	0.000148837	3.71456e-57	0.136607	0.00794752
39595	12774	Ccr5	ILMN_2888191	CCACTCTGTTGCTCAGCTGGCGTCAAGCTCACGATCCTCCTGCTTACATC	9	11299-11348	6.84017e-15	5.45145e-11	0.00134004	1.76243e-14	8.60094e-09	0.0463193
39600	245038	Dclk3	ILMN_1245352	CAGGAGTGTGCTTCACATCGCTCAAGCTCCCCCACACAATGAATGAGGTG			3.30329e-50	0.000568024	6.22454e-07	6.43339e-49	0.0133337	7.08175e-05
39728	17841	Mup2	ILMN_2730208	TTGACCTATCCAATGCCAATCGCTGCCTCCAGGCCCGAGAATGAAGAATG	4	60149860-60149866:60149867-60149892:60150056-60150072	8.07352e-32	0.000118789	0.000378831	4.22828e-31	0.00350645	0.0167518
39729	17841	Mup2	ILMN_3143404	CATCAAGGAAAGGTTTGCACAACTATGTGAGGAGCATGGAATCCTTAGAG	4	60150082-60150131	2.57073e-42	0.000445197	0.000150667	2.56965e-41	0.0108967	0.00802631
39730	17841	Mup2	ILMN_3065459	TGAATTTCTTCCTCTTCCTGTTCAATAAATGATTACCCTTGCACTTAAAA	4	60147731-60147732:60148804-60148851	9.32766e-41	8.17002e-05	5.26773e-07	8.27681e-40	0.00252696	6.17948e-05
40052	53601	Pcdh12	ILMN_1245119	GGAGCTCCATCTTACGTAGCCAGGTGCCTGGCACAGGTGACACTTGAAAC	18	38426784-38426833	8.46894e-32	1.26817e-19	5.35534e-06	4.43127e-31	1.01094e-16	0.000481141
40128	14183	Fgfr2	ILMN_1225071	TTGCTTTGGATACGCCCACTCACTTTGCTACAGTCATGCGACATGTATGC	7	137306105-137306154	1.48827e-69	2.06826e-05	9.10588e-17	7.01983e-67	0.00077144	3.17172e-13
40176	16523	Kcnj8	ILMN_1253409	GCTGGGCAGCTGGGTAGCCTTTTATTCAGAGTCTGGGGCTTGAATTCATT			1.56001e-15	0.000855402	0.000129382	4.11385e-15	0.0187662	0.00704997
40504	209760	Tmc7	ILMN_2501267	TGCGGCTCTCTAACGGGTGTGTGTTAAACTCCTGATTCCGTGTCTTGAAA			1.40507e-47	2.07535e-09	0.00184528	2.1131e-46	2.37909e-07	0.0599784
40580	11807	Apoa2	ILMN_2775957	GGCAGACGGACCGGATATGCAGAGCCTGTTCACTCAATACTTTCAGAGCA	1	173155816-173155865	3.35437e-53	3.78154e-07	5.6839e-07	8.83076e-52	2.36166e-05	6.54892e-05
40581	11807	Apoa2	ILMN_1247156	ACTGTTCCTAGGCCATAGTCTGCCATCATGAAGCTGCTCGCAATGGTCGC	1	173155419-173155445:173155446-173155468	1.53802e-47	5.36112e-06	3.91055e-06	2.30225e-46	0.000238465	0.0003651
40690	20303	Ccl4	ILMN_1223257	CCCATGGAGATGGTCCACCATTGCTGTTTCTCTGCTATTGTGGATATGAC	11	83478086-83478135	2.93722e-11	1.3387e-09	0.0478043	6.61759e-11	1.5952e-07	0.561075
40789	110351	Rap1gap	ILMN_1227577	CTTTGGAAGCCCTGTGGCCACATGTATGTCAGTAAGGGTTGTACAAAATA	4	137285705-137285754	7.00271e-56	0.0187118	5.76841e-05	2.59272e-54	0.195273	0.00357807
40873	14608	Gpr83	ILMN_2707941	CAGCTTCAGTGACCTTGGCTCTATCCATGACCAGACAGGACCCATTTTGG	9	14673626-14673675	2.74698e-52	0.0021185	0.000167143	6.51919e-51	0.0392343	0.00867935
40949	15959	Ifit3	ILMN_2944666	CTGTGAGACAGATGTGCTGTGGAGTGCTGCTTATGGGGAGAATGTGCTGA	19	34662957-34663006	8.47167e-33	8.21346e-16	0.0116161	4.67698e-32	3.41205e-13	0.233981
41093	66333	Aqp11	ILMN_1225901	CCCAGCGCTGGCACTTTCTCTGCACTTTCCGTGCTTTGACGAACTCTTCT	7	104877519-104877568	1.75423e-47	7.00858e-15	1.02842e-06	2.61121e-46	2.42256e-12	0.000112482
41094	14161	Fga	ILMN_1232567	GCGAAGTGCTTACCAGGCACGCTGCACCCGTTTCCTAACCTCCTTTAGTG	3	82835972-82836021	2.81983e-62	7.90021e-07	1.43174e-09	2.86932e-60	4.51109e-05	3.90545e-07
41189	68939	Rasl11b	ILMN_2706819	GCAGGGCTACCTGCCGAATCCCCTACACAGATGCACTTTAAGAAGCCGTT	5	74595389-74595438	1.56338e-27	1.03042e-06	4.02527e-12	6.64958e-27	5.60123e-05	2.36712e-09
41190	68939	Rasl11b	ILMN_2793062	ATGGCAATGACGTTGGGTTGCTTCCTGGGCCTGGCTGAGTCGTGGCTATG	5	74595297-74595346	9.55207e-23	0.000146976	1.00134e-08	3.33021e-22	0.00421749	2.08948e-06
41222	53412	Ppp1r3c	ILMN_2667091	GATTGTCCGGTGTGCATGTACTTTGAGGTGAGTTGGGAAAGTGCAGTGGA			3.54599e-42	3.40651e-07	3.69758e-07	3.51195e-41	2.16043e-05	4.59847e-05
41229	382571	Kcnf1	ILMN_2657243	CAGCTGGAGCCTGGGGCTGCTAATCCACAAAATGGCTTTGAACTATCAGA	12	17179085-17179134	1.21585e-39	0.00717666	6.85559e-05	9.98277e-39	0.100206	0.00417242
41373	107652	Uap1	ILMN_2502542	GGGCCACATAGGGAGCCGTTGTTTTGGTAGATCAATTGTGAACCTGTGGG			2.66154e-31	0.0203183	2.60619e-11	1.3584e-30	0.206638	1.18011e-08
41464	21885	Tle1	ILMN_1230788	GTCACTGGCTCAGGGGACAAAAAGGCTACCGTTTATGAGGTCATCTACTG	4	71779317-71779317:71779318-71779366	4.47754e-36	1.05827e-12	0.000332576	2.95507e-35	2.25743e-10	0.0152732
41517	107141	Cyp2c50	ILMN_2996640	GATCACCCTGAGGCTTTAATTCACTGCTTTCCACACTGGACATACTGCTT	19	40188143-40188192	2.8318e-73	2.17987e-05	8.60919e-13	3.88566e-70	0.000804454	7.08787e-10
41770	231396	Ugt2b36	ILMN_1235719	TGGATGTGATTGGATTCCTGCTTGCTTTTGTGACATTCATTGTAGCCCTC	5	87495284-87495333	1.45466e-67	5.27927e-05	4.60945e-13	4.27126e-65	0.00173225	4.34834e-10
41779	75458	Cklf	ILMN_3149944	GTCGGCCCTTCTGCTGTACTCTGAAATGCTTTGTGAAGTTCCTGCGGTTG	8	106774946-106774995	2.42425e-45	3.03446e-06	8.85884e-13	3.03743e-44	0.000144029	7.16317e-10
41787	241296	Lrrc8a	ILMN_2895213	ATTTAGAGGCAGATTGGGCATGAGAGGTCAGCACTGGGAGGGCAGGCTCC	2	30118916-30118965	4.34034e-19	7.51289e-14	0.0053409	1.30736e-18	2.11299e-11	0.135637
41789	14219	Ctgf	ILMN_2909150	AGAAATGGCTGGCTCAGGGTAAGGTCCGATTCCTACCAGGAAGTGCTTGC	10	24318316-24318365	1.83354e-29	2.05395e-09	0.429605	8.54602e-29	2.36654e-07	0.999997
41929	17837	Mug2	ILMN_2685043	ACTACTATGAGACAGATGAAGTGGCTTATGCTGAATACAGCAGTCCCTGC			2.36038e-69	0.00203785	1.64398e-06	1.04785e-66	0.0380834	0.00016926
42066		Cul3	ILMN_2487814	TCCTCTGTGCTTCCAACTATCACTGAAGTCTTCTACCTGATTGATCTGCC			1.48381e-31	0.00682497	2.65598e-06	7.67342e-31	0.0965755	0.000260879
42067		9930013L23Rik	ILMN_1245549	ATTAGAGGATGTCCTTTGGACCACCGGAAGGAGGTGTGCCCAGAGCCAAG			2.99557e-45	2.68815e-09	2.21145e-12	3.7244e-44	2.96161e-07	1.56464e-09
42217	26459	Slc27a5	ILMN_2847061	TGCTGACCCCCTCTACATACTGGACAACAAGGCCCAGACCTTCCGGAGTC	7	13573874-13573923	9.92323e-63	0.00155115	5.08794e-05	1.08798e-60	0.0306447	0.00321769
42420	69276	Sec62	ILMN_2543851	GAAGACCACGGAGGCCGCCCCCAGCCCAGAGCCCGCGGCGGGTTACATAA	3	30692130-30692179	3.09444e-41	2.17971e-09	8.47771e-12	2.84927e-40	2.46749e-07	4.4124e-09
42474	626152	Eppk1	ILMN_1243900	ACATGGTGTGTCTTGATTTGCCCTCTGTGTTAGGAATAATGTCGCTCATC			1.05497e-51	0.00608227	6.66261e-08	2.36955e-50	0.0886993	1.05856e-05
42490	11931	Atp1b1	ILMN_2767615	GTGATGGGTTGTGTTGTGCTCCGTGCTGAATGCTGTCTCGCCATCTCTCC			5.58231e-59	0.00196814	4.00498e-07	3.38384e-57	0.0370581	4.90134e-05
42492	68054	Serpina12	ILMN_1218236	GACCCTTCCTCATGATGATCTATGAGAATTTCATGCCTTCCATGGTCTTC	12	105269258-105269307	7.90526e-74	3.08301e-08	1.40078e-08	1.37676e-70	2.62409e-06	2.72226e-06
42756		Nfkbia	ILMN_1218605	GAGGCCAGCGTCTGACATTATAAGTGGAAAGTGGCAAAAAGAATGTGGAC			2.48387e-11	1.06293e-06	0.461536	5.60902e-11	5.73666e-05	0.999997
42909	226040	Tmem252	ILMN_2599686	AGATCATAGCAGATGCAGGGGCTCCAGCGAAGGCACAGGATGCTGAGGAG	19	24752193-24752242	2.75226e-51	4.9338e-18	4.28505e-16	5.96578e-50	3.14658e-15	1.07795e-12
42953		Pck1	ILMN_2777986	ATTGGTATCCGGACCACTTCTTGGGAAAAAAATTACAAAATAAACTTTTA			1.88265e-57	0.0644299	0.000156076	8.96407e-56	0.41033	0.00821778
43077	66182	Arl4d	ILMN_2622354	GTGCATTTGGGGGTGAATTGAGAACATCTCCACAGTCGAGGAGAGGGGTC	11	101483683-101483732	1.22599e-22	9.47988e-14	0.0209042	4.25558e-22	2.58589e-11	0.341705
43124	66277	Klf15	ILMN_1235255	ATGCTGGGAAAAAGGAAGTGGGTCAAAAAAGCGTAGGGCTGCACTGTGAT	6	90424670-90424719	3.96495e-23	5.29865e-10	0.0207605	1.40461e-22	7.01544e-08	0.340231
43290	16529	Kcnk5	ILMN_1232263	GGCATATAGGGCCAGAGCCCCCACACGTTAGGACAGTGAGAGGTGTGTAT			2.66289e-55	7.95292e-05	8.47708e-12	9.07287e-54	0.00246993	4.4124e-09
43388	11625	Ahsg	ILMN_2764036	TTCAGACCACCGAACTTACCACGACCTACGCCACGCCTTCTCTCCTGTGG	16	22898983-22899032	3.57067e-63	3.20585e-07	2.04274e-11	4.32309e-61	2.04456e-05	9.63513e-09
43389	11625	Ahsg	ILMN_2993745	CCCACTGACCTCATATAAAACAGTTGCAACCACGACTCTGAAAGGTGCTC	16	22899391-22899440	1.31417e-56	1.9027e-09	4.70829e-11	5.46437e-55	2.20348e-07	1.92069e-08
43450	104582	Rprml	ILMN_2968147	GCCAGCTCCAAGGAGGGCTCAGGGAAGAGGTGCATCGCTGAGATTTTGCA	11	103466550-103466599	3.1545e-48	1.16483e-11	4.44118e-07	5.0207e-47	2.10979e-09	5.3627e-05
43588	20680	Sox7	ILMN_2889482	CACCCTGTGACACCCAAAGATGTTTCTGAGCTTTGGTCGCACCCCAGACA	14	64569098-64569147	8.27095e-34	2.92528e-09	0.00390335	4.82625e-33	3.17649e-07	0.107315
43618		Arhgef39	ILMN_2659317	CTGTCTGTGGCCAGCGGTTAATCCCATTTGCAGCTTTGAAAAGGAGTCCA			3.68665e-34	0.00022558	1.42655e-05	2.19018e-33	0.00608366	0.00109323
43707		BC020108	ILMN_2472093	TGGCCAGGCTGATGGTTGTGGAGGAGCCTGTGAACTTGATTAAAGTGCCA			2.92465e-33	3.69687e-09	2.31931e-07	1.65477e-32	3.88394e-07	3.10712e-05
43733	11556	Adrb3	ILMN_2764057	TCACCTTCCCAGCCAGCCCTGTTGAAGCCAGGCAGAGTCCACCGCTCAAC	8	28337730-28337779	1.11677e-40	3.70182e-07	4.97811e-06	9.83629e-40	2.32164e-05	0.000452638
43746	22370	Vtn	ILMN_1234111	TAGAACCCGGCGAGTGGACTCTGTGAATCCTCCCTACCCACGCTCCATTG	11	78313715-78313763:78313886-78313886	3.23763e-59	4.19201e-05	1.30729e-09	2.02211e-57	0.00141656	3.59933e-07
43761	16169	Il15ra	ILMN_1249759	GCTGCGCCTGGACACAGGAGAAAGCCCAATGTGATAATAGAGGTCTCTGG	2	11654950-11654999	1.97494e-43	6.84274e-12	3.43168e-07	2.15021e-42	1.31291e-09	4.31638e-05
43848	21835	Thrsp	ILMN_1256775	AGACCTGGACAGAGGGCCTGGCCCCAGGTGGACGCGAAGGCGGCTTCCGT	7	104561924-104561973	3.70157e-63	1.35029e-07	0.00947151	4.46962e-61	9.47943e-06	0.202111
43891	268709	Fam107a	ILMN_2768972	GAGGAGTAGGACAGGACGTCTGGGATAGAGTAGGACCACCCAAGGGACTT	14	9129214-9129263	2.85399e-24	5.01059e-20	0.000310264	1.05797e-23	4.53769e-17	0.0144779
43933	17207	Mcf2l	ILMN_2847276	GTATGTCCAGGAAAAACACCCTCCTCCCCTGCCCTATGGCTTGCAAAGCC	8	13020401-13020450	2.56044e-33	2.37234e-07	1.30665e-05	1.45396e-32	1.55459e-05	0.0010272
43934	17207	Mcf2l	ILMN_2689784	TTTATGGTCTCACGCTGCTGAACATGTGTCACTTTACGGTCCCTCCCTGT	8	13020304-13020353	3.0471e-52	5.26075e-18	3.81732e-10	7.1825e-51	3.3085e-15	1.24354e-07
44046	213393	8430408G22Rik	ILMN_2894211	GTGACCACCTCCCAGATTGCTCTAATGAGGAGATGCGGGCTGTACTCTGG	6	116602629-116602678	1.92122e-38	1.55958e-19	7.30088e-06	1.46112e-37	1.19694e-16	0.000629698
44220		Map2k3os	ILMN_2693691	GGAGCAGATCAGGTAACATACAGGAAGCTGAGCACGAGAAGTGCTGACTC			3.87444e-28	0.395722	3.23216e-06	1.69457e-27	0.826813	0.000308117
44315	74646	Spsb1	ILMN_1224336	CCGTCACCAGCACCGTAAAGCCTTGTGGCATGTATAGTTCTGAAACCCCC	4	149270462-149270511	5.90124e-31	1.89388e-14	0.00141745	2.95984e-30	6.08203e-12	0.0482584
44394	12450	Ccng1	ILMN_2500276	AGCTCAGGGCCCTGGACAGCCTGAGTCAACCTAGAGTAGCTGGAACCATT	11	40562288-40562337	1.19911e-56	1.71588e-11	4.42278e-11	5.03214e-55	2.99987e-09	1.82062e-08
44505	94179	Krt23	ILMN_2671165	CCCCCTATGGAAAGTCTTTGTCTCCGCGCTAATGGGTGAGTCTCGACGGA	11	99339424-99339473	1.12199e-44	0.0128608	1.3594e-05	1.33136e-43	0.152129	0.00105947
44522	19261	Sirpa	ILMN_2722996	GCGCCCTGTGAGGAGTGGGATTTGTTTTTCTGTAGACCAGATGAGAAGGA	2	129457829-129457878	7.42401e-47	2.68776e-21	0.025958	1.05315e-45	3.12063e-18	0.395226
44528	628050	LOC628050	ILMN_1237349	CTGACCACGAAGATGAGGTTCCTTTTGTCTTTGGGTCCATGCTTTTTGGG			3.08797e-38	7.72247e-08	1.8857e-21	2.31385e-37	5.76081e-06	4.26933e-17
44782		Sema6a	ILMN_1214701	GACGCCGGGGTTTTGTGAGGCAAGCATGTGCTGTGTAGCATGAAAATGGC			8.38192e-41	1.34125e-17	1.81523e-10	7.46835e-40	7.78633e-15	6.22693e-08
44810		4930523C07Rik	ILMN_2553280	GCCCATGAAGTGATAGGCCCTCCCATAGACACCAGAGAGCAGAAGCCCAA			2.35284e-38	7.02132e-06	5.39299e-08	1.77891e-37	0.000302217	8.78418e-06
44830	17386	Mmp13	ILMN_2737685	CCACCATGTTTGTTAATCCCTCTCTGCTTTCCTTAGCGAGTAACACTTGG	9	7283143-7283192	2.83668e-28	1.06469e-13	7.57899e-08	1.2484e-27	2.83589e-11	1.17128e-05
44904	16616	Klk1b21	ILMN_2732087	ATGGCAAATCCCAAATGATCTCCAGTGTGGGTTCATCAAGCCCCTGCCTA	7	51361145-51361145:51361242-51361290	1.61324e-23	0.000116198	7.5801e-12	5.80815e-23	0.00344405	4.03805e-09
44905	16616	Klk1b21	ILMN_1219551	TGGGGCTCTATCCCATGCGCTAAACCCAATGCGCCGGCCATCTACACCAA	7	51361804-51361853	1.03248e-44	4.18336e-09	3.00162e-07	1.22902e-43	4.36467e-07	3.87226e-05
44906	16616	Klk1b21	ILMN_2651099	TCCAGTGTGGGTTCATCAAGCCCCTGCCTAATGAAAATTGTGCCAAAGCC	7	51361261-51361310	8.65632e-19	0.00114163	1.70125e-10	2.5767e-18	0.023702	5.88726e-08
44959	71690	Esm1	ILMN_1257574	GAGTTGTGAATGTACTCGTGGGAAGATCCGTGAATGTAAGCGCAACCGGC	13	114008196-114008245	1.81909e-48	1.32278e-11	0.00575307	2.96295e-47	2.37685e-09	0.143213
45084	353156	Egfl7	ILMN_3163288	GTCATCCCTAGATCCCTTGTAGCCAGAGTTCAGGCGCTGTCTGGTGGTGC	2	26447993-26448042	1.01537e-39	4.77748e-15	7.34492e-05	8.39454e-39	1.73063e-12	0.00442267
45092	17118	Marcks	ILMN_1256142	GCACATGAAGTTTGCAAGTCTCCACCCTGCCCATTTTTGTAAAACTGCAG	10	36854963-36855012	3.52726e-55	4.00511e-20	3.19104e-14	1.18397e-53	3.70113e-17	4.98254e-11
45150	13807	Eno2	ILMN_2763002	GTCCCACAGTTGCCACCATCTCCGTGGCTTTGAAATGACCACCACCATTA	6	124711155-124711204	1.11297e-56	0.258232	0.00010026	4.70117e-55	0.734947	0.00572492

## Sheet: Clusters
cluster_A	cluster_B	cluster_C	cluster_D	cluster_E	cluster_F	cluster_G	cluster_H	cluster_I	cluster_J	cluster_K	cluster_L	cluster_M	cluster_N	cluster_O	cluster_P	cluster_DOWN	cluster_UP
MEF2C	SOCS3	ID1	APLNR	PHLDA2	STAC2	THRSP	NEURL1	SERPINA1	PNMT	AGRP	GADD45B	FARP2	KCNF1	IRAK2	ARRDC3	MEF2C	THRSP
CHAC1	CCL7	RASL12	TNFSF10	SUCNR1	SSTR2	PEX11A	SERPINE2	FGG	PPP1R3C	BMP4	TOM1L2	PPP1R3G	CA9	ZNFX1	DUSP18	CHAC1	PEX11A
GBP6	ELOVL1	ADRB3	SOX7	SAP30	AK4P3	ZCCHC18	ATP1B1	APOC1	ABCC8	SLA	PLIN5	PLEKHF1	SOX4	NAPEPLD	TIPARP	GBP6	ZCCHC18
ACOT2	WNT3A	FFAR2	PLEKHO2	ARHGEF39	TMIE	ITIH3	RSPH4A	APOA2	TFCP2L1	VCAM1	UPP2	RHOU	GREB1	GOT1L1	RGS2	ACOT2	ITIH3
SPATA13	DOCK4	RASD1	NRARP	EVPLL	LHFPL2	ENO2	WFDC12	APOA1	TMPRSS2	LIMS2	SAA4	PLOD2	CKLF	LIMK2	LYVE1	SPATA13	ENO2
DCLK3	KRT23	CHST1	BHLHE40	SLC22A23	SEL1L3	CPE	GDF15	AHSG	INSL6	CHST15	ADH6	NHSL2	TSHB	FAM110B	RHOB	DCLK3	CPE
INHBE	SOX11	FFAR4	DBP	CYP24A1	TRIL	RASGRF1	LRTM1	AMBP	KNG1	PER1	SEC62	MT1M		FGFR2	TP53INP1	INHBE	RASGRF1
OSGIN1		RASL11B	SIRPB1		IGSF9	PDCD4	IGFBP1	KLK2	REP15	TXNIP	PRKAG3	GLDC		SYBU	ACSS1	OSGIN1	PDCD4
RNF186		FAM78A	CD83		LMCD1	TRNP1	INSIG2	LRG1	RGS9	ADAMTS9	EIF4EBP3	MCF2L		SNTA1	USP54	RNF186	TRNP1
		PLAU	CCR5		MARCKS	NETO2	FAM89A	ANGPTL4	MDM1	SEMA7A	PLK3	C15orf48		RPRML	SLC10A6	SOCS3	NETO2
		KBTBD13	IRF1		DDIT4L	MRAS	SERPINA5	PLIN4	TAB3	KCNK1	KCNK5	RAP1GAP		CPEB2	MAP3K6	CCL7	MRAS
		BAHCC1	EFNA1			GPR83	RARRES1	SGK1	ANKRD2	AQP11	TMEM100	NES		SOX17	SLC7A8	ELOVL1	GPR83
		NUAK1	SOX18			SYTL3	PKIG	WBP1L	CAB39L	PLEKHH1	TMC7	PMAIP1		KLRG2	SESN1	WNT3A	SYTL3
		EGFL7	CYTH4			PIK3IP1	DUSP14	HSPB8	CCNG1	CEBPB	CHST3			MTHFD2	FAM107A	DOCK4	PIK3IP1
		ZNF467	S1PR2				SLC25A15	ARG2	NT5E	ZFP36	PTPN22			PPP1R3B	MS4A6E	KRT23	NEURL1
		KIAA1217	PCDH12					ALAS1	PPFIBP1	TOB2	KLHL6			SDC4	DUSP1	SOX11	SERPINE2
		KCNJ8	PDE4B					SNX10	CCL17	GNMT	SERPINF1			FOS	DDIT4	ID1	ATP1B1
		SLC40A1	CD274					CDKAL1	SLC25A32	CSRNP1	ITIH4			GRAMD1B	TSC22D3	RASL12	RSPH4A
		CIITA	APOL2					TSKU		SPSB1	HP			APBB3	HIF3A	ADRB3	WFDC12
			FGF7					PIM3		TSC22D1	GLS2			SPHK1	ERRFI1	FFAR2	GDF15
			SEMA6A					EPPK1		USP2	NANS			NFIL3	FKBP5	RASD1	LRTM1
			MRGPRF					NPM3		SLC45A3	ACOT11			GADD45G		CHST1	IGFBP1
			DUSP4					SMOX		LPIN1	LRIG1			AFF1		FFAR4	INSIG2
			MEOX2					PPP2R3A		RAPGEF4	SGTB			STIM1		RASL11B	FAM89A
			IL33					TNS1		BCL2L1	TMEM252			ZBTB16		FAM78A	SERPINA5
			CD52					TMCC3			ANGPTL7			ARL4A		PLAU	RARRES1
			RASGRP3					GLB1L2			SUSD3			NET1		KBTBD13	PKIG
			CLEC7A					KLF15			MFSD2A			SLC25A33		BAHCC1	DUSP14
			IL1B								RIPK4			CDKN1A		NUAK1	SLC25A15
			RASGRP1								FBXO10			RGCC		EGFL7	SERPINA1
			ESM1								OBP2A			LCN2		ZNF467	FGG
			CCL4								CPAMD8			TES		KIAA1217	APOC1
			LBH								SLC27A5			MAFF		KCNJ8	APOA2
			MMP13								CRP			ARL4D		SLC40A1	APOA1
			ASB2								SLCO1B3			HSPA2		CIITA	AHSG
			LMO2								AQP9			ADRB2		APLNR	AMBP
			DAPK2								HAO1			TLE1		TNFSF10	KLK2
			CXCL10								SERPINA10			MRAP		SOX7	LRG1
			IFIT3								ORM2			LRRC8A		PLEKHO2	ANGPTL4
			RNF144A								F10			SLC16A9		NRARP	PLIN4
											SLC25A47			GDPD1		BHLHE40	SGK1
											APOC4			MS4A8		DBP	WBP1L
											CYP8B1			DCUN1D3		SIRPB1	HSPB8
											NRN1			LNX2		CD83	ARG2
											TF			SYDE2		CCR5	ALAS1
											PON1			KIAA0040		IRF1	SNX10
											PCK1			ENC1		EFNA1	CDKAL1
											BHMT			IL15RA		SOX18	TSKU
											HAMP			PDK4		CYTH4	PIM3
											APOH			RANBP9		S1PR2	EPPK1
											C4BPA			AMPD3		PCDH12	NPM3
											CYP1A2			ADAMTS15		PDE4B	SMOX
											CES1			RNF169		CD274	PPP2R3A
											RDH16			LARP4		APOL2	TNS1
											HSD3B2					FGF7	TMCC3
											F2					SEMA6A	GLB1L2
											C9					MRGPRF	KLF15
											VTN					DUSP4	PNMT
											ARG1					MEOX2	PPP1R3C
											ASGR1					IL33	ABCC8
											PLG					CD52	TFCP2L1
											CES3					RASGRP3	TMPRSS2
											APOF					CLEC7A	INSL6
											CPS1					IL1B	KNG1
											MAT1A					RASGRP1	REP15
											FGL1					ESM1	RGS9
											F9					CCL4	MDM1
											SERPINA12					LBH	TAB3
											CYP3A7					MMP13	ANKRD2
											CYP2A6					ASB2	CAB39L
											POLR3E					LMO2	CCNG1
											ARHGEF28					DAPK2	NT5E
											FGFBP1					CXCL10	PPFIBP1
											UAP1					IFIT3	CCL17
											CUL3					RNF144A	SLC25A32
																PHLDA2	AGRP
																SUCNR1	BMP4
																SAP30	SLA
																ARHGEF39	VCAM1
																EVPLL	LIMS2
																SLC22A23	CHST15
																CYP24A1	PER1
																STAC2	TXNIP
																SSTR2	ADAMTS9
																AK4P3	SEMA7A
																TMIE	KCNK1
																LHFPL2	AQP11
																SEL1L3	PLEKHH1
																TRIL	CEBPB
																IGSF9	ZFP36
																LMCD1	TOB2
																MARCKS	GNMT
																DDIT4L	CSRNP1
																	SPSB1
																	TSC22D1
																	USP2
																	SLC45A3
																	LPIN1
																	RAPGEF4
																	BCL2L1
																	GADD45B
																	TOM1L2
																	PLIN5
																	UPP2
																	SAA4
																	ADH6
																	SEC62
																	PRKAG3
																	EIF4EBP3
																	PLK3
																	KCNK5
																	TMEM100
																	TMC7
																	CHST3
																	PTPN22
																	KLHL6
																	SERPINF1
																	ITIH4
																	HP
																	GLS2
																	NANS
																	ACOT11
																	LRIG1
																	SGTB
																	TMEM252
																	ANGPTL7
																	SUSD3
																	MFSD2A
																	RIPK4
																	FBXO10
																	OBP2A
																	CPAMD8
																	SLC27A5
																	CRP
																	SLCO1B3
																	AQP9
																	HAO1
																	SERPINA10
																	ORM2
																	F10
																	SLC25A47
																	APOC4
																	CYP8B1
																	NRN1
																	TF
																	PON1
																	PCK1
																	BHMT
																	HAMP
																	APOH
																	C4BPA
																	CYP1A2
																	CES1
																	RDH16
																	HSD3B2
																	F2
																	C9
																	VTN
																	ARG1
																	ASGR1
																	PLG
																	CES3
																	APOF
																	CPS1
																	MAT1A
																	FGL1
																	F9
																	SERPINA12
																	CYP3A7
																	CYP2A6
																	POLR3E
																	ARHGEF28
																	FGFBP1
																	UAP1
																	CUL3
																	FARP2
																	PPP1R3G
																	PLEKHF1
																	RHOU
																	PLOD2
																	NHSL2
																	MT1M
																	GLDC
																	MCF2L
																	C15orf48
																	RAP1GAP
																	NES
																	PMAIP1
																	KCNF1
																	CA9
																	SOX4
																	GREB1
																	CKLF
																	TSHB
																	IRAK2
																	ZNFX1
																	NAPEPLD
																	GOT1L1
																	LIMK2
																	FAM110B
																	FGFR2
																	SYBU
																	SNTA1
																	RPRML
																	CPEB2
																	SOX17
																	KLRG2
																	MTHFD2
																	PPP1R3B
																	SDC4
																	FOS
																	GRAMD1B
																	APBB3
																	SPHK1
																	NFIL3
																	GADD45G
																	AFF1
																	STIM1
																	ZBTB16
																	ARL4A
																	NET1
																	SLC25A33
																	CDKN1A
																	RGCC
																	LCN2
																	TES
																	MAFF
																	ARL4D
																	HSPA2
																	ADRB2
																	TLE1
																	MRAP
																	LRRC8A
																	SLC16A9
																	GDPD1
																	MS4A8
																	DCUN1D3
																	LNX2
																	SYDE2
																	KIAA0040
																	ENC1
																	IL15RA
																	PDK4
																	RANBP9
																	AMPD3
																	ADAMTS15
																	RNF169
																	LARP4
																	ARRDC3
																	DUSP18
																	TIPARP
																	RGS2
																	LYVE1
																	RHOB
																	TP53INP1
																	ACSS1
																	USP54
																	SLC10A6
																	MAP3K6
																	SLC7A8
																	SESN1
																	FAM107A
																	MS4A6E
																	DUSP1
																	DDIT4
																	TSC22D3
																	HIF3A
																	ERRFI1
																	FKBP5
