# Supplementary material for: A cross-tissue transcriptomic approach decodes glucocorticoid receptor-dependent links to human metabolic phenotypes
Source: Research Square preprint supplement (doi:10.21203/rs.3.rs-6147414/v1), 2025-04-18
Supplement: Supplementary file 3 [file 6080eb1aa9155a135635641f.xlsx]

## Sheet: Literature
PTSD post-traumatic stress disorders, PNSS prenatal Sandy stress, FS force swimming
publication title	publication ID	tissue/cell type	species	treatment/stress model	dose	time
Molecular Adaptations to Social Defeat Stress and Induced Depression in Mice.	PMID:28500512	prefrontal-cortex	mouse	social-defeat-stress		240h and 720h
Research Resource: The Dexamethasone Transcriptome in Hypothalamic Embryonic Neural Stem Cells.	PMID:26606517	embryos_hypothalamic-region, NPSCs	mouse	dexamethasone	100nM	4h
Early transcriptomic response of mouse adrenal gland and Y-1 cells to dexamethasone.	PMID:35904237	adrenal-gland, Y-1	mouse	dexamethasone	100nM	1h
Global transcriptomic analysis of the arcuate nucleus following chronic glucocorticoid treatment.	PMID:31176677	ARC, glia	mouse	corticosterone	75μg/mL	48h and 672h
RNA-Seq transcriptome profiling identifies CRISPLD2 as a glucocorticoid responsive gene that modulates cytokine function in airway smooth muscle cells.	PMID:24926665	lung, ASM	human	dexamethasone	1μM	18h
Single-cell multi-omics of human preimplantation embryos shows susceptibility to glucocorticoids.	PMID:35948369	embryos, mural, polar, epi, pe	human	dexamethasone	0.1;1μg/mL	72h
Distinct regulation of hippocampal neuroplasticity and ciliary genes by corticosteroid receptors.	PMID:34362910	hippocampus	rat	force-swimming	NA	30 – 360h
Genomic determination of the glucocorticoid response reveals unexpected mechanisms of gene regulation.	PMID:19801529	lung, A549	human	dexamethasone	100nM	1h
Identifying the cellular targets of drug action in the central nervous system following corticosteroid therapy.	PMID:24147833	brain, mglia	rat	dexamethasone	1μM	48h
Identifying the cellular targets of drug action in the central nervous system following corticosteroid therapy.	PMID:24147833	brain, oligodendrocytes	rat	dexamethasone	1μM	48h
Identifying the cellular targets of drug action in the central nervous system following corticosteroid therapy.	PMID:24147833	brain, astrocytes	rat	dexamethasone	1μM	48h
Natural disaster stress during pregnancy is linked to reprogramming of the placenta transcriptome in relation to anxiety and stress hormones in young offspring.	PMID:33981007	placenta, CTB	human	PNSS	NA	NA
Glucocorticoid treatment of astrocytes results in temporally dynamic transcriptome regulation and astrocyte-enriched mRNA changes in vitro.	PMID:23110767	cortex, astrocytes	mouse	dexamethasone	100nM	1 – 24h
Hippocampal gene expression changes underlying stress sensitization and recovery.	PMID:24342991	hippocampus	mouse	corticosterone	15mg/kg	1h
Astrocytes are a neural target of morphine action via glucocorticoid receptor-dependent signaling.	PMID:23339081	striatum, astrocytes	mouse	dexamethasone	10nM	4h
Astrocytes are a neural target of morphine action via glucocorticoid receptor-dependent signaling.	PMID:23339081	striatum, neurones	mouse	dexamethasone	10nM	1h
Astrocytes are a neural target of morphine action via glucocorticoid receptor-dependent signaling.	PMID:23339081	striatum, neurones	mouse	dexamethasone	10nM	4h
Astrocytes are a neural target of morphine action via glucocorticoid receptor-dependent signaling.	PMID:23339081	striatum, astrocytes	mouse	dexamethasone	10nM	1h
The dynamic pattern of glucocorticoid receptor-mediated transcriptional responses in neuronal PC12 cells.	PMID:17026526	neuronal-pc12-cells	rat	corticosterone	100nM	1h
The dynamic pattern of glucocorticoid receptor-mediated transcriptional responses in neuronal PC12 cells.	PMID:17026526	neuronal-pc12-cells	rat	corticosterone	100nM	3h
Acute activation of hippocampal glucocorticoid receptors results in different waves of gene expression throughout time.	PMID:16503919	hippocampal-slices	rat	corticosterone	100nM	1h
Acute activation of hippocampal glucocorticoid receptors results in different waves of gene expression throughout time.	PMID:16503919	hippocampal-slices	rat	corticosterone	100nM	3h
Acute activation of hippocampal glucocorticoid receptors results in different waves of gene expression throughout time.	PMID:16503919	hippocampal-slices	rat	corticosterone	100nM	5h
Large-scale analysis of glucocorticoid target genes in rat hypothalamus.	PMID:18489715	hypothalamus	rat	dexamethasone	2mg/kg	2h
Previous history of chronic stress changes the transcriptional response to glucocorticoid challenge in the dentate gyrus region of the male rat hippocampus.	PMID:23633533	hippocampus, dentate-gyrus	rat	corticosterone	5mg/kg	3h
Previous history of chronic stress changes the transcriptional response to glucocorticoid challenge in the dentate gyrus region of the male rat hippocampus.	PMID:23633533	hippocampus, dentate-gyrus	rat	restraint stress x 6 h x 21d + corticosterone	5mg/kg	3h
Specific regulatory motifs predict glucocorticoid responsiveness of hippocampal gene expression.	PMID:21846803	hippocampus, dentate-gyrus	rat	corticoterone	5mg/kg	3h
Glucocorticoids modulate the mTOR pathway in the hippocampus: differential effects depending on stress history.	PMID:22778218	hippocampus, dentate-gyrus	rat	corticosterone	5mg/kg	3h
Identification of corticosteroid-responsive genes in rat hippocampus using serial analysis of gene expression.	PMID:11556892	hippocampus	rat	corticosterone	Low basal vs adx	72h
Identification of corticosteroid-responsive genes in rat hippocampus using serial analysis of gene expression.	PMID:11556892	hippocampus	rat	corticosterone	1mg/kg	3h
Detrimental effects of glucocorticoids on neuronal migration during brain development.	PMID:19564873	cortex, neuronal-precursor-cells	rat	NA	1uM	48h
Glucocorticoid-dependent hippocampal transcriptome in male rats: pathway-specific alterations with aging.	PMID:23736296	hippocampus, ca1	rat	corticosterone	Medium vs low basal level	3 moonths
Role for the kinase SGK1 in stress, depression, and glucocorticoid effects on hippocampal neurogenesis.	PMID:23650397	hippocampal-progenitor-cell-line	human	cortisol	100nM	12h
Role for the kinase SGK1 in stress, depression, and glucocorticoid effects on hippocampal neurogenesis.	PMID:23650397	hippocampal-progenitor-cell-line	human	cortisol	100µM	12h
Microarray analysis of cultured human brain aggregates following cortisol exposure: implications for cellular functions relevant to mood disorders.	PMID:16844382	cells-derived-from-human-fetal-brain-tissue	human	cortisol	500nM	3weeks
Integrative analysis of macrophage ribo-Seq and RNA-Seq data define glucocorticoid receptor regulated inflammatory response genes into distinct regulatory classes.	PMID:36284713	blood, THP-1	human	dexamethasone	1μM	3h
Genome-wide analysis of glucocorticoid receptor binding regions in adipocytes reveal gene network involved in triglyceride homeostasis.	PMID:21187916	adipocyte-tissue, 3T3-L1	mouse	dexamethasone	500nM	6h
Multiple effects of a short-term dexamethasone treatment in human skeletal muscle and adipose tissue.	PMID:22108209	adipose	human	dexamethasone	4mg/day	96h
Multiple effects of a short-term dexamethasone treatment in human skeletal muscle and adipose tissue.	PMID:22108209	skeletal-muscle	human	dexamethasone	4mg/day	96h
Effect of short-term oral prednisone therapy on blood gene expression: a randomised controlled clinical trial.	PMID:31382977	blood-COPD	human	prednisone	30mg/day	96h
Widespread regulation of gene expression by glucocorticoids in chondrocytes from patients with osteoarthritis as determined by RNA-Seq.	PMID:33203447	knee-cartilage, osteoarthritis-chon	human	dexamethasone	1µM	24h
Gene expression effects of glucocorticoid and mineralocorticoid receptor agonists and antagonists on normal human skeletal muscle.	PMID:28432191	skeletal-muscle, myotubes	human	prednisolone	1µM	48h
Gene expression effects of glucocorticoid and mineralocorticoid receptor agonists and antagonists on normal human skeletal muscle.	PMID:28432191	skeletal-muscle, myotubes	human	aldosterone	10µM	48h
Gene expression effects of glucocorticoid and mineralocorticoid receptor agonists and antagonists on normal human skeletal muscle.	PMID:28432191	skeletal-muscle, myotubes	human	eplerenone	10µM	48h
Gene expression effects of glucocorticoid and mineralocorticoid receptor agonists and antagonists on normal human skeletal muscle.	PMID:28432191	skeletal-muscle, myotubes	human	mifepristone	1µM	48h
Role of Non-Coding Regulatory Elements in the Control of GR-Dependent Gene Expression.	PMID:33923915	lung, A549	human	dexamethasone	100nM	0-12h
Impaired glucocorticoid receptor expression in liver disrupts feeding-induced gene expression, glucose uptake, and glycogen storage.	PMID:34731602	liver GRKO	mouse		NA	240-528h
Chronic exposure to glucocorticoids shapes gene expression and modulates innate and adaptive activation pathways in macrophages with distinct changes in leukocyte attraction.	PMID:24395918	blood, macrophages	human	fluticasone-propionate	100nM	168h
High-dose dexamethasone injection disordered metabolism and multiple protein kinases expression in the mouse kidney.	PMID:34735568	kidney	mouse	dexamethasone	10µg/g/day	168h
Transcriptional signatures of steroid hormones in the striatal neurons and astrocytes.	PMID:28381250	astrocyte	mouse	aldosterone	NA	NA
Transcriptional signatures of steroid hormones in the striatal neurons and astrocytes.	PMID:28381250	astrocyte	mouse	dexamethasone	NA	NA
Caveolin-1 regulates genomic action of the glucocorticoid receptor in neural stem cells.	PMID:24777604	embryos_hypothalamic-region, NPSCs-KO-Cav1	mouse	dexamethasone	100nM	4h
Caveolin-1 regulates genomic action of the glucocorticoid receptor in neural stem cells.	PMID:24777604	embryos_hypothalamic-region, NPSCs	mouse	dexamethasone	100nM	4h
Microarray analyses of glucocorticoid and vitamin D3 target genes in differentiating cultured human podocytes.	PMID:23593176	kidney, HPCs-differentiated	human	dexamethasone	100nM	72h

## Sheet: Gene_lists
publication ID	GR-dependent list	GR-dependent transcriptional pattern	chi-square value	p-value	fdr	number of overlapping genes	overlapping genes
PMID:28381250	astrocyte_down	cluster L	11.2025615049982	0.00081684496889267	0.0074332892169233	4	KCNK5;NRN1;PLK3;TMEM100
PMID:28381250	astrocyte_down	cluster O	17.819869391069	2.42834141122496E-05	0.000266954579301107	4	ENC1;GRAMD1B;SLC16A9;TLE1
PMID:28381250	astrocyte_down	DOWN	401.838075276173	2.19185104302323E-89	2.39350133898136E-87	20	AK4;ASB2;CCL4;CD83;CLEC7A;CXCL10;DBP;DDIT4L;DUSP4;IL1B;LBH;LHFPL2;LMCD1;LMO2;PLAU;PLEKHO2;RASL11B;S1PR2;SPATA13;SSTR2
PMID:28381250	astrocyte_down	UP	14.3929717244619	0.000148354990235261	0.00149083112886723	9	ENC1;GRAMD1B;KCNK5;NRN1;PLK3;SLC16A9;SOX4;TLE1;TMEM100
PMID:28381250	astrocyte_down	cluster D	332.350315720075	2.957269302784E-74	2.84941595174129E-72	12	ASB2;CCL4;CD83;CLEC7A;CXCL10;DBP;DUSP4;IL1B;LBH;LMO2;PLEKHO2;S1PR2
PMID:28381250	astrocyte_down	cluster F	188.512788830051	6.71372676189346E-43	4.0729942355487E-41	5	AK4;DDIT4L;LHFPL2;LMCD1;SSTR2
PMID:28381250	astrocyte_up	cluster K	576.457230621179	2.21161340815556E-127	6.03770460426468E-125	14	BCL2L1;CEBPB;CHST15;CSRNP1;KCNK1;LIMS2;LPIN1;PER1;SLA;SLC45A3;SPSB1;TOB2;TXNIP;ZFP36
PMID:28381250	astrocyte_up	cluster M	71.0323241988955	3.51419912654188E-17	8.99415338949313E-16	4	PLEKHF1;PMAIP1;PPP1R3G;RHOU
PMID:28381250	astrocyte_up	cluster O	435.350434103483	1.11271270820869E-96	1.40201801234295E-94	18	ADRB2;ARL4D;CDKN1A;DCUN1D3;GADD45G;GOT1L1;KLRG2;LCN2;LRRC8A;MTHFD2;NAPEPLD;PDK4;RANBP9;RNF169;SLC25A33;SPHK1;STIM1;ZBTB16
PMID:28381250	astrocyte_up	cluster P	413.519206248359	6.28193641412375E-92	7.34986560452478E-90	11	ARRDC3;DDIT4;ERRFI1;FAM107A;FKBP5;LYVE1;MAP3K6;MS4A6A;SESN1;SLC10A6;TSC22D3
PMID:28381250	astrocyte_up	UP	1019.97361642508	8.18020506705819E-224	6.69958794992065E-221	61	ADRB2;ARL4D;ARRDC3;BCL2L1;CDKN1A;CEBPB;CHST15;CSRNP1;DCUN1D3;DDIT4;ERRFI1;FAM107A;FGFBP1;FKBP5;GADD45G;GOT1L1;KCNK1;KLF15;KLRG2;LCN2;LIMS2;LPIN1;LRG1;LRRC8A;LYVE1;MAP3K6;MFSD2A;MS4A6A;MTHFD2;NAPEPLD;NT5E;PDK4;PER1;PEX11A;PIM3;PLEKHF1;PLIN4;PMAIP1;PPP1R3G;PTPN22;RANBP9;RASGRF1;RHOU;RNF169;SESN1;SGK1;SLA;SLC10A6;SLC25A33;SLC45A3;SMOX;SPHK1;SPSB1;STIM1;TFCP2L1;TNS1;TOB2;TSC22D3;TXNIP;ZBTB16;ZFP36
PMID:28381250	astrocyte_up	cluster I	116.715294804593	3.31380908018883E-27	1.18000418985854E-25	7	KLF15;LRG1;PIM3;PLIN4;SGK1;SMOX;TNS1
PMID:18489715	hypothalamus_up	UP	203.006245840403	4.61132351851368E-46	2.90513381666362E-44	5	DDIT4;ERRFI1;GADD45G;PDK4;PLEKHF1
PMID:19801529	lung_A549_down	DOWN	101.472308987422	7.24694692301892E-24	2.28278828075096E-22	7	CYP24A1;EFNA1;NRARP;OSGIN1;PDE4B;PLAU;SOCS3
PMID:19801529	lung_A549_down	UP	11.0347740622018	0.000894185733537092	0.00809213387587711	5	ARRDC3;CPEB2;ENC1;GDF15;SOX4
PMID:19801529	lung_A549_down	cluster D	34.3047942007177	4.71219537090436E-09	7.01688728867395E-08	3	EFNA1;NRARP;PDE4B
PMID:19801529	lung_A549_up	cluster K	40.4081748715604	2.06077043967515E-10	3.37554198018789E-09	3	CEBPB;PER1;ZFP36
PMID:19801529	lung_A549_up	cluster O	59.2828141977039	1.36564000310835E-14	3.1068310070715E-13	5	ARL4A;ARL4D;LRRC8A;PDK4;PPP1R3B
PMID:19801529	lung_A549_up	cluster P	470.303637440551	2.75229535168528E-104	4.50825978606049E-102	8	DDIT4;DUSP1;ERRFI1;FKBP5;RGS2;RHOB;TIPARP;TSC22D3
PMID:19801529	lung_A549_up	UP	273.033979841201	2.47559722217653E-61	1.84319465905689E-59	22	ANGPTL4;ARL4A;ARL4D;CEBPB;DDIT4;DUSP1;ERRFI1;FKBP5;IGFBP1;LRRC8A;PDK4;PER1;PIM3;PPP1R3B;RGS2;RHOB;RHOU;RIPK4;TFCP2L1;TIPARP;TSC22D3;ZFP36
PMID:21187916	adipocyte-tissue_3T3-L1_down	DOWN	139.229171705537	3.92445441532397E-32	1.78562675897241E-30	11	ADRB3;CCL7;DUSP4;FFAR2;IFIT3;LHFPL2;MARCKS;RASL12;SLC40A1;SUCNR1;ZNF467
PMID:21187916	adipocyte-tissue_3T3-L1_down	cluster C	134.169390149147	5.01674172172051E-31	2.16247972109953E-29	5	ADRB3;FFAR2;RASL12;SLC40A1;ZNF467
PMID:21187916	adipocyte-tissue_3T3-L1_up	cluster J	18.6027170936886	1.60990930270023E-05	0.00018186423709124	3	CAB39L;INSL6;PPP1R3C
PMID:21187916	adipocyte-tissue_3T3-L1_up	cluster K	178.002104208447	1.32329053620462E-40	7.47430999414886E-39	9	LIMS2;LPIN1;PER1;SLC45A3;SPSB1;TOB2;TXNIP;USP2;ZFP36
PMID:21187916	adipocyte-tissue_3T3-L1_up	cluster M	27.5221889207772	1.5530251202574E-07	2.0514960862755E-06	3	MT1M;PLEKHF1;RHOU
PMID:21187916	adipocyte-tissue_3T3-L1_up	cluster O	958.721830171358	1.68593828718365E-210	9.20522304802271E-208	29	ADAMTS15;ADRB2;AFF1;AMPD3;CDKN1A;CPEB2;DCUN1D3;FGFR2;GADD45G;GDPD1;HSPA2;KIAA0040;LCN2;LIMK2;MRAP;MTHFD2;NET1;NFIL3;PDK4;RANBP9;RPRML;SDC4;SLC25A33;SNTA1;SPHK1;STIM1;TES;TLE1;ZBTB16
PMID:21187916	adipocyte-tissue_3T3-L1_up	cluster P	645.909122410717	1.73300861274325E-142	5.67733621534688E-140	15	ARRDC3;DDIT4;DUSP1;DUSP18;ERRFI1;FKBP5;HIF3A;MAP3K6;RGS2;RHOB;SESN1;SLC10A6;TP53INP1;TSC22D3;USP54
PMID:21187916	adipocyte-tissue_3T3-L1_up	UP	1054.47623806935	2.59062785450383E-231	4.24344842567727E-228	69	ADAMTS15;ADRB2;AFF1;ALAS1;AMPD3;ANGPTL4;ANGPTL7;ARRDC3;CAB39L;CDKN1A;CPEB2;DCUN1D3;DDIT4;DUSP1;DUSP14;DUSP18;ERRFI1;FGFR2;FKBP5;GADD45G;GDPD1;HIF3A;HP;HSPA2;INSIG2;INSL6;KIAA0040;LCN2;LIMK2;LIMS2;LPIN1;MAP3K6;MRAP;MRAS;MT1M;MTHFD2;NET1;NFIL3;NPM3;PDK4;PER1;PLEKHF1;PPP1R3C;RANBP9;RGS2;RHOB;RHOU;RPRML;SDC4;SESN1;SGK1;SLC10A6;SLC25A33;SLC45A3;SNTA1;SNX10;SPHK1;SPSB1;STIM1;TES;TLE1;TOB2;TP53INP1;TSC2…
PMID:21187916	adipocyte-tissue_3T3-L1_up	cluster I	41.848514685092	9.862566412774E-11	1.68280039417956E-09	5	ALAS1;ANGPTL4;NPM3;SGK1;SNX10
PMID:21846803	hippocampus_dentate-gyrus_up	cluster P	53.2876881236745	2.8810659603552E-13	6.05023851674592E-12	3	DDIT4;ERRFI1;FKBP5
PMID:21846803	hippocampus_dentate-gyrus_up	UP	12.4775417198234	0.000411873854919037	0.00385513928204219	6	DDIT4;ERRFI1;FAM110B;FKBP5;GADD45B;NT5E
PMID:22108209	adipose_up	cluster O	34.793529671291	3.66589775225127E-09	5.61190702634354E-08	4	AMPD3;CDKN1A;MTHFD2;NFIL3
PMID:22108209	adipose_up	UP	44.2793497158541	2.84703709412743E-11	5.23982782042778E-10	10	AMPD3;ANKRD2;CDKN1A;CPAMD8;DDIT4;HP;MTHFD2;NFIL3;TSC22D1;USP54
PMID:22108209	skeletal-muscle_up	cluster K	10.9433852176009	0.000939383800921647	0.00845445420829483	4	ADAMTS9;LPIN1;SLA;ZFP36
PMID:22108209	skeletal-muscle_up	UP	18.297847283626	1.88920533848823E-05	0.000210511452002974	20	ADAMTS9;AQP9;ARG1;ASGR1;FKBP5;FOS;LPIN1;LRG1;NET1;NFIL3;ORM2;PCK1;RAP1GAP;RGS2;SAA4;SERPINA1;SLA;SNTA1;TMEM100;ZFP36
PMID:23110767	cortex_astrocytes_down	DOWN	58.2832897522038	2.26963737340304E-14	5.09269317484133E-13	36	ASB2;BAHCC1;CCL4;CCL7;CD52;CHAC1;CLEC7A;CXCL10;CYP24A1;CYTH4;DBP;DDIT4L;DUSP4;ESM1;IFIT3;IGSF9;IRF1;KIAA1217;LBH;LHFPL2;LMCD1;LMO2;MARCKS;NRARP;PDE4B;PLAU;RNF144A;SIRPB1;SLC40A1;SOCS3;SOX11;SOX7;SPATA13;SSTR2;SUCNR1;ZNF467
PMID:23110767	cortex_astrocytes_down	cluster D	36.9237760532946	1.22838804822605E-09	1.99217784454878E-08	18	ASB2;CCL4;CD52;CLEC7A;CXCL10;CYTH4;DBP;DUSP4;ESM1;IFIT3;IRF1;LBH;LMO2;NRARP;PDE4B;RNF144A;SIRPB1;SOX7
PMID:23110767	cortex_astrocytes_down	cluster F	14.5637266216993	0.000135497916415998	0.00137003448820621	6	DDIT4L;IGSF9;LHFPL2;LMCD1;MARCKS;SSTR2
PMID:23110767	cortex_astrocytes_up	cluster J	10.6620580516406	0.001093556475391	0.00973502992766554	6	CAB39L;CCNG1;INSL6;KNG1;NT5E;PPFIBP1
PMID:23110767	cortex_astrocytes_up	cluster K	102.300366196614	4.77103910015501E-24	1.53234549922625E-22	17	ADAMTS9;BCL2L1;BMP4;CEBPB;KCNK1;LIMS2;LPIN1;PER1;RAPGEF4;SLA;SLC45A3;SPSB1;TOB2;TSC22D1;TXNIP;USP2;ZFP36
PMID:23110767	cortex_astrocytes_up	cluster M	18.2515584485436	1.9356751262991E-05	0.000214232152491752	6	FARP2;GLDC;PLEKHF1;PMAIP1;RAP1GAP;RHOU
PMID:23110767	cortex_astrocytes_up	cluster O	90.4896970611037	1.85942620811464E-21	5.34340373489786E-20	25	ADRB2;AFF1;AMPD3;CDKN1A;DCUN1D3;GADD45G;GOT1L1;KLRG2;LARP4;LCN2;LIMK2;LNX2;LRRC8A;MAFF;MTHFD2;NAPEPLD;NFIL3;PDK4;RANBP9;SDC4;SLC25A33;SNTA1;SPHK1;STIM1;ZBTB16
PMID:23110767	cortex_astrocytes_up	cluster P	80.8435987407729	2.44307943597856E-19	6.89959330367739E-18	14	ARRDC3;DDIT4;DUSP1;ERRFI1;FAM107A;FKBP5;MAP3K6;MS4A6A;RHOB;SESN1;SLC10A6;SLC7A8;TP53INP1;TSC22D3
PMID:23110767	cortex_astrocytes_up	UP	256.815426987739	8.48580760642619E-58	5.55990114373044E-56	98	ACOT11;ADAMTS9;ADRB2;AFF1;AMPD3;ANGPTL4;ANGPTL7;APOC1;AQP9;ARRDC3;BCL2L1;BMP4;CAB39L;CCNG1;CDKN1A;CEBPB;DCUN1D3;DDIT4;DUSP1;ERRFI1;FAM107A;FARP2;FGFBP1;FKBP5;GADD45G;GLDC;GOT1L1;GPR83;GREB1;HSD3B1;HSPB8;INSIG2;INSL6;ITIH3;KCNF1;KCNK1;KLF15;KLHL6;KLRG2;KNG1;LARP4;LCN2;LIMK2;LIMS2;LNX2;LPIN1;LRG1;LRRC8A;MAFF;MAP3K6;MS4A6A;MTHFD2;NAPEPLD;NFIL3;NT5E;PDCD4;PDK4;PER1;PEX11A;PIK3IP1;PIM3;PKIG;PLEKHF1;PM…
PMID:23110767	cortex_astrocytes_up	cluster I	23.528221459604	1.23094883449044E-06	1.51601066984613E-05	10	ANGPTL4;APOC1;HSPB8;KLF15;LRG1;PIM3;SGK1;SMOX;TMCC3;TNS1
PMID:23339081	striatum_astrocytes_up	cluster K	56.715883731208	5.03551669257222E-14	1.09975684565777E-12	8	BCL2L1;LIMS2;LPIN1;PER1;SPSB1;TOB2;USP2;ZFP36
PMID:23339081	striatum_astrocytes_up	cluster O	26.723793061485	2.34713505164418E-07	3.05127556713744E-06	9	AFF1;CDKN1A;DCUN1D3;IL15RA;NAPEPLD;PDK4;RANBP9;SLC25A33;STIM1
PMID:23339081	striatum_astrocytes_up	cluster P	51.085109827855	8.8446673496862E-13	1.74548977334771E-11	7	DDIT4;ERRFI1;FAM107A;HIF3A;RHOB;SESN1;TSC22D3
PMID:23339081	striatum_astrocytes_up	UP	112.783584065307	2.40660139322521E-26	8.21252725438103E-25	40	ACOT11;AFF1;BCL2L1;CCNG1;CDKN1A;CPAMD8;CYP1A2;DCUN1D3;DDIT4;ERRFI1;FAM107A;HIF3A;HSD3B1;IL15RA;KLF15;KLHL6;KNG1;LIMS2;LPIN1;LRTM1;MDM1;NAPEPLD;PDK4;PER1;PEX11A;PIM3;PLEKHF1;RANBP9;RHOB;RHOU;SERPINA1;SESN1;SGK1;SLC25A33;SPSB1;STIM1;TOB2;TSC22D3;USP2;ZFP36
PMID:23339081	striatum_neurones_down	cluster L	31.1618755886859	2.37382663824029E-08	3.38115481168487E-07	10	ACOT11;ANGPTL7;APOH;AQP9;ARG1;BHMT;KLHL6;ORM2;PRKAG3;SERPINF1
PMID:23339081	striatum_neurones_down	UP	24.4046710596048	7.80791497158757E-07	9.83797286420033E-06	20	ACOT11;ANGPTL7;APOH;AQP9;ARG1;BHMT;CKLF;GDF15;IGFBP1;IL15RA;KLHL6;MAP3K6;MRAP;ORM2;PIK3IP1;PNMT;PPFIBP1;PRKAG3;SERPINF1;SLA
PMID:23593176	kidney_HPCs-differentiated_up	cluster K	65.6832625845607	5.2953671279793E-16	1.27556049347501E-14	6	BCL2L1;BMP4;CEBPB;LPIN1;TXNIP;VCAM1
PMID:23593176	kidney_HPCs-differentiated_up	cluster P	80.1665247515403	3.4414846883442E-19	9.55449477882679E-18	6	DDIT4;DUSP1;FKBP5;RGS2;TP53INP1;TSC22D3
PMID:23593176	kidney_HPCs-differentiated_up	UP	96.7765788192774	7.76087461889983E-23	2.35413196773295E-21	25	ANGPTL4;BCL2L1;BMP4;CDKN1A;CEBPB;DDIT4;DUSP1;FKBP5;GDF15;HSPB8;LCN2;LPIN1;NT5E;PLOD2;PMAIP1;PPP1R3C;RGS2;SAA4;SERPINE2;TP53INP1;TRNP1;TSC22D3;TXNIP;VCAM1;ZNFX1
PMID:23633533	hippocampus_dentate-gyrus_up	cluster P	20.6665056803468	5.46639096395104E-06	6.39567742782271E-05	3	ERRFI1;FKBP5;TIPARP
PMID:23633533	hippocampus_dentate-gyrus_up	UP	22.2994294776061	2.33275904526273E-06	2.85153680308981E-05	12	CDKN1A;CSRNP1;ERRFI1;FAM110B;FKBP5;GADD45B;GPR83;NT5E;PDK4;SMOX;TIPARP;TMCC3
PMID:23736296	hippocampus_ca1_down	cluster L	18.6600895235775	1.56218393087992E-05	0.000177698422137591	5	C4BPA;CYP2A13;CYP3A43;F10;PON1
PMID:23736296	hippocampus_ca1_down	DOWN	78.8628548946886	6.65748265557133E-19	1.78769780161079E-17	10	ACOT2;ADRB3;CCR5;CXCL10;DBP;IRF1;KCNJ8;MARCKS;SLC40A1;SSTR2
PMID:23736296	hippocampus_ca1_down	cluster C	27.9585764249881	1.23940409207745E-07	1.677804878366E-06	3	ADRB3;KCNJ8;SLC40A1
PMID:23736296	hippocampus_ca1_down	cluster D	23.9126345558828	1.00807982230372E-06	1.2604845411706E-05	4	CCR5;CXCL10;DBP;IRF1
PMID:23736296	hippocampus_ca1_up	UP	31.1431351668497	2.39685505298657E-08	3.38452463516551E-07	10	ABCC8;ARG2;ERRFI1;FOS;HSPA2;ITIH3;KCNK1;RDH16;SERPINA10;SGK1
PMID:24147833	brain_astrocytes_up	cluster P	300.102085939846	3.12989879479753E-67	2.6983022241465E-65	3	DDIT4;FKBP5;TSC22D3
PMID:24147833	brain_astrocytes_up	UP	19.3175075956269	1.10686776594343E-05	0.000127679535254601	3	DDIT4;FKBP5;TSC22D3
PMID:24342991	hippocampus_down	DOWN	41.8666648832866	9.77143968862803E-11	1.68280039417956E-09	11	ACOT2;BAHCC1;CCR5;EGFL7;ELOVL1;ESM1;IFIT3;IL1B;LMCD1;PLEKHO2;RASL12
PMID:24342991	hippocampus_down	cluster C	12.280132028323	0.000457805982094608	0.00426071703790322	3	BAHCC1;EGFL7;RASL12
PMID:24342991	hippocampus_down	cluster D	17.8028247686955	2.45019212683121E-05	0.000267560980249969	5	CCR5;ESM1;IFIT3;IL1B;PLEKHO2
PMID:24342991	hippocampus_up	cluster O	13.1616413738529	0.000285738481392411	0.0027531743089457	6	APBB3;GADD45G;NAPEPLD;NET1;PDK4;SLC25A33
PMID:24342991	hippocampus_up	cluster P	69.9733952878963	6.01097365807207E-17	1.51476536183416E-15	7	DDIT4;ERRFI1;LYVE1;MAP3K6;SESN1;TIPARP;TP53INP1
PMID:24342991	hippocampus_up	UP	43.6666116573697	3.89358103597277E-11	7.00844586475098E-10	24	APBB3;DDIT4;ERRFI1;GADD45G;KLF15;LYVE1;MAP3K6;MRAS;NAPEPLD;NET1;PDK4;PEX11A;PLEKHF1;POLR3E;RHOU;SESN1;SLC25A33;SLC45A3;SNX10;TIPARP;TMC7;TOB2;TP53INP1;ZCCHC18
PMID:24342991	hippocampus_up	cluster G	13.5891600471546	0.000227495400214095	0.00225840888212538	3	MRAS;PEX11A;ZCCHC18
PMID:24395918	blood_macrophages_up	cluster L	16.4613060767962	4.96531758624896E-05	0.000521358346556141	3	CES1;GADD45B;SERPINF1
PMID:24395918	blood_macrophages_up	cluster P	141.043720787624	1.57391753069276E-32	7.36593404364211E-31	4	DDIT4;FKBP5;SESN1;TSC22D3
PMID:24395918	blood_macrophages_up	UP	104.014410670107	2.00849879227537E-24	6.57984204349412E-23	12	ANGPTL4;CES1;DDIT4;FKBP5;GADD45B;PDK4;SDC4;SERPINF1;SESN1;SLA;TFCP2L1;TSC22D3
PMID:24777604	embryos_hypothalamic-region_NPSCs_up	cluster K	293.545275456933	8.39631584524285E-66	6.54912635928942E-64	8	BCL2L1;LPIN1;PER1;PLEKHH1;SPSB1;TOB2;TSC22D1;USP2
PMID:24777604	embryos_hypothalamic-region_NPSCs_up	cluster M	60.932011699943	5.90803057883315E-15	1.38247915544696E-13	3	MT1M;PLEKHF1;RHOU
PMID:24777604	embryos_hypothalamic-region_NPSCs_up	cluster O	166.945962877305	3.4374256864014E-38	1.81629137881468E-36	9	ADRB2;AFF1;AMPD3;ARL4D;CDKN1A;LRRC8A;PDK4;SPHK1;ZBTB16
PMID:24777604	embryos_hypothalamic-region_NPSCs_up	cluster P	454.626917265671	7.09874641569631E-101	9.68978885742546E-99	9	ERRFI1;FKBP5;HIF3A;MAP3K6;RGS2;RHOB;SESN1;SLC10A6;TSC22D3
PMID:24777604	embryos_hypothalamic-region_NPSCs_up	UP	512.859750737079	1.51362455522481E-113	2.75479669050915E-111	34	ADRB2;AFF1;AMPD3;ARL4D;BCL2L1;CDKN1A;ERRFI1;FKBP5;HIF3A;LPIN1;LRRC8A;MAP3K6;MT1M;PDK4;PER1;PIM3;PLEKHF1;PLEKHH1;PLIN4;PLIN5;RGS2;RHOB;RHOU;SESN1;SLC10A6;SMOX;SPHK1;SPSB1;THRSP;TOB2;TSC22D1;TSC22D3;USP2;ZBTB16
PMID:24777604	embryos_hypothalamic-region_NPSCs_up	cluster I	26.8972913376634	2.14559375034663E-07	2.81158605045423E-06	3	PIM3;PLIN4;SMOX
PMID:24777604	embryos_hypothalamic-region_NPSCs-KO-Cav1_up	cluster K	269.876689157104	1.2072142010962E-60	8.59746461476335E-59	7	BCL2L1;CEBPB;LPIN1;PER1;PLEKHH1;TOB2;USP2
PMID:24777604	embryos_hypothalamic-region_NPSCs-KO-Cav1_up	cluster M	75.4519216346425	3.74413666263448E-18	9.89176750547626E-17	3	MT1M;PLEKHF1;RHOU
PMID:24777604	embryos_hypothalamic-region_NPSCs-KO-Cav1_up	cluster O	54.0981592722105	1.90719846328578E-13	4.0571312764443E-12	5	ARL4D;LRRC8A;PDK4;SLC25A33;ZBTB16
PMID:24777604	embryos_hypothalamic-region_NPSCs-KO-Cav1_up	cluster P	558.649241547818	1.65369358050096E-123	3.86964297837224E-121	9	ERRFI1;FKBP5;HIF3A;MAP3K6;RGS2;RHOB;SESN1;SLC10A6;TSC22D3
PMID:24777604	embryos_hypothalamic-region_NPSCs-KO-Cav1_up	UP	525.512601123643	2.6743272489502E-116	5.47568504222553E-114	31	ARL4D;BCL2L1;CEBPB;ERRFI1;FKBP5;GREB1;HIF3A;KLF15;LPIN1;LRRC8A;MAP3K6;MT1M;PDK4;PER1;PIM3;PLEKHF1;PLEKHH1;PLK3;RGS2;RHOB;RHOU;SESN1;SLC10A6;SLC25A33;SMOX;THRSP;TNS1;TOB2;TSC22D3;USP2;ZBTB16
PMID:24777604	embryos_hypothalamic-region_NPSCs-KO-Cav1_up	cluster I	69.0464639248824	9.61708102329337E-17	2.38678465396281E-15	4	KLF15;PIM3;SMOX;TNS1
PMID:24926665	lung_ASM_down	cluster O	28.5511977053719	9.12533644442118E-08	1.24560842466349E-06	5	HSPA2;MAFF;NFIL3;PDK4;ZBTB16
PMID:24926665	lung_ASM_down	cluster P	185.825749532378	2.59138438911586E-42	1.51595986763278E-40	7	ACSS1;DUSP1;ERRFI1;FAM107A;FKBP5;RHOB;TSC22D3
PMID:24926665	lung_ASM_down	DOWN	32.8166623661689	1.01273042512186E-08	1.48111824674072E-07	7	DAPK2;LBH;LMCD1;NUAK1;RASD1;RASL11B;SAP30
PMID:24926665	lung_ASM_down	UP	60.4349530067576	7.60504905822546E-15	1.75451695174272E-13	16	ACSS1;DUSP1;ERRFI1;FAM107A;FKBP5;GADD45B;HSPA2;KLF15;MAFF;NFIL3;PDK4;PER1;RHOB;TRNP1;TSC22D3;ZBTB16
PMID:24926665	lung_ASM_down	cluster C	27.6335768640124	1.46611566508585E-07	1.95243695887043E-06	3	NUAK1;RASD1;RASL11B
PMID:26606517	embryos_hypothalamic-region_NPSCs_up	cluster K	133.91636089908	5.69862855466187E-31	2.39342399295798E-29	5	ADAMTS9;BCL2L1;LPIN1;PER1;TOB2
PMID:26606517	embryos_hypothalamic-region_NPSCs_up	cluster M	79.769421438719	4.20754351121024E-19	1.1486593785604E-17	3	MT1M;PLEKHF1;RHOU
PMID:26606517	embryos_hypothalamic-region_NPSCs_up	cluster O	57.4607924280969	3.4478412515307E-14	7.63184320271256E-13	5	ADRB2;ARL4D;PDK4;SDC4;ZBTB16
PMID:26606517	embryos_hypothalamic-region_NPSCs_up	cluster P	457.262024726081	1.8955087724649E-101	2.82258488117956E-99	8	DDIT4;ERRFI1;FAM107A;FKBP5;HIF3A;RHOB;SESN1;TSC22D3
PMID:26606517	embryos_hypothalamic-region_NPSCs_up	UP	381.245972647614	6.66337990394488E-85	6.82163517666357E-83	26	ADAMTS9;ADRB2;ARL4D;BCL2L1;DDIT4;ERRFI1;FAM107A;FKBP5;HIF3A;KLF15;LPIN1;MFSD2A;MT1M;PDK4;PER1;PIM3;PLEKHF1;RHOB;RHOU;SDC4;SESN1;SMOX;THRSP;TOB2;TSC22D3;ZBTB16
PMID:26606517	embryos_hypothalamic-region_NPSCs_up	cluster I	35.9433826367624	2.0313509201522E-09	3.19937769923971E-08	3	KLF15;PIM3;SMOX
PMID:28432191	skeletal-muscle_myotubes_down	cluster J	24.6215981070408	6.97654162966075E-07	8.92779311670649E-06	3	NT5E;PPFIBP1;PPP1R3C
PMID:28432191	skeletal-muscle_myotubes_down	UP	12.6429787876403	0.000376978823894294	0.00359006577638868	10	DUSP14;GDF15;MTHFD2;NT5E;PPFIBP1;PPP1R3C;SDC4;SERPINE2;UAP1;VCAM1
PMID:28432191	skeletal-muscle_myotubes_down	cluster H	30.4744249711262	3.38297044850375E-08	4.69602169038063E-07	3	DUSP14;GDF15;SERPINE2
PMID:28432191	skeletal-muscle_myotubes_up	cluster O	20.0801113830576	7.42649670529358E-06	8.62737702359637E-05	5	FOS;NFIL3;PDK4;RGCC;ZBTB16
PMID:28432191	skeletal-muscle_myotubes_up	cluster P	64.2972967080413	1.06992440001173E-15	2.5399074887235E-14	5	DUSP1;FAM107A;FKBP5;HIF3A;RGS2
PMID:28432191	skeletal-muscle_myotubes_up	UP	40.4597500039245	2.00708376162984E-10	3.32081131469664E-09	16	ANGPTL4;ATP1B1;DUSP1;FAM107A;FKBP5;FOS;GADD45B;HIF3A;MT1M;NFIL3;PDK4;RGCC;RGS2;TXNIP;ZBTB16;ZFP36
PMID:28500512	prefrontal-cortex_down	cluster M	34.5461989373288	4.16253587916562E-09	6.25526033951677E-08	3	MCF2L;NHSL2;PLEKHF1
PMID:28500512	prefrontal-cortex_down	cluster P	41.0527157350642	1.48178131972081E-10	2.50222453783782E-09	4	FKBP5;MAP3K6;TSC22D3;USP54
PMID:28500512	prefrontal-cortex_down	UP	32.0244410873905	1.52245008814295E-08	2.20687897732579E-07	14	AFF1;BMP4;DUSP14;FKBP5;HP;MAP3K6;MCF2L;NHSL2;PLEKHF1;TNS1;TSC22D3;TSKU;TXNIP;USP54
PMID:28500512	prefrontal-cortex_up	cluster P	46.1091289549027	1.11846081712454E-11	2.10579174534482E-10	5	DDIT4;FKBP5;LYVE1;MAP3K6;TSC22D3
PMID:28500512	prefrontal-cortex_up	UP	52.7351466891822	3.81699080406329E-13	7.91421637601984E-12	21	BMP4;DDIT4;FGFBP1;FKBP5;HSPB8;KCNK5;LYVE1;MAP3K6;MRAP;NET1;PIM3;PLEKHF1;SERPINF1;SGK1;SLC16A9;TNS1;TSC22D3;TSKU;TXNIP;USP2;VTN
PMID:28500512	prefrontal-cortex_up	cluster I	34.0291761425735	5.4291842866632E-09	8.01171519058948E-08	5	HSPB8;PIM3;SGK1;TNS1;TSKU
PMID:33203447	knee-cartilage_osteoarthritis-chon_down	DOWN	45.3400105894181	1.65630647389061E-11	3.08298864117366E-10	15	BAHCC1;BHLHE40;CHAC1;DBP;ESM1;FGF7;INHBE;LMO2;MMP13;MRGPRF;PLAU;RASL12;SSTR2;TMIE;TRIL
PMID:33203447	knee-cartilage_osteoarthritis-chon_down	cluster D	21.5782138771889	3.3968855224514E-06	4.12155443390769E-05	7	BHLHE40;DBP;ESM1;FGF7;LMO2;MMP13;MRGPRF
PMID:33203447	knee-cartilage_osteoarthritis-chon_down	cluster F	13.2980715926808	0.000265679234933577	0.00259037254060238	3	SSTR2;TMIE;TRIL
PMID:33203447	knee-cartilage_osteoarthritis-chon_up	cluster K	30.9867246091673	2.5979935788344E-08	3.63719101036816E-07	5	ADAMTS9;PER1;SPSB1;TXNIP;ZFP36
PMID:33203447	knee-cartilage_osteoarthritis-chon_up	cluster O	36.8674758181003	1.26437661958865E-09	2.03044010086884E-08	8	ARL4D;FOS;LNX2;NET1;PDK4;RGCC;SYBU;ZBTB16
PMID:33203447	knee-cartilage_osteoarthritis-chon_up	cluster P	151.473541614663	8.25826376567552E-35	4.09910183278076E-33	9	DDIT4;DUSP1;FKBP5;LYVE1;RHOB;SESN1;SLC7A8;TIPARP;TSC22D3
PMID:33203447	knee-cartilage_osteoarthritis-chon_up	UP	133.188271642993	8.22317725809949E-31	3.36739108719174E-29	33	ABCC8;ADAMTS9;ANGPTL4;ANGPTL7;AQP9;ARL4D;DDIT4;DUSP1;FKBP5;FOS;GADD45B;KLF15;LNX2;LYVE1;MT1M;NET1;PDK4;PER1;PIM3;RGCC;RHOB;SESN1;SLC7A8;SPSB1;SYBU;TFCP2L1;TIPARP;TMEM100;TSC22D3;TXNIP;UAP1;ZBTB16;ZFP36
PMID:33923915	lung_A549_up	cluster O	12.8424522172063	0.000338843259635163	0.00324576175018945	5	AFF1;SDC4;STIM1;ZBTB16;ZNFX1
PMID:33923915	lung_A549_up	UP	23.6910844436084	1.13105298368032E-06	1.40353392974876E-05	16	AFF1;ANKRD2;CPS1;FKBP5;GLDC;PEX11A;PPP1R3C;SDC4;SLC7A8;STIM1;SUSD3;TOM1L2;TRNP1;USP2;ZBTB16;ZNFX1
PMID:34362910	hippocampus_down	cluster D	15.1702547296552	9.82387969459364E-05	0.00100571968373402	7	EFNA1;PDE4B;PLEKHO2;RASGRP1;RASGRP3;SEMA6A;TNFSF10
PMID:34362910	hippocampus_up	cluster K	13.521108861337	0.000235894992069013	0.00231504796980633	5	CSRNP1;PER1;SPSB1;TOB2;ZFP36
PMID:34362910	hippocampus_up	cluster O	54.4114954285847	1.62608852494433E-13	3.50464868928792E-12	13	AFF1;CDKN1A;IL15RA;IRAK2;LRRC8A;MAFF;NET1;NFIL3;PDK4;RNF169;SNTA1;SYBU;ZBTB16
PMID:34362910	hippocampus_up	cluster P	120.831618109278	4.15982017133738E-28	1.51417454236681E-26	11	ARRDC3;DDIT4;ERRFI1;FAM107A;FKBP5;HIF3A;MAP3K6;SLC10A6;TIPARP;TSC22D3;USP54
PMID:34362910	hippocampus_up	UP	92.3914771977604	7.11197193915745E-22	2.08025179220356E-20	41	ABCC8;AFF1;ANGPTL4;ARRDC3;CDKN1A;CES1;CSRNP1;DDIT4;ERRFI1;FAM107A;FKBP5;HIF3A;IL15RA;IRAK2;KLF15;LRRC8A;MAFF;MAP3K6;MFSD2A;MT1M;NET1;NFIL3;NT5E;PDK4;PER1;PEX11A;RNF169;SERPINA10;SLC10A6;SMOX;SNTA1;SPSB1;SYBU;TIPARP;TNS1;TOB2;TSC22D3;UAP1;USP54;ZBTB16;ZFP36
PMID:34731602	liver_(cluster 1)	cluster L	17.7487263339416	2.52086206720835E-05	0.000273455103714389	4	CPAMD8;F9;KCNK5;UPP2
PMID:34731602	liver_(cluster 1)	cluster O	12.5292076658823	0.000400639665269843	0.00377153891788508	3	CPEB2;MAFF;SLC25A33
PMID:34731602	liver_(cluster 1)	UP	42.0408116448345	8.93882208993872E-11	1.55763729609783E-09	11	ANGPTL4;CPAMD8;CPEB2;F9;IGFBP1;KCNK5;MAFF;SLC25A32;SLC25A33;SNX10;UPP2
PMID:34731602	liver_(cluster 2)	cluster K	124.138025600664	7.85827483008555E-29	2.92542140265458E-27	6	AQP11;CEBPB;LPIN1;PER1;TOB2;USP2
PMID:34731602	liver_(cluster 2)	cluster L	34.6687259719954	3.90860580949936E-09	5.92805214440737E-08	6	APOH;ARG1;MAT1A;MFSD2A;PCK1;PRKAG3
PMID:34731602	liver_(cluster 2)	cluster O	51.9680516541586	5.64110521219622E-13	1.13094278505141E-11	6	APBB3;GADD45G;RNF169;SDC4;SYDE2;ZBTB16
PMID:34731602	liver_(cluster 2)	cluster P	98.6826703082979	2.96384437857201E-23	9.15995677754896E-22	5	DUSP1;ERRFI1;FKBP5;MAP3K6;TP53INP1
PMID:34731602	liver_(cluster 2)	UP	263.922227616155	2.39655990249839E-59	1.63565213345515E-57	28	APBB3;APOH;AQP11;ARG1;CEBPB;DUSP1;ERRFI1;FKBP5;GADD45G;KLF15;LPIN1;MAP3K6;MAT1A;MFSD2A;MT1M;PCK1;PER1;PIM3;PRKAG3;RNF169;SDC4;SGK1;SYDE2;TOB2;TP53INP1;USP2;WBP1L;ZBTB16
PMID:34731602	liver_(cluster 2)	cluster I	43.8073579168973	3.62340253700415E-11	6.59459261734756E-10	4	KLF15;PIM3;SGK1;WBP1L
PMID:34731602	liver_(cluster 3)	cluster L	34.839326687978	3.58067140322666E-09	5.53315071555214E-08	5	CPS1;EIF4EBP3;GADD45B;HAO1;PLIN5
PMID:34731602	liver_(cluster 3)	cluster P	42.8634395919638	5.86974443416246E-11	1.0338324067912E-09	3	DDIT4;FAM107A;TSC22D3
PMID:34731602	liver_(cluster 3)	UP	132.588639068561	1.11227922466402E-30	4.44369114634064E-29	17	ATP1B1;BCL2L1;CPS1;DCUN1D3;DDIT4;EIF4EBP3;EPPK1;FAM107A;GADD45B;HAO1;HSPB8;PLIN4;PLIN5;SLC25A15;TNS1;TSC22D3;TSKU
PMID:34731602	liver_(cluster 3)	cluster I	111.51308856388	4.56779647653058E-26	1.52694910786879E-24	5	EPPK1;HSPB8;PLIN4;TNS1;TSKU
PMID:34731602	liver_(cluster 4)	cluster O	16.0764082019744	6.08372374189565E-05	0.000634722260460196	3	CDKN1A;LCN2;PPP1R3B
PMID:34731602	liver_(cluster 4)	UP	43.1718062675613	5.01379728225094E-11	8.92673907426852E-10	10	APOF;CDKN1A;HP;INSIG2;LCN2;LRG1;PPP1R3B;SERPINA1;SLC45A3;SPSB1
PMID:34735568	kidney_down	cluster K	95.9060986891883	1.2046372287146E-22	3.58762869206275E-21	10	CHST15;LPIN1;PER1;SEMA7A;SLA;SPSB1;TOB2;TXNIP;USP2;ZFP36
PMID:34735568	kidney_down	cluster P	145.791592211659	1.4417912306252E-33	6.94604128165908E-32	11	ACSS1;DDIT4;ERRFI1;FKBP5;HIF3A;MAP3K6;MS4A6A;SESN1;SLC10A6;TP53INP1;TSC22D3
PMID:34735568	kidney_down	DOWN	19.1423796049586	1.21320900627788E-05	0.000138967577082739	11	APLNR;APOL2;ASB2;CD274;CD52;CIITA;GBP6;IL33;MARCKS;PCDH12;TRIL
PMID:34735568	kidney_down	UP	128.247793065045	9.90690330850212E-30	3.86369229031583E-28	42	ACSS1;ADAMTS15;ANGPTL4;CA9;CES1;CHST15;DDIT4;ERRFI1;FARP2;FKBP5;HIF3A;IGFBP1;KLF15;LPIN1;LRIG1;MAP3K6;MCF2L;MS4A6A;NT5E;PCK1;PDK4;PER1;PIM3;PLK3;POLR3E;RGCC;SEMA7A;SESN1;SGK1;SLA;SLC10A6;SLC16A9;SPSB1;TMEM252;TOB2;TP53INP1;TSC22D3;TSKU;TXNIP;USP2;ZBTB16;ZFP36
PMID:34735568	kidney_down	cluster D	21.4782924982253	3.57856796570055E-06	4.31006935868934E-05	7	APLNR;APOL2;ASB2;CD274;CD52;IL33;PCDH12
PMID:34735568	kidney_down	cluster I	15.4322400232322	8.55168106668657E-05	0.000886560353622316	5	ANGPTL4;KLF15;PIM3;SGK1;TSKU
PMID:34735568	kidney_up	DOWN	35.8418273533011	2.14003834975316E-09	3.33845982561493E-08	11	ADRB3;BHLHE40;CCL7;CHAC1;CYP24A1;ELOVL1;FFAR2;ID1;OSGIN1;PHLDA2;SOX11
PMID:34735568	kidney_up	UP	27.6876489867644	1.42570080861013E-07	1.91417862664213E-06	19	APOC1;APOH;CYP2A13;DUSP14;FGG;GDF15;HSPB8;MAFF;MRAP;MTHFD2;NPM3;OBP2A;ORM2;PLIN4;RAP1GAP;REP15;SAA4;SERPINA10;THRSP
PMID:34735568	kidney_up	cluster B	36.5189573147639	1.51188664389046E-09	2.40434011911901E-08	3	CCL7;ELOVL1;SOX11
PMID:34735568	kidney_up	cluster I	26.2688221042613	2.97045588195041E-07	3.83118640522423E-06	5	APOC1;FGG;HSPB8;NPM3;PLIN4
PMID:35904237	adrenal-gland_Y-1_down	DOWN	49.8246367480848	1.68119640945505E-12	3.27833299843734E-11	20	ADRB3;APLNR;APOL2;CD83;CIITA;DAPK2;DBP;EGFL7;ESM1;GBP6;ID1;IRF1;KCNJ8;LBH;LMCD1;LMO2;MARCKS;OSGIN1;S1PR2;SOCS3
PMID:35904237	adrenal-gland_Y-1_down	cluster C	13.8895489007005	0.000193873533777824	0.00193637102639071	5	ADRB3;CIITA;EGFL7;ID1;KCNJ8
PMID:35904237	adrenal-gland_Y-1_down	cluster D	29.4795594502034	5.65095522294711E-08	7.77837365982132E-07	10	APLNR;APOL2;CD83;DAPK2;DBP;ESM1;IRF1;LBH;LMO2;S1PR2
PMID:35904237	adrenal-gland_Y-1_up	cluster K	174.455637284937	7.87195369934124E-40	4.29808671984032E-38	17	AQP11;BCL2L1;BMP4;CEBPB;CHST15;CSRNP1;LIMS2;LPIN1;PER1;SEMA7A;SLA;SLC45A3;SPSB1;TSC22D1;TXNIP;VCAM1;ZFP36
PMID:35904237	adrenal-gland_Y-1_up	cluster M	20.9584820750061	4.69345157850837E-06	5.57092296057733E-05	5	FARP2;MCF2L;MT1M;NHSL2;PMAIP1
PMID:35904237	adrenal-gland_Y-1_up	cluster O	134.709579221663	3.82174038203285E-31	1.691894796154E-29	23	ADAMTS15;AFF1;AMPD3;ARL4D;CDKN1A;DCUN1D3;ENC1;GADD45G;IRAK2;LCN2;MAFF;MRAP;MTHFD2;NAPEPLD;NFIL3;PDK4;RNF169;SDC4;SLC16A9;SPHK1;TLE1;ZBTB16;ZNFX1
PMID:35904237	adrenal-gland_Y-1_up	cluster P	161.65828203523	4.91297998869202E-37	2.51483163171173E-35	15	DDIT4;DUSP1;ERRFI1;FAM107A;FKBP5;HIF3A;LYVE1;MAP3K6;MS4A6A;RHOB;SESN1;SLC10A6;SLC7A8;TIPARP;TSC22D3
PMID:35904237	adrenal-gland_Y-1_up	UP	309.089044664081	3.44882459268752E-69	3.13843037934565E-67	81	ACOT11;ADAMTS15;AFF1;AMPD3;AQP11;ARL4D;BCL2L1;BMP4;CDKN1A;CEBPB;CHST15;CSRNP1;DCUN1D3;DDIT4;DUSP1;ENC1;ERRFI1;FAM107A;FARP2;FKBP5;GADD45B;GADD45G;GREB1;HIF3A;IRAK2;KLF15;LCN2;LIMS2;LPIN1;LRG1;LYVE1;MAFF;MAP3K6;MCF2L;MDM1;MRAP;MS4A6A;MT1M;MTHFD2;NAPEPLD;NFIL3;NHSL2;NT5E;PDK4;PER1;PIK3IP1;PLIN4;PLIN5;PLK3;PMAIP1;RHOB;RNF169;SDC4;SEMA7A;SESN1;SGK1;SLA;SLC10A6;SLC16A9;SLC25A32;SLC45A3;SLC7A8;SNX10;SO…
PMID:35904237	adrenal-gland_Y-1_up	cluster I	17.6926413083854	2.59629050653558E-05	0.000279784463796401	7	KLF15;LRG1;PLIN4;SGK1;SNX10;TMCC3;TNS1
PMID:36284713	blood_THP-1_down	cluster M	10.7683374997084	0.00103251210801008	0.00924182968809018	3	PLEKHF1;PMAIP1;RHOU
PMID:36284713	blood_THP-1_down	DOWN	73.4126661914483	1.05188907603735E-17	2.73491159769711E-16	18	BHLHE40;CD274;CD83;CHAC1;CXCL10;DDIT4L;EFNA1;FFAR2;IL1B;IL33;IRF1;MARCKS;MEF2C;PDE4B;S1PR2;SEL1L3;SOCS3;TNFSF10
PMID:36284713	blood_THP-1_down	cluster D	68.6102191891943	1.19980749453805E-16	2.93326071052735E-15	11	BHLHE40;CD274;CD83;CXCL10;EFNA1;IL1B;IL33;IRF1;PDE4B;S1PR2;TNFSF10
PMID:36284713	blood_THP-1_down	cluster F	13.5200551577637	0.000236027479217129	0.00231504796980633	3	DDIT4L;MARCKS;SEL1L3
PMID:36284713	blood_THP-1_up	cluster K	18.5238770305589	1.67789101907631E-05	0.000188245581455274	5	PER1;SLA;TXNIP;USP2;ZFP36
PMID:36284713	blood_THP-1_up	cluster P	124.392136663926	6.913699915046E-29	2.63363731647566E-27	10	ACSS1;DDIT4;DUSP1;ERRFI1;FKBP5;LYVE1;MAP3K6;RHOB;SESN1;TSC22D3
PMID:36284713	blood_THP-1_up	UP	46.1504509761035	1.09511805001608E-11	2.08581786735621E-10	28	ACOT11;ACSS1;AFF1;ARL4A;CCL17;DDIT4;DUSP1;ERRFI1;FKBP5;FOS;KLF15;KLHL6;LYVE1;MAP3K6;MT1M;PDK4;PER1;RHOB;SESN1;SLA;SNX10;TES;TNS1;TSC22D3;TXNIP;USP2;ZBTB16;ZFP36
