# Supplementary material for: A cross-tissue transcriptomic approach decodes glucocorticoid receptor-dependent links to human metabolic phenotypes
Source: Research Square preprint supplement (doi:10.21203/rs.3.rs-6147414/v1), 2025-04-18
Supplement: Supplementary file 4 [file 6ac6b3cdfaea00cac57e8d68.xlsx]

## Sheet: Phenotypes
phenotype	phenotype ID	GR_dependent_transcriptional_pattern	chi2_value	p_value	fdr	number_of_overlapping_genes	overlapping_genes
Other bread intake	101270	DOWN	24.100045501418	9.14581357081056e-07	0.000330289394088368	4	APOL2;LMCD1;NUAK1;S1PR2
Varicose veins surgery (1479 operation code)	20004	cluster D	18.272052636064	1.91496082201929e-05	0.00366981121905024	3	LBH;SOX18;SOX7
Reticulocyte percentage	30240	cluster I	16.3142813907618	5.36580299592568e-05	0.00914416453409568	7	ALAS1;ANGPTL4;APOC1;SERPINA1;SMOX;TNS1;WBP1L
Immature reticulocyte fraction	30280	cluster I	56.2855700790041	6.26737001142076e-14	2.74134764299544e-10	9	ALAS1;ANGPTL4;APOC1;LRG1;PLIN4;SERPINA1;SMOX;TNS1;WBP1L
High light scatter reticulocyte percentage	30290	cluster I	20.437456509742	6.16120413739266e-06	0.00144370215519405	8	ALAS1;ANGPTL4;APOC1;PLIN4;SERPINA1;SMOX;TNS1;WBP1L
High light scatter reticulocyte count	30300	cluster I	20.5176443023461	5.90840948182673e-06	0.00140963907673692	8	ALAS1;ANGPTL4;APOC1;PLIN4;SERPINA1;SMOX;TNS1;WBP1L
Alanine aminotransferase	30620	cluster D	16.8836948497578	3.97415049734514e-05	0.00714367162002232	6	IL1B;IRF1;PDE4B;S1PR2;SOX7;TNFSF10
Peak expiratory flow (PEF)	3064	cluster K	30.6953287466509	3.01890950560278e-08	2.44652995525663e-05	4	ADAMTS9;BMP4;CEBPB;SLC45A3
Triglycerides	30870	cluster L	16.4742575472676	4.93151273200394e-05	0.00862817467591409	11	ACOT11;APOC4;APOH;ASGR1;BHMT;F2;ITIH4;MFSD2A;PCK1;SLCO1B1;VTN
Triglycerides	30870	UP	24.8443895262287	6.21496677857492e-07	0.000239861159024883	29	ACOT11;AFF1;ANGPTL4;APOA1;APOC1;APOC4;APOH;ARL4D;ARRDC3;ASGR1;BHMT;CDKAL1;CPEB2;F2;FGFR2;GADD45G;ITIH4;MAFF;MFSD2A;PCK1;PMAIP1;PPP1R3B;PPP2R3A;SLC16A9;SLCO1B1;SNX10;TRNP1;TSKU;VTN
Triglycerides	30870	cluster I	24.855440065193	6.17944119360013e-07	0.000239861159024883	7	ANGPTL4;APOA1;APOC1;CDKAL1;PPP2R3A;SNX10;TSKU
Systolic blood pressure, automated reading	4080	cluster O	19.5380435833344	9.86160190565614e-06	0.002156732336767	7	ADAMTS15;AMPD3;ARL4A;CPEB2;FGFR2;PPP1R3B;RPRML
I83 Varicose veins of lower extremities	131402	DOWN	26.4858313529246	2.65478153600793e-07	0.000124414440412486	3	LBH;SOX18;SOX7
I83 Varicose veins of lower extremities	131402	cluster D	67.6819336802127	1.92115841079441e-16	1.26047203332221e-12	3	LBH;SOX18;SOX7
I86 Varicose veins of other sites	131408	DOWN	28.8760173788352	7.71624224721222e-08	4.60238776217812e-05	3	LBH;SOX18;SOX7
I86 Varicose veins of other sites	131408	cluster D	73.2502723642306	1.1420941106955e-17	1.49865589205464e-13	3	LBH;SOX18;SOX7
6mm weak meridian (right)	5098	cluster K	18.9694062583622	1.32831308048363e-05	0.0027666863876359	3	ADAMTS9;BMP4;TSC22D1
Systolic blood presure adjusted by medication		cluster O	21.4809503419292	3.57361134484378e-06	0.000937858561340802	10	ADAMTS15;ADRB2;AMPD3;ARL4A;CPEB2;FGFR2;LARP4;MRAP;PPP1R3B;RPRML

## Sheet: Metabolites
human metabolism-related trait	OMICSPRED ID	GR-dependent transcriptional pattern	chi-square value	p-value	fdr	number of overlapping genes	overlapping genes
Apolipoprotein B	OPGS003444	cluster I	38.6673399283533	5.02548099953332E-10	7.56563321384289E-08	3	ANGPTL4;APOA1;APOC1
HDL diameter	OPGS003447	cluster L	14.9566593600306	0.000110009107943181	0.00792065577190902	3	APOC4;ASGR1;PON1
HDL diameter	OPGS003447	UP	16.7861362048628	4.18378536706946E-05	0.00341538309683586	6	ANGPTL4;APOA1;APOC1;APOC4;ASGR1;PON1
HDL diameter	OPGS003447	cluster I	49.6042276795323	1.88107917445177E-12	3.63424496504081E-10	3	ANGPTL4;APOA1;APOC1
LDL diameter	OPGS003529	cluster L	33.931504229051	5.70867963951852E-09	7.78529580956454E-07	3	APOC4;ASGR1;HP
LDL diameter	OPGS003529	UP	26.847996695543	2.20102388526213E-07	2.65773634145402E-05	5	APOA1;APOC1;APOC4;ASGR1;HP
VLDL diameter	OPGS003462	cluster I	50.2650713933053	1.34319139829838E-12	2.88338420168052E-10	3	ANGPTL4;APOA1;APOC1
Extremely large VLDL cholesterol in chylomicrons	OPGS003510	cluster I	70.3865203242142	4.8751913215299E-17	4.34717059993651E-14	3	ANGPTL4;APOA1;APOC1
Large VLDL cholesterol	OPGS003483	cluster I	57.0288331657553	4.29468961392099E-14	1.31010636854137E-11	3	ANGPTL4;APOA1;APOC1
Medium VLDL cholesterol	OPGS003492	cluster I	53.8272133864172	2.18919391184655E-13	5.76753086957392E-11	3	ANGPTL4;APOA1;APOC1
Small HDL cholesterol	OPGS003535	UP	16.4966463281094	4.87362023979456E-05	0.00389620729791024	4	APOA1;APOC1;APOC4;ASGR1
Small VLDL cholesterol	OPGS003501	cluster I	57.8849022417798	2.77911965180199E-14	8.94876527880241E-12	3	ANGPTL4;APOA1;APOC1
Very large VLDL cholesterol	OPGS003506	cluster I	66.8141336161995	2.98351365882197E-16	1.50369088404628E-13	3	ANGPTL4;APOA1;APOC1
Extremely large VLDL cholesteryl esters chylomicrons	OPGS003514	cluster I	75.7456783738896	3.22656504417926E-18	4.15581577690289E-15	3	ANGPTL4;APOA1;APOC1
Large VLDL cholesteryl esters	OPGS003471	cluster I	58.7651185646038	1.77663143998734E-14	6.05726813303918E-12	3	ANGPTL4;APOA1;APOC1
Medium VLDL cholesteryl esters	OPGS00347	cluster I	52.3481600397465	4.6483389053005E-13	1.12257384563007E-10	3	ANGPTL4;APOA1;APOC1
Small VLDL cholesteryl esters	OPGS003517	cluster I	56.1959323989424	6.55971040826051E-14	1.85463812323307E-11	3	ANGPTL4;APOA1;APOC1
Very large VLDL cholesteryl esters	OPGS003496	cluster I	66.8141336161995	2.98351365882197E-16	1.50369088404628E-13	3	ANGPTL4;APOA1;APOC1
Concentration of chylomicrons and extremely large VLDL particles	OPGS003489	cluster I	67.9664791241628	1.66298749890629E-16	9.63867554366086E-14	3	ANGPTL4;APOA1;APOC1
Concentration of large VLDL particles	OPGS003494	cluster I	49.6042276795323	1.88107917445177E-12	3.63424496504081E-10	3	ANGPTL4;APOA1;APOC1
Concentration of medium VLDL particles	OPGS003477	cluster I	48.9591459627841	2.61349748250513E-12	4.88639722858056E-10	3	ANGPTL4;APOA1;APOC1
Concentration of smal lVLDL particles	OPGS003466	cluster I	49.6042276795323	1.88107917445177E-12	3.63424496504081E-10	3	ANGPTL4;APOA1;APOC1
Concentration of very large VLDL particles	OPGS003502	cluster I	60.6021924510332	6.98561631984576E-15	2.61216981869845E-12	3	ANGPTL4;APOA1;APOC1
Free cholesterol in chylomicrons and extremely large VLDL	OPGS003509	cluster I	74.3353128020056	6.59138364046165E-18	7.64073191602314E-15	3	ANGPTL4;APOA1;APOC1
Large HDL free cholesterol	OPGS003468	cluster I	67.9664791241628	1.66298749890629E-16	9.63867554366086E-14	3	ANGPTL4;APOA1;APOC1
Large VHDL free cholesterol	OPGS003507	cluster I	54.5959776577586	1.48038327109813E-13	4.08585782823085E-11	3	ANGPTL4;APOA1;APOC1
Medium VLDL free cholesterol	OPGS003490	cluster I	49.6042276795323	1.88107917445177E-12	3.63424496504081E-10	3	ANGPTL4;APOA1;APOC1
Small VLDL free cholesterol	OPGS003474	cluster I	50.2650713933053	1.34319139829838E-12	2.88338420168052E-10	3	ANGPTL4;APOA1;APOC1
Very large VLDL free cholesterol	OPGS003513	cluster I	69.1566443665827	9.09454602893255E-17	6.20141044514036E-14	3	ANGPTL4;APOA1;APOC1
Monounsaturated fatty acids	OPGS003524	cluster I	56.1959323989424	6.55971040826051E-14	1.85463812323307E-11	3	ANGPTL4;APOA1;APOC1
Phospholipids in chylomicrons and extremely large VLDL	OPGS003487	cluster I	66.8141336161995	2.98351365882197E-16	1.50369088404628E-13	3	ANGPTL4;APOA1;APOC1
Large VLDL phospholipids	OPGS003499	cluster I	52.3481600397465	4.6483389053005E-13	1.12257384563007E-10	3	ANGPTL4;APOA1;APOC1
Medium VLDL phospholipids	OPGS003476	cluster I	48.9591459627841	2.61349748250513E-12	4.88639722858056E-10	3	ANGPTL4;APOA1;APOC1
Small HDL phospholipids	OPGS003534	cluster I	71.6581261798987	2.55906005541059E-17	2.69678401475632E-14	3	APOA1;APOA2;APOC1
Small VLDL phospholipids	OPGS003463	cluster I	47.1130376646505	6.70084693150927E-12	1.17691238833417E-09	3	ANGPTL4;APOA1;APOC1
Very large HDL phospholipids	OPGS003448	cluster I	51.6364090934994	6.67914000058706E-13	1.5484918177361E-10	3	ANGPTL4;APOA1;APOC1
Very large VLDL phospholipids	OPGS003516	cluster I	65.6978350482363	5.25635755820144E-16	2.25672951165449E-13	3	ANGPTL4;APOA1;APOC1
Total lipids in chylomicrons and extremely large VLDL	OPGS003491	cluster I	67.9664791241628	1.66298749890629E-16	9.63867554366086E-14	3	ANGPTL4;APOA1;APOC1
Large VLDL total lipids	OPGS003493	cluster I	50.2650713933053	1.34319139829838E-12	2.88338420168052E-10	3	ANGPTL4;APOA1;APOC1
Medium VLDL total lipids	OPGS003475	cluster I	49.6042276795323	1.88107917445177E-12	3.63424496504081E-10	3	ANGPTL4;APOA1;APOC1
Small VLDL total lipids	OPGS003467	cluster I	49.6042276795323	1.88107917445177E-12	3.63424496504081E-10	3	ANGPTL4;APOA1;APOC1
Very large VLDL total lipids	OPGS003500	cluster I	60.6021924510332	6.98561631984576E-15	2.61216981869845E-12	3	ANGPTL4;APOA1;APOC1
Total triglycerides	OPGS003486	cluster I	47.7140691886716	4.93139915846071E-12	8.79458139151947E-10	3	ANGPTL4;APOA1;APOC1
Triglycerides in chylomicrons and extremely large VLDL	OPGS003482	cluster I	69.1566443665827	9.09454602893255E-17	6.20141044514036E-14	3	ANGPTL4;APOA1;APOC1
HDL triglycerides	OPGS003484	cluster I	80.2963646982926	3.22261408842104E-19	5.33664893042524E-16	3	ANGPTL4;APOA1;APOC1
IDL triglycerides	OPGS003450	cluster I	56.1959323989424	6.55971040826051E-14	1.85463812323307E-11	3	ANGPTL4;APOA1;APOC1
Large LDL triglycerides	OPGS003460	cluster I	70.3865203242142	4.8751913215299E-17	4.34717059993651E-14	3	ANGPTL4;APOA1;APOC1
Large VLDL triglycerides	OPGS003498	cluster I	51.6364090934994	6.67914000058706E-13	1.5484918177361E-10	3	ANGPTL4;APOA1;APOC1
LDL triglycerides	OPGS003464	UP	15.0045211752656	0.000107253909974998	0.00777054577768862	5	ANGPTL4;APOA1;APOC1;APOC4;HP
LDL triglycerides	OPGS003464	cluster I	65.6978350482363	5.25635755820144E-16	2.25672951165449E-13	3	ANGPTL4;APOA1;APOC1
Medium HDL triglycerides	OPGS003518	cluster I	58.7651185646038	1.77663143998734E-14	6.05726813303918E-12	3	ANGPTL4;APOA1;APOC1
Medium VLDL triglycerides	OPGS003481	cluster I	45.9515718614345	1.21212631141444E-11	2.03637220317626E-09	3	ANGPTL4;APOA1;APOC1
Small HDL triglycerides	OPGS003508	cluster I	69.1566443665827	9.09454602893255E-17	6.20141044514036E-14	3	ANGPTL4;APOA1;APOC1
Small LDL triglycerides	OPGS003480	cluster I	57.0288331657553	4.29468961392099E-14	1.31010636854137E-11	3	ANGPTL4;APOA1;APOC1
Small VLDL triglycerides	OPGS003465	cluster I	43.2645701331079	4.7816379794846E-11	7.49037127813317E-09	3	ANGPTL4;APOA1;APOC1
Very large HDL triglycerides	OPGS003495	cluster I	87.23140370125	9.65387252361728E-21	2.23815380587543E-17	3	APOA1;APOA2;APOC1
Very large VLDL triglycerides	OPGS003504	cluster I	57.8849022417798	2.77911965180199E-14	8.94876527880241E-12	3	ANGPTL4;APOA1;APOC1
Very small VLDL triglycerides	OPGS003453	cluster I	48.3292699415153	3.60333366861916E-12	6.63013395025926E-10	3	ANGPTL4;APOA1;APOC1
VLDL triglycerides	OPGS003479	cluster I	45.9515718614345	1.21212631141444E-11	2.03637220317626E-09	3	ANGPTL4;APOA1;APOC1
VLDL cholesterol	OPGS003488	cluster I	50.942260877331	9.51233261112873E-13	2.16209724761185E-10	3	ANGPTL4;APOA1;APOC1
