# Supplementary material for: A cross-tissue transcriptomic approach decodes glucocorticoid receptor-dependent links to human metabolic phenotypes
Source: Research Square preprint supplement (doi:10.21203/rs.3.rs-6147414/v1), 2025-04-18
Supplement: Supplementary file 5 [file a37402261df0fae0c94ebc48.xlsx]

## Sheet: A
Gene expression changes in cluster A occur in the following tissues: ADR, FAT, LIV, MUS.
TF	cluster	Term	Overlap	P.value	Adjusted.P.value	Odds.Ratio	Combined.Score	Genes	TF_rank	nuclear_receptors	mapped_name	tissue_cpm_gtex	tissue_log2_microarray	pattern_tissue_colocalization_gtex	pattern_tissue_colocalization_microarray
STAT3	cluster_A	STAT3 20064451 ChIP-Seq CD4+T Mouse	4/843	0.000333162	0.0714298	18.262	146.22	GBP6;SPATA13;OSGIN1;CHAC1	top1	TRUE	STAT3	FAT:340.576|ADR:211.046|LUN:379.986|HTH:84.265|SPL:245.921|MUS:202.483|LIV:253.363|KID:NA|PIT:215.108	FAT:11.883|ADR:11.373|LUN:NA|HTH:10.396|SPL:11.569|MUS:11.368|LIV:11.861|KID:11.161|PIT:11.776	TRUE	TRUE
LMO2	cluster_A	LMO2 26923725 Chip-Seq MACROPHAGESS Mouse	3/346	0.000399049	0.0714298	28.641	224.16	MEF2C;ACOT2;DCLK3	top2	FALSE	LMO2	FAT:24.274|ADR:12.937|LUN:41.635|HTH:31.271|SPL:41.595|MUS:20.416|LIV:NA|KID:NA|PIT:29.506	FAT:11.063|ADR:11.887|LUN:NA|HTH:11.308|SPL:14.235|MUS:10.811|LIV:10.227|KID:10.9|PIT:11.715	FALSE	TRUE
THRA	cluster_A	THRA 23701648 ChIP-Seq CEREBELLUM Mouse	2/146	0.00184235	0.157587	39.379	247.958	MEF2C;DCLK3	top3	TRUE	THRA	FAT:95.174|ADR:96.875|LUN:87.295|HTH:249.908|SPL:38.755|MUS:86.579|LIV:19.045|KID:NA|PIT:116.413	FAT:10.48|ADR:9.574|LUN:NA|HTH:11.56|SPL:9.108|MUS:10.238|LIV:8.704|KID:9.68|PIT:9.995	TRUE	TRUE
PPARD	cluster_A	PPARD 23176727 ChIP-Seq KERATINOCYTES Mouse	2/164	0.00231663	0.157587	34.972	212.196	OSGIN1;CHAC1	top4	TRUE	PPARD	FAT:48.194|ADR:43.799|LUN:75.3|HTH:42.077|SPL:75.982|MUS:36.087|LIV:40.351|KID:NA|PIT:67.106	FAT:11.069|ADR:11.504|LUN:NA|HTH:10.436|SPL:10.734|MUS:11.385|LIV:10.245|KID:10.607|PIT:11.395	TRUE	TRUE
LMO2	cluster_A	LMO2 26923725 Chip-Seq HEMOGENIC-ENDOTHELIUM Mouse	4/1517	0.00304618	0.157587	9.77	56.608	MEF2C;ACOT2;OSGIN1;RNF186	top5	FALSE	LMO2	FAT:24.274|ADR:12.937|LUN:41.635|HTH:31.271|SPL:41.595|MUS:20.416|LIV:NA|KID:NA|PIT:29.506	FAT:11.063|ADR:11.887|LUN:NA|HTH:11.308|SPL:14.235|MUS:10.811|LIV:10.227|KID:10.9|PIT:11.715	FALSE	TRUE
RXR	cluster_A	RXR 22158963 ChIP-Seq LIVER Mouse	4/1546	0.00326612	0.157587	9.571	54.789	ACOT2;OSGIN1;CHAC1;INHBE	top6	TRUE	RXRA	FAT:132.69|ADR:129.546|LUN:90.793|HTH:59.489|SPL:141.53|MUS:235.963|LIV:227.376|KID:NA|PIT:128.713	FAT:9.134|ADR:8.297|LUN:NA|HTH:8.121|SPL:8.228|MUS:8.958|LIV:10.024|KID:9.071|PIT:7.911	TRUE	TRUE
PPARA	cluster_A	PPARA 22158963 ChIP-Seq LIVER Mouse	4/1552	0.00331298	0.157587	9.531	54.423	SPATA13;OSGIN1;RNF186;INHBE	top7	TRUE	PPARA	FAT:30.052|ADR:36.633|LUN:20.511|HTH:18.688|SPL:20.631|MUS:57.029|LIV:110.083|KID:NA|PIT:19.972	FAT:7.933|ADR:8.027|LUN:NA|HTH:7.578|SPL:7.47|MUS:8.145|LIV:9.407|KID:8.48|PIT:7.538	TRUE	TRUE
LXR	cluster_A	LXR 22158963 ChIP-Seq LIVER Mouse	4/1578	0.0035215	0.157587	9.361	52.877	SPATA13;OSGIN1;CHAC1;INHBE	top8	TRUE	NR1H3	FAT:85.357|ADR:27.267|LUN:41.438|HTH:NA|SPL:91.42|MUS:NA|LIV:61.118|KID:NA|PIT:13.787	FAT:12.356|ADR:10.386|LUN:NA|HTH:8.746|SPL:12.001|MUS:10.815|LIV:12.363|KID:11.505|PIT:9.269	TRUE	TRUE
KDM2B	cluster_A	KDM2B 26808549 Chip-Seq SIL-ALL Human	4/1652	0.00416512	0.165679	8.904	48.805	MEF2C;SPATA13;DCLK3;CHAC1	top9	FALSE	KDM2B	FAT:24.795|ADR:18.857|LUN:36.24|HTH:19.149|SPL:54.757|MUS:12.678|LIV:18.981|KID:NA|PIT:27.482	FAT:9.521|ADR:9.548|LUN:NA|HTH:9.883|SPL:10.717|MUS:9.461|LIV:9.297|KID:9.557|PIT:9.449	TRUE	TRUE
TEAD4	cluster_A	TEAD4 26923725 Chip-Seq HEMANGIOBLAST Mouse	2/406	0.0134657	0.438246	13.852	59.67	MEF2C;OSGIN1	top11	FALSE	TEAD4	FAT:15.884|ADR:NA|LUN:25.886|HTH:NA|SPL:NA|MUS:57.98|LIV:NA|KID:NA|PIT:NA	FAT:7.913|ADR:7.725|LUN:NA|HTH:7.723|SPL:7.718|MUS:8.092|LIV:7.737|KID:7.94|PIT:7.785	TRUE	TRUE
POU5F1	cluster_A	POU5F1 26923725 Chip-Seq MESODERM Mouse	2/406	0.0134657	0.438246	13.852	59.67	MEF2C;OSGIN1	top10	FALSE	POU5F1	FAT:NA|ADR:NA|LUN:NA|HTH:NA|SPL:NA|MUS:NA|LIV:NA|KID:NA|PIT:NA	FAT:8.022|ADR:7.925|LUN:NA|HTH:7.917|SPL:8.231|MUS:8.23|LIV:8.082|KID:7.875|PIT:8.217	FALSE	TRUE
JARID1B-DAIN	cluster_A	JARID1B-DAIN 22020125 ChIP-Seq ESCs Mouse	3/1470	0.0237865	0.506497	6.314	23.604	GBP6;DCLK3;RNF186	top12	FALSE		ADR:NA|FAT:NA|LIV:NA|MUS:NA	ADR:NA|FAT:NA|LIV:NA|MUS:NA	FALSE	FALSE
FOXO3	cluster_A	FOXO3 23340844 ChIP-Seq DLD1 Human	2/576	0.0260643	0.506497	9.665	35.25	MEF2C;SPATA13	top13	FALSE	FOXO3	FAT:127.277|ADR:30.108|LUN:137.522|HTH:35.34|SPL:70.519|MUS:180.669|LIV:34.652|KID:NA|PIT:42.973	FAT:8.267|ADR:8.149|LUN:NA|HTH:8.21|SPL:9.297|MUS:7.997|LIV:8.691|KID:8.728|PIT:8.243	TRUE	TRUE
OCT4	cluster_A	OCT4 20526341 ChIP-Seq ESCs Human	3/1578	0.0286954	0.506497	5.846	20.76	GBP6;DCLK3;OSGIN1	top14	FALSE	POU5F1	FAT:NA|ADR:NA|LUN:NA|HTH:NA|SPL:NA|MUS:NA|LIV:NA|KID:NA|PIT:NA	FAT:8.022|ADR:7.925|LUN:NA|HTH:7.917|SPL:8.231|MUS:8.23|LIV:8.082|KID:7.875|PIT:8.217	FALSE	TRUE
GATA3	cluster_A	GATA3 22897851 ChIP-Seq JUKARTE6-1 Human	3/1587	0.0291281	0.506497	5.81	20.545	GBP6;DCLK3;RNF186	top15	FALSE	GATA3	FAT:NA|ADR:NA|LUN:NA|HTH:NA|SPL:12.747|MUS:NA|LIV:NA|KID:NA|PIT:11.306	FAT:8.584|ADR:9.672|LUN:NA|HTH:7.831|SPL:8.586|MUS:7.963|LIV:7.818|KID:9.487|PIT:7.671	FALSE	TRUE
NFYB	cluster_A	NFYB 21822215 ChIP-Seq K562 Human	3/1594	0.0294673	0.506497	5.783	20.38	GBP6;SPATA13;RNF186	top16	FALSE	NFYB	ADR:48.731|FAT:39.609|LIV:18.981|MUS:25.713	ADR:9.62|FAT:9.657|LIV:10.765|MUS:10.398	FALSE	TRUE
TAF2	cluster_A	TAF2 19829295 ChIP-Seq ESCs Human	3/1595	0.0295159	0.506497	5.779	20.357	GBP6;MEF2C;DCLK3	top17	FALSE	TAF2	FAT:24.999|ADR:25.869|LUN:21.952|HTH:11.923|SPL:24.652|MUS:NA|LIV:11.37|KID:NA|PIT:22.372	FAT:8.69|ADR:9.228|LUN:NA|HTH:9.434|SPL:9.316|MUS:8.922|LIV:9.805|KID:8.777|PIT:8.889	FALSE	TRUE
RUNX2	cluster_A	RUNX2 24764292 ChIP-Seq MC3T3 Mouse	3/1600	0.0297597	0.506497	5.759	20.24	SPATA13;DCLK3;OSGIN1	top18	FALSE	RUNX2	FAT:NA|ADR:NA|LUN:10.52|HTH:NA|SPL:11.345|MUS:NA|LIV:NA|KID:NA|PIT:NA	FAT:7.726|ADR:7.531|LUN:NA|HTH:7.676|SPL:7.522|MUS:7.608|LIV:7.615|KID:7.56|PIT:7.583	FALSE	FALSE
NR1I2	cluster_A	NR1I2 20693526 ChIP-Seq LIVER Mouse	2/631	0.0308835	0.506497	8.795	30.585	SPATA13;OSGIN1	top19	TRUE	NR1I2	FAT:NA|ADR:NA|LUN:NA|HTH:NA|SPL:NA|MUS:NA|LIV:98.869|KID:NA|PIT:NA	FAT:7.541|ADR:7.633|LUN:NA|HTH:7.561|SPL:7.532|MUS:8.028|LIV:11.198|KID:8.497|PIT:7.618	TRUE	TRUE
CTCF	cluster_A	CTCF 27219007 Chip-Seq Bcells Human	3/1633	0.0313972	0.506497	5.632	19.493	GBP6;ACOT2;RNF186	top20	FALSE	CTCF	FAT:38.255|ADR:31.72|LUN:38.483|HTH:25.258|SPL:52.024|MUS:34.038|LIV:19.431|KID:NA|PIT:33.605	FAT:10.174|ADR:10.54|LUN:NA|HTH:10.095|SPL:11.249|MUS:10.172|LIV:10.004|KID:10.241|PIT:10.401	TRUE	TRUE
SA1	cluster_A	SA1 27219007 Chip-Seq ERYTHROID Human	3/1646	0.0320558	0.506497	5.584	19.209	ACOT2;OSGIN1;RNF186	top21	FALSE	STAG1	FAT:47.711|ADR:30.672|LUN:40.663|HTH:20.124|SPL:34.931|MUS:33.721|LIV:16.155|KID:NA|PIT:28.303	FAT:10.516|ADR:10.148|LUN:NA|HTH:9.63|SPL:9.751|MUS:9.815|LIV:9.527|KID:9.862|PIT:9.823	FALSE	TRUE
KLF4	cluster_A	KLF4 26769127 Chip-Seq PDAC-Cell Line Human	3/1678	0.0337096	0.506497	5.467	18.535	ACOT2;RNF186;INHBE	top22	FALSE	KLF4	FAT:222.672|ADR:32.645|LUN:183.608|HTH:11.975|SPL:80.849|MUS:23.755|LIV:NA|KID:NA|PIT:22.653	FAT:10.572|ADR:8.77|LUN:NA|HTH:8.333|SPL:8.737|MUS:9.745|LIV:8.333|KID:8.912|PIT:8.471	TRUE	TRUE
OLIG2	cluster_A	OLIG2 23332759 ChIP-Seq OLIGODENDROCYTES Mouse	3/1679	0.0337621	0.506497	5.464	18.514	SPATA13;DCLK3;CHAC1	top23	FALSE	OLIG2	FAT:NA|ADR:NA|LUN:NA|HTH:46.407|SPL:NA|MUS:NA|LIV:NA|KID:NA|PIT:NA	FAT:7.909|ADR:7.713|LUN:NA|HTH:8.148|SPL:7.661|MUS:7.631|LIV:7.886|KID:7.631|PIT:7.497	FALSE	TRUE
TRIM28	cluster_A	TRIM28 17542650 ChIP-ChIP NTERA2 Human	2/668	0.0343156	0.506497	8.29	27.957	MEF2C;INHBE	top24	FALSE	TRIM28	FAT:146.817|ADR:145.978|LUN:165.394|HTH:74.057|SPL:221.222|MUS:123.993|LIV:78.687|KID:NA|PIT:165.71	FAT:10.707|ADR:11.889|LUN:NA|HTH:11.855|SPL:12.317|MUS:11.002|LIV:11.144|KID:11.009|PIT:11.904	TRUE	TRUE
MITF	cluster_A	MITF 21258399 ChIP-Seq MELANOMA Human	5/4614	0.0353699	0.506497	4.172	13.941	MEF2C;SPATA13;OSGIN1;CHAC1;RNF186	top25	FALSE	MITF	FAT:20.486|ADR:NA|LUN:21.118|HTH:NA|SPL:NA|MUS:73.932|LIV:NA|KID:NA|PIT:12.973	FAT:7.578|ADR:7.728|LUN:NA|HTH:7.658|SPL:7.843|MUS:7.88|LIV:7.776|KID:7.842|PIT:7.658	TRUE	FALSE
FOXP1	cluster_A	FOXP1 21924763 ChIP-Seq HESCs Human	4/3273	0.0452053	0.582804	4.092	12.672	ACOT2;OSGIN1;CHAC1;INHBE	top26	FALSE	FOXP1	FAT:55.251|ADR:14.034|LUN:79.274|HTH:15.071|SPL:45.756|MUS:16.75|LIV:23.418|KID:NA|PIT:43.185	FAT:8.598|ADR:9.128|LUN:NA|HTH:9.462|SPL:11.206|MUS:8.724|LIV:9.373|KID:8.909|PIT:9.714	TRUE	TRUE
GRHL2	cluster_A	GRHL2 25758223 ChIP-Seq PLACENTA Mouse	2/788	0.0464372	0.582804	6.981	21.43	GBP6;SPATA13	top27	FALSE		ADR:NA|FAT:NA|LIV:NA|MUS:NA	ADR:NA|FAT:NA|LIV:NA|MUS:NA	FALSE	FALSE
PITX1	cluster_A	PITX1 30713093 ChIP-Seq Epithelial Human Tongue SCC	1/109	0.0480034	0.582804	23.013	69.878	GBP6	top28	FALSE		ADR:NA|FAT:NA|LIV:NA|MUS:NA	ADR:NA|FAT:NA|LIV:NA|MUS:NA	FALSE	FALSE
SOX2	cluster_A	SOX2 20726797 ChIP-Seq SW620 Human	3/1931	0.0484188	0.582804	4.684	14.184	ACOT2;CHAC1;INHBE	top29	FALSE	SOX2	FAT:NA|ADR:NA|LUN:NA|HTH:64.448|SPL:NA|MUS:NA|LIV:NA|KID:NA|PIT:25.59	FAT:8.007|ADR:7.668|LUN:NA|HTH:9.112|SPL:7.868|MUS:7.815|LIV:8.148|KID:7.91|PIT:8.309	TRUE	TRUE

## Sheet: B
Gene expression changes in cluster B occur in the following tissues: ADR, FAT, LIV, LUN.
TF	cluster	Term	Overlap	P.value	Adjusted.P.value	Odds.Ratio	Combined.Score	Genes	TF_rank	nuclear_receptors	mapped_name	tissue_cpm_gtex	tissue_log2_microarray	pattern_tissue_colocalization_gtex	pattern_tissue_colocalization_microarray
SMC1	cluster_B	SMC1 22415368 ChIP-Seq MEFs Mouse	5/1583	5.66103e-05	0.0213421	29.175	285.308	SOCS3;DOCK4;CCL7;WNT3A;SOX11	top1	FALSE	SMC1A	FAT:55.599|ADR:47.699|LUN:64.819|HTH:31.574|SPL:78.636|MUS:57.771|LIV:35.786|KID:NA|PIT:45.745	FAT:11.479|ADR:11.666|LUN:NA|HTH:11.251|SPL:12.499|MUS:10.99|LIV:11.235|KID:11.173|PIT:11.602	TRUE	TRUE
CNOT3	cluster_B	CNOT3 19339689 ChIP-ChIP MESCs Mouse	4/1083	0.000262291	0.0494419	23.372	192.729	SOCS3;ELOVL1;DOCK4;SOX11	top2	FALSE	CNOT3	ADR:61.174|FAT:49.065|LIV:35.984|LUN:62.474|HTH:30.634|SPL:87.862|MUS:27.031|KID:NA|PIT:99.379	ADR:9.749|FAT:8.858|LIV:9.651|LUN:NA|HTH:9.978|SPL:10.484|MUS:9.469|KID:9.245|PIT:10.143	TRUE	TRUE
GATA2	cluster_B	GATA2 21186366 ChIP-Seq BM-HSCs Mouse	4/1495	0.00090567	0.0700614	16.545	115.932	SOCS3;DOCK4;WNT3A;SOX11	top3	FALSE	GATA2	FAT:27.196|ADR:NA|LUN:85.161|HTH:NA|SPL:28.334|MUS:NA|LIV:NA|KID:NA|PIT:24.818	FAT:9.421|ADR:11.858|LUN:NA|HTH:9.086|SPL:9.99|MUS:9.922|LIV:8.806|KID:10.79|PIT:12.158	TRUE	TRUE
SMC3	cluster_B	SMC3 22415368 ChIP-Seq MEFs Mouse	4/1546	0.00102917	0.0700614	15.954	109.749	SOCS3;CCL7;WNT3A;SOX11	top4	FALSE	SMC3	FAT:39.404|ADR:30.955|LUN:36.623|HTH:22.5|SPL:44.858|MUS:26.496|LIV:14.383|KID:NA|PIT:39.443	FAT:10.113|ADR:9.841|LUN:NA|HTH:9.385|SPL:9.564|MUS:9.215|LIV:9.016|KID:9.47|PIT:9.967	FALSE	TRUE
AR	cluster_B	AR 20517297 ChIP-Seq VCAP Human	4/1604	0.00118392	0.0700614	15.328	103.291	SOCS3;DOCK4;CCL7;WNT3A	top5	TRUE	AR	FAT:22.63|ADR:NA|LUN:11.074|HTH:NA|SPL:NA|MUS:21.013|LIV:83.029|KID:NA|PIT:16.267	FAT:9.095|ADR:10.105|LUN:NA|HTH:9.013|SPL:8.187|MUS:9.799|LIV:8.087|KID:9.543|PIT:9.329	TRUE	TRUE
RING1B	cluster_B	RING1B 27294783 Chip-Seq NPCs Mouse	4/1632	0.00126433	0.0700614	15.041	100.371	SOCS3;DOCK4;WNT3A;SOX11	top6	FALSE	RING1	FAT:43.579|ADR:45.316|LUN:48.936|HTH:41.288|SPL:50.382|MUS:21.29|LIV:30.618|KID:NA|PIT:108.14	FAT:9.837|ADR:11.22|LUN:NA|HTH:10.87|SPL:10.435|MUS:10.191|LIV:9.856|KID:10.3|PIT:10.647	TRUE	TRUE
GATA1	cluster_B	GATA1 26923725 Chip-Seq HPCs Mouse	2/160	0.00130087	0.0700614	50.215	333.666	SOCS3;SOX11	top7	FALSE	GATA1	FAT:NA|ADR:NA|LUN:NA|HTH:NA|SPL:NA|MUS:NA|LIV:NA|KID:NA|PIT:NA	FAT:8.188|ADR:8.019|LUN:NA|HTH:7.797|SPL:9.354|MUS:7.96|LIV:7.701|KID:7.752|PIT:7.831	FALSE	TRUE
DNAJC2	cluster_B	DNAJC2 21179169 ChIP-ChIP NT2 Human	3/758	0.00169264	0.0797658	19.111	121.954	SOCS3;CCL7;WNT3A	top8	FALSE	DNAJC2	FAT:29.29|ADR:26.862|LUN:25.293|HTH:19.089|SPL:32.62|MUS:26.882|LIV:17.51|KID:NA|PIT:31.421	FAT:9.622|ADR:10.361|LUN:NA|HTH:10.814|SPL:11.841|MUS:10.989|LIV:10.716|KID:10.967|PIT:10.204	FALSE	TRUE
ERG	cluster_B	ERG 20517297 ChIP-Seq VCAP Human	3/853	0.00237824	0.099622	16.891	102.044	SOCS3;CCL7;WNT3A	top9	FALSE	ERG	FAT:61.438|ADR:11.512|LUN:61.424|HTH:NA|SPL:71.271|MUS:NA|LIV:NA|KID:NA|PIT:NA	FAT:7.759|ADR:7.754|LUN:NA|HTH:7.722|SPL:7.695|MUS:7.604|LIV:7.832|KID:7.906|PIT:7.64	TRUE	FALSE
HTT	cluster_B	HTT 18923047 ChIP-ChIP STHdh Human	2/304	0.00459804	0.170205	26.081	140.37	WNT3A;SOX11	top10	FALSE	HTT	FAT:68.165|ADR:82.118|LUN:111.136|HTH:60.484|SPL:116.761|MUS:71.641|LIV:45.125|KID:NA|PIT:102.018	FAT:8.485|ADR:8.479|LUN:NA|HTH:8.493|SPL:8.769|MUS:8.245|LIV:8.619|KID:8.932|PIT:8.205	TRUE	TRUE
RNF2	cluster_B	RNF2 27304074 Chip-Seq ESCs Mouse	3/1205	0.00635574	0.170205	11.725	59.309	SOCS3;WNT3A;SOX11	top11	FALSE	RNF2	FAT:13.207|ADR:NA|LUN:NA|HTH:NA|SPL:10.627|MUS:NA|LIV:NA|KID:NA|PIT:10.029	FAT:8.731|ADR:8.541|LUN:NA|HTH:8.114|SPL:8.265|MUS:8.239|LIV:8.294|KID:8.305|PIT:8.166	FALSE	TRUE
TCF4	cluster_B	TCF4 18268006 ChIP-ChIP LS174T Human	2/372	0.00681121	0.170205	21.214	105.841	ELOVL1;SOX11	top12	FALSE	TCF4	FAT:174.247|ADR:84.256|LUN:155.473|HTH:55.951|SPL:79.199|MUS:37.905|LIV:10.56|KID:NA|PIT:71.782	FAT:12.504|ADR:13.742|LUN:NA|HTH:13.18|SPL:13.296|MUS:12.831|LIV:11.435|KID:12.227|PIT:13.745	TRUE	TRUE
WT1	cluster_B	WT1 20215353 ChIP-ChIP NEPHRON PROGENITOR Mouse	3/1307	0.00798391	0.170205	10.749	51.921	SOCS3;DOCK4;SOX11	top13	FALSE	WT1	FAT:47.483|ADR:NA|LUN:NA|HTH:NA|SPL:36.952|MUS:NA|LIV:NA|KID:NA|PIT:NA	FAT:9.827|ADR:8.801|LUN:NA|HTH:7.941|SPL:10.319|MUS:7.771|LIV:8.389|KID:10.239|PIT:7.631	FALSE	TRUE
FOXA1	cluster_B	FOXA1 27197147 Chip-Seq ENDOMETRIOID-ADENOCARCINOMA Human	2/462	0.0103536	0.170205	16.985	77.63	KRT23;SOX11	top14	FALSE	FOXA1	FAT:NA|ADR:NA|LUN:10.206|HTH:NA|SPL:NA|MUS:NA|LIV:26.34|KID:NA|PIT:NA	FAT:8.405|ADR:8.473|LUN:NA|HTH:8.791|SPL:8.254|MUS:8.767|LIV:10.482|KID:8.133|PIT:7.865	FALSE	TRUE
STAT3	cluster_B	STAT3 22323479 ChIP-Seq MACROPHAGE Mouse	1/32	0.0111479	0.170205	107.323	482.576	SOCS3	top15	TRUE	STAT3	FAT:340.576|ADR:211.046|LUN:379.986|HTH:84.265|SPL:245.921|MUS:202.483|LIV:253.363|KID:NA|PIT:215.108	FAT:11.883|ADR:11.373|LUN:NA|HTH:10.396|SPL:11.569|MUS:11.368|LIV:11.861|KID:11.161|PIT:11.776	TRUE	TRUE
TAL1	cluster_B	TAL1 21186366 ChIP-Seq BM-HSCs Mouse	3/1477	0.0112227	0.170205	9.423	42.307	DOCK4;WNT3A;SOX11	top16	FALSE	TAL1	FAT:24.56|ADR:NA|LUN:46.158|HTH:NA|SPL:25.843|MUS:NA|LIV:NA|KID:NA|PIT:NA	FAT:8.414|ADR:8.177|LUN:NA|HTH:8.381|SPL:11.974|MUS:8.123|LIV:7.933|KID:7.989|PIT:7.679	FALSE	TRUE
STAT5B	cluster_B	STAT5B 24692510 ChIP-Seq Epithelium Mouse Mammary	2/484	0.0113223	0.170205	16.192	72.555	SOCS3;ELOVL1	top17	FALSE	STAT5B	FAT:123.721|ADR:150.876|LUN:125.49|HTH:101.351|SPL:160.535|MUS:116.729|LIV:45.168|KID:NA|PIT:163.78	FAT:7.686|ADR:7.604|LUN:NA|HTH:7.566|SPL:7.503|MUS:7.482|LIV:7.535|KID:7.652|PIT:7.525	TRUE	FALSE
FLI1	cluster_B	FLI1 21867929 ChIP-Seq TH2 Mouse	3/1496	0.011627	0.170205	9.293	41.397	SOCS3;DOCK4;SOX11	top18	FALSE	FLI1	FAT:50.55|ADR:NA|LUN:69.071|HTH:10.259|SPL:154.592|MUS:NA|LIV:NA|KID:NA|PIT:NA	FAT:8.196|ADR:8.497|LUN:NA|HTH:7.802|SPL:9.203|MUS:8.126|LIV:8.048|KID:7.835|PIT:7.668	TRUE	TRUE
IRF8	cluster_B	IRF8 27001747 Chip-Seq BMDM Mouse	3/1500	0.0117132	0.170205	9.267	41.209	SOCS3;CCL7;WNT3A	top19	FALSE	IRF8	FAT:28.798|ADR:NA|LUN:33.806|HTH:NA|SPL:188.876|MUS:NA|LIV:14.485|KID:NA|PIT:NA	FAT:9.136|ADR:9.34|LUN:NA|HTH:8.561|SPL:11.754|MUS:8.673|LIV:9.285|KID:9.153|PIT:8.493	TRUE	TRUE
MNX1	cluster_B	MNX1 26342078 ChIP-Seq MIN6-4N Mouse	3/1533	0.0124394	0.170205	9.05	39.704	SOCS3;WNT3A;SOX11	top20	FALSE	MNX1	FAT:NA|ADR:NA|LUN:NA|HTH:NA|SPL:NA|MUS:NA|LIV:NA|KID:NA|PIT:NA	FAT:8.093|ADR:7.678|LUN:NA|HTH:7.612|SPL:7.744|MUS:7.82|LIV:8.002|KID:7.722|PIT:7.751	FALSE	TRUE
SMC4	cluster_B	SMC4 20622854 ChIP-Seq HELA Human	3/1544	0.0126873	0.170205	8.981	39.219	SOCS3;DOCK4;KRT23	top21	FALSE	SMC4	FAT:21.015|ADR:23.652|LUN:46.797|HTH:NA|SPL:59.446|MUS:10.959|LIV:16.665|KID:NA|PIT:28.16	FAT:8.156|ADR:8.387|LUN:NA|HTH:7.859|SPL:8.967|MUS:7.819|LIV:7.952|KID:7.982|PIT:8.114	TRUE	TRUE
PPARA	cluster_B	PPARA 22158963 ChIP-Seq LIVER Mouse	3/1552	0.0128695	0.170205	8.93	38.873	SOCS3;DOCK4;KRT23	top22	TRUE	PPARA	FAT:30.052|ADR:36.633|LUN:20.511|HTH:18.688|SPL:20.631|MUS:57.029|LIV:110.083|KID:NA|PIT:19.972	FAT:7.933|ADR:8.027|LUN:NA|HTH:7.578|SPL:7.47|MUS:8.145|LIV:9.407|KID:8.48|PIT:7.538	TRUE	TRUE
POU5F1	cluster_B	POU5F1 18347094 ChIP-ChIP MESCs Mouse	3/1555	0.0129382	0.170205	8.912	38.744	SOCS3;WNT3A;SOX11	top23	FALSE	POU5F1	FAT:NA|ADR:NA|LUN:NA|HTH:NA|SPL:NA|MUS:NA|LIV:NA|KID:NA|PIT:NA	FAT:8.022|ADR:7.925|LUN:NA|HTH:7.917|SPL:8.231|MUS:8.23|LIV:8.082|KID:7.875|PIT:8.217	FALSE	TRUE
CJUN	cluster_B	CJUN 26792858 Chip-Seq BT549 Human	3/1564	0.0131457	0.170205	8.856	38.361	SOCS3;WNT3A;SOX11	top24	FALSE	JUN	FAT:741.753|ADR:134.486|LUN:475.269|HTH:104.639|SPL:93.818|MUS:132.973|LIV:235.473|KID:NA|PIT:193.036	FAT:9.691|ADR:11.441|LUN:NA|HTH:9.247|SPL:8.84|MUS:10.016|LIV:8.916|KID:9.349|PIT:8.521	TRUE	TRUE
DPY	cluster_B	DPY 21335234 ChIP-Seq ESCs Mouse	3/1575	0.013402	0.170205	8.789	37.9	DOCK4;WNT3A;SOX11	top25	FALSE	DPY30	FAT:22.806|ADR:36.092|LUN:22.841|HTH:31.953|SPL:25.659|MUS:22.888|LIV:17.795|KID:NA|PIT:29.147	FAT:12.059|ADR:11.947|LUN:NA|HTH:11.613|SPL:11.908|MUS:12.043|LIV:11.692|KID:11.946|PIT:11.815	FALSE	TRUE
FOXA1	cluster_B	FOXA1 27270436 Chip-Seq PROSTATE Human	3/1580	0.0135195	0.170205	8.758	37.693	SOCS3;CCL7;WNT3A	top26	FALSE	FOXA1	FAT:NA|ADR:NA|LUN:10.206|HTH:NA|SPL:NA|MUS:NA|LIV:26.34|KID:NA|PIT:NA	FAT:8.405|ADR:8.473|LUN:NA|HTH:8.791|SPL:8.254|MUS:8.767|LIV:10.482|KID:8.133|PIT:7.865	FALSE	TRUE
FOXA1	cluster_B	FOXA1 25329375 ChIP-Seq VCAP Human	3/1580	0.0135195	0.170205	8.758	37.693	SOCS3;CCL7;WNT3A	top27	FALSE	FOXA1	FAT:NA|ADR:NA|LUN:10.206|HTH:NA|SPL:NA|MUS:NA|LIV:26.34|KID:NA|PIT:NA	FAT:8.405|ADR:8.473|LUN:NA|HTH:8.791|SPL:8.254|MUS:8.767|LIV:10.482|KID:8.133|PIT:7.865	FALSE	TRUE
OLIG2	cluster_B	OLIG2 26023283 ChIP-Seq AINV15 Mouse	3/1588	0.0137087	0.170205	8.71	37.365	SOCS3;ELOVL1;DOCK4	top28	FALSE	OLIG2	FAT:NA|ADR:NA|LUN:NA|HTH:46.407|SPL:NA|MUS:NA|LIV:NA|KID:NA|PIT:NA	FAT:7.909|ADR:7.713|LUN:NA|HTH:8.148|SPL:7.661|MUS:7.631|LIV:7.886|KID:7.631|PIT:7.497	FALSE	TRUE
CBX2	cluster_B	CBX2 22325352 ChIP-Seq 293T-Rex Human	3/1595	0.0138756	0.170205	8.669	37.082	ELOVL1;WNT3A;SOX11	top29	FALSE	CBX2	FAT:NA|ADR:NA|LUN:NA|HTH:NA|SPL:NA|MUS:NA|LIV:NA|KID:NA|PIT:NA	FAT:7.952|ADR:8.096|LUN:NA|HTH:8.083|SPL:8.272|MUS:7.951|LIV:8.679|KID:8.569|PIT:8.147	FALSE	TRUE
RBPJ	cluster_B	RBPJ 21746931 ChIP-Seq IB4 Human	3/1598	0.0139475	0.170205	8.651	36.961	ELOVL1;WNT3A;SOX11	top30	FALSE	RBPJ	FAT:114.071|ADR:53.271|LUN:124.877|HTH:65.091|SPL:81.12|MUS:41.955|LIV:26.336|KID:NA|PIT:58.582	FAT:7.735|ADR:7.544|LUN:NA|HTH:7.631|SPL:7.7|MUS:7.671|LIV:7.581|KID:7.838|PIT:7.726	TRUE	FALSE
RUNX2	cluster_B	RUNX2 24764292 ChIP-Seq MC3T3 Mouse	3/1600	0.0139956	0.170205	8.639	36.881	SOCS3;CCL7;WNT3A	top31	FALSE	RUNX2	FAT:NA|ADR:NA|LUN:10.52|HTH:NA|SPL:11.345|MUS:NA|LIV:NA|KID:NA|PIT:NA	FAT:7.726|ADR:7.531|LUN:NA|HTH:7.676|SPL:7.522|MUS:7.608|LIV:7.615|KID:7.56|PIT:7.583	FALSE	FALSE
RING1B	cluster_B	RING1B 27294783 Chip-Seq ESCs Mouse	3/1651	0.0152549	0.171678	8.349	34.922	SOCS3;WNT3A;SOX11	top32	FALSE	RING1	FAT:43.579|ADR:45.316|LUN:48.936|HTH:41.288|SPL:50.382|MUS:21.29|LIV:30.618|KID:NA|PIT:108.14	FAT:9.837|ADR:11.22|LUN:NA|HTH:10.87|SPL:10.435|MUS:10.191|LIV:9.856|KID:10.3|PIT:10.647	TRUE	TRUE
SUZ12	cluster_B	SUZ12 27294783 Chip-Seq ESCs Mouse	3/1657	0.0154073	0.171678	8.316	34.701	DOCK4;WNT3A;SOX11	top33	FALSE	SUZ12	FAT:26.121|ADR:25.605|LUN:30.633|HTH:15.493|SPL:35.385|MUS:12.387|LIV:15.423|KID:NA|PIT:23.595	FAT:11.658|ADR:11.925|LUN:NA|HTH:11.585|SPL:12.494|MUS:11.249|LIV:11.418|KID:11.83|PIT:11.709	FALSE	TRUE
NUCKS1	cluster_B	NUCKS1 24931609 ChIP-Seq HEPATOCYTES Mouse	2/570	0.0154829	0.171678	13.68	57.017	SOCS3;DOCK4	top34	FALSE	NUCKS1	FAT:181.454|ADR:148.25|LUN:186.389|HTH:241.08|SPL:135.271|MUS:148.046|LIV:110.515|KID:NA|PIT:195.876	FAT:9.06|ADR:9.72|LUN:NA|HTH:10.243|SPL:10.236|MUS:9.829|LIV:9.76|KID:9.656|PIT:9.984	TRUE	TRUE
BRD4	cluster_B	BRD4 25478319 ChIP-Seq HGPS Human	3/1770	0.0184493	0.198725	7.736	30.888	SOCS3;ELOVL1;DOCK4	top35	FALSE	BRD4	FAT:98.721|ADR:90.342|LUN:121.249|HTH:47.05|SPL:129.54|MUS:109.833|LIV:66.166|KID:NA|PIT:100.541	FAT:11.671|ADR:12.102|LUN:NA|HTH:12.324|SPL:13.036|MUS:11.504|LIV:11.583|KID:11.637|PIT:12.177	TRUE	TRUE
SALL4	cluster_B	SALL4 18804426 ChIP-ChIP XEN Mouse	2/693	0.0224238	0.229725	11.173	42.432	SOCS3;ELOVL1	top36	FALSE	SALL4	FAT:NA|ADR:NA|LUN:NA|HTH:NA|SPL:NA|MUS:NA|LIV:NA|KID:NA|PIT:NA	FAT:7.763|ADR:7.658|LUN:NA|HTH:7.717|SPL:7.779|MUS:8.493|LIV:7.63|KID:7.763|PIT:7.721	FALSE	TRUE
ER	cluster_B	ER 23166858 ChIP-Seq MCF-7 Human	2/695	0.0225459	0.229725	11.14	42.245	DOCK4;SOX11	top37	FALSE	ESR1/ESR2	FAT:NA|ADR:NA|LUN:NA|HTH:NA|SPL:NA|MUS:NA|LIV:NA|KID:NA|PIT:NA	FAT:NA|ADR:NA|LUN:NA|HTH:NA|SPL:NA|MUS:NA|LIV:NA|KID:NA|PIT:NA	FALSE	FALSE
STAT5A	cluster_B	STAT5A 24692510 ChIP-Seq Epithelium Mouse Mammary	3/1977	0.0248823	0.241511	6.846	25.287	SOCS3;ELOVL1;DOCK4	top38	FALSE	STAT5A	FAT:118.824|ADR:98.509|LUN:66.159|HTH:16.288|SPL:83.851|MUS:34.006|LIV:11.643|KID:NA|PIT:33.373	FAT:10.391|ADR:9.222|LUN:NA|HTH:8.087|SPL:10.023|MUS:9.23|LIV:9.17|KID:9.132|PIT:9.046	TRUE	TRUE
TCFAP2C	cluster_B	TCFAP2C 20176728 ChIP-ChIP TROPHOBLAST STEM CELLS Mouse	3/1980	0.0249839	0.241511	6.835	25.216	ELOVL1;DOCK4;WNT3A	top39	FALSE	TFAP2C	FAT:NA|ADR:NA|LUN:NA|HTH:NA|SPL:NA|MUS:NA|LIV:NA|KID:NA|PIT:NA	FAT:8.027|ADR:7.675|LUN:NA|HTH:7.614|SPL:7.766|MUS:7.751|LIV:7.96|KID:7.931|PIT:7.792	FALSE	TRUE
STAT5A	cluster_B	STAT5A 28732065 ChIP-Seq J2E Mouse Blood	1/79	0.0273284	0.257566	42.553	153.185	SOCS3	top40	FALSE	STAT5A	FAT:118.824|ADR:98.509|LUN:66.159|HTH:16.288|SPL:83.851|MUS:34.006|LIV:11.643|KID:NA|PIT:33.373	FAT:10.391|ADR:9.222|LUN:NA|HTH:8.087|SPL:10.023|MUS:9.23|LIV:9.17|KID:9.132|PIT:9.046	TRUE	TRUE
KLF4	cluster_B	KLF4 18264089 ChIP-ChIP MESCs Mouse	1/85	0.0293775	0.257566	39.502	139.344	SOCS3	top43	FALSE	KLF4	FAT:222.672|ADR:32.645|LUN:183.608|HTH:11.975|SPL:80.849|MUS:23.755|LIV:NA|KID:NA|PIT:22.653	FAT:10.572|ADR:8.77|LUN:NA|HTH:8.333|SPL:8.737|MUS:9.745|LIV:8.333|KID:8.912|PIT:8.471	TRUE	TRUE
KLF5	cluster_B	KLF5 18264089 ChIP-ChIP MESCs Mouse	1/85	0.0293775	0.257566	39.502	139.344	SOCS3	top41	FALSE	KLF5	FAT:12.957|ADR:NA|LUN:36.252|HTH:NA|SPL:NA|MUS:19.664|LIV:NA|KID:NA|PIT:24.614	FAT:8.928|ADR:9.703|LUN:NA|HTH:9.288|SPL:9.191|MUS:9.834|LIV:8.179|KID:8.549|PIT:9.645	FALSE	TRUE
KLF2	cluster_B	KLF2 18264089 ChIP-ChIP MESCs Mouse	1/85	0.0293775	0.257566	39.502	139.344	SOCS3	top42	FALSE	KLF2	FAT:148.05|ADR:27.42|LUN:128.06|HTH:13.84|SPL:84.524|MUS:29.091|LIV:NA|KID:NA|PIT:35.748	FAT:11.469|ADR:10.913|LUN:NA|HTH:9.566|SPL:12.933|MUS:10.623|LIV:9.919|KID:10.156|PIT:9.432	TRUE	TRUE
SMARCA4	cluster_B	SMARCA4 20176728 ChIP-ChIP TSCs Mouse	2/830	0.0314387	0.269372	9.258	32.032	ELOVL1;DOCK4	top44	FALSE	SMARCA4	FAT:65.566|ADR:82.137|LUN:92.273|HTH:81.139|SPL:86.956|MUS:56.577|LIV:31.814|KID:NA|PIT:103.98	FAT:9.079|ADR:9.042|LUN:NA|HTH:9.104|SPL:9.6|MUS:9.105|LIV:9.021|KID:8.751|PIT:9.377	TRUE	TRUE
SMAD3	cluster_B	SMAD3 22036565 ChIP-Seq ESCs Mouse	2/844	0.0324321	0.271709	9.098	31.193	SOCS3;WNT3A	top45	FALSE	SMAD3	FAT:109.688|ADR:24.531|LUN:90.385|HTH:21.12|SPL:69.085|MUS:97.914|LIV:42.992|KID:NA|PIT:69.959	FAT:10.912|ADR:11.258|LUN:NA|HTH:10.262|SPL:11.127|MUS:12.152|LIV:10.247|KID:11.133|PIT:11.284	TRUE	TRUE
NANOG	cluster_B	NANOG 18358816 ChIP-ChIP MESCs Mouse	2/865	0.0339464	0.278213	8.867	29.996	SOCS3;KRT23	top46	FALSE	NANOG	FAT:NA|ADR:NA|LUN:NA|HTH:NA|SPL:NA|MUS:NA|LIV:NA|KID:NA|PIT:NA	FAT:7.604|ADR:7.544|LUN:NA|HTH:7.781|SPL:7.586|MUS:7.815|LIV:7.727|KID:7.692|PIT:7.534	FALSE	FALSE
TRIM28	cluster_B	TRIM28 19339689 ChIP-ChIP MESCs Mouse	3/2241	0.0347497	0.278737	5.95	19.99	SOCS3;DOCK4;SOX11	top47	FALSE	TRIM28	FAT:146.817|ADR:145.978|LUN:165.394|HTH:74.057|SPL:221.222|MUS:123.993|LIV:78.687|KID:NA|PIT:165.71	FAT:10.707|ADR:11.889|LUN:NA|HTH:11.855|SPL:12.317|MUS:11.002|LIV:11.144|KID:11.009|PIT:11.904	TRUE	TRUE
STAT5	cluster_B	STAT5 23275557 ChIP-Seq MAMMARY-EPITHELIUM Mouse	2/897	0.0363091	0.285178	8.535	28.301	SOCS3;ELOVL1	top48	FALSE	STAT5A/STAT5B	FAT:NA|ADR:NA|LUN:NA|HTH:NA|SPL:NA|MUS:NA|LIV:NA|KID:NA|PIT:NA	FAT:NA|ADR:NA|LUN:NA|HTH:NA|SPL:NA|MUS:NA|LIV:NA|KID:NA|PIT:NA	FALSE	FALSE
TP53	cluster_B	TP53 20018659 ChIP-ChIP R1E Mouse	2/909	0.037212	0.286305	8.417	27.702	WNT3A;SOX11	top49	FALSE	TRP53	FAT:NA|ADR:NA|LUN:NA|HTH:NA|SPL:NA|MUS:NA|LIV:NA|KID:NA|PIT:NA	FAT:9.395|ADR:10.582|LUN:NA|HTH:9.668|SPL:11.31|MUS:9.539|LIV:9.822|KID:9.745|PIT:10.217	FALSE	TRUE
CTNNB1	cluster_B	CTNNB1 24651522 ChIP-Seq LGR5+ INTESTINAL STEM Human	1/127	0.0436183	0.319501	26.279	82.313	KRT23	top50	FALSE		ADR:NA|FAT:NA|LIV:NA|LUN:NA	ADR:NA|FAT:NA|LIV:NA|LUN:NA	FALSE	FALSE
SOX9	cluster_B	SOX9 26525672 Chip-Seq Limbbuds Mouse	2/993	0.0437846	0.319501	7.67	23.995	KRT23;SOX11	top51	FALSE	SOX9	FAT:NA|ADR:NA|LUN:NA|HTH:55.137|SPL:NA|MUS:NA|LIV:NA|KID:NA|PIT:31.774	FAT:9.148|ADR:9.427|LUN:NA|HTH:12.742|SPL:8.915|MUS:10.244|LIV:10.53|KID:8.553|PIT:10.932	TRUE	TRUE
ZFP42	cluster_B	ZFP42 18358816 ChIP-ChIP MESCs Mouse	2/1013	0.045413	0.319501	7.51	23.221	SOCS3;DOCK4	top52	FALSE		ADR:NA|FAT:NA|LIV:NA|LUN:NA	ADR:NA|FAT:NA|LIV:NA|LUN:NA	FALSE	FALSE
SUZ12	cluster_B	SUZ12 18692474 ChIP-Seq MEFs Mouse	2/1019	0.0459061	0.319501	7.464	22.996	WNT3A;SOX11	top53	FALSE	SUZ12	FAT:26.121|ADR:25.605|LUN:30.633|HTH:15.493|SPL:35.385|MUS:12.387|LIV:15.423|KID:NA|PIT:23.595	FAT:11.658|ADR:11.925|LUN:NA|HTH:11.585|SPL:12.494|MUS:11.249|LIV:11.418|KID:11.83|PIT:11.709	FALSE	TRUE
STAT4	cluster_B	STAT4 19710469 ChIP-ChIP TH1 Mouse	2/1027	0.046567	0.319501	7.402	22.701	SOCS3;ELOVL1	top54	FALSE	STAT4	FAT:10.147|ADR:NA|LUN:18.215|HTH:10.086|SPL:29.284|MUS:NA|LIV:NA|KID:NA|PIT:33.689	FAT:8.516|ADR:8.154|LUN:NA|HTH:8.229|SPL:10.829|MUS:7.818|LIV:8.226|KID:7.95|PIT:8.257	FALSE	TRUE
RELB	cluster_B	RELB 30642670 ChIP-Seq CTB1 Human Placenta Inflammation	1/139	0.0476541	0.319501	23.979	72.988	SOCS3	top55	FALSE	RELB	FAT:20.923|ADR:14.725|LUN:30.603|HTH:NA|SPL:38.456|MUS:NA|LIV:NA|KID:NA|PIT:NA	FAT:8.982|ADR:9.611|LUN:NA|HTH:8.183|SPL:10.407|MUS:8.742|LIV:8.057|KID:8.125|PIT:7.945	FALSE	TRUE
JARID2	cluster_B	JARID2 20075857 ChIP-Seq MESCs Mouse	2/1055	0.0489095	0.319501	7.195	21.712	WNT3A;SOX11	top56	FALSE	JARID2	FAT:23.939|ADR:16.58|LUN:30.197|HTH:18.029|SPL:41.324|MUS:22.091|LIV:NA|KID:NA|PIT:19.715	FAT:7.759|ADR:7.657|LUN:NA|HTH:7.544|SPL:7.743|MUS:7.607|LIV:7.645|KID:7.693|PIT:7.596	FALSE	FALSE
RNF2	cluster_B	RNF2 18974828 ChIP-Seq MESCs Mouse	2/1066	0.0498422	0.319501	7.116	21.341	WNT3A;SOX11	top57	FALSE	RNF2	FAT:13.207|ADR:NA|LUN:NA|HTH:NA|SPL:10.627|MUS:NA|LIV:NA|KID:NA|PIT:10.029	FAT:8.731|ADR:8.541|LUN:NA|HTH:8.114|SPL:8.265|MUS:8.239|LIV:8.294|KID:8.305|PIT:8.166	FALSE	TRUE
EZH2	cluster_B	EZH2 18974828 ChIP-Seq MESCs Mouse	2/1066	0.0498422	0.319501	7.116	21.341	WNT3A;SOX11	top58	FALSE	EZH2	FAT:NA|ADR:NA|LUN:10.854|HTH:NA|SPL:17.294|MUS:NA|LIV:NA|KID:NA|PIT:NA	FAT:8.677|ADR:8.665|LUN:NA|HTH:8.642|SPL:10.198|MUS:8.543|LIV:8.721|KID:8.742|PIT:8.232	FALSE	TRUE

## Sheet: C
Gene expression changes in cluster C occur in the following tissues: ADR, FAT.
TF	cluster	Term	Overlap	P.value	Adjusted.P.value	Odds.Ratio	Combined.Score	Genes	TF_rank	nuclear_receptors	mapped_name	tissue_cpm_gtex	tissue_log2_microarray	pattern_tissue_colocalization_gtex	pattern_tissue_colocalization_microarray
SUZ12	cluster_C	SUZ12 27294783 Chip-Seq ESCs Mouse	7/1657	0.00054635	0.18016	6.481	48.684	CIITA;RASD1;KCNJ8;FAM78A;SLC40A1;FFAR2;BAHCC1	top1	FALSE	SUZ12	FAT:26.121|ADR:25.605|LUN:30.633|HTH:15.493|SPL:35.385|MUS:12.387|LIV:15.423|KID:NA|PIT:23.595	FAT:11.658|ADR:11.925|LUN:NA|HTH:11.585|SPL:12.494|MUS:11.249|LIV:11.418|KID:11.83|PIT:11.709	FALSE	TRUE
SUZ12	cluster_C	SUZ12 20075857 ChIP-Seq MESCs Mouse	10/3611	0.000681135	0.18016	5.054	36.854	RASL12;NUAK1;RASD1;KCNJ8;ADRB3;FAM78A;PLAU;CHST1;FFAR2;BAHCC1	top2	FALSE	SUZ12	FAT:26.121|ADR:25.605|LUN:30.633|HTH:15.493|SPL:35.385|MUS:12.387|LIV:15.423|KID:NA|PIT:23.595	FAT:11.658|ADR:11.925|LUN:NA|HTH:11.585|SPL:12.494|MUS:11.249|LIV:11.418|KID:11.83|PIT:11.709	FALSE	TRUE
PPARG	cluster_C	PPARG 20176806 ChIP-Seq 3T3-L1 Mouse	6/1369	0.00127084	0.224091	6.304	42.038	EGFL7;CIITA;ADRB3;PLAU;CHST1;BAHCC1	top3	TRUE	PPARG	FAT:126.709|ADR:NA|LUN:22.652|HTH:NA|SPL:13.807|MUS:NA|LIV:NA|KID:NA|PIT:NA	FAT:13.372|ADR:11.26|LUN:NA|HTH:7.99|SPL:9.888|MUS:9.47|LIV:9.801|KID:8.222|PIT:7.832	TRUE	TRUE
GATA1	cluster_C	GATA1 21571218 ChIP-Seq MEGAKARYOCYTES Human	7/2132	0.00244914	0.246318	4.902	29.469	KIAA1217;EGFL7;CIITA;ADRB3;ID1;SLC40A1;BAHCC1	top4	FALSE	GATA1	FAT:NA|ADR:NA|LUN:NA|HTH:NA|SPL:NA|MUS:NA|LIV:NA|KID:NA|PIT:NA	FAT:8.188|ADR:8.019|LUN:NA|HTH:7.797|SPL:9.354|MUS:7.96|LIV:7.701|KID:7.752|PIT:7.831	FALSE	TRUE
OLIG2	cluster_C	OLIG2 26023283 ChIP-Seq AINV15 Mouse	6/1588	0.00272852	0.246318	5.368	31.691	KBTBD13;NUAK1;RASD1;PLAU;ID1;BAHCC1	top5	FALSE	OLIG2	FAT:NA|ADR:NA|LUN:NA|HTH:46.407|SPL:NA|MUS:NA|LIV:NA|KID:NA|PIT:NA	FAT:7.909|ADR:7.713|LUN:NA|HTH:8.148|SPL:7.661|MUS:7.631|LIV:7.886|KID:7.631|PIT:7.497	FALSE	TRUE
GATA4	cluster_C	GATA4 25053715 ChIP-Seq YYC3 Human	6/1602	0.00285283	0.246318	5.317	31.153	KIAA1217;NUAK1;ID1;SLC40A1;FFAR2;BAHCC1	top6	FALSE	GATA4	FAT:NA|ADR:NA|LUN:NA|HTH:NA|SPL:NA|MUS:NA|LIV:31.882|KID:NA|PIT:NA	FAT:8.044|ADR:7.798|LUN:NA|HTH:7.719|SPL:7.616|MUS:8.099|LIV:7.885|KID:7.889|PIT:7.629	FALSE	TRUE
KDM2B	cluster_C	KDM2B 26808549 Chip-Seq DND41 Human	6/1657	0.00338352	0.246318	5.124	29.151	FAM78A;PLAU;ID1;CHST1;ZNF467;BAHCC1	top7	FALSE	KDM2B	FAT:24.795|ADR:18.857|LUN:36.24|HTH:19.149|SPL:54.757|MUS:12.678|LIV:18.981|KID:NA|PIT:27.482	FAT:9.521|ADR:9.548|LUN:NA|HTH:9.883|SPL:10.717|MUS:9.461|LIV:9.297|KID:9.557|PIT:9.449	TRUE	TRUE
ELK3	cluster_C	ELK3 25401928 ChIP-Seq HUVEC Human	6/1689	0.00372503	0.246318	5.018	28.064	EGFL7;PLAU;ID1;SLC40A1;CHST1;BAHCC1	top8	FALSE	ELK3	FAT:83.186|ADR:27.237|LUN:53.614|HTH:11.362|SPL:53.823|MUS:NA|LIV:NA|KID:NA|PIT:18.901	FAT:10.992|ADR:11.359|LUN:NA|HTH:9.545|SPL:11.511|MUS:10.695|LIV:10.352|KID:10.64|PIT:11.121	TRUE	TRUE
SMAD4	cluster_C	SMAD4 21741376 ChIP-Seq HESCs Human	6/1862	0.0060445	0.323841	4.507	23.026	EGFL7;NUAK1;RASL11B;ID1;CHST1;BAHCC1	top9	FALSE	SMAD4	FAT:71.637|ADR:57.013|LUN:79.538|HTH:33.008|SPL:69.169|MUS:71.587|LIV:42.363|KID:NA|PIT:76.606	FAT:12.695|ADR:12.959|LUN:NA|HTH:12.213|SPL:12.963|MUS:12.913|LIV:12.309|KID:12.6|PIT:13.501	TRUE	TRUE
STAT1	cluster_C	STAT1 17558387 ChIP-Seq HELA Human	5/1349	0.00726088	0.323841	4.952	24.392	EGFL7;RASL11B;KCNJ8;ADRB3;SLC40A1	top10	FALSE	STAT1	FAT:84.043|ADR:95.991|LUN:125.711|HTH:76.771|SPL:149.642|MUS:41.223|LIV:53.084|KID:NA|PIT:79.141	FAT:11.866|ADR:11.862|LUN:NA|HTH:9.516|SPL:11.9|MUS:9.67|LIV:10.439|KID:9.961|PIT:9.913	TRUE	TRUE
NANOG	cluster_C	NANOG 18347094 ChIP-ChIP MESCs Mouse	5/1399	0.0084535	0.323841	4.762	22.73	RASL11B;KCNJ8;ADRB3;ID1;BAHCC1	top11	FALSE	NANOG	FAT:NA|ADR:NA|LUN:NA|HTH:NA|SPL:NA|MUS:NA|LIV:NA|KID:NA|PIT:NA	FAT:7.604|ADR:7.544|LUN:NA|HTH:7.781|SPL:7.586|MUS:7.815|LIV:7.727|KID:7.692|PIT:7.534	FALSE	FALSE
RUNX1	cluster_C	RUNX1 27457419 Chip-Seq LIVER Mouse	5/1475	0.0105229	0.323841	4.497	20.482	EGFL7;FAM78A;ID1;SLC40A1;CHST1	top12	FALSE	RUNX1	FAT:59.245|ADR:14.442|LUN:91.415|HTH:NA|SPL:44.823|MUS:39.807|LIV:13.6|KID:NA|PIT:25.275	FAT:7.769|ADR:7.977|LUN:NA|HTH:7.835|SPL:8.629|MUS:7.763|LIV:7.794|KID:7.745|PIT:7.75	TRUE	TRUE
ZFX	cluster_C	ZFX 18555785 Chip-Seq ESCs Mouse	5/1485	0.0108194	0.323841	4.465	20.208	EGFL7;FAM78A;ID1;SLC40A1;CHST1	top13	FALSE	ZFX	FAT:33.391|ADR:22.191|LUN:30.381|HTH:13.878|SPL:36.307|MUS:29.547|LIV:18.069|KID:NA|PIT:27.387	FAT:10.641|ADR:10.895|LUN:NA|HTH:10.194|SPL:11.107|MUS:10.581|LIV:10.335|KID:10.373|PIT:10.798	FALSE	TRUE
SOX2	cluster_C	SOX2 18555785 Chip-Seq ESCs Mouse	5/1508	0.0115234	0.323841	4.391	19.598	EGFL7;FAM78A;ID1;SLC40A1;CHST1	top14	FALSE	SOX2	FAT:NA|ADR:NA|LUN:NA|HTH:64.448|SPL:NA|MUS:NA|LIV:NA|KID:NA|PIT:25.59	FAT:8.007|ADR:7.668|LUN:NA|HTH:9.112|SPL:7.868|MUS:7.815|LIV:8.148|KID:7.91|PIT:8.309	TRUE	TRUE
E2F1	cluster_C	E2F1 18555785 Chip-Seq ESCs Mouse	5/1528	0.0121611	0.323841	4.328	19.086	EGFL7;FAM78A;ID1;SLC40A1;CHST1	top15	FALSE	E2F1	FAT:NA|ADR:NA|LUN:NA|HTH:NA|SPL:NA|MUS:NA|LIV:NA|KID:NA|PIT:NA	FAT:9.432|ADR:9.6|LUN:NA|HTH:8.879|SPL:11.256|MUS:8.768|LIV:9.235|KID:9.057|PIT:9.51	FALSE	TRUE
PU	cluster_C	PU 27001747 Chip-Seq BMDM Mouse	5/1573	0.0136852	0.323841	4.194	17.998	CIITA;NUAK1;RASD1;PLAU;BAHCC1	top16	FALSE	SPI1	FAT:28.676|ADR:15.336|LUN:89.426|HTH:NA|SPL:150.697|MUS:NA|LIV:NA|KID:NA|PIT:NA	FAT:8.215|ADR:7.821|LUN:NA|HTH:7.698|SPL:9.182|MUS:7.894|LIV:8.12|KID:7.953|PIT:7.707	TRUE	TRUE
WT1	cluster_C	WT1 25993318 ChIP-Seq PODOCYTE Human	7/2909	0.0138366	0.323841	3.433	14.695	CIITA;RASD1;RASL11B;KCNJ8;ID1;CHST1;BAHCC1	top17	FALSE	WT1	FAT:47.483|ADR:NA|LUN:NA|HTH:NA|SPL:36.952|MUS:NA|LIV:NA|KID:NA|PIT:NA	FAT:9.827|ADR:8.801|LUN:NA|HTH:7.941|SPL:10.319|MUS:7.771|LIV:8.389|KID:10.239|PIT:7.631	FALSE	TRUE
CBP	cluster_C	CBP 21632823 ChIP-Seq H3396 Human	5/1593	0.0144032	0.323841	4.137	17.54	KIAA1217;NUAK1;KCNJ8;PLAU;CHST1	top18	FALSE	CREBBP	FAT:93.795|ADR:61.32|LUN:100.107|HTH:42.244|SPL:120.701|MUS:89.134|LIV:44.973|KID:NA|PIT:89.282	FAT:7.873|ADR:7.848|LUN:NA|HTH:7.966|SPL:7.965|MUS:8.048|LIV:7.981|KID:7.907|PIT:7.746	TRUE	TRUE
MYCN	cluster_C	MYCN 27167114 Chip-Seq NEUROBLASTOMA Human	5/1594	0.0144398	0.323841	4.134	17.518	KBTBD13;RASL12;NUAK1;CHST1;BAHCC1	top19	FALSE	MYCN	FAT:NA|ADR:NA|LUN:NA|HTH:NA|SPL:NA|MUS:NA|LIV:NA|KID:NA|PIT:NA	FAT:7.601|ADR:7.639|LUN:NA|HTH:7.484|SPL:7.449|MUS:7.403|LIV:7.505|KID:7.536|PIT:7.535	FALSE	FALSE
BRD4	cluster_C	BRD4 27068464 Chip-Seq AML-cells Mouse	5/1597	0.0145499	0.323841	4.125	17.451	NUAK1;FAM78A;PLAU;FFAR2;BAHCC1	top20	FALSE	BRD4	FAT:98.721|ADR:90.342|LUN:121.249|HTH:47.05|SPL:129.54|MUS:109.833|LIV:66.166|KID:NA|PIT:100.541	FAT:11.671|ADR:12.102|LUN:NA|HTH:12.324|SPL:13.036|MUS:11.504|LIV:11.583|KID:11.637|PIT:12.177	TRUE	TRUE
TFAP2C	cluster_C	TFAP2C 20629094 ChIP-Seq MCF-7 Human	4/1034	0.0147701	0.323841	4.906	20.681	KIAA1217;RASL12;NUAK1;PLAU	top21	FALSE	TFAP2C	FAT:NA|ADR:NA|LUN:NA|HTH:NA|SPL:NA|MUS:NA|LIV:NA|KID:NA|PIT:NA	FAT:8.027|ADR:7.675|LUN:NA|HTH:7.614|SPL:7.766|MUS:7.751|LIV:7.96|KID:7.931|PIT:7.792	FALSE	TRUE
CREB1	cluster_C	CREB1 26743006 Chip-Seq LNCaP-abl Human	5/1626	0.0156442	0.323841	4.045	16.818	KBTBD13;KIAA1217;RASD1;FAM78A;BAHCC1	top22	FALSE	CREB1	FAT:37.273|ADR:20.423|LUN:38.816|HTH:19.525|SPL:42.107|MUS:11.625|LIV:11.903|KID:NA|PIT:27.008	FAT:7.94|ADR:8.493|LUN:NA|HTH:9.068|SPL:8.526|MUS:8.394|LIV:8.052|KID:8.178|PIT:8.375	FALSE	TRUE
MYC	cluster_C	MYC 22102868 ChIP-Seq BL Human	3/569	0.0158077	0.323841	6.432	26.674	CIITA;FAM78A;ID1	top23	FALSE	MYC	FAT:326.368|ADR:58.718|LUN:65.632|HTH:NA|SPL:92.701|MUS:36.232|LIV:27.153|KID:NA|PIT:18.176	FAT:8.081|ADR:8.39|LUN:NA|HTH:7.986|SPL:8.469|MUS:7.831|LIV:8.247|KID:8.038|PIT:7.869	TRUE	TRUE
RING1B	cluster_C	RING1B 27294783 Chip-Seq NPCs Mouse	5/1632	0.0158775	0.323841	4.029	16.691	NUAK1;KCNJ8;ID1;SLC40A1;BAHCC1	top24	FALSE	RING1	FAT:43.579|ADR:45.316|LUN:48.936|HTH:41.288|SPL:50.382|MUS:21.29|LIV:30.618|KID:NA|PIT:108.14	FAT:9.837|ADR:11.22|LUN:NA|HTH:10.87|SPL:10.435|MUS:10.191|LIV:9.856|KID:10.3|PIT:10.647	TRUE	TRUE
NANOG	cluster_C	NANOG 16153702 ChIP-ChIP HESCs Human	4/1057	0.0159065	0.323841	4.793	19.85	KIAA1217;RASL11B;ID1;SLC40A1	top25	FALSE	NANOG	FAT:NA|ADR:NA|LUN:NA|HTH:NA|SPL:NA|MUS:NA|LIV:NA|KID:NA|PIT:NA	FAT:7.604|ADR:7.544|LUN:NA|HTH:7.781|SPL:7.586|MUS:7.815|LIV:7.727|KID:7.692|PIT:7.534	FALSE	FALSE
SA1	cluster_C	SA1 27219007 Chip-Seq Bcells Human	5/1633	0.0159166	0.323841	4.026	16.67	KBTBD13;CIITA;NUAK1;PLAU;CHST1	top26	FALSE	STAG1	FAT:47.711|ADR:30.672|LUN:40.663|HTH:20.124|SPL:34.931|MUS:33.721|LIV:16.155|KID:NA|PIT:28.303	FAT:10.516|ADR:10.148|LUN:NA|HTH:9.63|SPL:9.751|MUS:9.815|LIV:9.527|KID:9.862|PIT:9.823	FALSE	TRUE
GATA2	cluster_C	GATA2 21666600 ChIP-Seq HMVEC Human	3/588	0.0172502	0.3313	6.217	25.239	KIAA1217;EGFL7;PLAU	top27	FALSE	GATA2	FAT:27.196|ADR:NA|LUN:85.161|HTH:NA|SPL:28.334|MUS:NA|LIV:NA|KID:NA|PIT:24.818	FAT:9.421|ADR:11.858|LUN:NA|HTH:9.086|SPL:9.99|MUS:9.922|LIV:8.806|KID:10.79|PIT:12.158	TRUE	TRUE
KDM2B	cluster_C	KDM2B 26808549 Chip-Seq K562 Human	5/1673	0.0175357	0.3313	3.921	15.855	EGFL7;PLAU;ID1;ZNF467;BAHCC1	top28	FALSE	KDM2B	FAT:24.795|ADR:18.857|LUN:36.24|HTH:19.149|SPL:54.757|MUS:12.678|LIV:18.981|KID:NA|PIT:27.482	FAT:9.521|ADR:9.548|LUN:NA|HTH:9.883|SPL:10.717|MUS:9.461|LIV:9.297|KID:9.557|PIT:9.449	TRUE	TRUE
P300	cluster_C	P300 27058665 Chip-Seq ZR-75-30cells Human	5/1689	0.0182138	0.332244	3.88	15.543	KIAA1217;CIITA;NUAK1;PLAU;CHST1	top29	FALSE	EP300	FAT:87.236|ADR:84.403|LUN:99.516|HTH:39.487|SPL:102.572|MUS:66.52|LIV:39.612|KID:NA|PIT:102.474	FAT:10.178|ADR:10.392|LUN:NA|HTH:10.485|SPL:10.701|MUS:10.413|LIV:9.864|KID:10.087|PIT:10.444	TRUE	TRUE
TBX4	cluster_C	TBX4 33478486 ChIP-Seq IMR90 Human Lung	2/226	0.0191563	0.337789	10.377	41.041	EGFL7;FFAR4	top30	FALSE		ADR:NA|FAT:NA	ADR:NA|FAT:NA	FALSE	FALSE
SMAD3	cluster_C	SMAD3 30307970 ChIP-Seq HCASMC Human CoronaryArtery	5/1759	0.0213902	0.360709	3.711	14.269	KBTBD13;RASL12;NUAK1;FAM78A;BAHCC1	top31	FALSE	SMAD3	FAT:109.688|ADR:24.531|LUN:90.385|HTH:21.12|SPL:69.085|MUS:97.914|LIV:42.992|KID:NA|PIT:69.959	FAT:10.912|ADR:11.258|LUN:NA|HTH:10.262|SPL:11.127|MUS:12.152|LIV:10.247|KID:11.133|PIT:11.284	TRUE	TRUE
AF4	cluster_C	AF4 28076791 ChIP-Seq SEM Human Blood Leukemia	3/652	0.022645	0.360709	5.585	21.155	CIITA;RASD1;FAM78A	top32	FALSE	AFF1	FAT:155.152|ADR:99.188|LUN:136.152|HTH:24.008|SPL:94.203|MUS:177.903|LIV:48.158|KID:NA|PIT:90.446	FAT:11.509|ADR:10.423|LUN:NA|HTH:9.114|SPL:11.091|MUS:10.862|LIV:10.473|KID:10.939|PIT:10.389	TRUE	TRUE
VDR	cluster_C	VDR 24787735 ChIP-Seq THP-1 Human	3/663	0.0236561	0.360709	5.489	20.551	PLAU;CHST1;FFAR2	top33	TRUE	VDR	FAT:NA|ADR:36.074|LUN:22.797|HTH:NA|SPL:NA|MUS:NA|LIV:NA|KID:NA|PIT:38.636	FAT:8.065|ADR:9.311|LUN:NA|HTH:7.969|SPL:8.289|MUS:8.253|LIV:8.305|KID:12.613|PIT:9.605	FALSE	TRUE
TP53	cluster_C	TP53 18474530 ChIP-ChIP U2OS Human	3/687	0.0259478	0.360709	5.29	19.316	NUAK1;RASL11B;KCNJ8	top34	FALSE	TRP53	FAT:NA|ADR:NA|LUN:NA|HTH:NA|SPL:NA|MUS:NA|LIV:NA|KID:NA|PIT:NA	FAT:9.395|ADR:10.582|LUN:NA|HTH:9.668|SPL:11.31|MUS:9.539|LIV:9.822|KID:9.745|PIT:10.217	FALSE	TRUE
SALL4	cluster_C	SALL4 18804426 ChIP-ChIP XEN Mouse	3/693	0.0265391	0.360709	5.242	19.024	EGFL7;NUAK1;ADRB3	top35	FALSE	SALL4	FAT:NA|ADR:NA|LUN:NA|HTH:NA|SPL:NA|MUS:NA|LIV:NA|KID:NA|PIT:NA	FAT:7.763|ADR:7.658|LUN:NA|HTH:7.717|SPL:7.779|MUS:8.493|LIV:7.63|KID:7.763|PIT:7.721	FALSE	TRUE
FOSL1	cluster_C	FOSL1 28411283 ChIP-Seq MDA231-LM2-4175 Human BreastCancer	4/1238	0.0268297	0.360709	4.051	14.658	KIAA1217;NUAK1;PLAU;ID1	top36	FALSE	FOSL1	FAT:46.566|ADR:NA|LUN:15.266|HTH:NA|SPL:NA|MUS:NA|LIV:NA|KID:NA|PIT:NA	FAT:8.108|ADR:7.772|LUN:NA|HTH:7.757|SPL:7.871|MUS:8.057|LIV:7.882|KID:7.77|PIT:7.997	FALSE	TRUE
EOMES	cluster_C	EOMES 20176728 ChIP-ChIP TSCs Mouse	4/1243	0.0271832	0.360709	4.034	14.542	NUAK1;ID1;SLC40A1;CHST1	top37	FALSE	EOMES	FAT:NA|ADR:NA|LUN:NA|HTH:NA|SPL:22.934|MUS:NA|LIV:NA|KID:NA|PIT:NA	FAT:7.966|ADR:7.631|LUN:NA|HTH:7.596|SPL:8.409|MUS:7.688|LIV:7.868|KID:7.827|PIT:7.61	FALSE	TRUE
HAND2	cluster_C	HAND2 30127528 ChIP-Seq KELLY Human Brain Neuroblastoma	7/3383	0.0301729	0.360709	2.869	10.044	KIAA1217;NUAK1;RASD1;KCNJ8;ID1;FFAR2;BAHCC1	top38	FALSE	HAND2	FAT:20.858|ADR:13.691|LUN:NA|HTH:NA|SPL:NA|MUS:NA|LIV:10.83|KID:NA|PIT:NA	FAT:7.498|ADR:8.663|LUN:NA|HTH:7.634|SPL:7.56|MUS:7.641|LIV:7.822|KID:7.513|PIT:7.503	FALSE	TRUE
NR3C1	cluster_C	NR3C1 23031785 ChIP-Seq PC12 Mouse	3/730	0.030348	0.360709	4.966	17.356	PLAU;ID1;CHST1	top39	TRUE	NR3C1	FAT:90.796|ADR:22.305|LUN:74.366|HTH:32.889|SPL:46.401|MUS:75.227|LIV:37.687|KID:NA|PIT:64.784	FAT:7.997|ADR:7.926|LUN:NA|HTH:7.918|SPL:7.842|MUS:7.992|LIV:8.027|KID:7.9|PIT:7.872	TRUE	TRUE
EP300	cluster_C	EP300 20729851 ChIP-Seq FORBRAIN MIDBRAIN LIMB HEART Mouse	4/1313	0.0324369	0.360709	3.804	13.041	EGFL7;RASL11B;ID1;BAHCC1	top40	FALSE	EP300	FAT:87.236|ADR:84.403|LUN:99.516|HTH:39.487|SPL:102.572|MUS:66.52|LIV:39.612|KID:NA|PIT:102.474	FAT:10.178|ADR:10.392|LUN:NA|HTH:10.485|SPL:10.701|MUS:10.413|LIV:9.864|KID:10.087|PIT:10.444	TRUE	TRUE
LMO2	cluster_C	LMO2 20887958 ChIP-Seq HPC-7 Mouse	4/1317	0.0327544	0.360709	3.791	12.962	EGFL7;KCNJ8;FFAR2;BAHCC1	top41	FALSE	LMO2	FAT:24.274|ADR:12.937|LUN:41.635|HTH:31.271|SPL:41.595|MUS:20.416|LIV:NA|KID:NA|PIT:29.506	FAT:11.063|ADR:11.887|LUN:NA|HTH:11.308|SPL:14.235|MUS:10.811|LIV:10.227|KID:10.9|PIT:11.715	FALSE	TRUE
STAT5A	cluster_C	STAT5A 24692510 ChIP-Seq Epithelium Mouse Mammary	5/1977	0.033614	0.360709	3.262	11.066	KBTBD13;RASL12;KCNJ8;CHST1;BAHCC1	top42	FALSE	STAT5A	FAT:118.824|ADR:98.509|LUN:66.159|HTH:16.288|SPL:83.851|MUS:34.006|LIV:11.643|KID:NA|PIT:33.373	FAT:10.391|ADR:9.222|LUN:NA|HTH:8.087|SPL:10.023|MUS:9.23|LIV:9.17|KID:9.132|PIT:9.046	TRUE	TRUE
CDH4	cluster_C	CDH4 35650610 ChIP-Seq mESC Mouse Stem Autism	3/774	0.0352412	0.360709	4.672	15.629	SLC40A1;FFAR4;FFAR2	top43	FALSE	CDH4	FAT:NA|ADR:NA|LUN:NA|HTH:24.167|SPL:17.917|MUS:NA|LIV:NA|KID:NA|PIT:NA	FAT:7.926|ADR:9.626|LUN:NA|HTH:11.014|SPL:9.285|MUS:10.591|LIV:8.629|KID:8.521|PIT:9.22	FALSE	TRUE
CEBPD	cluster_C	CEBPD 21427703 ChIP-Seq 3T3-L1 Mouse	4/1349	0.0353622	0.360709	3.695	12.349	EGFL7;RASL11B;ID1;BAHCC1	top44	FALSE	CEBPD	FAT:327.483|ADR:88.103|LUN:221.259|HTH:36.354|SPL:155.305|MUS:95.252|LIV:140.356|KID:NA|PIT:180.382	FAT:7.564|ADR:7.582|LUN:NA|HTH:7.464|SPL:7.631|MUS:7.724|LIV:7.564|KID:7.568|PIT:7.723	TRUE	FALSE
E2F1	cluster_C	E2F1 17053090 ChIP-ChIP MCF-7 Human	4/1380	0.0380042	0.360709	3.606	11.791	CIITA;RASD1;KCNJ8;CHST1	top45	FALSE	E2F1	FAT:NA|ADR:NA|LUN:NA|HTH:NA|SPL:NA|MUS:NA|LIV:NA|KID:NA|PIT:NA	FAT:9.432|ADR:9.6|LUN:NA|HTH:8.879|SPL:11.256|MUS:8.768|LIV:9.235|KID:9.057|PIT:9.51	FALSE	TRUE
SREBP2	cluster_C	SREBP2 21459322 ChIP-Seq LIVER Mouse	3/801	0.0384386	0.360709	4.507	14.688	RASL12;CIITA;BAHCC1	top46	FALSE		ADR:NA|FAT:NA	ADR:NA|FAT:NA	FALSE	FALSE
SMARCA4	cluster_C	SMARCA4 20176728 ChIP-ChIP TSCs Mouse	3/830	0.0420367	0.360709	4.343	13.763	PLAU;ID1;SLC40A1	top47	FALSE	SMARCA4	FAT:65.566|ADR:82.137|LUN:92.273|HTH:81.139|SPL:86.956|MUS:56.577|LIV:31.814|KID:NA|PIT:103.98	FAT:9.079|ADR:9.042|LUN:NA|HTH:9.104|SPL:9.6|MUS:9.105|LIV:9.021|KID:8.751|PIT:9.377	TRUE	TRUE
RCOR3	cluster_C	RCOR3 21632747 ChIP-Seq MESCs Mouse	5/2142	0.0453887	0.360709	2.982	9.222	CIITA;ADRB3;PLAU;ID1;CHST1	top48	FALSE	RCOR3	FAT:38.167|ADR:39.321|LUN:48.018|HTH:32.663|SPL:59.228|MUS:71.926|LIV:24.959|KID:NA|PIT:56.883	FAT:8.203|ADR:8.122|LUN:NA|HTH:8.214|SPL:8.106|MUS:8.954|LIV:8.41|KID:8.511|PIT:8.122	TRUE	TRUE
BMI1	cluster_C	BMI1 23680149 ChIP-Seq NPCS Mouse	3/860	0.0459361	0.360709	4.184	12.889	KCNJ8;ID1;SLC40A1	top49	FALSE	BMI1	ADR:44.138|FAT:43.42|HTH:43.813|KID:NA|LIV:23.98|MUS:34.319|SPL:50.8|LUN:39.674	ADR:8.951|FAT:8.172|HTH:8.756|KID:8.347|LIV:8.061|MUS:8.618|SPL:8.334|LUN:NA	TRUE	TRUE
NFE2L2	cluster_C	NFE2L2 20460467 ChIP-Seq MEFs Mouse	3/870	0.0472756	0.360709	4.134	12.615	NUAK1;RASL11B;SLC40A1	top50	FALSE	NFE2L2	FAT:137.34|ADR:87.683|LUN:118.604|HTH:50.194|SPL:80.759|MUS:54.788|LIV:49.833|KID:NA|PIT:104.104	FAT:9.686|ADR:9.896|LUN:NA|HTH:8.347|SPL:9.167|MUS:9.394|LIV:9.659|KID:9.252|PIT:9.119	TRUE	TRUE
NRF2	cluster_C	NRF2 20460467 ChIP-Seq MEFs Mouse	3/870	0.0472756	0.360709	4.134	12.615	NUAK1;RASL11B;SLC40A1	top51	FALSE	NFE2L2	FAT:137.34|ADR:87.683|LUN:118.604|HTH:50.194|SPL:80.759|MUS:54.788|LIV:49.833|KID:NA|PIT:104.104	FAT:9.686|ADR:9.896|LUN:NA|HTH:8.347|SPL:9.167|MUS:9.394|LIV:9.659|KID:9.252|PIT:9.119	TRUE	TRUE
NANOG	cluster_C	NANOG 18692474 ChIP-Seq MESCs Mouse	5/2172	0.0477748	0.360709	2.936	8.929	RASL11B;KCNJ8;ADRB3;ID1;BAHCC1	top52	FALSE	NANOG	FAT:NA|ADR:NA|LUN:NA|HTH:NA|SPL:NA|MUS:NA|LIV:NA|KID:NA|PIT:NA	FAT:7.604|ADR:7.544|LUN:NA|HTH:7.781|SPL:7.586|MUS:7.815|LIV:7.727|KID:7.692|PIT:7.534	FALSE	FALSE
KLF4	cluster_C	KLF4 18555785 Chip-Seq ESCs Mouse	4/1486	0.0479077	0.360709	3.329	10.114	EGFL7;FAM78A;SLC40A1;CHST1	top53	FALSE	KLF4	FAT:222.672|ADR:32.645|LUN:183.608|HTH:11.975|SPL:80.849|MUS:23.755|LIV:NA|KID:NA|PIT:22.653	FAT:10.572|ADR:8.77|LUN:NA|HTH:8.333|SPL:8.737|MUS:9.745|LIV:8.333|KID:8.912|PIT:8.471	TRUE	TRUE
STAT3	cluster_C	STAT3 18555785 Chip-Seq ESCs Mouse	4/1495	0.0488109	0.360709	3.307	9.986	EGFL7;ID1;SLC40A1;CHST1	top54	TRUE	STAT3	FAT:340.576|ADR:211.046|LUN:379.986|HTH:84.265|SPL:245.921|MUS:202.483|LIV:253.363|KID:NA|PIT:215.108	FAT:11.883|ADR:11.373|LUN:NA|HTH:10.396|SPL:11.569|MUS:11.368|LIV:11.861|KID:11.161|PIT:11.776	TRUE	TRUE
ESRRB	cluster_C	ESRRB 18555785 Chip-Seq ESCs Mouse	4/1496	0.0489119	0.360709	3.305	9.972	EGFL7;FAM78A;SLC40A1;CHST1	top55	TRUE	ESRRB	FAT:NA|ADR:NA|LUN:NA|HTH:NA|SPL:NA|MUS:NA|LIV:NA|KID:NA|PIT:NA	FAT:8.248|ADR:7.986|LUN:NA|HTH:8.509|SPL:7.939|MUS:9.418|LIV:8.624|KID:11.303|PIT:8.089	FALSE	TRUE
TP63	cluster_C	TP63 23658742 ChIP-Seq EP156T Human	6/2937	0.0490376	0.360709	2.685	8.095	EGFL7;NUAK1;RASL11B;KCNJ8;SLC40A1;FFAR2	top56	FALSE	TRP63	FAT:NA|ADR:NA|LUN:NA|HTH:NA|SPL:NA|MUS:NA|LIV:NA|KID:NA|PIT:NA	FAT:8.814|ADR:8.268|LUN:NA|HTH:8.191|SPL:8.949|MUS:8.709|LIV:7.621|KID:7.967|PIT:8.117	FALSE	TRUE
P300	cluster_C	P300 18555785 Chip-Seq ESCs Mouse	4/1499	0.0492155	0.360709	3.297	9.93	EGFL7;FAM78A;SLC40A1;CHST1	top57	FALSE	EP300	FAT:87.236|ADR:84.403|LUN:99.516|HTH:39.487|SPL:102.572|MUS:66.52|LIV:39.612|KID:NA|PIT:102.474	FAT:10.178|ADR:10.392|LUN:NA|HTH:10.485|SPL:10.701|MUS:10.413|LIV:9.864|KID:10.087|PIT:10.444	TRUE	TRUE
EBF1	cluster_C	EBF1 22473956 ChIP-Seq BONE MARROW Mouse	4/1502	0.0495202	0.360709	3.29	9.888	EGFL7;FAM78A;SLC40A1;CHST1	top58	FALSE	EBF1	FAT:70.675|ADR:NA|LUN:15.444|HTH:NA|SPL:16.021|MUS:NA|LIV:NA|KID:NA|PIT:NA	FAT:9.798|ADR:9.314|LUN:NA|HTH:8.121|SPL:8.034|MUS:8.784|LIV:7.831|KID:8.254|PIT:8.052	TRUE	TRUE
EBF1	cluster_C	EBF1 22473956 ChIP-Seq LYMPHODE Mouse	4/1505	0.049826	0.360709	3.283	9.847	EGFL7;FAM78A;SLC40A1;CHST1	top59	FALSE	EBF1	FAT:70.675|ADR:NA|LUN:15.444|HTH:NA|SPL:16.021|MUS:NA|LIV:NA|KID:NA|PIT:NA	FAT:9.798|ADR:9.314|LUN:NA|HTH:8.121|SPL:8.034|MUS:8.784|LIV:7.831|KID:8.254|PIT:8.052	TRUE	TRUE

## Sheet: D
Gene expression changes in cluster D occur in the following tissues: ADR, FAT, HTH, KID, LIV, MUS, PIT, SPL, LUN.
TF	cluster	Term	Overlap	P.value	Adjusted.P.value	Odds.Ratio	Combined.Score	Genes	TF_rank	nuclear_receptors	mapped_name	tissue_cpm_gtex	tissue_log2_microarray	pattern_tissue_colocalization_gtex	pattern_tissue_colocalization_microarray
IRF8	cluster_D	IRF8 27001747 Chip-Seq BMDM Mouse	15/1500	8.33218e-08	5.23261e-05	7.465	121.678	CD274;IL33;CD52;LMO2;CXCL10;ESM1;CYTH4;LBH;MMP13;IRF1;IL1B;CCL4;S1PR2;PLEKHO2;CCR5	top1	FALSE	IRF8	FAT:28.798|ADR:NA|LUN:33.806|HTH:NA|SPL:188.876|MUS:NA|LIV:14.485|KID:NA|PIT:NA	FAT:9.136|ADR:9.34|LUN:NA|HTH:8.561|SPL:11.754|MUS:8.673|LIV:9.285|KID:9.153|PIT:8.493	TRUE	TRUE
RELB	cluster_D	RELB 30642670 ChIP-Seq CTB1 Human Placenta Inflammation	6/139	3.19532e-07	0.000100333	26.307	393.464	DUSP4;CD274;CD83;IL1B;CCL4;BHLHE40	top2	FALSE	RELB	FAT:20.923|ADR:14.725|LUN:30.603|HTH:NA|SPL:38.456|MUS:NA|LIV:NA|KID:NA|PIT:NA	FAT:8.982|ADR:9.611|LUN:NA|HTH:8.183|SPL:10.407|MUS:8.742|LIV:8.057|KID:8.125|PIT:7.945	FALSE	TRUE
SOX2	cluster_D	SOX2 21211035 ChIP-Seq LN229 Human	12/1590	4.17622e-05	0.00734519	4.992	50.341	DUSP4;EFNA1;RNF144A;CD52;FGF7;ESM1;CYTH4;CLEC7A;MRGPRF;APLNR;PCDH12;IFIT3	top3	FALSE	SOX2	FAT:NA|ADR:NA|LUN:NA|HTH:64.448|SPL:NA|MUS:NA|LIV:NA|KID:NA|PIT:25.59	FAT:8.007|ADR:7.668|LUN:NA|HTH:9.112|SPL:7.868|MUS:7.815|LIV:8.148|KID:7.91|PIT:8.309	TRUE	TRUE
RELA	cluster_D	RELA 24523406 ChIP-Seq FIBROSARCOMA Human	10/1104	4.67846e-05	0.00734519	5.748	57.311	CD274;CXCL10;CD83;CYTH4;IRF1;IL1B;CCL4;BHLHE40;TNFSF10;CCR5	top4	FALSE	RELA	FAT:110.885|ADR:69.248|LUN:133.105|HTH:32.047|SPL:115.164|MUS:64.616|LIV:59.016|KID:NA|PIT:71.658	FAT:12.062|ADR:12.36|LUN:NA|HTH:10.626|SPL:12.176|MUS:11.137|LIV:11.68|KID:11.116|PIT:11.344	TRUE	TRUE
KDM2B	cluster_D	KDM2B 26808549 Chip-Seq SUP-B15 Human	12/1666	6.59981e-05	0.00828936	4.743	45.659	DUSP4;EFNA1;CYTH4;LBH;SOX18;IRF1;LMO2;BHLHE40;NRARP;PCDH12;S1PR2;RASGRP1	top5	FALSE	KDM2B	FAT:24.795|ADR:18.857|LUN:36.24|HTH:19.149|SPL:54.757|MUS:12.678|LIV:18.981|KID:NA|PIT:27.482	FAT:9.521|ADR:9.548|LUN:NA|HTH:9.883|SPL:10.717|MUS:9.461|LIV:9.297|KID:9.557|PIT:9.449	TRUE	TRUE
STAT4	cluster_D	STAT4 19710469 ChIP-ChIP TH1 Mouse	9/1027	0.000154964	0.011583	5.402	47.389	CD274;CD52;CXCL10;ESM1;CD83;DBP;IRF1;TNFSF10;ASB2	top6	FALSE	STAT4	FAT:10.147|ADR:NA|LUN:18.215|HTH:10.086|SPL:29.284|MUS:NA|LIV:NA|KID:NA|PIT:33.689	FAT:8.516|ADR:8.154|LUN:NA|HTH:8.229|SPL:10.829|MUS:7.818|LIV:8.226|KID:7.95|PIT:8.257	FALSE	TRUE
NFKB1	cluster_D	NFKB1 27076634 ChIP-Seq BEAS2B Human Lung Inflammation	18/3823	0.000165539	0.011583	3.474	30.244	DUSP4;CD83;SEMA6A;LMO2;NRARP;MEOX2;RASGRP3;EFNA1;CXCL10;FGF7;ESM1;CYTH4;LBH;IRF1;IL1B;TNFSF10;PDE4B;ASB2	top7	FALSE	NFKB1	FAT:67.417|ADR:39.367|LUN:67.748|HTH:11.635|SPL:63.929|MUS:27.051|LIV:23.261|KID:NA|PIT:24.31	FAT:10.58|ADR:10.972|LUN:NA|HTH:9.99|SPL:12.019|MUS:10.415|LIV:10.281|KID:9.983|PIT:10.296	TRUE	TRUE
SMAD2/3	cluster_D	SMAD2/3 21741376 ChIP-Seq EPCs Human	11/1567	0.000181671	0.011583	4.486	38.643	DUSP4;RNF144A;ESM1;CD83;SEMA6A;BHLHE40;PDE4B;PLEKHO2;ASB2;IFIT3;APOL2	top8	FALSE	SMAD3	FAT:109.688|ADR:24.531|LUN:90.385|HTH:21.12|SPL:69.085|MUS:97.914|LIV:42.992|KID:NA|PIT:69.959	FAT:10.912|ADR:11.258|LUN:NA|HTH:10.262|SPL:11.127|MUS:12.152|LIV:10.247|KID:11.133|PIT:11.284	TRUE	TRUE
SMRT	cluster_D	SMRT 22465074 ChIP-Seq MACROPHAGES Mouse	11/1580	0.000195407	0.011583	4.446	37.971	CD274;CD52;CYTH4;LBH;CLEC7A;IRF1;IL1B;CCL4;APLNR;PLEKHO2;RASGRP3	top9	FALSE	NCOR2	FAT:153.237|ADR:181.491|LUN:260.454|HTH:103.327|SPL:146.077|MUS:181.129|LIV:56.651|KID:NA|PIT:383.406	FAT:NA|ADR:NA|LUN:NA|HTH:NA|SPL:NA|MUS:NA|LIV:NA|KID:NA|PIT:NA	TRUE	FALSE
GATA3	cluster_D	GATA3 26560356 Chip-Seq TH2 Human	11/1583	0.0001987	0.011583	4.437	37.819	IL33;CD52;ESM1;LBH;TNFSF10;PDE4B;S1PR2;ASB2;RASGRP1;SOX7;IFIT3	top10	FALSE	GATA3	FAT:NA|ADR:NA|LUN:NA|HTH:NA|SPL:12.747|MUS:NA|LIV:NA|KID:NA|PIT:11.306	FAT:8.584|ADR:9.672|LUN:NA|HTH:7.831|SPL:8.586|MUS:7.963|LIV:7.818|KID:9.487|PIT:7.671	FALSE	TRUE
IRF8	cluster_D	IRF8 22096565 ChIP-ChIP GC-B Human	4/150	0.00022516	0.011583	15.079	126.645	CLEC7A;LMO2;IFIT3;APOL2	top11	FALSE	IRF8	FAT:28.798|ADR:NA|LUN:33.806|HTH:NA|SPL:188.876|MUS:NA|LIV:14.485|KID:NA|PIT:NA	FAT:9.136|ADR:9.34|LUN:NA|HTH:8.561|SPL:11.754|MUS:8.673|LIV:9.285|KID:9.153|PIT:8.493	TRUE	TRUE
GATA3	cluster_D	GATA3 27048872 Chip-Seq THYMUS Human	11/1617	0.000239468	0.011583	4.335	36.141	EFNA1;RNF144A;CD52;CYTH4;LBH;DAPK2;TNFSF10;S1PR2;RASGRP1;IFIT3;RASGRP3	top12	FALSE	GATA3	FAT:NA|ADR:NA|LUN:NA|HTH:NA|SPL:12.747|MUS:NA|LIV:NA|KID:NA|PIT:11.306	FAT:8.584|ADR:9.672|LUN:NA|HTH:7.831|SPL:8.586|MUS:7.963|LIV:7.818|KID:9.487|PIT:7.671	FALSE	TRUE
MYB	cluster_D	MYB 26560356 Chip-Seq TH2 Human	11/1629	0.000255467	0.011583	4.3	35.571	RNF144A;ESM1;LBH;IL1B;BHLHE40;TNFSF10;CCR5;ASB2;RASGRP1;IFIT3;RASGRP3	top13	FALSE	MYB	FAT:NA|ADR:NA|LUN:NA|HTH:NA|SPL:NA|MUS:NA|LIV:NA|KID:NA|PIT:NA	FAT:7.858|ADR:7.78|LUN:NA|HTH:7.942|SPL:8.427|MUS:7.986|LIV:7.893|KID:7.846|PIT:8.005	FALSE	TRUE
MAF	cluster_D	MAF 26560356 Chip-Seq TH1 Human	11/1631	0.00025822	0.011583	4.294	35.477	DUSP4;RNF144A;CD52;DBP;LBH;SEMA6A;SOX18;BHLHE40;TNFSF10;ASB2;IFIT3	top14	FALSE	MAF	FAT:116.019|ADR:42.349|LUN:84.55|HTH:21.619|SPL:103.027|MUS:54.328|LIV:52.069|KID:NA|PIT:25.575	FAT:9.088|ADR:9.113|LUN:NA|HTH:8.422|SPL:9.91|MUS:11.156|LIV:9.998|KID:11.44|PIT:8.071	TRUE	TRUE
TP63	cluster_D	TP63 22573176 ChIP-Seq HFKS Human	16/3315	0.000356103	0.0149088	3.367	26.734	DUSP4;CD52;DAPK2;LMO2;PCDH12;SIRPB1;IFIT3;EFNA1;CYTH4;LBH;IRF1;TNFSF10;S1PR2;PLEKHO2;CCR5;ASB2	top15	FALSE	TRP63	FAT:NA|ADR:NA|LUN:NA|HTH:NA|SPL:NA|MUS:NA|LIV:NA|KID:NA|PIT:NA	FAT:8.814|ADR:8.268|LUN:NA|HTH:8.191|SPL:8.949|MUS:8.709|LIV:7.621|KID:7.967|PIT:8.117	FALSE	TRUE
CEBPB	cluster_D	CEBPB 26923725 Chip-Seq MACROPHAGESS Mouse	10/1450	0.000441073	0.0173121	4.287	33.123	CD52;CYTH4;LBH;MMP13;CLEC7A;IL1B;BHLHE40;TNFSF10;CCR5;IFIT3	top16	FALSE	CEBPB	FAT:176.779|ADR:130.429|LUN:169.177|HTH:17.272|SPL:114.108|MUS:120.021|LIV:132.369|KID:NA|PIT:38.078	FAT:12.864|ADR:13.63|LUN:NA|HTH:10.088|SPL:11.814|MUS:13.486|LIV:13.772|KID:11.979|PIT:12.37	TRUE	TRUE
FOXO1	cluster_D	FOXO1 32281255 ChIP-Seq Chondrocytes Human Osteoarthritis	6/531	0.000606714	0.0224127	6.533	48.391	DUSP4;BHLHE40;PDE4B;PCDH12;IFIT3;APOL2	top17	FALSE	FOXO1	FAT:104.15|ADR:28.44|LUN:68.138|HTH:13.875|SPL:40.232|MUS:178.519|LIV:28.209|KID:NA|PIT:32.602	FAT:10.462|ADR:9.696|LUN:NA|HTH:9.256|SPL:10.657|MUS:10.051|LIV:10.275|KID:10.062|PIT:10.193	TRUE	TRUE
RBPJ	cluster_D	RBPJ 21746931 ChIP-Seq IB4-LCL Human	10/1523	0.000650247	0.0226864	4.064	29.823	EFNA1;RNF144A;CD274;CYTH4;IRF1;MRGPRF;NRARP;PLEKHO2;SIRPB1;IFIT3	top18	FALSE	RBPJ	FAT:114.071|ADR:53.271|LUN:124.877|HTH:65.091|SPL:81.12|MUS:41.955|LIV:26.336|KID:NA|PIT:58.582	FAT:7.735|ADR:7.544|LUN:NA|HTH:7.631|SPL:7.7|MUS:7.671|LIV:7.581|KID:7.838|PIT:7.726	TRUE	FALSE
TBX20	cluster_D	TBX20 22080862 ChIP-Seq HEART Mouse	10/1589	0.000905157	0.026116	3.88	27.191	IL33;FGF7;LBH;MMP13;DAPK2;BHLHE40;PCDH12;PLEKHO2;ASB2;SOX7	top19	FALSE	TBX20	FAT:NA|ADR:NA|LUN:NA|HTH:NA|SPL:NA|MUS:NA|LIV:NA|KID:NA|PIT:NA	FAT:8.26|ADR:8.074|LUN:NA|HTH:7.72|SPL:7.817|MUS:8.092|LIV:8.029|KID:8.214|PIT:7.787	FALSE	TRUE
TBX20	cluster_D	TBX20 22328084 ChIP-Seq HEART Mouse	10/1589	0.000905157	0.026116	3.88	27.191	IL33;FGF7;LBH;MMP13;DAPK2;BHLHE40;PCDH12;PLEKHO2;ASB2;SOX7	top20	FALSE	TBX20	FAT:NA|ADR:NA|LUN:NA|HTH:NA|SPL:NA|MUS:NA|LIV:NA|KID:NA|PIT:NA	FAT:8.26|ADR:8.074|LUN:NA|HTH:7.72|SPL:7.817|MUS:8.092|LIV:8.029|KID:8.214|PIT:7.787	FALSE	TRUE
FOXO3	cluster_D	FOXO3 23340844 ChIP-Seq DLD1 Human	6/576	0.000927379	0.026116	6.003	41.921	EFNA1;IL33;LBH;BHLHE40;NRARP;APOL2	top21	FALSE	FOXO3	FAT:127.277|ADR:30.108|LUN:137.522|HTH:35.34|SPL:70.519|MUS:180.669|LIV:34.652|KID:NA|PIT:42.973	FAT:8.267|ADR:8.149|LUN:NA|HTH:8.21|SPL:9.297|MUS:7.997|LIV:8.691|KID:8.728|PIT:8.243	TRUE	TRUE
TAF2	cluster_D	TAF2 19829295 ChIP-Seq ESCs Human	10/1595	0.000931956	0.026116	3.864	26.966	DUSP4;CD52;CD83;MMP13;CLEC7A;IRF1;IL1B;MRGPRF;PLEKHO2;CCR5	top22	FALSE	TAF2	FAT:24.999|ADR:25.869|LUN:21.952|HTH:11.923|SPL:24.652|MUS:NA|LIV:11.37|KID:NA|PIT:22.372	FAT:8.69|ADR:9.228|LUN:NA|HTH:9.434|SPL:9.316|MUS:8.922|LIV:9.805|KID:8.777|PIT:8.889	FALSE	TRUE
SMRT	cluster_D	SMRT 27268052 Chip-Seq Bcells Human	10/1621	0.00105582	0.026116	3.797	26.02	FGF7;CD83;LBH;CLEC7A;IRF1;IL1B;BHLHE40;PLEKHO2;RASGRP1;IFIT3	top23	FALSE	NCOR2	FAT:153.237|ADR:181.491|LUN:260.454|HTH:103.327|SPL:146.077|MUS:181.129|LIV:56.651|KID:NA|PIT:383.406	FAT:NA|ADR:NA|LUN:NA|HTH:NA|SPL:NA|MUS:NA|LIV:NA|KID:NA|PIT:NA	TRUE	FALSE
RNF2	cluster_D	RNF2 18974828 ChIP-Seq MESCs Mouse	8/1066	0.00106158	0.026116	4.466	30.586	DUSP4;CD83;LBH;SEMA6A;SOX18;LMO2;MEOX2;SOX7	top24	FALSE	RNF2	FAT:13.207|ADR:NA|LUN:NA|HTH:NA|SPL:10.627|MUS:NA|LIV:NA|KID:NA|PIT:10.029	FAT:8.731|ADR:8.541|LUN:NA|HTH:8.114|SPL:8.265|MUS:8.239|LIV:8.294|KID:8.305|PIT:8.166	FALSE	TRUE
EZH2	cluster_D	EZH2 18974828 ChIP-Seq MESCs Mouse	8/1066	0.00106158	0.026116	4.466	30.586	DUSP4;CD83;LBH;SEMA6A;SOX18;LMO2;MEOX2;SOX7	top25	FALSE	EZH2	FAT:NA|ADR:NA|LUN:10.854|HTH:NA|SPL:17.294|MUS:NA|LIV:NA|KID:NA|PIT:NA	FAT:8.677|ADR:8.665|LUN:NA|HTH:8.642|SPL:10.198|MUS:8.543|LIV:8.721|KID:8.742|PIT:8.232	FALSE	TRUE
TCF21	cluster_D	TCF21 26020271 ChIP-Seq SMOOTH MUSCLE Human	10/1629	0.00109656	0.026116	3.776	25.737	DBP;CYTH4;MMP13;IRF1;BHLHE40;MRGPRF;PDE4B;S1PR2;PLEKHO2;RASGRP1	top26	FALSE	TCF21	FAT:26.048|ADR:NA|LUN:177.802|HTH:NA|SPL:100.309|MUS:NA|LIV:NA|KID:NA|PIT:11.916	FAT:8.187|ADR:9.435|LUN:NA|HTH:7.946|SPL:11.405|MUS:7.906|LIV:9.202|KID:10.23|PIT:8.572	TRUE	TRUE
TP63	cluster_D	TP63 23658742 ChIP-Seq EP156T Human	14/2937	0.00112282	0.026116	3.138	21.316	DUSP4;IL33;CD52;DAPK2;LMO2;PCDH12;SIRPB1;RASGRP3;LBH;CLEC7A;BHLHE40;TNFSF10;CCR5;ASB2	top27	FALSE	TRP63	FAT:NA|ADR:NA|LUN:NA|HTH:NA|SPL:NA|MUS:NA|LIV:NA|KID:NA|PIT:NA	FAT:8.814|ADR:8.268|LUN:NA|HTH:8.191|SPL:8.949|MUS:8.709|LIV:7.621|KID:7.967|PIT:8.117	FALSE	TRUE
PPARG	cluster_D	PPARG 20176806 ChIP-Seq MACROPHAGES Mouse	8/1083	0.00117576	0.0263707	4.392	29.627	DUSP4;FGF7;CYTH4;LMO2;BHLHE40;S1PR2;PLEKHO2;ASB2	top28	TRUE	PPARG	FAT:126.709|ADR:NA|LUN:22.652|HTH:NA|SPL:13.807|MUS:NA|LIV:NA|KID:NA|PIT:NA	FAT:13.372|ADR:11.26|LUN:NA|HTH:7.99|SPL:9.888|MUS:9.47|LIV:9.801|KID:8.222|PIT:7.832	TRUE	TRUE
STAT3	cluster_D	STAT3 20064451 ChIP-Seq CD4+T Mouse	7/843	0.00127279	0.0275625	4.852	32.349	DUSP4;CD52;CD83;MMP13;IRF1;LMO2;RASGRP1	top29	TRUE	STAT3	FAT:340.576|ADR:211.046|LUN:379.986|HTH:84.265|SPL:245.921|MUS:202.483|LIV:253.363|KID:NA|PIT:215.108	FAT:11.883|ADR:11.373|LUN:NA|HTH:10.396|SPL:11.569|MUS:11.368|LIV:11.861|KID:11.161|PIT:11.776	TRUE	TRUE
NFE2L2	cluster_D	NFE2L2 22581777 ChIP-Seq LYMPHOBLASTOID Human	5/425	0.00150937	0.0315962	6.646	43.175	CD274;SEMA6A;IRF1;S1PR2;ASB2	top30	FALSE	NFE2L2	FAT:137.34|ADR:87.683|LUN:118.604|HTH:50.194|SPL:80.759|MUS:54.788|LIV:49.833|KID:NA|PIT:104.104	FAT:9.686|ADR:9.896|LUN:NA|HTH:8.347|SPL:9.167|MUS:9.394|LIV:9.659|KID:9.252|PIT:9.119	TRUE	TRUE
NR3C1	cluster_D	NR3C1 27076634 ChIP-Seq BEAS2B Human Lung Inflammation	14/3084	0.00182009	0.0368715	2.962	18.689	DUSP4;CD83;SEMA6A;DAPK2;EFNA1;RNF144A;ESM1;CYTH4;LBH;IRF1;IL1B;TNFSF10;SOX7;APOL2	top31	TRUE	NR3C1	FAT:90.796|ADR:22.305|LUN:74.366|HTH:32.889|SPL:46.401|MUS:75.227|LIV:37.687|KID:NA|PIT:64.784	FAT:7.997|ADR:7.926|LUN:NA|HTH:7.918|SPL:7.842|MUS:7.992|LIV:8.027|KID:7.9|PIT:7.872	TRUE	TRUE
TP53	cluster_D	TP53 20018659 ChIP-ChIP R1E Mouse	7/909	0.00196172	0.0384988	4.482	27.939	DUSP4;SEMA6A;SOX18;LMO2;NRARP;MEOX2;SOX7	top32	FALSE	TRP53	FAT:NA|ADR:NA|LUN:NA|HTH:NA|SPL:NA|MUS:NA|LIV:NA|KID:NA|PIT:NA	FAT:9.395|ADR:10.582|LUN:NA|HTH:9.668|SPL:11.31|MUS:9.539|LIV:9.822|KID:9.745|PIT:10.217	FALSE	TRUE
IRF1	cluster_D	IRF1 21803131 ChIP-Seq MONOCYTES Human	4/276	0.00219422	0.0417566	8.042	49.236	DUSP4;CD274;IFIT3;APOL2	top33	FALSE	IRF1	FAT:70.282|ADR:25.674|LUN:174.748|HTH:12.921|SPL:176.011|MUS:10.953|LIV:32.611|KID:NA|PIT:33.582	FAT:12.671|ADR:12.733|LUN:NA|HTH:10.268|SPL:13.654|MUS:11.263|LIV:12.038|KID:11.412|PIT:12.806	TRUE	TRUE
MECOM	cluster_D	MECOM 23826213 ChIP-Seq KASUMI Mouse	9/1527	0.00269901	0.0498523	3.527	20.862	CD274;CD52;LBH;CLEC7A;IL1B;LMO2;TNFSF10;S1PR2;PLEKHO2	top34	FALSE	MECOM	FAT:38.892|ADR:NA|LUN:44.378|HTH:NA|SPL:13.164|MUS:NA|LIV:NA|KID:NA|PIT:15.899	FAT:8.329|ADR:8.252|LUN:NA|HTH:8.171|SPL:8.502|MUS:8.229|LIV:8.384|KID:8.434|PIT:8.327	FALSE	TRUE
NR3C1	cluster_D	NR3C1 23031785 ChIP-Seq PC12 Mouse	6/730	0.00308269	0.0538719	4.689	27.11	RNF144A;CD83;DAPK2;PDE4B;APLNR;PCDH12	top35	TRUE	NR3C1	FAT:90.796|ADR:22.305|LUN:74.366|HTH:32.889|SPL:46.401|MUS:75.227|LIV:37.687|KID:NA|PIT:64.784	FAT:7.997|ADR:7.926|LUN:NA|HTH:7.918|SPL:7.842|MUS:7.992|LIV:8.027|KID:7.9|PIT:7.872	TRUE	TRUE
THRA	cluster_D	THRA 23701648 ChIP-Seq CEREBELLUM Mouse	3/146	0.00308959	0.0538719	11.236	64.942	DAPK2;LMO2;MRGPRF	top36	TRUE	THRA	FAT:95.174|ADR:96.875|LUN:87.295|HTH:249.908|SPL:38.755|MUS:86.579|LIV:19.045|KID:NA|PIT:116.413	FAT:10.48|ADR:9.574|LUN:NA|HTH:11.56|SPL:9.108|MUS:10.238|LIV:8.704|KID:9.68|PIT:9.995	TRUE	TRUE
SUZ12	cluster_D	SUZ12 18974828 ChIP-Seq MESCs Mouse	9/1564	0.00317398	0.0538719	3.436	19.768	DUSP4;CD83;LBH;SEMA6A;SOX18;LMO2;MEOX2;RASGRP1;SOX7	top37	FALSE	SUZ12	FAT:26.121|ADR:25.605|LUN:30.633|HTH:15.493|SPL:35.385|MUS:12.387|LIV:15.423|KID:NA|PIT:23.595	FAT:11.658|ADR:11.925|LUN:NA|HTH:11.585|SPL:12.494|MUS:11.249|LIV:11.418|KID:11.83|PIT:11.709	FALSE	TRUE
FOXH1	cluster_D	FOXH1 21741376 ChIP-Seq ESCs Human	9/1589	0.00353109	0.0570151	3.377	19.069	CD83;SEMA6A;DAPK2;IRF1;BHLHE40;MRGPRF;PLEKHO2;ASB2;APOL2	top38	FALSE	FOXH1	FAT:10.451|ADR:14.016|LUN:16.251|HTH:41.699|SPL:27.57|MUS:NA|LIV:10.315|KID:NA|PIT:45.635	FAT:7.63|ADR:7.546|LUN:NA|HTH:7.558|SPL:7.651|MUS:7.553|LIV:7.544|KID:7.697|PIT:7.497	FALSE	FALSE
ISL1	cluster_D	ISL1 27105846 Chip-Seq CPCs Mouse	8/1293	0.00358446	0.0570151	3.633	20.459	DUSP4;EFNA1;CD83;DBP;MMP13;DAPK2;BHLHE40;RASGRP3	top39	FALSE	ISL1	FAT:NA|ADR:NA|LUN:NA|HTH:NA|SPL:NA|MUS:NA|LIV:NA|KID:NA|PIT:NA	FAT:8.778|ADR:10.423|LUN:NA|HTH:11.443|SPL:8.377|MUS:8.117|LIV:7.621|KID:7.663|PIT:11.136	FALSE	TRUE
P63	cluster_D	P63 20808887 ChIP-Seq KERATINOCYTES Human	9/1598	0.00366722	0.0570151	3.357	18.824	DUSP4;CD274;FGF7;IL1B;BHLHE40;PCDH12;RASGRP1;SOX7;APOL2	top40	FALSE	TRP63	FAT:NA|ADR:NA|LUN:NA|HTH:NA|SPL:NA|MUS:NA|LIV:NA|KID:NA|PIT:NA	FAT:8.814|ADR:8.268|LUN:NA|HTH:8.191|SPL:8.949|MUS:8.709|LIV:7.621|KID:7.967|PIT:8.117	FALSE	TRUE
SUZ12	cluster_D	SUZ12 18692474 ChIP-Seq MEFs Mouse	7/1019	0.00372233	0.0570151	3.972	22.215	CD83;SEMA6A;SOX18;LMO2;MEOX2;RASGRP1;SOX7	top41	FALSE	SUZ12	FAT:26.121|ADR:25.605|LUN:30.633|HTH:15.493|SPL:35.385|MUS:12.387|LIV:15.423|KID:NA|PIT:23.595	FAT:11.658|ADR:11.925|LUN:NA|HTH:11.585|SPL:12.494|MUS:11.249|LIV:11.418|KID:11.83|PIT:11.709	FALSE	TRUE
SRY	cluster_D	SRY 25088423 ChIP-ChIP EMBRYONIC GONADS Mouse	12/2614	0.00394777	0.0590285	2.859	15.823	DUSP4;EFNA1;CD83;DBP;IRF1;MRGPRF;TNFSF10;NRARP;PCDH12;S1PR2;RASGRP1;SOX7	top42	FALSE	SRY	FAT:NA|ADR:NA|LUN:NA|HTH:NA|SPL:NA|MUS:NA|LIV:NA|KID:NA|PIT:NA	FAT:7.64|ADR:7.554|LUN:NA|HTH:7.477|SPL:7.497|MUS:7.559|LIV:7.579|KID:7.542|PIT:7.596	FALSE	FALSE
TCF7	cluster_D	TCF7 22412390 ChIP-Seq EML Mouse	9/1635	0.00427137	0.0623505	3.274	17.86	DUSP4;RNF144A;DBP;SOX18;DAPK2;LMO2;BHLHE40;ASB2;SOX7	top43	FALSE	TCF7	FAT:NA|ADR:NA|LUN:12.05|HTH:NA|SPL:44.904|MUS:NA|LIV:NA|KID:NA|PIT:17.488	FAT:8.267|ADR:9.166|LUN:NA|HTH:7.944|SPL:9.583|MUS:7.82|LIV:8.183|KID:8.174|PIT:7.609	FALSE	TRUE
P53	cluster_D	P53 22127205 ChIP-Seq FIBROBLAST Human	5/545	0.00441727	0.0623505	5.138	27.857	IL33;CD83;CCL4;PLEKHO2;APOL2	top44	FALSE	TRP53	FAT:NA|ADR:NA|LUN:NA|HTH:NA|SPL:NA|MUS:NA|LIV:NA|KID:NA|PIT:NA	FAT:9.395|ADR:10.582|LUN:NA|HTH:9.668|SPL:11.31|MUS:9.539|LIV:9.822|KID:9.745|PIT:10.217	FALSE	TRUE
ATF3	cluster_D	ATF3 23680149 ChIP-Seq GBM1-GSC Human	9/1652	0.00457415	0.0623505	3.237	17.437	DUSP4;EFNA1;ESM1;DAPK2;BHLHE40;PDE4B;ASB2;IFIT3;APOL2	top45	FALSE	ATF3	FAT:215.549|ADR:33.222|LUN:152.064|HTH:25.448|SPL:14.773|MUS:18.44|LIV:81.476|KID:NA|PIT:65.401	FAT:8.084|ADR:7.88|LUN:NA|HTH:7.694|SPL:7.937|MUS:9.112|LIV:7.941|KID:7.794|PIT:7.662	TRUE	TRUE
STAT5A	cluster_D	STAT5A 24692510 ChIP-Seq Epithelium Mouse Mammary	10/1977	0.0046198	0.0623505	3.049	16.396	CD274;IL33;DBP;SEMA6A;IRF1;PDE4B;PCDH12;S1PR2;RASGRP1;RASGRP3	top46	FALSE	STAT5A	FAT:118.824|ADR:98.509|LUN:66.159|HTH:16.288|SPL:83.851|MUS:34.006|LIV:11.643|KID:NA|PIT:33.373	FAT:10.391|ADR:9.222|LUN:NA|HTH:8.087|SPL:10.023|MUS:9.23|LIV:9.17|KID:9.132|PIT:9.046	TRUE	TRUE
SUZ12	cluster_D	SUZ12 27294783 Chip-Seq ESCs Mouse	9/1657	0.00466636	0.0623505	3.226	17.315	DUSP4;EFNA1;RNF144A;CD83;SEMA6A;BHLHE40;NRARP;MEOX2;SOX7	top47	FALSE	SUZ12	FAT:26.121|ADR:25.605|LUN:30.633|HTH:15.493|SPL:35.385|MUS:12.387|LIV:15.423|KID:NA|PIT:23.595	FAT:11.658|ADR:11.925|LUN:NA|HTH:11.585|SPL:12.494|MUS:11.249|LIV:11.418|KID:11.83|PIT:11.709	FALSE	TRUE
PRDM14	cluster_D	PRDM14 20953172 ChIP-Seq ESCs Human	8/1374	0.00518156	0.0677921	3.403	17.909	RNF144A;IL33;ESM1;CD83;CLEC7A;IRF1;CCR5;IFIT3	top48	FALSE	PRDM14	FAT:NA|ADR:NA|LUN:NA|HTH:NA|SPL:NA|MUS:NA|LIV:NA|KID:NA|PIT:NA	FAT:7.686|ADR:7.631|LUN:NA|HTH:7.615|SPL:7.551|MUS:7.622|LIV:7.672|KID:7.533|PIT:7.575	FALSE	FALSE
SPI1	cluster_D	SPI1 23547873 ChIP-Seq NB4 Human	12/2723	0.00552242	0.0707771	2.727	14.177	CD274;CD52;DBP;CYTH4;IL1B;CCL4;BHLHE40;TNFSF10;NRARP;PCDH12;PLEKHO2;SIRPB1	top49	FALSE	SPI1	FAT:28.676|ADR:15.336|LUN:89.426|HTH:NA|SPL:150.697|MUS:NA|LIV:NA|KID:NA|PIT:NA	FAT:8.215|ADR:7.821|LUN:NA|HTH:7.698|SPL:9.182|MUS:7.894|LIV:8.12|KID:7.953|PIT:7.707	TRUE	TRUE
ERG	cluster_D	ERG 20517297 ChIP-Seq VCAP Human	6/853	0.00657003	0.0823067	3.982	20.011	EFNA1;CXCL10;DBP;LBH;SEMA6A;SIRPB1	top50	FALSE	ERG	FAT:61.438|ADR:11.512|LUN:61.424|HTH:NA|SPL:71.271|MUS:NA|LIV:NA|KID:NA|PIT:NA	FAT:7.759|ADR:7.754|LUN:NA|HTH:7.722|SPL:7.695|MUS:7.604|LIV:7.832|KID:7.906|PIT:7.64	TRUE	FALSE
RXRA	cluster_D	RXRA 24833708 ChIP-Seq LIVER Mouse	8/1434	0.00668414	0.0823067	3.249	16.273	CD52;CXCL10;CYTH4;CLEC7A;IL1B;CCL4;LMO2;RASGRP1	top51	TRUE	RXRA	FAT:132.69|ADR:129.546|LUN:90.793|HTH:59.489|SPL:141.53|MUS:235.963|LIV:227.376|KID:NA|PIT:128.713	FAT:9.134|ADR:8.297|LUN:NA|HTH:8.121|SPL:8.228|MUS:8.958|LIV:10.024|KID:9.071|PIT:7.911	TRUE	TRUE
TP63	cluster_D	TP63 30713093 ChIP-Seq Epithelial Human Tongue SCC	10/2100	0.00707377	0.0839201	2.85	14.112	EFNA1;CYTH4;LBH;SEMA6A;CLEC7A;BHLHE40;NRARP;ASB2;SOX7;RASGRP3	top52	FALSE	TRP63	FAT:NA|ADR:NA|LUN:NA|HTH:NA|SPL:NA|MUS:NA|LIV:NA|KID:NA|PIT:NA	FAT:8.814|ADR:8.268|LUN:NA|HTH:8.191|SPL:8.949|MUS:8.709|LIV:7.621|KID:7.967|PIT:8.117	FALSE	TRUE
NFE2L2	cluster_D	NFE2L2 20460467 ChIP-Seq MEFs Mouse	6/870	0.00721606	0.0839201	3.9	19.234	DUSP4;IL33;FGF7;LBH;IFIT3;RASGRP3	top53	FALSE	NFE2L2	FAT:137.34|ADR:87.683|LUN:118.604|HTH:50.194|SPL:80.759|MUS:54.788|LIV:49.833|KID:NA|PIT:104.104	FAT:9.686|ADR:9.896|LUN:NA|HTH:8.347|SPL:9.167|MUS:9.394|LIV:9.659|KID:9.252|PIT:9.119	TRUE	TRUE
NRF2	cluster_D	NRF2 20460467 ChIP-Seq MEFs Mouse	6/870	0.00721606	0.0839201	3.9	19.234	DUSP4;IL33;FGF7;LBH;IFIT3;RASGRP3	top54	FALSE	NFE2L2	FAT:137.34|ADR:87.683|LUN:118.604|HTH:50.194|SPL:80.759|MUS:54.788|LIV:49.833|KID:NA|PIT:104.104	FAT:9.686|ADR:9.896|LUN:NA|HTH:8.347|SPL:9.167|MUS:9.394|LIV:9.659|KID:9.252|PIT:9.119	TRUE	TRUE
SUZ12	cluster_D	SUZ12 20075857 ChIP-Seq MESCs Mouse	14/3611	0.00798254	0.0896113	2.449	11.832	DUSP4;CD83;SEMA6A;DAPK2;LMO2;NRARP;MEOX2;RASGRP1;RNF144A;DBP;LBH;SOX18;BHLHE40;SOX7	top55	FALSE	SUZ12	FAT:26.121|ADR:25.605|LUN:30.633|HTH:15.493|SPL:35.385|MUS:12.387|LIV:15.423|KID:NA|PIT:23.595	FAT:11.658|ADR:11.925|LUN:NA|HTH:11.585|SPL:12.494|MUS:11.249|LIV:11.418|KID:11.83|PIT:11.709	FALSE	TRUE
MTF2	cluster_D	MTF2 20144788 ChIP-Seq MESCs Mouse	11/2488	0.00799082	0.0896113	2.677	12.93	DUSP4;EFNA1;RNF144A;CD83;LBH;SEMA6A;SOX18;LMO2;NRARP;MEOX2;SOX7	top56	FALSE	MTF2	FAT:17.013|ADR:18.245|LUN:24.649|HTH:14.796|SPL:31.666|MUS:NA|LIV:NA|KID:NA|PIT:21.698	FAT:10.16|ADR:10.515|LUN:NA|HTH:11.086|SPL:11.677|MUS:10.578|LIV:10.223|KID:10.521|PIT:11.382	FALSE	TRUE
STAT5	cluster_D	STAT5 23275557 ChIP-Seq MAMMARY-EPITHELIUM Mouse	6/897	0.00833587	0.091447	3.777	18.08	IL33;DBP;SEMA6A;IRF1;PCDH12;RASGRP1	top57	FALSE	STAT5A/STAT5B	FAT:NA|ADR:NA|LUN:NA|HTH:NA|SPL:NA|MUS:NA|LIV:NA|KID:NA|PIT:NA	FAT:NA|ADR:NA|LUN:NA|HTH:NA|SPL:NA|MUS:NA|LIV:NA|KID:NA|PIT:NA	FALSE	FALSE
TEAD4	cluster_D	TEAD4 26923725 Chip-Seq HEMANGIOBLAST Mouse	4/406	0.00859136	0.091447	5.406	25.715	IL33;CD83;SEMA6A;CCR5	top59	FALSE	TEAD4	FAT:15.884|ADR:NA|LUN:25.886|HTH:NA|SPL:NA|MUS:57.98|LIV:NA|KID:NA|PIT:NA	FAT:7.913|ADR:7.725|LUN:NA|HTH:7.723|SPL:7.718|MUS:8.092|LIV:7.737|KID:7.94|PIT:7.785	TRUE	TRUE
POU5F1	cluster_D	POU5F1 26923725 Chip-Seq MESODERM Mouse	4/406	0.00859136	0.091447	5.406	25.715	IL33;CD83;SEMA6A;CCR5	top58	FALSE	POU5F1	FAT:NA|ADR:NA|LUN:NA|HTH:NA|SPL:NA|MUS:NA|LIV:NA|KID:NA|PIT:NA	FAT:8.022|ADR:7.925|LUN:NA|HTH:7.917|SPL:8.231|MUS:8.23|LIV:8.082|KID:7.875|PIT:8.217	FALSE	TRUE
EBF1	cluster_D	EBF1 22473956 ChIP-Seq LYMPHODE Mouse	8/1505	0.00887141	0.0928541	3.083	14.569	FGF7;SOX18;IL1B;LMO2;TNFSF10;APLNR;NRARP;RASGRP1	top60	FALSE	EBF1	FAT:70.675|ADR:NA|LUN:15.444|HTH:NA|SPL:16.021|MUS:NA|LIV:NA|KID:NA|PIT:NA	FAT:9.798|ADR:9.314|LUN:NA|HTH:8.121|SPL:8.034|MUS:8.784|LIV:7.831|KID:8.254|PIT:8.052	TRUE	TRUE
SOX9	cluster_D	SOX9 24532713 ChIP-Seq HFSC Mouse	7/1203	0.00910425	0.093729	3.328	15.638	IL33;LBH;DAPK2;IRF1;BHLHE40;MRGPRF;PDE4B	top61	FALSE	SOX9	FAT:NA|ADR:NA|LUN:NA|HTH:55.137|SPL:NA|MUS:NA|LIV:NA|KID:NA|PIT:31.774	FAT:9.148|ADR:9.427|LUN:NA|HTH:12.742|SPL:8.915|MUS:10.244|LIV:10.53|KID:8.553|PIT:10.932	TRUE	TRUE
WT1	cluster_D	WT1 25993318 ChIP-Seq PODOCYTE Human	12/2909	0.00936049	0.0948127	2.524	11.791	DUSP4;IL33;CD83;DBP;SEMA6A;DAPK2;MRGPRF;TNFSF10;NRARP;S1PR2;PLEKHO2;RASGRP1	top62	FALSE	WT1	FAT:47.483|ADR:NA|LUN:NA|HTH:NA|SPL:36.952|MUS:NA|LIV:NA|KID:NA|PIT:NA	FAT:9.827|ADR:8.801|LUN:NA|HTH:7.941|SPL:10.319|MUS:7.771|LIV:8.389|KID:10.239|PIT:7.631	FALSE	TRUE
SUZ12	cluster_D	SUZ12 18692474 ChIP-Seq MESCs Mouse	8/1531	0.00979534	0.0976424	3.026	14	CD83;LBH;SEMA6A;SOX18;LMO2;MEOX2;RASGRP1;SOX7	top63	FALSE	SUZ12	FAT:26.121|ADR:25.605|LUN:30.633|HTH:15.493|SPL:35.385|MUS:12.387|LIV:15.423|KID:NA|PIT:23.595	FAT:11.658|ADR:11.925|LUN:NA|HTH:11.585|SPL:12.494|MUS:11.249|LIV:11.418|KID:11.83|PIT:11.709	FALSE	TRUE
SUZ12	cluster_D	SUZ12 16625203 ChIP-ChIP MESCs Mouse	6/944	0.0105785	0.102707	3.579	16.279	CD83;LBH;SEMA6A;SOX18;MEOX2;SOX7	top64	FALSE	SUZ12	FAT:26.121|ADR:25.605|LUN:30.633|HTH:15.493|SPL:35.385|MUS:12.387|LIV:15.423|KID:NA|PIT:23.595	FAT:11.658|ADR:11.925|LUN:NA|HTH:11.585|SPL:12.494|MUS:11.249|LIV:11.418|KID:11.83|PIT:11.709	FALSE	TRUE
SOX2	cluster_D	SOX2 30713093 ChIP-Seq Epithelial Human Tongue SCC	6/945	0.0106305	0.102707	3.575	16.244	FGF7;TNFSF10;NRARP;ASB2;RASGRP3;APOL2	top65	FALSE	SOX2	FAT:NA|ADR:NA|LUN:NA|HTH:64.448|SPL:NA|MUS:NA|LIV:NA|KID:NA|PIT:25.59	FAT:8.007|ADR:7.668|LUN:NA|HTH:9.112|SPL:7.868|MUS:7.815|LIV:8.148|KID:7.91|PIT:8.309	TRUE	TRUE
IRF1	cluster_D	IRF1 21803131 ChIP-Seq PrimaryMonocytes Human Connective	2/79	0.0109039	0.103752	13.591	61.411	PDE4B;IFIT3	top66	FALSE	IRF1	FAT:70.282|ADR:25.674|LUN:174.748|HTH:12.921|SPL:176.011|MUS:10.953|LIV:32.611|KID:NA|PIT:33.582	FAT:12.671|ADR:12.733|LUN:NA|HTH:10.268|SPL:13.654|MUS:11.263|LIV:12.038|KID:11.412|PIT:12.806	TRUE	TRUE
TP53	cluster_D	TP53 18474530 ChIP-ChIP U2OS Human	5/687	0.0114779	0.105362	4.038	18.04	CD83;SEMA6A;IL1B;TNFSF10;APLNR	top67	FALSE	TRP53	FAT:NA|ADR:NA|LUN:NA|HTH:NA|SPL:NA|MUS:NA|LIV:NA|KID:NA|PIT:NA	FAT:9.395|ADR:10.582|LUN:NA|HTH:9.668|SPL:11.31|MUS:9.539|LIV:9.822|KID:9.745|PIT:10.217	FALSE	TRUE
HAND2	cluster_D	HAND2 30127528 ChIP-Seq KELLY Human Brain Neuroblastoma	13/3383	0.0118627	0.105362	2.37	10.511	DUSP4;CD83;SEMA6A;MRGPRF;EFNA1;FGF7;IRF1;BHLHE40;PDE4B;S1PR2;ASB2;SOX7;APOL2	top68	FALSE	HAND2	FAT:20.858|ADR:13.691|LUN:NA|HTH:NA|SPL:NA|MUS:NA|LIV:10.83|KID:NA|PIT:NA	FAT:7.498|ADR:8.663|LUN:NA|HTH:7.634|SPL:7.56|MUS:7.641|LIV:7.822|KID:7.513|PIT:7.503	FALSE	TRUE
SMAD3	cluster_D	SMAD3 21741376 ChIP-Seq EPCs Human	7/1272	0.0121636	0.105362	3.135	13.823	RNF144A;ESM1;CD83;BHLHE40;PDE4B;PLEKHO2;ASB2	top69	FALSE	SMAD3	FAT:109.688|ADR:24.531|LUN:90.385|HTH:21.12|SPL:69.085|MUS:97.914|LIV:42.992|KID:NA|PIT:69.959	FAT:10.912|ADR:11.258|LUN:NA|HTH:10.262|SPL:11.127|MUS:12.152|LIV:10.247|KID:11.133|PIT:11.284	TRUE	TRUE
PHC1	cluster_D	PHC1 16625203 ChIP-ChIP MESCs Mouse	5/700	0.0123731	0.105362	3.96	17.393	DUSP4;SEMA6A;SOX18;LMO2;SOX7	top70	FALSE	PHC1	FAT:30.846|ADR:28.472|LUN:38.457|HTH:28.4|SPL:46.5|MUS:12.695|LIV:NA|KID:NA|PIT:100.682	FAT:10.402|ADR:10.458|LUN:NA|HTH:11.142|SPL:10.265|MUS:10.665|LIV:9.103|KID:11.149|PIT:11.411	TRUE	TRUE
SMAD4	cluster_D	SMAD4 21741376 ChIP-Seq ESCs Human	8/1595	0.0123789	0.105362	2.894	12.711	SEMA6A;IL1B;BHLHE40;MRGPRF;PCDH12;PLEKHO2;RASGRP1;APOL2	top71	FALSE	SMAD4	FAT:71.637|ADR:57.013|LUN:79.538|HTH:33.008|SPL:69.169|MUS:71.587|LIV:42.363|KID:NA|PIT:76.606	FAT:12.695|ADR:12.959|LUN:NA|HTH:12.213|SPL:12.963|MUS:12.913|LIV:12.309|KID:12.6|PIT:13.501	TRUE	TRUE
KLF4	cluster_D	KLF4 18264089 ChIP-ChIP MESCs Mouse	2/85	0.0125397	0.105362	12.604	55.192	CD83;SOX18	top74	FALSE	KLF4	FAT:222.672|ADR:32.645|LUN:183.608|HTH:11.975|SPL:80.849|MUS:23.755|LIV:NA|KID:NA|PIT:22.653	FAT:10.572|ADR:8.77|LUN:NA|HTH:8.333|SPL:8.737|MUS:9.745|LIV:8.333|KID:8.912|PIT:8.471	TRUE	TRUE
KLF5	cluster_D	KLF5 18264089 ChIP-ChIP MESCs Mouse	2/85	0.0125397	0.105362	12.604	55.192	CD83;SOX18	top72	FALSE	KLF5	FAT:12.957|ADR:NA|LUN:36.252|HTH:NA|SPL:NA|MUS:19.664|LIV:NA|KID:NA|PIT:24.614	FAT:8.928|ADR:9.703|LUN:NA|HTH:9.288|SPL:9.191|MUS:9.834|LIV:8.179|KID:8.549|PIT:9.645	FALSE	TRUE
KLF2	cluster_D	KLF2 18264089 ChIP-ChIP MESCs Mouse	2/85	0.0125397	0.105362	12.604	55.192	CD83;SOX18	top73	FALSE	KLF2	FAT:148.05|ADR:27.42|LUN:128.06|HTH:13.84|SPL:84.524|MUS:29.091|LIV:NA|KID:NA|PIT:35.748	FAT:11.469|ADR:10.913|LUN:NA|HTH:9.566|SPL:12.933|MUS:10.623|LIV:9.919|KID:10.156|PIT:9.432	TRUE	TRUE
SMAD4	cluster_D	SMAD4 21741376 ChIP-Seq EPCs Human	8/1603	0.0127346	0.105362	2.879	12.56	DUSP4;RNF144A;BHLHE40;PLEKHO2;CCR5;ASB2;IFIT3;APOL2	top75	FALSE	SMAD4	FAT:71.637|ADR:57.013|LUN:79.538|HTH:33.008|SPL:69.169|MUS:71.587|LIV:42.363|KID:NA|PIT:76.606	FAT:12.695|ADR:12.959|LUN:NA|HTH:12.213|SPL:12.963|MUS:12.913|LIV:12.309|KID:12.6|PIT:13.501	TRUE	TRUE
SPI1	cluster_D	SPI1 20517297 ChIP-Seq HL60 Human	6/990	0.0131643	0.105362	3.403	14.737	RNF144A;IL33;DBP;CCL4;PCDH12;SOX7	top76	FALSE	SPI1	FAT:28.676|ADR:15.336|LUN:89.426|HTH:NA|SPL:150.697|MUS:NA|LIV:NA|KID:NA|PIT:NA	FAT:8.215|ADR:7.821|LUN:NA|HTH:7.698|SPL:9.182|MUS:7.894|LIV:8.12|KID:7.953|PIT:7.707	TRUE	TRUE
LXR	cluster_D	LXR 22292898 ChIP-Seq THP-1 Human	8/1614	0.0132359	0.105362	2.857	12.356	DUSP4;RNF144A;BHLHE40;TNFSF10;NRARP;CCR5;ASB2;SOX7	top77	TRUE	NR1H3	FAT:85.357|ADR:27.267|LUN:41.438|HTH:NA|SPL:91.42|MUS:NA|LIV:61.118|KID:NA|PIT:13.787	FAT:12.356|ADR:10.386|LUN:NA|HTH:8.746|SPL:12.001|MUS:10.815|LIV:12.363|KID:11.505|PIT:9.269	TRUE	TRUE
FOXA1	cluster_D	FOXA1 27197147 Chip-Seq ENDOMETRIOID-ADENOCARCINOMA Human	4/462	0.0133238	0.105362	4.731	20.43	LBH;DAPK2;BHLHE40;TNFSF10	top78	FALSE	FOXA1	FAT:NA|ADR:NA|LUN:10.206|HTH:NA|SPL:NA|MUS:NA|LIV:26.34|KID:NA|PIT:NA	FAT:8.405|ADR:8.473|LUN:NA|HTH:8.791|SPL:8.254|MUS:8.767|LIV:10.482|KID:8.133|PIT:7.865	FALSE	TRUE
IRF8	cluster_D	IRF8 22096565 ChIP-ChIP GC-B Mouse	4/463	0.0134208	0.105362	4.721	20.35	CD274;CD52;CXCL10;TNFSF10	top79	FALSE	IRF8	FAT:28.798|ADR:NA|LUN:33.806|HTH:NA|SPL:188.876|MUS:NA|LIV:14.485|KID:NA|PIT:NA	FAT:9.136|ADR:9.34|LUN:NA|HTH:8.561|SPL:11.754|MUS:8.673|LIV:9.285|KID:9.153|PIT:8.493	TRUE	TRUE
TET1	cluster_D	TET1 21490601 ChIP-Seq MESCs Mouse	8/1618	0.0134218	0.105362	2.849	12.283	EFNA1;SEMA6A;IRF1;LMO2;BHLHE40;NRARP;PCDH12;S1PR2	top80	FALSE	TET1	FAT:NA|ADR:NA|LUN:NA|HTH:NA|SPL:NA|MUS:NA|LIV:NA|KID:NA|PIT:NA	FAT:7.628|ADR:8.047|LUN:NA|HTH:8.449|SPL:8.637|MUS:8.109|LIV:7.603|KID:8.112|PIT:8.958	FALSE	TRUE
CTCF	cluster_D	CTCF 21964334 Chip-Seq Bcells Human	8/1646	0.0147782	0.114291	2.796	11.786	FGF7;CD83;SEMA6A;LMO2;S1PR2;CCR5;RASGRP1;RASGRP3	top81	FALSE	CTCF	FAT:38.255|ADR:31.72|LUN:38.483|HTH:25.258|SPL:52.024|MUS:34.038|LIV:19.431|KID:NA|PIT:33.605	FAT:10.174|ADR:10.54|LUN:NA|HTH:10.095|SPL:11.249|MUS:10.172|LIV:10.004|KID:10.241|PIT:10.401	TRUE	TRUE
GATA2	cluster_D	GATA2 20887958 ChIP-Seq HPC-7 Mouse	7/1324	0.0149233	0.114291	3.003	12.626	DUSP4;CD274;FGF7;IL1B;PCDH12;S1PR2;PLEKHO2	top82	FALSE	GATA2	FAT:27.196|ADR:NA|LUN:85.161|HTH:NA|SPL:28.334|MUS:NA|LIV:NA|KID:NA|PIT:24.818	FAT:9.421|ADR:11.858|LUN:NA|HTH:9.086|SPL:9.99|MUS:9.922|LIV:8.806|KID:10.79|PIT:12.158	TRUE	TRUE
KDM2B	cluster_D	KDM2B 26808549 Chip-Seq JURKAT Human	8/1660	0.0154933	0.117226	2.771	11.546	DUSP4;EFNA1;RNF144A;DBP;IRF1;BHLHE40;NRARP;IFIT3	top83	FALSE	KDM2B	FAT:24.795|ADR:18.857|LUN:36.24|HTH:19.149|SPL:54.757|MUS:12.678|LIV:18.981|KID:NA|PIT:27.482	FAT:9.521|ADR:9.548|LUN:NA|HTH:9.883|SPL:10.717|MUS:9.461|LIV:9.297|KID:9.557|PIT:9.449	TRUE	TRUE
KDM2B	cluster_D	KDM2B 26808549 Chip-Seq K562 Human	8/1673	0.0161799	0.120519	2.747	11.329	EFNA1;CD83;LBH;SOX18;BHLHE40;NRARP;S1PR2;RASGRP1	top84	FALSE	KDM2B	FAT:24.795|ADR:18.857|LUN:36.24|HTH:19.149|SPL:54.757|MUS:12.678|LIV:18.981|KID:NA|PIT:27.482	FAT:9.521|ADR:9.548|LUN:NA|HTH:9.883|SPL:10.717|MUS:9.461|LIV:9.297|KID:9.557|PIT:9.449	TRUE	TRUE
RACK7	cluster_D	RACK7 27058665 Chip-Seq MCF-7 Human	8/1679	0.0165042	0.120519	2.736	11.23	DUSP4;EFNA1;DBP;SEMA6A;DAPK2;IRF1;PDE4B;ASB2	top85	FALSE	ZMYND8	FAT:36.191|ADR:100.545|LUN:40.548|HTH:50.521|SPL:65.392|MUS:27.004|LIV:19.02|KID:NA|PIT:98.828	FAT:11.329|ADR:12.162|LUN:NA|HTH:12.801|SPL:12.644|MUS:11.137|LIV:11.182|KID:11.94|PIT:13.392	TRUE	TRUE
OLIG2	cluster_D	OLIG2 23332759 ChIP-Seq OLIGODENDROCYTES Mouse	8/1679	0.0165042	0.120519	2.736	11.23	DUSP4;RNF144A;FGF7;CD83;PDE4B;CCR5;RASGRP1;RASGRP3	top86	FALSE	OLIG2	FAT:NA|ADR:NA|LUN:NA|HTH:46.407|SPL:NA|MUS:NA|LIV:NA|KID:NA|PIT:NA	FAT:7.909|ADR:7.713|LUN:NA|HTH:8.148|SPL:7.661|MUS:7.631|LIV:7.886|KID:7.631|PIT:7.497	FALSE	TRUE
ELK3	cluster_D	ELK3 25401928 ChIP-Seq HUVEC Human	8/1689	0.0170554	0.123113	2.718	11.068	EFNA1;DBP;SOX18;IRF1;BHLHE40;NRARP;PLEKHO2;SOX7	top87	FALSE	ELK3	FAT:83.186|ADR:27.237|LUN:53.614|HTH:11.362|SPL:53.823|MUS:NA|LIV:NA|KID:NA|PIT:18.901	FAT:10.992|ADR:11.359|LUN:NA|HTH:9.545|SPL:11.511|MUS:10.695|LIV:10.352|KID:10.64|PIT:11.121	TRUE	TRUE
JARID2	cluster_D	JARID2 20075857 ChIP-Seq MESCs Mouse	6/1055	0.0175417	0.125184	3.181	12.863	DUSP4;CD83;SEMA6A;SOX18;LMO2;MEOX2	top88	FALSE	JARID2	FAT:23.939|ADR:16.58|LUN:30.197|HTH:18.029|SPL:41.324|MUS:22.091|LIV:NA|KID:NA|PIT:19.715	FAT:7.759|ADR:7.657|LUN:NA|HTH:7.544|SPL:7.743|MUS:7.607|LIV:7.645|KID:7.693|PIT:7.596	FALSE	FALSE
STAT3	cluster_D	STAT3 24763339 ChIP-Seq IMN-ESCs Mouse	7/1398	0.0195965	0.138277	2.832	11.135	EFNA1;FGF7;CD83;SEMA6A;DAPK2;BHLHE40;PCDH12	top89	TRUE	STAT3	FAT:340.576|ADR:211.046|LUN:379.986|HTH:84.265|SPL:245.921|MUS:202.483|LIV:253.363|KID:NA|PIT:215.108	FAT:11.883|ADR:11.373|LUN:NA|HTH:10.396|SPL:11.569|MUS:11.368|LIV:11.861|KID:11.161|PIT:11.776	TRUE	TRUE
LMO2	cluster_D	LMO2 26923725 Chip-Seq HEMANGIOBLAST Mouse	7/1404	0.0200163	0.139669	2.819	11.024	RNF144A;CD83;SEMA6A;CLEC7A;IL1B;APLNR;IFIT3	top90	FALSE	LMO2	FAT:24.274|ADR:12.937|LUN:41.635|HTH:31.271|SPL:41.595|MUS:20.416|LIV:NA|KID:NA|PIT:29.506	FAT:11.063|ADR:11.887|LUN:NA|HTH:11.308|SPL:14.235|MUS:10.811|LIV:10.227|KID:10.9|PIT:11.715	FALSE	TRUE
HTT	cluster_D	HTT 18923047 ChIP-ChIP STHdh Human	3/304	0.0227027	0.156673	5.296	20.045	LMO2;MEOX2;RASGRP3	top91	FALSE	HTT	FAT:68.165|ADR:82.118|LUN:111.136|HTH:60.484|SPL:116.761|MUS:71.641|LIV:45.125|KID:NA|PIT:102.018	FAT:8.485|ADR:8.479|LUN:NA|HTH:8.493|SPL:8.769|MUS:8.245|LIV:8.619|KID:8.932|PIT:8.205	TRUE	TRUE
RCOR3	cluster_D	RCOR3 21632747 ChIP-Seq MESCs Mouse	9/2142	0.0231865	0.158273	2.426	9.134	ESM1;CD83;CYTH4;SOX18;LMO2;NRARP;ASB2;RASGRP1;RASGRP3	top92	FALSE	RCOR3	FAT:38.167|ADR:39.321|LUN:48.018|HTH:32.663|SPL:59.228|MUS:71.926|LIV:24.959|KID:NA|PIT:56.883	FAT:8.203|ADR:8.122|LUN:NA|HTH:8.214|SPL:8.106|MUS:8.954|LIV:8.41|KID:8.511|PIT:8.122	TRUE	TRUE
BACH1	cluster_D	BACH1 22875853 ChIP-PCR HELA AND SCP4 Human	6/1127	0.0234749	0.158519	2.966	11.127	EFNA1;MMP13;CLEC7A;DAPK2;IL1B;TNFSF10	top93	FALSE	BACH1	FAT:39.68|ADR:20.115|LUN:57.459|HTH:11.44|SPL:37.866|MUS:46.595|LIV:21.027|KID:NA|PIT:13.834	FAT:8.168|ADR:7.955|LUN:NA|HTH:8.035|SPL:8.245|MUS:9.01|LIV:9.495|KID:8.795|PIT:8.192	TRUE	TRUE
EBNA2	cluster_D	EBNA2 21746931 ChIP-Seq IB4-LCL Human	6/1137	0.024395	0.16298	2.938	10.91	CD274;BHLHE40;MRGPRF;NRARP;SIRPB1;IFIT3	top94	FALSE	EBNA2	FAT:NA|ADR:NA|LUN:NA|HTH:NA|SPL:NA|MUS:NA|LIV:NA|KID:NA|PIT:NA	FAT:NA|ADR:NA|LUN:NA|HTH:NA|SPL:NA|MUS:NA|LIV:NA|KID:NA|PIT:NA	FALSE	FALSE
PU.1	cluster_D	PU.1 20176806 ChIP-Seq MACROPHAGES Mouse	7/1469	0.0249812	0.164958	2.684	9.902	DUSP4;CYTH4;LBH;SOX18;CCL4;NRARP;S1PR2	top95	FALSE	SPI1	FAT:28.676|ADR:15.336|LUN:89.426|HTH:NA|SPL:150.697|MUS:NA|LIV:NA|KID:NA|PIT:NA	FAT:8.215|ADR:7.821|LUN:NA|HTH:7.698|SPL:9.182|MUS:7.894|LIV:8.12|KID:7.953|PIT:7.707	TRUE	TRUE
RARG	cluster_D	RARG 19884340 ChIP-ChIP MEFs Mouse	3/317	0.0252996	0.164958	5.073	18.653	DUSP4;EFNA1;MRGPRF	top96	TRUE	RARG	FAT:30.244|ADR:27.532|LUN:30.323|HTH:NA|SPL:19.71|MUS:NA|LIV:NA|KID:NA|PIT:19.228	FAT:8.817|ADR:8.53|LUN:NA|HTH:8.04|SPL:8.445|MUS:8.664|LIV:8.447|KID:8.364|PIT:8.738	FALSE	TRUE
GFI1B	cluster_D	GFI1B 20887958 ChIP-Seq HPC-7 Mouse	7/1475	0.0254792	0.164958	2.672	9.806	DUSP4;EFNA1;CD274;LBH;IRF1;LMO2;BHLHE40	top97	FALSE	GFI1B	FAT:NA|ADR:NA|LUN:NA|HTH:NA|SPL:NA|MUS:NA|LIV:NA|KID:NA|PIT:NA	FAT:7.763|ADR:7.62|LUN:NA|HTH:7.987|SPL:10.855|MUS:7.822|LIV:7.656|KID:7.922|PIT:7.663	FALSE	TRUE
ZFX	cluster_D	ZFX 18555785 Chip-Seq ESCs Mouse	7/1485	0.0263245	0.168692	2.653	9.648	FGF7;SOX18;IL1B;LMO2;TNFSF10;NRARP;RASGRP1	top98	FALSE	ZFX	FAT:33.391|ADR:22.191|LUN:30.381|HTH:13.878|SPL:36.307|MUS:29.547|LIV:18.069|KID:NA|PIT:27.387	FAT:10.641|ADR:10.895|LUN:NA|HTH:10.194|SPL:11.107|MUS:10.581|LIV:10.335|KID:10.373|PIT:10.798	FALSE	TRUE
RNF2	cluster_D	RNF2 16625203 ChIP-ChIP MESCs Mouse	5/854	0.026809	0.170061	3.216	11.638	DUSP4;SEMA6A;SOX18;MEOX2;SOX7	top99	FALSE	RNF2	FAT:13.207|ADR:NA|LUN:NA|HTH:NA|SPL:10.627|MUS:NA|LIV:NA|KID:NA|PIT:10.029	FAT:8.731|ADR:8.541|LUN:NA|HTH:8.114|SPL:8.265|MUS:8.239|LIV:8.294|KID:8.305|PIT:8.166	FALSE	TRUE
P300	cluster_D	P300 18555785 Chip-Seq ESCs Mouse	7/1499	0.0275406	0.172235	2.626	9.432	FGF7;SOX18;IL1B;LMO2;APLNR;NRARP;RASGRP1	top100	FALSE	EP300	FAT:87.236|ADR:84.403|LUN:99.516|HTH:39.487|SPL:102.572|MUS:66.52|LIV:39.612|KID:NA|PIT:102.474	FAT:10.178|ADR:10.392|LUN:NA|HTH:10.485|SPL:10.701|MUS:10.413|LIV:9.864|KID:10.087|PIT:10.444	TRUE	TRUE
EBF1	cluster_D	EBF1 22473956 ChIP-Seq BONE MARROW Mouse	7/1502	0.0278062	0.172235	2.62	9.386	FGF7;IL1B;LMO2;BHLHE40;TNFSF10;NRARP;RASGRP1	top101	FALSE	EBF1	FAT:70.675|ADR:NA|LUN:15.444|HTH:NA|SPL:16.021|MUS:NA|LIV:NA|KID:NA|PIT:NA	FAT:9.798|ADR:9.314|LUN:NA|HTH:8.121|SPL:8.034|MUS:8.784|LIV:7.831|KID:8.254|PIT:8.052	TRUE	TRUE
KLF4	cluster_D	KLF4 25985364 ChIP-Seq ATHEROSCLEROSIS LESION Mouse	5/865	0.0281326	0.172235	3.173	11.329	FGF7;DAPK2;IL1B;LMO2;CCR5	top102	FALSE	KLF4	FAT:222.672|ADR:32.645|LUN:183.608|HTH:11.975|SPL:80.849|MUS:23.755|LIV:NA|KID:NA|PIT:22.653	FAT:10.572|ADR:8.77|LUN:NA|HTH:8.333|SPL:8.737|MUS:9.745|LIV:8.333|KID:8.912|PIT:8.471	TRUE	TRUE
SUZ12	cluster_D	SUZ12 18555785 ChIP-Seq MESCs Mouse	5/866	0.0282549	0.172235	3.169	11.302	DUSP4;LBH;SEMA6A;SOX18;SOX7	top103	FALSE	SUZ12	FAT:26.121|ADR:25.605|LUN:30.633|HTH:15.493|SPL:35.385|MUS:12.387|LIV:15.423|KID:NA|PIT:23.595	FAT:11.658|ADR:11.925|LUN:NA|HTH:11.585|SPL:12.494|MUS:11.249|LIV:11.418|KID:11.83|PIT:11.709	FALSE	TRUE
PU1	cluster_D	PU1 27457419 Chip-Seq LIVER Mouse	7/1510	0.028523	0.172235	2.605	9.266	FGF7;SOX18;IL1B;LMO2;APLNR;NRARP;RASGRP1	top104	FALSE	SPI1	FAT:28.676|ADR:15.336|LUN:89.426|HTH:NA|SPL:150.697|MUS:NA|LIV:NA|KID:NA|PIT:NA	FAT:8.215|ADR:7.821|LUN:NA|HTH:7.698|SPL:9.182|MUS:7.894|LIV:8.12|KID:7.953|PIT:7.707	TRUE	TRUE
ESR1	cluster_D	ESR1 22446102 ChIP-Seq UTERUS Mouse	6/1183	0.0289441	0.172764	2.816	9.976	RNF144A;IL33;CD83;LBH;SEMA6A;TNFSF10	top105	TRUE	ESR1	FAT:NA|ADR:NA|LUN:NA|HTH:NA|SPL:NA|MUS:NA|LIV:22.157|KID:NA|PIT:30.934	FAT:10.582|ADR:9.21|LUN:NA|HTH:8.576|SPL:8.057|MUS:10.453|LIV:9.665|KID:9.386|PIT:11.323	FALSE	TRUE
LMO2	cluster_D	LMO2 26923725 Chip-Seq HEMOGENIC-ENDOTHELIUM Mouse	7/1517	0.0291607	0.172764	2.592	9.162	DUSP4;CD83;LBH;CLEC7A;IL1B;APLNR;IFIT3	top106	FALSE	LMO2	FAT:24.274|ADR:12.937|LUN:41.635|HTH:31.271|SPL:41.595|MUS:20.416|LIV:NA|KID:NA|PIT:29.506	FAT:11.063|ADR:11.887|LUN:NA|HTH:11.308|SPL:14.235|MUS:10.811|LIV:10.227|KID:10.9|PIT:11.715	FALSE	TRUE
E2F1	cluster_D	E2F1 18555785 Chip-Seq ESCs Mouse	7/1528	0.0301826	0.177146	2.572	9.002	FGF7;IL1B;LMO2;PDE4B;APLNR;NRARP;RASGRP1	top107	FALSE	E2F1	FAT:NA|ADR:NA|LUN:NA|HTH:NA|SPL:NA|MUS:NA|LIV:NA|KID:NA|PIT:NA	FAT:9.432|ADR:9.6|LUN:NA|HTH:8.879|SPL:11.256|MUS:8.768|LIV:9.235|KID:9.057|PIT:9.51	FALSE	TRUE
FLI1	cluster_D	FLI1 20887958 ChIP-Seq HPC-7 Mouse	7/1534	0.0307502	0.178807	2.561	8.916	CD274;CD52;DBP;CYTH4;LBH;IRF1;CCL4	top108	FALSE	FLI1	FAT:50.55|ADR:NA|LUN:69.071|HTH:10.259|SPL:154.592|MUS:NA|LIV:NA|KID:NA|PIT:NA	FAT:8.196|ADR:8.497|LUN:NA|HTH:7.802|SPL:9.203|MUS:8.126|LIV:8.048|KID:7.835|PIT:7.668	TRUE	TRUE
JUN	cluster_D	JUN 21703547 ChIP-Seq K562 Human	6/1206	0.0314187	0.181018	2.759	9.547	CD52;ESM1;LBH;MRGPRF;PDE4B;RASGRP3	top109	FALSE	JUN	FAT:741.753|ADR:134.486|LUN:475.269|HTH:104.639|SPL:93.818|MUS:132.973|LIV:235.473|KID:NA|PIT:193.036	FAT:9.691|ADR:11.441|LUN:NA|HTH:9.247|SPL:8.84|MUS:10.016|LIV:8.916|KID:9.349|PIT:8.521	TRUE	TRUE
NFI	cluster_D	NFI 21473784 ChIP-Seq ESCs Mouse	7/1549	0.0322014	0.183841	2.534	8.705	IL33;FGF7;LBH;MMP13;SOX18;S1PR2;SOX7	top110	FALSE	NFIA/NFIB/NFIC/NFIX	FAT:NA|ADR:NA|LUN:NA|HTH:NA|SPL:NA|MUS:NA|LIV:NA|KID:NA|PIT:NA	FAT:NA|ADR:NA|LUN:NA|HTH:NA|SPL:NA|MUS:NA|LIV:NA|KID:NA|PIT:NA	FALSE	FALSE
RUNX1	cluster_D	RUNX1 27514584 Chip-Seq MCF-7 Human	7/1568	0.034106	0.1924	2.5	8.446	EFNA1;RNF144A;LBH;DAPK2;BHLHE40;ASB2;RASGRP1	top111	FALSE	RUNX1	FAT:59.245|ADR:14.442|LUN:91.415|HTH:NA|SPL:44.823|MUS:39.807|LIV:13.6|KID:NA|PIT:25.275	FAT:7.769|ADR:7.977|LUN:NA|HTH:7.835|SPL:8.629|MUS:7.763|LIV:7.794|KID:7.745|PIT:7.75	TRUE	TRUE
PU	cluster_D	PU 27001747 Chip-Seq BMDM Mouse	7/1573	0.0346197	0.1924	2.492	8.38	ESM1;IRF1;CCL4;BHLHE40;NRARP;SOX7;IFIT3	top112	FALSE	SPI1	FAT:28.676|ADR:15.336|LUN:89.426|HTH:NA|SPL:150.697|MUS:NA|LIV:NA|KID:NA|PIT:NA	FAT:8.215|ADR:7.821|LUN:NA|HTH:7.698|SPL:9.182|MUS:7.894|LIV:8.12|KID:7.953|PIT:7.707	TRUE	TRUE
BCOR	cluster_D	BCOR 27268052 Chip-Seq Bcells Human	7/1573	0.0346197	0.1924	2.492	8.38	RNF144A;CLEC7A;DAPK2;IRF1;BHLHE40;APLNR;RASGRP1	top113	FALSE	BCOR	FAT:28.127|ADR:34.127|LUN:36.254|HTH:11.341|SPL:28.474|MUS:32.466|LIV:16.56|KID:NA|PIT:36.692	FAT:8.71|ADR:8.999|LUN:NA|HTH:8.804|SPL:9.982|MUS:8.67|LIV:9.014|KID:8.763|PIT:9.019	FALSE	TRUE
LXR	cluster_D	LXR 22158963 ChIP-Seq LIVER Mouse	7/1578	0.0351386	0.19285	2.483	8.314	EFNA1;DBP;DAPK2;BHLHE40;TNFSF10;APLNR;ASB2	top114	TRUE	NR1H3	FAT:85.357|ADR:27.267|LUN:41.438|HTH:NA|SPL:91.42|MUS:NA|LIV:61.118|KID:NA|PIT:13.787	FAT:12.356|ADR:10.386|LUN:NA|HTH:8.746|SPL:12.001|MUS:10.815|LIV:12.363|KID:11.505|PIT:9.269	TRUE	TRUE
BP1	cluster_D	BP1 19119308 ChIP-ChIP Hs578T Human	1/18	0.0354091	0.19285	30.08	100.491	CCL4	top115	FALSE	DLX4	FAT:NA|ADR:NA|LUN:NA|HTH:NA|SPL:NA|MUS:NA|LIV:NA|KID:NA|PIT:NA	FAT:7.631|ADR:7.542|LUN:NA|HTH:7.608|SPL:7.531|MUS:7.6|LIV:7.47|KID:7.558|PIT:7.515	FALSE	FALSE
EED	cluster_D	EED 16625203 ChIP-ChIP MESCs Mouse	4/628	0.0360567	0.19285	3.443	11.44	SEMA6A;SOX18;MEOX2;SOX7	top116	FALSE	EED	FAT:15.355|ADR:12.821|LUN:17.545|HTH:11.061|SPL:24.807|MUS:NA|LIV:NA|KID:NA|PIT:18.219	FAT:10.395|ADR:10.247|LUN:NA|HTH:9.104|SPL:10.014|MUS:10.241|LIV:9.981|KID:9.612|PIT:10.049	FALSE	TRUE
GATA3	cluster_D	GATA3 22897851 ChIP-Seq JUKARTE6-1 Human	7/1587	0.0360859	0.19285	2.468	8.197	SEMA6A;CLEC7A;LMO2;BHLHE40;PLEKHO2;SIRPB1;IFIT3	top117	FALSE	GATA3	FAT:NA|ADR:NA|LUN:NA|HTH:NA|SPL:12.747|MUS:NA|LIV:NA|KID:NA|PIT:11.306	FAT:8.584|ADR:9.672|LUN:NA|HTH:7.831|SPL:8.586|MUS:7.963|LIV:7.818|KID:9.487|PIT:7.671	FALSE	TRUE
RUNX1	cluster_D	RUNX1 26923725 Chip-Seq HPCs Mouse	4/629	0.0362361	0.19285	3.437	11.404	RNF144A;IL1B;TNFSF10;CCR5	top118	FALSE	RUNX1	FAT:59.245|ADR:14.442|LUN:91.415|HTH:NA|SPL:44.823|MUS:39.807|LIV:13.6|KID:NA|PIT:25.275	FAT:7.769|ADR:7.977|LUN:NA|HTH:7.835|SPL:8.629|MUS:7.763|LIV:7.794|KID:7.745|PIT:7.75	TRUE	TRUE
E2A	cluster_D	E2A 27217539 Chip-Seq RAMOS-Cell Line Human	7/1603	0.0378125	0.19718	2.441	7.994	CYTH4;LMO2;NRARP;RASGRP1;IFIT3;RASGRP3;APOL2	top119	FALSE	TCF3	FAT:37.392|ADR:27.074|LUN:47.17|HTH:17.894|SPL:109.8|MUS:17.581|LIV:15.964|KID:NA|PIT:49.291	FAT:8.04|ADR:8.07|LUN:NA|HTH:7.96|SPL:8.32|MUS:7.733|LIV:7.841|KID:7.764|PIT:7.864	TRUE	TRUE
NCOR	cluster_D	NCOR 22465074 ChIP-Seq MACROPHAGES Mouse	7/1604	0.0379222	0.19718	2.439	7.981	CD52;CXCL10;MMP13;IRF1;CCL4;BHLHE40;PLEKHO2	top120	FALSE	NCOR1	FAT:87.699|ADR:72.679|LUN:97.751|HTH:60.418|SPL:89.867|MUS:82.256|LIV:56.268|KID:NA|PIT:100.005	FAT:11.65|ADR:11.615|LUN:NA|HTH:11.32|SPL:12.006|MUS:11.846|LIV:11.382|KID:11.829|PIT:11.923	TRUE	TRUE
TCF4	cluster_D	TCF4 18268006 ChIP-ChIP LS174T Human	3/372	0.0379917	0.19718	4.305	14.078	EFNA1;LBH;RASGRP3	top121	FALSE	TCF4	FAT:174.247|ADR:84.256|LUN:155.473|HTH:55.951|SPL:79.199|MUS:37.905|LIV:10.56|KID:NA|PIT:71.782	FAT:12.504|ADR:13.742|LUN:NA|HTH:13.18|SPL:13.296|MUS:12.831|LIV:11.435|KID:12.227|PIT:13.745	TRUE	TRUE
SMAD2/3	cluster_D	SMAD2/3 21741376 ChIP-Seq ESCs Human	7/1612	0.0388078	0.199764	2.426	7.882	DAPK2;IRF1;MRGPRF;APLNR;PCDH12;PLEKHO2;APOL2	top122	FALSE	SMAD3	FAT:109.688|ADR:24.531|LUN:90.385|HTH:21.12|SPL:69.085|MUS:97.914|LIV:42.992|KID:NA|PIT:69.959	FAT:10.912|ADR:11.258|LUN:NA|HTH:10.262|SPL:11.127|MUS:12.152|LIV:10.247|KID:11.133|PIT:11.284	TRUE	TRUE
PPARG	cluster_D	PPARG 20176806 ChIP-Seq THIOMACROPHAGE Mouse	4/645	0.0391782	0.199952	3.349	10.849	FGF7;CYTH4;PLEKHO2;ASB2	top123	TRUE	PPARG	FAT:126.709|ADR:NA|LUN:22.652|HTH:NA|SPL:13.807|MUS:NA|LIV:NA|KID:NA|PIT:NA	FAT:13.372|ADR:11.26|LUN:NA|HTH:7.99|SPL:9.888|MUS:9.47|LIV:9.801|KID:8.222|PIT:7.832	TRUE	TRUE
GATA2	cluster_D	GATA2 19941826 ChIP-Seq K562 Human	7/1618	0.039481	0.199952	2.416	7.808	CD52;CD83;LBH;LMO2;TNFSF10;RASGRP1;SOX7	top124	FALSE	GATA2	FAT:27.196|ADR:NA|LUN:85.161|HTH:NA|SPL:28.334|MUS:NA|LIV:NA|KID:NA|PIT:24.818	FAT:9.421|ADR:11.858|LUN:NA|HTH:9.086|SPL:9.99|MUS:9.922|LIV:8.806|KID:10.79|PIT:12.158	TRUE	TRUE
JARID2	cluster_D	JARID2 20064375 ChIP-Seq MESCs Mouse	5/951	0.0399369	0.200628	2.871	9.247	CD83;SEMA6A;SOX18;LMO2;SOX7	top125	FALSE	JARID2	FAT:23.939|ADR:16.58|LUN:30.197|HTH:18.029|SPL:41.324|MUS:22.091|LIV:NA|KID:NA|PIT:19.715	FAT:7.759|ADR:7.657|LUN:NA|HTH:7.544|SPL:7.743|MUS:7.607|LIV:7.645|KID:7.693|PIT:7.596	FALSE	FALSE
MAF	cluster_D	MAF 26560356 Chip-Seq TH2 Human	7/1627	0.0405054	0.200628	2.401	7.7	RNF144A;CD52;CYTH4;ASB2;SIRPB1;IFIT3;RASGRP3	top126	FALSE	MAF	FAT:116.019|ADR:42.349|LUN:84.55|HTH:21.619|SPL:103.027|MUS:54.328|LIV:52.069|KID:NA|PIT:25.575	FAT:9.088|ADR:9.113|LUN:NA|HTH:8.422|SPL:9.91|MUS:11.156|LIV:9.998|KID:11.44|PIT:8.071	TRUE	TRUE
GATA3	cluster_D	GATA3 24758297 ChIP-Seq MCF-7 Human	7/1629	0.0407354	0.200628	2.398	7.676	EFNA1;LBH;SEMA6A;IRF1;BHLHE40;CCR5;SOX7	top127	FALSE	GATA3	FAT:NA|ADR:NA|LUN:NA|HTH:NA|SPL:12.747|MUS:NA|LIV:NA|KID:NA|PIT:11.306	FAT:8.584|ADR:9.672|LUN:NA|HTH:7.831|SPL:8.586|MUS:7.963|LIV:7.818|KID:9.487|PIT:7.671	FALSE	TRUE
GATA1	cluster_D	GATA1 19941826 ChIP-Seq K562 Human	4/654	0.0408923	0.200628	3.301	10.552	CD83;LBH;LMO2;SOX7	top128	FALSE	GATA1	FAT:NA|ADR:NA|LUN:NA|HTH:NA|SPL:NA|MUS:NA|LIV:NA|KID:NA|PIT:NA	FAT:8.188|ADR:8.019|LUN:NA|HTH:7.797|SPL:9.354|MUS:7.96|LIV:7.701|KID:7.752|PIT:7.831	FALSE	TRUE
FOXA1	cluster_D	FOXA1 21915096 ChIP-Seq LNCaP-1F5 Human	7/1641	0.042134	0.205118	2.379	7.534	DUSP4;EFNA1;SEMA6A;IRF1;TNFSF10;NRARP;APOL2	top129	FALSE	FOXA1	FAT:NA|ADR:NA|LUN:10.206|HTH:NA|SPL:NA|MUS:NA|LIV:26.34|KID:NA|PIT:NA	FAT:8.405|ADR:8.473|LUN:NA|HTH:8.791|SPL:8.254|MUS:8.767|LIV:10.482|KID:8.133|PIT:7.865	FALSE	TRUE
EZH2	cluster_D	EZH2 27294783 Chip-Seq ESCs Mouse	7/1649	0.043084	0.207689	2.366	7.441	DUSP4;RNF144A;CD83;LBH;SEMA6A;NRARP;SOX7	top130	FALSE	EZH2	FAT:NA|ADR:NA|LUN:10.854|HTH:NA|SPL:17.294|MUS:NA|LIV:NA|KID:NA|PIT:NA	FAT:8.677|ADR:8.665|LUN:NA|HTH:8.642|SPL:10.198|MUS:8.543|LIV:8.721|KID:8.742|PIT:8.232	FALSE	TRUE
RING1B	cluster_D	RING1B 27294783 Chip-Seq ESCs Mouse	7/1651	0.0433237	0.207689	2.363	7.418	DUSP4;IL33;SEMA6A;BHLHE40;PLEKHO2;MEOX2;SOX7	top131	FALSE	RING1	FAT:43.579|ADR:45.316|LUN:48.936|HTH:41.288|SPL:50.382|MUS:21.29|LIV:30.618|KID:NA|PIT:108.14	FAT:9.837|ADR:11.22|LUN:NA|HTH:10.87|SPL:10.435|MUS:10.191|LIV:9.856|KID:10.3|PIT:10.647	TRUE	TRUE
KDM2B	cluster_D	KDM2B 26808549 Chip-Seq DND41 Human	7/1657	0.0440481	0.209562	2.354	7.35	EFNA1;RNF144A;DBP;SOX18;BHLHE40;MRGPRF;IFIT3	top132	FALSE	KDM2B	FAT:24.795|ADR:18.857|LUN:36.24|HTH:19.149|SPL:54.757|MUS:12.678|LIV:18.981|KID:NA|PIT:27.482	FAT:9.521|ADR:9.548|LUN:NA|HTH:9.883|SPL:10.717|MUS:9.461|LIV:9.297|KID:9.557|PIT:9.449	TRUE	TRUE
MYCN	cluster_D	MYCN 19997598 ChIP-ChIP NEUROBLASTOMA Human	2/169	0.0449021	0.212019	6.238	19.358	PCDH12;MEOX2	top133	FALSE	MYCN	FAT:NA|ADR:NA|LUN:NA|HTH:NA|SPL:NA|MUS:NA|LIV:NA|KID:NA|PIT:NA	FAT:7.601|ADR:7.639|LUN:NA|HTH:7.484|SPL:7.449|MUS:7.403|LIV:7.505|KID:7.536|PIT:7.535	FALSE	FALSE
ELF3	cluster_D	ELF3 26769127 Chip-Seq PDAC-Cell Line Human	7/1680	0.0468991	0.219796	2.319	7.094	EFNA1;RNF144A;LMO2;BHLHE40;PLEKHO2;ASB2;IFIT3	top134	FALSE	ELF3	FAT:NA|ADR:NA|LUN:167.3|HTH:NA|SPL:NA|MUS:NA|LIV:100.377|KID:NA|PIT:11.752	FAT:8.003|ADR:8.041|LUN:NA|HTH:8.011|SPL:8.076|MUS:8.206|LIV:8.041|KID:9.266|PIT:8.664	TRUE	TRUE
SALL4	cluster_D	SALL4 18804426 ChIP-ChIP XEN Mouse	4/693	0.0488141	0.227076	3.108	9.385	EFNA1;FGF7;MMP13;SOX7	top135	FALSE	SALL4	FAT:NA|ADR:NA|LUN:NA|HTH:NA|SPL:NA|MUS:NA|LIV:NA|KID:NA|PIT:NA	FAT:7.763|ADR:7.658|LUN:NA|HTH:7.717|SPL:7.779|MUS:8.493|LIV:7.63|KID:7.763|PIT:7.721	FALSE	TRUE
CEBPD	cluster_D	CEBPD 23245923 ChIP-Seq MEFs Mouse	3/413	0.0492181	0.227272	3.866	11.643	IL33;FGF7;BHLHE40	top136	FALSE	CEBPD	FAT:327.483|ADR:88.103|LUN:221.259|HTH:36.354|SPL:155.305|MUS:95.252|LIV:140.356|KID:NA|PIT:180.382	FAT:7.564|ADR:7.582|LUN:NA|HTH:7.464|SPL:7.631|MUS:7.724|LIV:7.564|KID:7.568|PIT:7.723	TRUE	FALSE

## Sheet: E
Gene expression changes in cluster E occur in the following tissues: KID.
TF	cluster	Term	Overlap	P.value	Adjusted.P.value	Odds.Ratio	Combined.Score	Genes	TF_rank	nuclear_receptors	mapped_name	tissue_cpm_gtex	tissue_log2_microarray	pattern_tissue_colocalization_gtex	pattern_tissue_colocalization_microarray
FOXO1	cluster_E	FOXO1 23066095 ChIP-Seq LIVER Mouse	2/276	0.00380658	0.522809	28.787	160.372	SLC22A23;CYP24A1	top1	FALSE	FOXO1	FAT:104.15|ADR:28.44|LUN:68.138|HTH:13.875|SPL:40.232|MUS:178.519|LIV:28.209|KID:NA|PIT:32.602	FAT:10.462|ADR:9.696|LUN:NA|HTH:9.256|SPL:10.657|MUS:10.051|LIV:10.275|KID:10.062|PIT:10.193	TRUE	TRUE
RCOR1	cluster_E	RCOR1 19997604 ChIP-ChIP NEURONS Mouse	3/1095	0.00485017	0.522809	12.981	69.175	SUCNR1;PHLDA2;SAP30	top2	FALSE	RCOR1	FAT:33.001|ADR:20.668|LUN:52.538|HTH:10.908|SPL:31.997|MUS:22.971|LIV:16.925|KID:NA|PIT:22.703	FAT:9.049|ADR:9.448|LUN:NA|HTH:8.474|SPL:9.465|MUS:8.838|LIV:9.318|KID:9.837|PIT:9.139	TRUE	TRUE
RUNX1	cluster_E	RUNX1 22412390 ChIP-Seq EML Mouse	3/1561	0.0130763	0.522809	8.874	38.488	SLC22A23;SUCNR1;SAP30	top3	FALSE	RUNX1	FAT:59.245|ADR:14.442|LUN:91.415|HTH:NA|SPL:44.823|MUS:39.807|LIV:13.6|KID:NA|PIT:25.275	FAT:7.769|ADR:7.977|LUN:NA|HTH:7.835|SPL:8.629|MUS:7.763|LIV:7.794|KID:7.745|PIT:7.75	TRUE	TRUE
REST	cluster_E	REST 21632747 ChIP-Seq MESCs Mouse	3/1765	0.0183078	0.522809	7.76	31.044	SLC22A23;SUCNR1;SAP30	top4	FALSE	REST	FAT:23.732|ADR:23.018|LUN:23.858|HTH:NA|SPL:27.747|MUS:12.798|LIV:14.528|KID:NA|PIT:NA	FAT:7.646|ADR:7.567|LUN:NA|HTH:7.434|SPL:7.565|MUS:7.498|LIV:7.599|KID:7.676|PIT:7.433	FALSE	FALSE
EED	cluster_E	EED 16625203 ChIP-ChIP MESCs Mouse	2/628	0.0186146	0.522809	12.375	49.3	CYP24A1;PHLDA2	top5	FALSE	EED	FAT:15.355|ADR:12.821|LUN:17.545|HTH:11.061|SPL:24.807|MUS:NA|LIV:NA|KID:NA|PIT:18.219	FAT:10.395|ADR:10.247|LUN:NA|HTH:9.104|SPL:10.014|MUS:10.241|LIV:9.981|KID:9.612|PIT:10.049	FALSE	TRUE
PHC1	cluster_E	PHC1 16625203 ChIP-ChIP MESCs Mouse	2/700	0.0228525	0.522809	11.057	41.782	CYP24A1;PHLDA2	top6	FALSE	PHC1	FAT:30.846|ADR:28.472|LUN:38.457|HTH:28.4|SPL:46.5|MUS:12.695|LIV:NA|KID:NA|PIT:100.682	FAT:10.402|ADR:10.458|LUN:NA|HTH:11.142|SPL:10.265|MUS:10.665|LIV:9.103|KID:11.149|PIT:11.411	TRUE	TRUE
SOX2	cluster_E	SOX2 21211035 ChIP-Seq GBM Human Brain Glioblastoma	1/82	0.0283534	0.522809	40.971	145.981	PHLDA2	top7	FALSE	SOX2	FAT:NA|ADR:NA|LUN:NA|HTH:64.448|SPL:NA|MUS:NA|LIV:NA|KID:NA|PIT:25.59	FAT:8.007|ADR:7.668|LUN:NA|HTH:9.112|SPL:7.868|MUS:7.815|LIV:8.148|KID:7.91|PIT:8.309	TRUE	TRUE
SMARCA4	cluster_E	SMARCA4 23332759 ChIP-Seq OLIGODENDROCYTES Mouse	3/2089	0.0288381	0.522809	6.438	22.831	SLC22A23;SUCNR1;CYP24A1	top8	FALSE	SMARCA4	FAT:65.566|ADR:82.137|LUN:92.273|HTH:81.139|SPL:86.956|MUS:56.577|LIV:31.814|KID:NA|PIT:103.98	FAT:9.079|ADR:9.042|LUN:NA|HTH:9.104|SPL:9.6|MUS:9.105|LIV:9.021|KID:8.751|PIT:9.377	TRUE	TRUE
ERG	cluster_E	ERG 20517297 ChIP-Seq VCAP Human	2/853	0.0330775	0.522809	8.997	30.671	CYP24A1;PHLDA2	top9	FALSE	ERG	FAT:61.438|ADR:11.512|LUN:61.424|HTH:NA|SPL:71.271|MUS:NA|LIV:NA|KID:NA|PIT:NA	FAT:7.759|ADR:7.754|LUN:NA|HTH:7.722|SPL:7.695|MUS:7.604|LIV:7.832|KID:7.906|PIT:7.64	TRUE	FALSE
RNF2	cluster_E	RNF2 16625203 ChIP-ChIP MESCs Mouse	2/854	0.0331496	0.522809	8.986	30.614	CYP24A1;PHLDA2	top10	FALSE	RNF2	FAT:13.207|ADR:NA|LUN:NA|HTH:NA|SPL:10.627|MUS:NA|LIV:NA|KID:NA|PIT:10.029	FAT:8.731|ADR:8.541|LUN:NA|HTH:8.114|SPL:8.265|MUS:8.239|LIV:8.294|KID:8.305|PIT:8.166	FALSE	TRUE
SUZ12	cluster_E	SUZ12 18555785 ChIP-Seq MESCs Mouse	2/866	0.0340192	0.522809	8.856	29.941	CYP24A1;PHLDA2	top11	FALSE	SUZ12	FAT:26.121|ADR:25.605|LUN:30.633|HTH:15.493|SPL:35.385|MUS:12.387|LIV:15.423|KID:NA|PIT:23.595	FAT:11.658|ADR:11.925|LUN:NA|HTH:11.585|SPL:12.494|MUS:11.249|LIV:11.418|KID:11.83|PIT:11.709	FALSE	TRUE
TBX2	cluster_E	TBX2 33478486 ChIP-Seq IMR90 Human Lung	3/2354	0.0395536	0.522809	5.628	18.179	CYP24A1;ARHGEF39;EVPLL	top12	FALSE	TBX2	FAT:58.47|ADR:15.618|LUN:343.106|HTH:12.547|SPL:75.498|MUS:13.175|LIV:14.903|KID:NA|PIT:32.783	FAT:8.235|ADR:8.984|LUN:NA|HTH:7.879|SPL:7.762|MUS:8.094|LIV:7.961|KID:9.712|PIT:7.857	TRUE	TRUE
SUZ12	cluster_E	SUZ12 16625203 ChIP-ChIP MESCs Mouse	2/944	0.0398976	0.522809	8.09	26.06	CYP24A1;PHLDA2	top13	FALSE	SUZ12	FAT:26.121|ADR:25.605|LUN:30.633|HTH:15.493|SPL:35.385|MUS:12.387|LIV:15.423|KID:NA|PIT:23.595	FAT:11.658|ADR:11.925|LUN:NA|HTH:11.585|SPL:12.494|MUS:11.249|LIV:11.418|KID:11.83|PIT:11.709	FALSE	TRUE
JARID2	cluster_E	JARID2 20064375 ChIP-Seq MESCs Mouse	2/951	0.0404438	0.522809	8.027	25.749	SLC22A23;CYP24A1	top14	FALSE	JARID2	FAT:23.939|ADR:16.58|LUN:30.197|HTH:18.029|SPL:41.324|MUS:22.091|LIV:NA|KID:NA|PIT:19.715	FAT:7.759|ADR:7.657|LUN:NA|HTH:7.544|SPL:7.743|MUS:7.607|LIV:7.645|KID:7.693|PIT:7.596	FALSE	FALSE
MTF2	cluster_E	MTF2 20144788 ChIP-Seq MESCs Mouse	3/2488	0.0457047	0.522809	5.284	16.304	SLC22A23;CYP24A1;PHLDA2	top15	FALSE	MTF2	FAT:17.013|ADR:18.245|LUN:24.649|HTH:14.796|SPL:31.666|MUS:NA|LIV:NA|KID:NA|PIT:21.698	FAT:10.16|ADR:10.515|LUN:NA|HTH:11.086|SPL:11.677|MUS:10.578|LIV:10.223|KID:10.521|PIT:11.382	FALSE	TRUE
SUZ12	cluster_E	SUZ12 18692474 ChIP-Seq MEFs Mouse	2/1019	0.0459061	0.522809	7.464	22.996	CYP24A1;PHLDA2	top16	FALSE	SUZ12	FAT:26.121|ADR:25.605|LUN:30.633|HTH:15.493|SPL:35.385|MUS:12.387|LIV:15.423|KID:NA|PIT:23.595	FAT:11.658|ADR:11.925|LUN:NA|HTH:11.585|SPL:12.494|MUS:11.249|LIV:11.418|KID:11.83|PIT:11.709	FALSE	TRUE
VDR	cluster_E	VDR 24763502 ChIP-Seq THP-1 Human	2/1034	0.0471483	0.522809	7.349	22.448	SLC22A23;PHLDA2	top17	TRUE	VDR	FAT:NA|ADR:36.074|LUN:22.797|HTH:NA|SPL:NA|MUS:NA|LIV:NA|KID:NA|PIT:38.636	FAT:8.065|ADR:9.311|LUN:NA|HTH:7.969|SPL:8.289|MUS:8.253|LIV:8.305|KID:12.613|PIT:9.605	FALSE	TRUE
JARID2	cluster_E	JARID2 20075857 ChIP-Seq MESCs Mouse	2/1055	0.0489095	0.522809	7.195	21.712	SLC22A23;CYP24A1	top18	FALSE	JARID2	FAT:23.939|ADR:16.58|LUN:30.197|HTH:18.029|SPL:41.324|MUS:22.091|LIV:NA|KID:NA|PIT:19.715	FAT:7.759|ADR:7.657|LUN:NA|HTH:7.544|SPL:7.743|MUS:7.607|LIV:7.645|KID:7.693|PIT:7.596	FALSE	FALSE

## Sheet: F
Gene expression changes in cluster F occur in the following tissues: ADR, FAT, KID, LIV, PIT.
TF	cluster	Term	Overlap	P.value	Adjusted.P.value	Odds.Ratio	Combined.Score	Genes	TF_rank	nuclear_receptors	mapped_name	tissue_cpm_gtex	tissue_log2_microarray	pattern_tissue_colocalization_gtex	pattern_tissue_colocalization_microarray
NANOG	cluster_F	NANOG 21062744 ChIP-ChIP HESCs Human	4/654	0.000311164	0.109772	17.001	137.289	MARCKS;STAC2;DDIT4L;SSTR2	top1	FALSE	NANOG	FAT:NA|ADR:NA|LUN:NA|HTH:NA|SPL:NA|MUS:NA|LIV:NA|KID:NA|PIT:NA	FAT:7.604|ADR:7.544|LUN:NA|HTH:7.781|SPL:7.586|MUS:7.815|LIV:7.727|KID:7.692|PIT:7.534	FALSE	FALSE
ESR2	cluster_F	ESR2 21235772 ChIP-Seq MCF-7 Human	3/370	0.000927943	0.109772	20.05	139.998	MARCKS;LMCD1;IGSF9	top2	TRUE	ESR2	FAT:NA|ADR:12.957|LUN:NA|HTH:NA|SPL:NA|MUS:NA|LIV:NA|KID:NA|PIT:NA	FAT:7.823|ADR:7.618|LUN:NA|HTH:7.913|SPL:7.653|MUS:7.984|LIV:7.785|KID:7.921|PIT:7.682	FALSE	FALSE
EZH2	cluster_F	EZH2 27294783 Chip-Seq ESCs Mouse	5/1649	0.0011461	0.109772	9.299	62.967	MARCKS;STAC2;DDIT4L;LHFPL2;SSTR2	top3	FALSE	EZH2	FAT:NA|ADR:NA|LUN:10.854|HTH:NA|SPL:17.294|MUS:NA|LIV:NA|KID:NA|PIT:NA	FAT:8.677|ADR:8.665|LUN:NA|HTH:8.642|SPL:10.198|MUS:8.543|LIV:8.721|KID:8.742|PIT:8.232	FALSE	TRUE
RING1B	cluster_F	RING1B 27294783 Chip-Seq ESCs Mouse	5/1651	0.00115246	0.109772	9.287	62.832	MARCKS;STAC2;DDIT4L;SSTR2;IGSF9	top4	FALSE	RING1	FAT:43.579|ADR:45.316|LUN:48.936|HTH:41.288|SPL:50.382|MUS:21.29|LIV:30.618|KID:NA|PIT:108.14	FAT:9.837|ADR:11.22|LUN:NA|HTH:10.87|SPL:10.435|MUS:10.191|LIV:9.856|KID:10.3|PIT:10.647	TRUE	TRUE
WT1	cluster_F	WT1 19549856 ChIP-ChIP CCG9911 Human	2/173	0.00388694	0.267502	25.754	142.94	MARCKS;IGSF9	top5	FALSE	WT1	FAT:47.483|ADR:NA|LUN:NA|HTH:NA|SPL:36.952|MUS:NA|LIV:NA|KID:NA|PIT:NA	FAT:9.827|ADR:8.801|LUN:NA|HTH:7.941|SPL:10.319|MUS:7.771|LIV:8.389|KID:10.239|PIT:7.631	FALSE	TRUE
KAP1	cluster_F	KAP1 27257070 Chip-Seq ESCs Mouse	4/1461	0.00616898	0.267502	7.268	36.982	STAC2;DDIT4L;SSTR2;IGSF9	top6	FALSE	TRIM28	FAT:146.817|ADR:145.978|LUN:165.394|HTH:74.057|SPL:221.222|MUS:123.993|LIV:78.687|KID:NA|PIT:165.71	FAT:10.707|ADR:11.889|LUN:NA|HTH:11.855|SPL:12.317|MUS:11.002|LIV:11.144|KID:11.009|PIT:11.904	TRUE	TRUE
TCFCP2L1	cluster_F	TCFCP2L1 18555785 ChIP-Seq MESCs Mouse	4/1486	0.00655454	0.267502	7.136	35.877	TMIE;DDIT4L;SSTR2;IGSF9	top7	FALSE	LBP	FAT:23.429|ADR:NA|LUN:NA|HTH:NA|SPL:NA|MUS:14.288|LIV:878.684|KID:NA|PIT:NA	FAT:10.39|ADR:9.591|LUN:NA|HTH:8.357|SPL:8.187|MUS:9.945|LIV:11.662|KID:8.602|PIT:10.037	TRUE	TRUE
SUZ12	cluster_F	SUZ12 20075857 ChIP-Seq MESCs Mouse	6/3611	0.00693868	0.267502	5.454	27.109	MARCKS;STAC2;DDIT4L;LHFPL2;SSTR2;SEL1L3	top8	FALSE	SUZ12	FAT:26.121|ADR:25.605|LUN:30.633|HTH:15.493|SPL:35.385|MUS:12.387|LIV:15.423|KID:NA|PIT:23.595	FAT:11.658|ADR:11.925|LUN:NA|HTH:11.585|SPL:12.494|MUS:11.249|LIV:11.418|KID:11.83|PIT:11.709	FALSE	TRUE
MTF2	cluster_F	MTF2 20144788 ChIP-Seq MESCs Mouse	5/2488	0.00716272	0.267502	5.875	29.017	MARCKS;STAC2;DDIT4L;LHFPL2;SSTR2	top9	FALSE	MTF2	FAT:17.013|ADR:18.245|LUN:24.649|HTH:14.796|SPL:31.666|MUS:NA|LIV:NA|KID:NA|PIT:21.698	FAT:10.16|ADR:10.515|LUN:NA|HTH:11.086|SPL:11.677|MUS:10.578|LIV:10.223|KID:10.521|PIT:11.382	FALSE	TRUE
BRD4	cluster_F	BRD4 27068464 Chip-Seq AML-cells Mouse	4/1597	0.00846606	0.267502	6.599	31.488	TMIE;STAC2;LHFPL2;IGSF9	top10	FALSE	BRD4	FAT:98.721|ADR:90.342|LUN:121.249|HTH:47.05|SPL:129.54|MUS:109.833|LIV:66.166|KID:NA|PIT:100.541	FAT:11.671|ADR:12.102|LUN:NA|HTH:12.324|SPL:13.036|MUS:11.504|LIV:11.583|KID:11.637|PIT:12.177	TRUE	TRUE
TCF7L2	cluster_F	TCF7L2 21901280 ChIP-Seq H4IIE Rat	3/807	0.0084695	0.267502	8.948	42.695	LHFPL2;LMCD1;IGSF9	top11	FALSE	TCF7L2	FAT:47.666|ADR:20.987|LUN:36.508|HTH:26.198|SPL:43.451|MUS:NA|LIV:28.238|KID:NA|PIT:28.532	FAT:10.393|ADR:10.396|LUN:NA|HTH:11.438|SPL:10.658|MUS:9.679|LIV:10.456|KID:10.015|PIT:9.534	FALSE	TRUE
ZFP281	cluster_F	ZFP281 27345836 Chip-Seq ESCs Mouse	4/1646	0.00941844	0.267502	6.385	29.786	MARCKS;STAC2;SSTR2;IGSF9	top12	FALSE	ZFP281	FAT:NA|ADR:NA|LUN:NA|HTH:NA|SPL:NA|MUS:NA|LIV:NA|KID:NA|PIT:NA	FAT:9.486|ADR:10.094|LUN:NA|HTH:10.105|SPL:9.993|MUS:9.98|LIV:10.327|KID:9.647|PIT:10.318	FALSE	TRUE
NFE2L2	cluster_F	NFE2L2 20460467 ChIP-Seq MEFs Mouse	3/870	0.0104129	0.267502	8.271	37.754	MARCKS;LHFPL2;LMCD1	top13	FALSE	NFE2L2	FAT:137.34|ADR:87.683|LUN:118.604|HTH:50.194|SPL:80.759|MUS:54.788|LIV:49.833|KID:NA|PIT:104.104	FAT:9.686|ADR:9.896|LUN:NA|HTH:8.347|SPL:9.167|MUS:9.394|LIV:9.659|KID:9.252|PIT:9.119	TRUE	TRUE
NRF2	cluster_F	NRF2 20460467 ChIP-Seq MEFs Mouse	3/870	0.0104129	0.267502	8.271	37.754	MARCKS;LHFPL2;LMCD1	top14	FALSE	NFE2L2	FAT:137.34|ADR:87.683|LUN:118.604|HTH:50.194|SPL:80.759|MUS:54.788|LIV:49.833|KID:NA|PIT:104.104	FAT:9.686|ADR:9.896|LUN:NA|HTH:8.347|SPL:9.167|MUS:9.394|LIV:9.659|KID:9.252|PIT:9.119	TRUE	TRUE
RUNX2	cluster_F	RUNX2 22187159 ChIP-Seq PCA Human	5/2722	0.0105316	0.267502	5.298	24.122	MARCKS;TRIL;STAC2;SSTR2;SEL1L3	top15	FALSE	RUNX2	FAT:NA|ADR:NA|LUN:10.52|HTH:NA|SPL:11.345|MUS:NA|LIV:NA|KID:NA|PIT:NA	FAT:7.726|ADR:7.531|LUN:NA|HTH:7.676|SPL:7.522|MUS:7.608|LIV:7.615|KID:7.56|PIT:7.583	FALSE	FALSE
SMAD3	cluster_F	SMAD3 21741376 ChIP-Seq HESCs Human	3/984	0.0145565	0.32438	7.266	30.733	DDIT4L;LHFPL2;LMCD1	top16	FALSE	SMAD3	FAT:109.688|ADR:24.531|LUN:90.385|HTH:21.12|SPL:69.085|MUS:97.914|LIV:42.992|KID:NA|PIT:69.959	FAT:10.912|ADR:11.258|LUN:NA|HTH:10.262|SPL:11.127|MUS:12.152|LIV:10.247|KID:11.133|PIT:11.284	TRUE	TRUE
SALL4	cluster_F	SALL4 28974232 ChIP-Seq Mouse BoneMarrow Leukemia	2/352	0.0152955	0.32438	12.469	52.124	MARCKS;DDIT4L	top17	FALSE	SALL4	FAT:NA|ADR:NA|LUN:NA|HTH:NA|SPL:NA|MUS:NA|LIV:NA|KID:NA|PIT:NA	FAT:7.763|ADR:7.658|LUN:NA|HTH:7.717|SPL:7.779|MUS:8.493|LIV:7.63|KID:7.763|PIT:7.721	FALSE	TRUE
JARID2	cluster_F	JARID2 20075857 ChIP-Seq MESCs Mouse	3/1055	0.0175585	0.32438	6.75	27.286	LHFPL2;SSTR2;SEL1L3	top18	FALSE	JARID2	FAT:23.939|ADR:16.58|LUN:30.197|HTH:18.029|SPL:41.324|MUS:22.091|LIV:NA|KID:NA|PIT:19.715	FAT:7.759|ADR:7.657|LUN:NA|HTH:7.544|SPL:7.743|MUS:7.607|LIV:7.645|KID:7.693|PIT:7.596	FALSE	FALSE
STAT5A	cluster_F	STAT5A 24692510 ChIP-Seq Epithelium Mouse Mammary	4/1977	0.0177868	0.32438	5.218	21.024	MARCKS;STAC2;IGSF9;SEL1L3	top19	FALSE	STAT5A	FAT:118.824|ADR:98.509|LUN:66.159|HTH:16.288|SPL:83.851|MUS:34.006|LIV:11.643|KID:NA|PIT:33.373	FAT:10.391|ADR:9.222|LUN:NA|HTH:8.087|SPL:10.023|MUS:9.23|LIV:9.17|KID:9.132|PIT:9.046	TRUE	TRUE
NR3C1	cluster_F	NR3C1 27076634 ChIP-Seq BEAS2B Human Lung Inflammation	5/3084	0.0177887	0.32438	4.577	18.44	MARCKS;STAC2;DDIT4L;LHFPL2;SEL1L3	top20	TRUE	NR3C1	FAT:90.796|ADR:22.305|LUN:74.366|HTH:32.889|SPL:46.401|MUS:75.227|LIV:37.687|KID:NA|PIT:64.784	FAT:7.997|ADR:7.926|LUN:NA|HTH:7.918|SPL:7.842|MUS:7.992|LIV:8.027|KID:7.9|PIT:7.872	TRUE	TRUE
TCFAP2C	cluster_F	TCFAP2C 20176728 ChIP-ChIP TROPHOBLAST STEM CELLS Mouse	4/1980	0.0178792	0.32438	5.209	20.962	MARCKS;LHFPL2;LMCD1;IGSF9	top21	FALSE	TFAP2C	FAT:NA|ADR:NA|LUN:NA|HTH:NA|SPL:NA|MUS:NA|LIV:NA|KID:NA|PIT:NA	FAT:8.027|ADR:7.675|LUN:NA|HTH:7.614|SPL:7.766|MUS:7.751|LIV:7.96|KID:7.931|PIT:7.792	FALSE	TRUE
TEAD4	cluster_F	TEAD4 26923725 Chip-Seq HEMANGIOBLAST Mouse	2/406	0.0200291	0.328344	10.773	42.128	MARCKS;LHFPL2	top23	FALSE	TEAD4	FAT:15.884|ADR:NA|LUN:25.886|HTH:NA|SPL:NA|MUS:57.98|LIV:NA|KID:NA|PIT:NA	FAT:7.913|ADR:7.725|LUN:NA|HTH:7.723|SPL:7.718|MUS:8.092|LIV:7.737|KID:7.94|PIT:7.785	TRUE	TRUE
POU5F1	cluster_F	POU5F1 26923725 Chip-Seq MESODERM Mouse	2/406	0.0200291	0.328344	10.773	42.128	MARCKS;LHFPL2	top22	FALSE	POU5F1	FAT:NA|ADR:NA|LUN:NA|HTH:NA|SPL:NA|MUS:NA|LIV:NA|KID:NA|PIT:NA	FAT:8.022|ADR:7.925|LUN:NA|HTH:7.917|SPL:8.231|MUS:8.23|LIV:8.082|KID:7.875|PIT:8.217	FALSE	TRUE
CEBPD	cluster_F	CEBPD 23245923 ChIP-Seq MEFs Mouse	2/413	0.0206831	0.328344	10.586	41.055	MARCKS;LHFPL2	top24	FALSE	CEBPD	FAT:327.483|ADR:88.103|LUN:221.259|HTH:36.354|SPL:155.305|MUS:95.252|LIV:140.356|KID:NA|PIT:180.382	FAT:7.564|ADR:7.582|LUN:NA|HTH:7.464|SPL:7.631|MUS:7.724|LIV:7.564|KID:7.568|PIT:7.723	TRUE	FALSE
RNF2	cluster_F	RNF2 27304074 Chip-Seq ESCs Mouse	3/1205	0.0249968	0.380952	5.861	21.622	MARCKS;STAC2;SEL1L3	top25	FALSE	RNF2	FAT:13.207|ADR:NA|LUN:NA|HTH:NA|SPL:10.627|MUS:NA|LIV:NA|KID:NA|PIT:10.029	FAT:8.731|ADR:8.541|LUN:NA|HTH:8.114|SPL:8.265|MUS:8.239|LIV:8.294|KID:8.305|PIT:8.166	FALSE	TRUE
SOX17	cluster_F	SOX17 20123909 ChIP-Seq XEN Mouse	3/1363	0.0344714	0.384426	5.137	17.298	MARCKS;STAC2;LHFPL2	top26	FALSE	SOX17	FAT:68.198|ADR:NA|LUN:15.39|HTH:NA|SPL:20.541|MUS:NA|LIV:NA|KID:NA|PIT:NA	FAT:10.206|ADR:9.659|LUN:NA|HTH:8.586|SPL:8.656|MUS:9.589|LIV:8.55|KID:9.232|PIT:7.901	TRUE	TRUE
FOXO3	cluster_F	FOXO3 23340844 ChIP-Seq DLD1 Human	2/576	0.0383383	0.384426	7.516	24.513	LHFPL2;LMCD1	top27	FALSE	FOXO3	FAT:127.277|ADR:30.108|LUN:137.522|HTH:35.34|SPL:70.519|MUS:180.669|LIV:34.652|KID:NA|PIT:42.973	FAT:8.267|ADR:8.149|LUN:NA|HTH:8.21|SPL:9.297|MUS:7.997|LIV:8.691|KID:8.728|PIT:8.243	TRUE	TRUE
ESR1	cluster_F	ESR1 26153859 ChIP-Seq T47D Human Breast Carcinoma	3/1452	0.0405539	0.384426	4.798	15.379	TRIL;SSTR2;IGSF9	top28	TRUE	ESR1	FAT:NA|ADR:NA|LUN:NA|HTH:NA|SPL:NA|MUS:NA|LIV:22.157|KID:NA|PIT:30.934	FAT:10.582|ADR:9.21|LUN:NA|HTH:8.576|SPL:8.057|MUS:10.453|LIV:9.665|KID:9.386|PIT:11.323	FALSE	TRUE
ZFP281	cluster_F	ZFP281 18757296 ChIP-ChIP E14 Mouse	3/1466	0.0415595	0.384426	4.749	15.104	TMIE;STAC2;IGSF9	top29	FALSE	ZFP281	FAT:NA|ADR:NA|LUN:NA|HTH:NA|SPL:NA|MUS:NA|LIV:NA|KID:NA|PIT:NA	FAT:9.486|ADR:10.094|LUN:NA|HTH:10.105|SPL:9.993|MUS:9.98|LIV:10.327|KID:9.647|PIT:10.318	FALSE	TRUE
NFKB1	cluster_F	NFKB1 27076634 ChIP-Seq BEAS2B Human Lung Inflammation	5/3823	0.0422583	0.384426	3.53	11.167	MARCKS;LHFPL2;SSTR2;LMCD1;SEL1L3	top30	FALSE	NFKB1	FAT:67.417|ADR:39.367|LUN:67.748|HTH:11.635|SPL:63.929|MUS:27.051|LIV:23.261|KID:NA|PIT:24.31	FAT:10.58|ADR:10.972|LUN:NA|HTH:9.99|SPL:12.019|MUS:10.415|LIV:10.281|KID:9.983|PIT:10.296	TRUE	TRUE
LUZP1	cluster_F	LUZP1 20508642 ChIP-Seq ESCs Mouse	3/1480	0.0425784	0.384426	4.7	14.835	MARCKS;STAC2;SSTR2	top31	FALSE	LUZP1	FAT:43.955|ADR:48.972|LUN:57.77|HTH:22.976|SPL:38.646|MUS:NA|LIV:NA|KID:NA|PIT:24.039	FAT:10.618|ADR:10.572|LUN:NA|HTH:11.019|SPL:9.528|MUS:10.251|LIV:10.179|KID:10.39|PIT:9.855	TRUE	TRUE
SOX11	cluster_F	SOX11 22085726 ChIP-Seq ESNs Mouse	3/1484	0.0428719	0.384426	4.686	14.76	MARCKS;IGSF9;SEL1L3	top32	FALSE	SOX11	FAT:NA|ADR:NA|LUN:NA|HTH:NA|SPL:NA|MUS:NA|LIV:NA|KID:NA|PIT:NA	FAT:9.012|ADR:8.186|LUN:NA|HTH:10.855|SPL:8.344|MUS:8.194|LIV:7.922|KID:8.016|PIT:11.616	FALSE	TRUE
CRX	cluster_F	CRX 20693478 ChIP-Seq RETINA Mouse	3/1492	0.0434622	0.384426	4.659	14.611	MARCKS;LHFPL2;IGSF9	top33	FALSE	CRX	FAT:NA|ADR:NA|LUN:NA|HTH:NA|SPL:NA|MUS:NA|LIV:NA|KID:NA|PIT:NA	FAT:7.835|ADR:7.591|LUN:NA|HTH:7.759|SPL:7.64|MUS:8.107|LIV:7.684|KID:7.756|PIT:7.509	FALSE	TRUE
FLI1	cluster_F	FLI1 21867929 ChIP-Seq TH2 Mouse	3/1496	0.0437589	0.384426	4.646	14.537	MARCKS;STAC2;LHFPL2	top34	FALSE	FLI1	FAT:50.55|ADR:NA|LUN:69.071|HTH:10.259|SPL:154.592|MUS:NA|LIV:NA|KID:NA|PIT:NA	FAT:8.196|ADR:8.497|LUN:NA|HTH:7.802|SPL:9.203|MUS:8.126|LIV:8.048|KID:7.835|PIT:7.668	TRUE	TRUE
NR1I2	cluster_F	NR1I2 20693526 ChIP-Seq LIVER Mouse	2/631	0.0452641	0.384426	6.84	21.171	TMIE;LMCD1	top35	TRUE	NR1I2	FAT:NA|ADR:NA|LUN:NA|HTH:NA|SPL:NA|MUS:NA|LIV:98.869|KID:NA|PIT:NA	FAT:7.541|ADR:7.633|LUN:NA|HTH:7.561|SPL:7.532|MUS:8.028|LIV:11.198|KID:8.497|PIT:7.618	TRUE	TRUE
OCT4	cluster_F	OCT4 21477851 ChIP-Seq ESCs Mouse	3/1517	0.0453345	0.384426	4.576	14.157	MARCKS;STAC2;IGSF9	top36	FALSE	POU5F1	FAT:NA|ADR:NA|LUN:NA|HTH:NA|SPL:NA|MUS:NA|LIV:NA|KID:NA|PIT:NA	FAT:8.022|ADR:7.925|LUN:NA|HTH:7.917|SPL:8.231|MUS:8.23|LIV:8.082|KID:7.875|PIT:8.217	FALSE	TRUE
SUZ12	cluster_F	SUZ12 18692474 ChIP-Seq MESCs Mouse	3/1531	0.0464014	0.384426	4.531	13.911	STAC2;LHFPL2;SSTR2	top37	FALSE	SUZ12	FAT:26.121|ADR:25.605|LUN:30.633|HTH:15.493|SPL:35.385|MUS:12.387|LIV:15.423|KID:NA|PIT:23.595	FAT:11.658|ADR:11.925|LUN:NA|HTH:11.585|SPL:12.494|MUS:11.249|LIV:11.418|KID:11.83|PIT:11.709	FALSE	TRUE
DMRT1	cluster_F	DMRT1 21621532 ChIP-ChIP FETAL Ovary	1/88	0.0473605	0.384426	22.876	69.771	MARCKS	top38	FALSE	DMRT1	FAT:NA|ADR:NA|LUN:NA|HTH:NA|SPL:NA|MUS:NA|LIV:NA|KID:NA|PIT:NA	FAT:7.747|ADR:7.676|LUN:NA|HTH:7.588|SPL:7.617|MUS:7.66|LIV:7.629|KID:7.737|PIT:7.851	FALSE	FALSE
MYC	cluster_F	MYC 27129775 Chip-Seq CORNEA Mouse	3/1547	0.0476368	0.384426	4.48	13.637	MARCKS;STAC2;DDIT4L	top39	FALSE	MYC	FAT:326.368|ADR:58.718|LUN:65.632|HTH:NA|SPL:92.701|MUS:36.232|LIV:27.153|KID:NA|PIT:18.176	FAT:8.081|ADR:8.39|LUN:NA|HTH:7.986|SPL:8.469|MUS:7.831|LIV:8.247|KID:8.038|PIT:7.869	TRUE	TRUE
NRF2	cluster_F	NRF2 31884422 ChIP-Seq A549 Human Lung Carcinoma	3/1563	0.0488892	0.384426	4.43	13.371	MARCKS;TRIL;SEL1L3	top40	FALSE	NFE2L2	FAT:137.34|ADR:87.683|LUN:118.604|HTH:50.194|SPL:80.759|MUS:54.788|LIV:49.833|KID:NA|PIT:104.104	FAT:9.686|ADR:9.896|LUN:NA|HTH:8.347|SPL:9.167|MUS:9.394|LIV:9.659|KID:9.252|PIT:9.119	TRUE	TRUE
SUZ12	cluster_F	SUZ12 18974828 ChIP-Seq MESCs Mouse	3/1564	0.0489681	0.384426	4.427	13.354	STAC2;DDIT4L;LHFPL2	top41	FALSE	SUZ12	FAT:26.121|ADR:25.605|LUN:30.633|HTH:15.493|SPL:35.385|MUS:12.387|LIV:15.423|KID:NA|PIT:23.595	FAT:11.658|ADR:11.925|LUN:NA|HTH:11.585|SPL:12.494|MUS:11.249|LIV:11.418|KID:11.83|PIT:11.709	FALSE	TRUE
SMAD2/3	cluster_F	SMAD2/3 21741376 ChIP-Seq EPCs Human	3/1567	0.049205	0.384426	4.418	13.305	MARCKS;DDIT4L;LHFPL2	top42	FALSE	SMAD3	FAT:109.688|ADR:24.531|LUN:90.385|HTH:21.12|SPL:69.085|MUS:97.914|LIV:42.992|KID:NA|PIT:69.959	FAT:10.912|ADR:11.258|LUN:NA|HTH:10.262|SPL:11.127|MUS:12.152|LIV:10.247|KID:11.133|PIT:11.284	TRUE	TRUE
VDR	cluster_F	VDR 24787735 ChIP-Seq THP-1 Human	2/663	0.0494983	0.384426	6.498	19.531	MARCKS;SEL1L3	top43	TRUE	VDR	FAT:NA|ADR:36.074|LUN:22.797|HTH:NA|SPL:NA|MUS:NA|LIV:NA|KID:NA|PIT:38.636	FAT:8.065|ADR:9.311|LUN:NA|HTH:7.969|SPL:8.289|MUS:8.253|LIV:8.305|KID:12.613|PIT:9.605	FALSE	TRUE
SOX2	cluster_F	SOX2 27498859 Chip-Seq STOMACH Mouse	3/1573	0.0496807	0.384426	4.399	13.208	MARCKS;SSTR2;SEL1L3	top44	FALSE	SOX2	FAT:NA|ADR:NA|LUN:NA|HTH:64.448|SPL:NA|MUS:NA|LIV:NA|KID:NA|PIT:25.59	FAT:8.007|ADR:7.668|LUN:NA|HTH:9.112|SPL:7.868|MUS:7.815|LIV:8.148|KID:7.91|PIT:8.309	TRUE	TRUE
FOXM1	cluster_F	FOXM1 26100407 CHIP-SEQ Hek293 Flp-In Human	3/1577	0.0499991	0.384426	4.387	13.143	MARCKS;TRIL;LHFPL2	top45	FALSE	FOXM1	FAT:NA|ADR:NA|LUN:NA|HTH:NA|SPL:20.9|MUS:NA|LIV:NA|KID:NA|PIT:NA	FAT:8.159|ADR:8.357|LUN:NA|HTH:8.19|SPL:9.708|MUS:8.138|LIV:8.14|KID:8.252|PIT:8.342	FALSE	TRUE

## Sheet: G
Gene expression changes in cluster G occur in the following tissues: SPL.
TF	cluster	Term	Overlap	P.value	Adjusted.P.value	Odds.Ratio	Combined.Score	Genes	TF_rank	nuclear_receptors	mapped_name	tissue_cpm_gtex	tissue_log2_microarray	pattern_tissue_colocalization_gtex	pattern_tissue_colocalization_microarray
NR3C1	cluster_G	NR3C1 23031785 ChIP-Seq PC12 Mouse	4/730	0.00131479	0.313478	10.612	70.398	PIK3IP1;RASGRF1;CPE;THRSP	top1	TRUE	NR3C1	FAT:90.796|ADR:22.305|LUN:74.366|HTH:32.889|SPL:46.401|MUS:75.227|LIV:37.687|KID:NA|PIT:64.784	FAT:7.997|ADR:7.926|LUN:NA|HTH:7.918|SPL:7.842|MUS:7.992|LIV:8.027|KID:7.9|PIT:7.872	TRUE	TRUE
RUNX2	cluster_G	RUNX2 22187159 ChIP-Seq C42B Human ProstateCancer	2/119	0.00304866	0.313478	28.303	163.963	RASGRF1;THRSP	top2	FALSE	RUNX2	FAT:NA|ADR:NA|LUN:10.52|HTH:NA|SPL:11.345|MUS:NA|LIV:NA|KID:NA|PIT:NA	FAT:7.726|ADR:7.531|LUN:NA|HTH:7.676|SPL:7.522|MUS:7.608|LIV:7.615|KID:7.56|PIT:7.583	FALSE	FALSE
ARID1A	cluster_G	ARID1A 32646524 ChIP-Seq H9 Human BoneMarrow Lymphoma	2/119	0.00304866	0.313478	28.303	163.963	RASGRF1;THRSP	top3	FALSE	ARID1A	FAT:82.307|ADR:84.172|LUN:102.667|HTH:46.495|SPL:147.54|MUS:57.952|LIV:48.585|KID:NA|PIT:90.269	FAT:11.66|ADR:12.311|LUN:NA|HTH:12.391|SPL:13.506|MUS:11.185|LIV:11.199|KID:11.708|PIT:12.157	TRUE	TRUE
CREB1	cluster_G	CREB1 26743006 Chip-Seq LNCaP-abl Human	5/1626	0.00378812	0.313478	6.294	35.095	PIK3IP1;RASGRF1;TRNP1;PDCD4;NETO2	top4	FALSE	CREB1	FAT:37.273|ADR:20.423|LUN:38.816|HTH:19.525|SPL:42.107|MUS:11.625|LIV:11.903|KID:NA|PIT:27.008	FAT:7.94|ADR:8.493|LUN:NA|HTH:9.068|SPL:8.526|MUS:8.394|LIV:8.052|KID:8.178|PIT:8.375	FALSE	TRUE
SETDB1	cluster_G	SETDB1 19884257 ChIP-Seq MESCs Mouse	5/1634	0.0038701	0.313478	6.26	34.774	MRAS;RASGRF1;CPE;NETO2;SYTL3	top5	FALSE	SETDB1	ADR:35.972|FAT:35.106|HTH:17.05|KID:NA|LIV:22.341|MUS:24.181|SPL:70.616|LUN:44.642	ADR:9.377|FAT:9.271|HTH:9.553|KID:9.133|LIV:9.432|MUS:8.97|SPL:9.865|LUN:NA	TRUE	TRUE
SRY	cluster_G	SRY 25088423 ChIP-ChIP EMBRYONIC GONADS Mouse	6/2614	0.00582417	0.376215	4.998	25.716	ITIH3;MRAS;PDCD4;GPR83;ENO2;SYTL3	top6	FALSE	SRY	FAT:NA|ADR:NA|LUN:NA|HTH:NA|SPL:NA|MUS:NA|LIV:NA|KID:NA|PIT:NA	FAT:7.64|ADR:7.554|LUN:NA|HTH:7.477|SPL:7.497|MUS:7.559|LIV:7.579|KID:7.542|PIT:7.596	FALSE	FALSE
SUZ12	cluster_G	SUZ12 20075857 ChIP-Seq MESCs Mouse	7/3611	0.00650248	0.376215	4.546	22.889	MRAS;PEX11A;RASGRF1;TRNP1;CPE;GPR83;ENO2	top7	FALSE	SUZ12	FAT:26.121|ADR:25.605|LUN:30.633|HTH:15.493|SPL:35.385|MUS:12.387|LIV:15.423|KID:NA|PIT:23.595	FAT:11.658|ADR:11.925|LUN:NA|HTH:11.585|SPL:12.494|MUS:11.249|LIV:11.418|KID:11.83|PIT:11.709	FALSE	TRUE
PPARG	cluster_G	PPARG 19300518 ChIP-PET 3T3-L1 Mouse	2/191	0.00765566	0.387568	17.458	85.059	THRSP;ENO2	top8	TRUE	PPARG	FAT:126.709|ADR:NA|LUN:22.652|HTH:NA|SPL:13.807|MUS:NA|LIV:NA|KID:NA|PIT:NA	FAT:13.372|ADR:11.26|LUN:NA|HTH:7.99|SPL:9.888|MUS:9.47|LIV:9.801|KID:8.222|PIT:7.832	TRUE	TRUE
STAT1	cluster_G	STAT1 17558387 ChIP-Seq HELA Human	4/1349	0.0119401	0.424157	5.544	24.547	MRAS;PEX11A;PDCD4;CPE	top9	FALSE	STAT1	FAT:84.043|ADR:95.991|LUN:125.711|HTH:76.771|SPL:149.642|MUS:41.223|LIV:53.084|KID:NA|PIT:79.141	FAT:11.866|ADR:11.862|LUN:NA|HTH:9.516|SPL:11.9|MUS:9.67|LIV:10.439|KID:9.961|PIT:9.913	TRUE	TRUE
GATA3	cluster_G	GATA3 21867929 ChIP-Seq TH1 Mouse	4/1372	0.0126556	0.424157	5.444	23.788	PIK3IP1;CPE;ZCCHC18;NETO2	top10	FALSE	GATA3	FAT:NA|ADR:NA|LUN:NA|HTH:NA|SPL:12.747|MUS:NA|LIV:NA|KID:NA|PIT:11.306	FAT:8.584|ADR:9.672|LUN:NA|HTH:7.831|SPL:8.586|MUS:7.963|LIV:7.818|KID:9.487|PIT:7.671	FALSE	TRUE
GATA4	cluster_G	GATA4 21415370 ChIP-Seq HL-1 Mouse	4/1374	0.0127191	0.424157	5.435	23.723	MRAS;PIK3IP1;RASGRF1;CPE	top11	FALSE	GATA4	FAT:NA|ADR:NA|LUN:NA|HTH:NA|SPL:NA|MUS:NA|LIV:31.882|KID:NA|PIT:NA	FAT:8.044|ADR:7.798|LUN:NA|HTH:7.719|SPL:7.616|MUS:8.099|LIV:7.885|KID:7.889|PIT:7.629	FALSE	TRUE
RNF2	cluster_G	RNF2 27304074 Chip-Seq NSC Mouse	3/782	0.0156968	0.424157	6.724	27.935	PIK3IP1;RASGRF1;NETO2	top12	FALSE	RNF2	FAT:13.207|ADR:NA|LUN:NA|HTH:NA|SPL:10.627|MUS:NA|LIV:NA|KID:NA|PIT:10.029	FAT:8.731|ADR:8.541|LUN:NA|HTH:8.114|SPL:8.265|MUS:8.239|LIV:8.294|KID:8.305|PIT:8.166	FALSE	TRUE
PRDM14	cluster_G	PRDM14 21183938 ChIP-Seq MESCs Mouse	4/1520	0.0179403	0.424157	4.873	19.594	PIK3IP1;CPE;NETO2;ENO2	top13	FALSE	PRDM14	FAT:NA|ADR:NA|LUN:NA|HTH:NA|SPL:NA|MUS:NA|LIV:NA|KID:NA|PIT:NA	FAT:7.686|ADR:7.631|LUN:NA|HTH:7.615|SPL:7.551|MUS:7.622|LIV:7.672|KID:7.533|PIT:7.575	FALSE	FALSE
SMC3	cluster_G	SMC3 22415368 ChIP-Seq MEFs Mouse	4/1546	0.0189951	0.424157	4.784	18.963	PIK3IP1;TRNP1;PDCD4;CPE	top14	FALSE	SMC3	FAT:39.404|ADR:30.955|LUN:36.623|HTH:22.5|SPL:44.858|MUS:26.496|LIV:14.383|KID:NA|PIT:39.443	FAT:10.113|ADR:9.841|LUN:NA|HTH:9.385|SPL:9.564|MUS:9.215|LIV:9.016|KID:9.47|PIT:9.967	FALSE	TRUE
MYC	cluster_G	MYC 27129775 Chip-Seq CORNEA Mouse	4/1547	0.0190365	0.424157	4.781	18.94	ITIH3;PIK3IP1;ZCCHC18;ENO2	top15	FALSE	MYC	FAT:326.368|ADR:58.718|LUN:65.632|HTH:NA|SPL:92.701|MUS:36.232|LIV:27.153|KID:NA|PIT:18.176	FAT:8.081|ADR:8.39|LUN:NA|HTH:7.986|SPL:8.469|MUS:7.831|LIV:8.247|KID:8.038|PIT:7.869	TRUE	TRUE
RUNX1	cluster_G	RUNX1 22412390 ChIP-Seq EML Mouse	4/1561	0.0196214	0.424157	4.734	18.612	PIK3IP1;TRNP1;PDCD4;THRSP	top16	FALSE	RUNX1	FAT:59.245|ADR:14.442|LUN:91.415|HTH:NA|SPL:44.823|MUS:39.807|LIV:13.6|KID:NA|PIT:25.275	FAT:7.769|ADR:7.977|LUN:NA|HTH:7.835|SPL:8.629|MUS:7.763|LIV:7.794|KID:7.745|PIT:7.75	TRUE	TRUE
MYB	cluster_G	MYB 26560356 Chip-Seq TH1 Human	4/1610	0.0217591	0.424157	4.578	17.523	PIK3IP1;TRNP1;PDCD4;SYTL3	top17	FALSE	MYB	FAT:NA|ADR:NA|LUN:NA|HTH:NA|SPL:NA|MUS:NA|LIV:NA|KID:NA|PIT:NA	FAT:7.858|ADR:7.78|LUN:NA|HTH:7.942|SPL:8.427|MUS:7.986|LIV:7.893|KID:7.846|PIT:8.005	FALSE	TRUE
MTF2	cluster_G	MTF2 20144788 ChIP-Seq MESCs Mouse	5/2488	0.0225551	0.424157	3.916	14.849	MRAS;RASGRF1;CPE;GPR83;NETO2	top18	FALSE	MTF2	FAT:17.013|ADR:18.245|LUN:24.649|HTH:14.796|SPL:31.666|MUS:NA|LIV:NA|KID:NA|PIT:21.698	FAT:10.16|ADR:10.515|LUN:NA|HTH:11.086|SPL:11.677|MUS:10.578|LIV:10.223|KID:10.521|PIT:11.382	FALSE	TRUE
CTCF	cluster_G	CTCF 27219007 Chip-Seq Bcells Human	4/1633	0.0228117	0.424157	4.508	17.041	MRAS;TRNP1;PDCD4;GPR83	top19	FALSE	CTCF	FAT:38.255|ADR:31.72|LUN:38.483|HTH:25.258|SPL:52.024|MUS:34.038|LIV:19.431|KID:NA|PIT:33.605	FAT:10.174|ADR:10.54|LUN:NA|HTH:10.095|SPL:11.249|MUS:10.172|LIV:10.004|KID:10.241|PIT:10.401	TRUE	TRUE
TCF7	cluster_G	TCF7 22412390 ChIP-Seq EML Mouse	4/1635	0.0229047	0.424157	4.502	17	PIK3IP1;TRNP1;PDCD4;NETO2	top20	FALSE	TCF7	FAT:NA|ADR:NA|LUN:12.05|HTH:NA|SPL:44.904|MUS:NA|LIV:NA|KID:NA|PIT:17.488	FAT:8.267|ADR:9.166|LUN:NA|HTH:7.944|SPL:9.583|MUS:7.82|LIV:8.183|KID:8.174|PIT:7.609	FALSE	TRUE
CREB1	cluster_G	CREB1 26743006 Chip-Seq LNCaP Human	4/1645	0.0233735	0.424157	4.472	16.796	PIK3IP1;PDCD4;THRSP;NETO2	top21	FALSE	CREB1	FAT:37.273|ADR:20.423|LUN:38.816|HTH:19.525|SPL:42.107|MUS:11.625|LIV:11.903|KID:NA|PIT:27.008	FAT:7.94|ADR:8.493|LUN:NA|HTH:9.068|SPL:8.526|MUS:8.394|LIV:8.052|KID:8.178|PIT:8.375	FALSE	TRUE
SA1	cluster_G	SA1 27219007 Chip-Seq ERYTHROID Human	4/1646	0.0234207	0.424157	4.469	16.776	RASGRF1;TRNP1;NETO2;ENO2	top22	FALSE	STAG1	FAT:47.711|ADR:30.672|LUN:40.663|HTH:20.124|SPL:34.931|MUS:33.721|LIV:16.155|KID:NA|PIT:28.303	FAT:10.516|ADR:10.148|LUN:NA|HTH:9.63|SPL:9.751|MUS:9.815|LIV:9.527|KID:9.862|PIT:9.823	FALSE	TRUE
KDM2B	cluster_G	KDM2B 26808549 Chip-Seq JURKAT Human	4/1660	0.0240879	0.424157	4.428	16.497	PIK3IP1;TRNP1;PDCD4;NETO2	top23	FALSE	KDM2B	FAT:24.795|ADR:18.857|LUN:36.24|HTH:19.149|SPL:54.757|MUS:12.678|LIV:18.981|KID:NA|PIT:27.482	FAT:9.521|ADR:9.548|LUN:NA|HTH:9.883|SPL:10.717|MUS:9.461|LIV:9.297|KID:9.557|PIT:9.449	TRUE	TRUE
SUZ12	cluster_G	SUZ12 16625203 ChIP-ChIP MESCs Mouse	3/944	0.0258289	0.435863	5.52	20.182	RASGRF1;GPR83;ENO2	top24	FALSE	SUZ12	FAT:26.121|ADR:25.605|LUN:30.633|HTH:15.493|SPL:35.385|MUS:12.387|LIV:15.423|KID:NA|PIT:23.595	FAT:11.658|ADR:11.925|LUN:NA|HTH:11.585|SPL:12.494|MUS:11.249|LIV:11.418|KID:11.83|PIT:11.709	FALSE	TRUE
KAP1	cluster_G	KAP1 22055183 ChIP-Seq ESCs Mouse	3/1009	0.0307038	0.490598	5.145	17.924	PDCD4;NETO2;SYTL3	top25	FALSE	TRIM28	FAT:146.817|ADR:145.978|LUN:165.394|HTH:74.057|SPL:221.222|MUS:123.993|LIV:78.687|KID:NA|PIT:165.71	FAT:10.707|ADR:11.889|LUN:NA|HTH:11.855|SPL:12.317|MUS:11.002|LIV:11.144|KID:11.009|PIT:11.904	TRUE	TRUE
SUZ12	cluster_G	SUZ12 18692474 ChIP-Seq MEFs Mouse	3/1019	0.0314951	0.490598	5.092	17.608	MRAS;RASGRF1;GPR83	top26	FALSE	SUZ12	FAT:26.121|ADR:25.605|LUN:30.633|HTH:15.493|SPL:35.385|MUS:12.387|LIV:15.423|KID:NA|PIT:23.595	FAT:11.658|ADR:11.925|LUN:NA|HTH:11.585|SPL:12.494|MUS:11.249|LIV:11.418|KID:11.83|PIT:11.709	FALSE	TRUE

## Sheet: H
Gene expression changes in cluster H occur in the following tissues: LIV.
TF	cluster	Term	Overlap	P.value	Adjusted.P.value	Odds.Ratio	Combined.Score	Genes	TF_rank	nuclear_receptors	mapped_name	tissue_cpm_gtex	tissue_log2_microarray	pattern_tissue_colocalization_gtex	pattern_tissue_colocalization_microarray
RXR	cluster_H	RXR 22158963 ChIP-Seq LIVER Mouse	9/1546	3.14136e-07	0.000149215	18.004	269.58	IGFBP1;SLC25A15;GDF15;INSIG2;FAM89A;LRTM1;ATP1B1;SERPINA5;DUSP14	top1	TRUE	RXRA	FAT:132.69|ADR:129.546|LUN:90.793|HTH:59.489|SPL:141.53|MUS:235.963|LIV:227.376|KID:NA|PIT:128.713	FAT:9.134|ADR:8.297|LUN:NA|HTH:8.121|SPL:8.228|MUS:8.958|LIV:10.024|KID:9.071|PIT:7.911	TRUE	TRUE
LXR	cluster_H	LXR 22158963 ChIP-Seq LIVER Mouse	7/1578	6.8594e-05	0.0162911	10.256	98.328	IGFBP1;SLC25A15;GDF15;INSIG2;RARRES1;ATP1B1;SERPINA5	top2	TRUE	NR1H3	FAT:85.357|ADR:27.267|LUN:41.438|HTH:NA|SPL:91.42|MUS:NA|LIV:61.118|KID:NA|PIT:13.787	FAT:12.356|ADR:10.386|LUN:NA|HTH:8.746|SPL:12.001|MUS:10.815|LIV:12.363|KID:11.505|PIT:9.269	TRUE	TRUE
ESR1	cluster_H	ESR1 17901129 ChIP-ChIP LIVER Mouse	4/354	0.000112869	0.0178709	20.4	185.421	IGFBP1;SLC25A15;GDF15;INSIG2	top3	TRUE	ESR1	FAT:NA|ADR:NA|LUN:NA|HTH:NA|SPL:NA|MUS:NA|LIV:22.157|KID:NA|PIT:30.934	FAT:10.582|ADR:9.21|LUN:NA|HTH:8.576|SPL:8.057|MUS:10.453|LIV:9.665|KID:9.386|PIT:11.323	FALSE	TRUE
CEBPB	cluster_H	CEBPB 21427703 ChIP-Seq 3T3-L1 Mouse	6/1531	0.00054507	0.0414824	8.07	60.642	WFDC12;SERPINE2;GDF15;ATP1B1;PKIG;DUSP14	top4	FALSE	CEBPB	FAT:176.779|ADR:130.429|LUN:169.177|HTH:17.272|SPL:114.108|MUS:120.021|LIV:132.369|KID:NA|PIT:38.078	FAT:12.864|ADR:13.63|LUN:NA|HTH:10.088|SPL:11.814|MUS:13.486|LIV:13.772|KID:11.979|PIT:12.37	TRUE	TRUE
NR1H3	cluster_H	NR1H3 23393188 ChIP-Seq ATHEROSCLEROTIC-FOAM Human	4/537	0.000554178	0.0414824	13.271	99.506	SERPINE2;GDF15;FAM89A;DUSP14	top5	TRUE	NR1H3	FAT:85.357|ADR:27.267|LUN:41.438|HTH:NA|SPL:91.42|MUS:NA|LIV:61.118|KID:NA|PIT:13.787	FAT:12.356|ADR:10.386|LUN:NA|HTH:8.746|SPL:12.001|MUS:10.815|LIV:12.363|KID:11.505|PIT:9.269	TRUE	TRUE
PPARA	cluster_H	PPARA 22158963 ChIP-Seq LIVER Mouse	6/1552	0.000586532	0.0414824	7.951	59.168	IGFBP1;SLC25A15;INSIG2;FAM89A;LRTM1;SERPINA5	top6	TRUE	PPARA	FAT:30.052|ADR:36.633|LUN:20.511|HTH:18.688|SPL:20.631|MUS:57.029|LIV:110.083|KID:NA|PIT:19.972	FAT:7.933|ADR:8.027|LUN:NA|HTH:7.578|SPL:7.47|MUS:8.145|LIV:9.407|KID:8.48|PIT:7.538	TRUE	TRUE
CJUN	cluster_H	CJUN 26792858 Chip-Seq BT549 Human	6/1564	0.000611319	0.0414824	7.885	58.347	SERPINE2;FAM89A;LRTM1;RARRES1;ATP1B1;PKIG	top7	FALSE	JUN	FAT:741.753|ADR:134.486|LUN:475.269|HTH:104.639|SPL:93.818|MUS:132.973|LIV:235.473|KID:NA|PIT:193.036	FAT:9.691|ADR:11.441|LUN:NA|HTH:9.247|SPL:8.84|MUS:10.016|LIV:8.916|KID:9.349|PIT:8.521	TRUE	TRUE
FOXO1	cluster_H	FOXO1 23066095 ChIP-Seq LIVER Mouse	3/276	0.00104599	0.0621055	18.051	123.882	IGFBP1;SERPINA5;DUSP14	top8	FALSE	FOXO1	FAT:104.15|ADR:28.44|LUN:68.138|HTH:13.875|SPL:40.232|MUS:178.519|LIV:28.209|KID:NA|PIT:32.602	FAT:10.462|ADR:9.696|LUN:NA|HTH:9.256|SPL:10.657|MUS:10.051|LIV:10.275|KID:10.062|PIT:10.193	TRUE	TRUE
ESR2	cluster_H	ESR2 21235772 ChIP-Seq MCF-7 Human	3/370	0.00242204	0.124259	13.364	80.492	GDF15;INSIG2;ATP1B1	top9	TRUE	ESR2	FAT:NA|ADR:12.957|LUN:NA|HTH:NA|SPL:NA|MUS:NA|LIV:NA|KID:NA|PIT:NA	FAT:7.823|ADR:7.618|LUN:NA|HTH:7.913|SPL:7.653|MUS:7.984|LIV:7.785|KID:7.921|PIT:7.682	FALSE	FALSE
ARNT	cluster_H	ARNT 22903824 ChIP-Seq MCF-7 Human	4/846	0.0029856	0.124259	8.267	48.066	GDF15;RARRES1;ATP1B1;SERPINA5	top10	TRUE	ARNT	FAT:71.461|ADR:60.887|LUN:79.153|HTH:21.063|SPL:54.789|MUS:44.728|LIV:40.774|KID:NA|PIT:46.924	FAT:11.109|ADR:11.008|LUN:NA|HTH:10.221|SPL:10.629|MUS:10.852|LIV:10.442|KID:10.098|PIT:10.63	TRUE	TRUE
GATA1	cluster_H	GATA1 21571218 ChIP-Seq MEGAKARYOCYTES Human	6/2132	0.00311188	0.124259	5.6	32.327	GDF15;FAM89A;LRTM1;RARRES1;ATP1B1;PKIG	top11	FALSE	GATA1	FAT:NA|ADR:NA|LUN:NA|HTH:NA|SPL:NA|MUS:NA|LIV:NA|KID:NA|PIT:NA	FAT:8.188|ADR:8.019|LUN:NA|HTH:7.797|SPL:9.354|MUS:7.96|LIV:7.701|KID:7.752|PIT:7.831	FALSE	TRUE
NFKB1	cluster_H	NFKB1 27076634 ChIP-Seq BEAS2B Human Lung Inflammation	8/3823	0.00313917	0.124259	4.844	27.92	IGFBP1;RSPH4A;SERPINE2;INSIG2;RARRES1;ATP1B1;SERPINA5;DUSP14	top12	FALSE	NFKB1	FAT:67.417|ADR:39.367|LUN:67.748|HTH:11.635|SPL:63.929|MUS:27.051|LIV:23.261|KID:NA|PIT:24.31	FAT:10.58|ADR:10.972|LUN:NA|HTH:9.99|SPL:12.019|MUS:10.415|LIV:10.281|KID:9.983|PIT:10.296	TRUE	TRUE
CRX	cluster_H	CRX 20693478 ChIP-Seq RETINA Mouse	5/1492	0.00365733	0.125931	6.22	34.9	IGFBP1;RSPH4A;SERPINE2;INSIG2;ATP1B1	top13	FALSE	CRX	FAT:NA|ADR:NA|LUN:NA|HTH:NA|SPL:NA|MUS:NA|LIV:NA|KID:NA|PIT:NA	FAT:7.835|ADR:7.591|LUN:NA|HTH:7.759|SPL:7.64|MUS:8.107|LIV:7.684|KID:7.756|PIT:7.509	FALSE	TRUE
OCT4	cluster_H	OCT4 21477851 ChIP-Seq ESCs Mouse	5/1517	0.00393153	0.125931	6.109	33.835	IGFBP1;RSPH4A;SERPINE2;INSIG2;ATP1B1	top14	FALSE	POU5F1	FAT:NA|ADR:NA|LUN:NA|HTH:NA|SPL:NA|MUS:NA|LIV:NA|KID:NA|PIT:NA	FAT:8.022|ADR:7.925|LUN:NA|HTH:7.917|SPL:8.231|MUS:8.23|LIV:8.082|KID:7.875|PIT:8.217	FALSE	TRUE
CTCF	cluster_H	CTCF 26484167 Chip-Seq Bcells Mouse	5/1521	0.00397676	0.125931	6.091	33.669	IGFBP1;GDF15;RARRES1;ATP1B1;DUSP14	top15	FALSE	CTCF	FAT:38.255|ADR:31.72|LUN:38.483|HTH:25.258|SPL:52.024|MUS:34.038|LIV:19.431|KID:NA|PIT:33.605	FAT:10.174|ADR:10.54|LUN:NA|HTH:10.095|SPL:11.249|MUS:10.172|LIV:10.004|KID:10.241|PIT:10.401	TRUE	TRUE
PCGF4	cluster_H	PCGF4 22325352 ChIP-Seq 293T-Rex Human	5/1594	0.0048709	0.13134	5.789	30.821	SERPINE2;INSIG2;FAM89A;LRTM1;ATP1B1	top16	FALSE	BMI1	FAT:43.42|ADR:44.138|LUN:39.674|HTH:43.813|SPL:50.8|MUS:34.319|LIV:23.98|KID:NA|PIT:67.407	FAT:8.172|ADR:8.951|LUN:NA|HTH:8.756|SPL:8.334|MUS:8.618|LIV:8.061|KID:8.347|PIT:8.217	TRUE	TRUE
CSB	cluster_H	CSB 26484114 Chip-Seq FIBROBLAST Human	5/1594	0.0048709	0.13134	5.789	30.821	IGFBP1;INSIG2;RARRES1;ATP1B1;PKIG	top17	FALSE	ERCC6	FAT:15.062|ADR:11.099|LUN:13.014|HTH:NA|SPL:16.676|MUS:NA|LIV:NA|KID:NA|PIT:26.318	FAT:7.752|ADR:7.98|LUN:NA|HTH:7.82|SPL:7.793|MUS:7.884|LIV:7.747|KID:7.74|PIT:7.742	FALSE	FALSE
GATA4	cluster_H	GATA4 25053715 ChIP-Seq YYC3 Human	5/1602	0.00497708	0.13134	5.757	30.529	GDF15;INSIG2;FAM89A;RARRES1;ATP1B1	top18	FALSE	GATA4	FAT:NA|ADR:NA|LUN:NA|HTH:NA|SPL:NA|MUS:NA|LIV:31.882|KID:NA|PIT:NA	FAT:8.044|ADR:7.798|LUN:NA|HTH:7.719|SPL:7.616|MUS:8.099|LIV:7.885|KID:7.889|PIT:7.629	FALSE	TRUE
TP53	cluster_H	TP53 22573176 ChIP-Seq HFKS Human	4/1039	0.00623627	0.155907	6.658	33.805	SLC25A15;SERPINE2;RARRES1;PKIG	top19	FALSE	TRP53	FAT:NA|ADR:NA|LUN:NA|HTH:NA|SPL:NA|MUS:NA|LIV:NA|KID:NA|PIT:NA	FAT:9.395|ADR:10.582|LUN:NA|HTH:9.668|SPL:11.31|MUS:9.539|LIV:9.822|KID:9.745|PIT:10.217	FALSE	TRUE
AHR	cluster_H	AHR 22903824 ChIP-Seq MCF-7 Human	3/577	0.00838962	0.199253	8.454	40.418	GDF15;RARRES1;ATP1B1	top20	TRUE	AHR	FAT:96.549|ADR:47.308|LUN:105.145|HTH:NA|SPL:38.363|MUS:NA|LIV:36.267|KID:NA|PIT:16.404	FAT:7.483|ADR:7.655|LUN:NA|HTH:7.532|SPL:7.51|MUS:7.6|LIV:7.49|KID:7.844|PIT:7.516	TRUE	FALSE
ESR1	cluster_H	ESR1 21235772 ChIP-Seq MCF-7 Human	2/200	0.00959001	0.216917	15.375	71.446	GDF15;ATP1B1	top21	TRUE	ESR1	FAT:NA|ADR:NA|LUN:NA|HTH:NA|SPL:NA|MUS:NA|LIV:22.157|KID:NA|PIT:30.934	FAT:10.582|ADR:9.21|LUN:NA|HTH:8.576|SPL:8.057|MUS:10.453|LIV:9.665|KID:9.386|PIT:11.323	FALSE	TRUE
NR1I2	cluster_H	NR1I2 20693526 ChIP-Seq LIVER Mouse	3/631	0.0107124	0.226582	7.706	34.956	GDF15;INSIG2;RARRES1	top22	TRUE	NR1I2	FAT:NA|ADR:NA|LUN:NA|HTH:NA|SPL:NA|MUS:NA|LIV:98.869|KID:NA|PIT:NA	FAT:7.541|ADR:7.633|LUN:NA|HTH:7.561|SPL:7.532|MUS:8.028|LIV:11.198|KID:8.497|PIT:7.618	TRUE	TRUE
SOX2	cluster_H	SOX2 20726797 ChIP-Seq SW620 Human	5/1931	0.0109713	0.226582	4.688	21.155	FAM89A;RARRES1;ATP1B1;PKIG;DUSP14	top23	FALSE	SOX2	FAT:NA|ADR:NA|LUN:NA|HTH:64.448|SPL:NA|MUS:NA|LIV:NA|KID:NA|PIT:25.59	FAT:8.007|ADR:7.668|LUN:NA|HTH:9.112|SPL:7.868|MUS:7.815|LIV:8.148|KID:7.91|PIT:8.309	TRUE	TRUE
SUZ12	cluster_H	SUZ12 27294783 Chip-Seq NPCs Mouse	3/658	0.0120021	0.231818	7.378	32.63	SERPINE2;INSIG2;ATP1B1	top24	FALSE	SUZ12	FAT:26.121|ADR:25.605|LUN:30.633|HTH:15.493|SPL:35.385|MUS:12.387|LIV:15.423|KID:NA|PIT:23.595	FAT:11.658|ADR:11.925|LUN:NA|HTH:11.585|SPL:12.494|MUS:11.249|LIV:11.418|KID:11.83|PIT:11.709	FALSE	TRUE
HIF1A	cluster_H	HIF1A 21447827 ChIP-Seq MCF-7 Human	2/248	0.0144572	0.231818	12.345	52.299	GDF15;INSIG2	top25	FALSE	HIF1A	FAT:169.163|ADR:286.29|LUN:220.182|HTH:61.168|SPL:128.797|MUS:17.765|LIV:44.831|KID:NA|PIT:97.684	FAT:8.471|ADR:9.072|LUN:NA|HTH:9.197|SPL:8.755|MUS:8.364|LIV:8.575|KID:8.519|PIT:8.65	TRUE	TRUE
CEBPD	cluster_H	CEBPD 21427703 ChIP-Seq 3T3-L1 Mouse	4/1349	0.0154273	0.231818	5.04	21.023	SLC25A15;SERPINE2;INSIG2;DUSP14	top26	FALSE	CEBPD	FAT:327.483|ADR:88.103|LUN:221.259|HTH:36.354|SPL:155.305|MUS:95.252|LIV:140.356|KID:NA|PIT:180.382	FAT:7.564|ADR:7.582|LUN:NA|HTH:7.464|SPL:7.631|MUS:7.724|LIV:7.564|KID:7.568|PIT:7.723	TRUE	FALSE
FOXP2	cluster_H	FOXP2 21765815 ChIP-ChIP NEURO2A Mouse	3/726	0.015639	0.231818	6.66	27.694	WFDC12;ATP1B1;PKIG	top27	FALSE	FOXP2	FAT:NA|ADR:NA|LUN:NA|HTH:NA|SPL:NA|MUS:NA|LIV:NA|KID:NA|PIT:NA	FAT:7.694|ADR:7.977|LUN:NA|HTH:8.433|SPL:7.654|MUS:7.632|LIV:7.851|KID:7.651|PIT:8.21	FALSE	TRUE
NFE2	cluster_H	NFE2 27457419 Chip-Seq LIVER Mouse	3/735	0.0161627	0.231818	6.575	27.124	SERPINE2;INSIG2;ATP1B1	top28	FALSE		LIV:NA	LIV:NA	FALSE	FALSE
TP53	cluster_H	TP53 22127205 ChIP-Seq IMR90 Human	3/766	0.0180432	0.231818	6.298	25.287	SLC25A15;GDF15;RARRES1	top29	FALSE	TRP53	FAT:NA|ADR:NA|LUN:NA|HTH:NA|SPL:NA|MUS:NA|LIV:NA|KID:NA|PIT:NA	FAT:9.395|ADR:10.582|LUN:NA|HTH:9.668|SPL:11.31|MUS:9.539|LIV:9.822|KID:9.745|PIT:10.217	FALSE	TRUE
RUNX1	cluster_H	RUNX1 27457419 Chip-Seq LIVER Mouse	4/1475	0.0208335	0.231818	4.577	17.717	SERPINE2;INSIG2;ATP1B1;PKIG	top30	FALSE	RUNX1	FAT:59.245|ADR:14.442|LUN:91.415|HTH:NA|SPL:44.823|MUS:39.807|LIV:13.6|KID:NA|PIT:25.275	FAT:7.769|ADR:7.977|LUN:NA|HTH:7.835|SPL:8.629|MUS:7.763|LIV:7.794|KID:7.745|PIT:7.75	TRUE	TRUE
SMAD1	cluster_H	SMAD1 18555785 Chip-Seq ESCs Mouse	4/1483	0.0212125	0.231818	4.55	17.532	WFDC12;SERPINE2;INSIG2;ATP1B1	top31	FALSE	SMAD1	FAT:15.423|ADR:NA|LUN:12.074|HTH:NA|SPL:NA|MUS:11.425|LIV:NA|KID:NA|PIT:10.295	FAT:10.934|ADR:10.851|LUN:NA|HTH:10.332|SPL:9.619|MUS:10.388|LIV:10.505|KID:9.825|PIT:10.926	FALSE	TRUE
ZFX	cluster_H	ZFX 18555785 Chip-Seq ESCs Mouse	4/1485	0.0213079	0.231818	4.543	17.486	SERPINE2;INSIG2;ATP1B1;PKIG	top32	FALSE	ZFX	FAT:33.391|ADR:22.191|LUN:30.381|HTH:13.878|SPL:36.307|MUS:29.547|LIV:18.069|KID:NA|PIT:27.387	FAT:10.641|ADR:10.895|LUN:NA|HTH:10.194|SPL:11.107|MUS:10.581|LIV:10.335|KID:10.373|PIT:10.798	FALSE	TRUE
KLF4	cluster_H	KLF4 18555785 Chip-Seq ESCs Mouse	4/1486	0.0213557	0.231818	4.54	17.463	SERPINE2;INSIG2;ATP1B1;PKIG	top33	FALSE	KLF4	FAT:222.672|ADR:32.645|LUN:183.608|HTH:11.975|SPL:80.849|MUS:23.755|LIV:NA|KID:NA|PIT:22.653	FAT:10.572|ADR:8.77|LUN:NA|HTH:8.333|SPL:8.737|MUS:9.745|LIV:8.333|KID:8.912|PIT:8.471	TRUE	TRUE
CTCF	cluster_H	CTCF 18555785 Chip-Seq ESCs Mouse	4/1492	0.021644	0.231818	4.52	17.326	SERPINE2;INSIG2;ATP1B1;PKIG	top35	FALSE	CTCF	FAT:38.255|ADR:31.72|LUN:38.483|HTH:25.258|SPL:52.024|MUS:34.038|LIV:19.431|KID:NA|PIT:33.605	FAT:10.174|ADR:10.54|LUN:NA|HTH:10.095|SPL:11.249|MUS:10.172|LIV:10.004|KID:10.241|PIT:10.401	TRUE	TRUE
OCT4	cluster_H	OCT4 18555785 Chip-Seq ESCs Mouse	4/1492	0.021644	0.231818	4.52	17.326	SERPINE2;INSIG2;ATP1B1;PKIG	top34	FALSE	POU5F1	FAT:NA|ADR:NA|LUN:NA|HTH:NA|SPL:NA|MUS:NA|LIV:NA|KID:NA|PIT:NA	FAT:8.022|ADR:7.925|LUN:NA|HTH:7.917|SPL:8.231|MUS:8.23|LIV:8.082|KID:7.875|PIT:8.217	FALSE	TRUE
STAT3	cluster_H	STAT3 18555785 Chip-Seq ESCs Mouse	4/1495	0.0217891	0.231818	4.51	17.259	SERPINE2;INSIG2;ATP1B1;PKIG	top36	TRUE	STAT3	FAT:340.576|ADR:211.046|LUN:379.986|HTH:84.265|SPL:245.921|MUS:202.483|LIV:253.363|KID:NA|PIT:215.108	FAT:11.883|ADR:11.373|LUN:NA|HTH:10.396|SPL:11.569|MUS:11.368|LIV:11.861|KID:11.161|PIT:11.776	TRUE	TRUE
FLI1	cluster_H	FLI1 21867929 ChIP-Seq TH2 Mouse	4/1496	0.0218376	0.231818	4.507	17.236	IGFBP1;RSPH4A;LRTM1;DUSP14	top38	FALSE	FLI1	FAT:50.55|ADR:NA|LUN:69.071|HTH:10.259|SPL:154.592|MUS:NA|LIV:NA|KID:NA|PIT:NA	FAT:8.196|ADR:8.497|LUN:NA|HTH:7.802|SPL:9.203|MUS:8.126|LIV:8.048|KID:7.835|PIT:7.668	TRUE	TRUE
ESRRB	cluster_H	ESRRB 18555785 Chip-Seq ESCs Mouse	4/1496	0.0218376	0.231818	4.507	17.236	SERPINE2;INSIG2;ATP1B1;PKIG	top37	TRUE	ESRRB	FAT:NA|ADR:NA|LUN:NA|HTH:NA|SPL:NA|MUS:NA|LIV:NA|KID:NA|PIT:NA	FAT:8.248|ADR:7.986|LUN:NA|HTH:8.509|SPL:7.939|MUS:9.418|LIV:8.624|KID:11.303|PIT:8.089	FALSE	TRUE
SOX6	cluster_H	SOX6 21985497 ChIP-Seq MYOTUBES Mouse	4/1504	0.022228	0.231818	4.481	17.057	RSPH4A;SERPINE2;INSIG2;ATP1B1	top39	FALSE	SOX6	LIV:NA	LIV:8.982	FALSE	TRUE
EBF1	cluster_H	EBF1 22473956 ChIP-Seq LYMPHODE Mouse	4/1505	0.0222771	0.231818	4.478	17.035	SERPINE2;INSIG2;RARRES1;ATP1B1	top40	FALSE	EBF1	FAT:70.675|ADR:NA|LUN:15.444|HTH:NA|SPL:16.021|MUS:NA|LIV:NA|KID:NA|PIT:NA	FAT:9.798|ADR:9.314|LUN:NA|HTH:8.121|SPL:8.034|MUS:8.784|LIV:7.831|KID:8.254|PIT:8.052	TRUE	TRUE
SMARCA4	cluster_H	SMARCA4 20176728 ChIP-ChIP TSCs Mouse	3/830	0.0223052	0.231818	5.791	22.024	SERPINE2;INSIG2;DUSP14	top41	FALSE	SMARCA4	FAT:65.566|ADR:82.137|LUN:92.273|HTH:81.139|SPL:86.956|MUS:56.577|LIV:31.814|KID:NA|PIT:103.98	FAT:9.079|ADR:9.042|LUN:NA|HTH:9.104|SPL:9.6|MUS:9.105|LIV:9.021|KID:8.751|PIT:9.377	TRUE	TRUE
SOX2	cluster_H	SOX2 18555785 Chip-Seq ESCs Mouse	4/1508	0.0224249	0.231818	4.468	16.969	SERPINE2;INSIG2;ATP1B1;PKIG	top42	FALSE	SOX2	FAT:NA|ADR:NA|LUN:NA|HTH:64.448|SPL:NA|MUS:NA|LIV:NA|KID:NA|PIT:25.59	FAT:8.007|ADR:7.668|LUN:NA|HTH:9.112|SPL:7.868|MUS:7.815|LIV:8.148|KID:7.91|PIT:8.309	TRUE	TRUE
NMYC	cluster_H	NMYC 18555785 Chip-Seq ESCs Mouse	4/1510	0.0225237	0.231818	4.462	16.925	SERPINE2;INSIG2;ATP1B1;PKIG	top43	FALSE	MYCN	FAT:NA|ADR:NA|LUN:NA|HTH:NA|SPL:NA|MUS:NA|LIV:NA|KID:NA|PIT:NA	FAT:7.601|ADR:7.639|LUN:NA|HTH:7.484|SPL:7.449|MUS:7.403|LIV:7.505|KID:7.536|PIT:7.535	FALSE	FALSE
PU1	cluster_H	PU1 27457419 Chip-Seq LIVER Mouse	4/1510	0.0225237	0.231818	4.462	16.925	SERPINE2;INSIG2;ATP1B1;PKIG	top44	FALSE	SPI1	FAT:28.676|ADR:15.336|LUN:89.426|HTH:NA|SPL:150.697|MUS:NA|LIV:NA|KID:NA|PIT:NA	FAT:8.215|ADR:7.821|LUN:NA|HTH:7.698|SPL:9.182|MUS:7.894|LIV:8.12|KID:7.953|PIT:7.707	TRUE	TRUE
RUNX1	cluster_H	RUNX1 21571218 ChIP-Seq MEGAKARYOCYTES Human	7/4172	0.022544	0.231818	3.324	12.604	SLC25A15;SERPINE2;GDF15;INSIG2;ATP1B1;PKIG;DUSP14	top45	FALSE	RUNX1	FAT:59.245|ADR:14.442|LUN:91.415|HTH:NA|SPL:44.823|MUS:39.807|LIV:13.6|KID:NA|PIT:25.275	FAT:7.769|ADR:7.977|LUN:NA|HTH:7.835|SPL:8.629|MUS:7.763|LIV:7.794|KID:7.745|PIT:7.75	TRUE	TRUE
CDX2	cluster_H	CDX2 21402776 ChIP-Seq INTESTINAL-VILLUS Mouse	4/1514	0.0227223	0.231818	4.449	16.837	IGFBP1;SERPINE2;INSIG2;ATP1B1	top46	FALSE	CDX2	FAT:NA|ADR:NA|LUN:NA|HTH:NA|SPL:NA|MUS:NA|LIV:NA|KID:NA|PIT:NA	FAT:7.765|ADR:7.714|LUN:NA|HTH:7.671|SPL:7.629|MUS:7.528|LIV:8.052|KID:7.687|PIT:7.706	FALSE	TRUE
RARG	cluster_H	RARG 19884340 ChIP-ChIP MEFs Mouse	2/317	0.0229488	0.231818	9.607	36.261	GDF15;DUSP14	top47	TRUE	RARG	FAT:30.244|ADR:27.532|LUN:30.323|HTH:NA|SPL:19.71|MUS:NA|LIV:NA|KID:NA|PIT:19.228	FAT:8.817|ADR:8.53|LUN:NA|HTH:8.04|SPL:8.445|MUS:8.664|LIV:8.447|KID:8.364|PIT:8.738	FALSE	TRUE
E2F1	cluster_H	E2F1 18555785 Chip-Seq ESCs Mouse	4/1528	0.0234258	0.231818	4.405	16.536	SERPINE2;INSIG2;ATP1B1;PKIG	top48	FALSE	E2F1	FAT:NA|ADR:NA|LUN:NA|HTH:NA|SPL:NA|MUS:NA|LIV:NA|KID:NA|PIT:NA	FAT:9.432|ADR:9.6|LUN:NA|HTH:8.879|SPL:11.256|MUS:8.768|LIV:9.235|KID:9.057|PIT:9.51	FALSE	TRUE
SMC3	cluster_H	SMC3 22415368 ChIP-Seq MEFs Mouse	4/1546	0.0243504	0.232814	4.349	16.158	IGFBP1;GDF15;RARRES1;ATP1B1	top49	FALSE	SMC3	FAT:39.404|ADR:30.955|LUN:36.623|HTH:22.5|SPL:44.858|MUS:26.496|LIV:14.383|KID:NA|PIT:39.443	FAT:10.113|ADR:9.841|LUN:NA|HTH:9.385|SPL:9.564|MUS:9.215|LIV:9.016|KID:9.47|PIT:9.967	FALSE	TRUE
SA1	cluster_H	SA1 22415368 ChIP-Seq MEFs Mouse	4/1549	0.0245067	0.232814	4.34	16.097	WFDC12;IGFBP1;RARRES1;ATP1B1	top50	FALSE	STAG1	FAT:47.711|ADR:30.672|LUN:40.663|HTH:20.124|SPL:34.931|MUS:33.721|LIV:16.155|KID:NA|PIT:28.303	FAT:10.516|ADR:10.148|LUN:NA|HTH:9.63|SPL:9.751|MUS:9.815|LIV:9.527|KID:9.862|PIT:9.823	FALSE	TRUE
DPY	cluster_H	DPY 21335234 ChIP-Seq ESCs Mouse	4/1575	0.0258878	0.235655	4.262	15.574	RSPH4A;SERPINE2;GDF15;INSIG2	top51	FALSE	DPY30	FAT:22.806|ADR:36.092|LUN:22.841|HTH:31.953|SPL:25.659|MUS:22.888|LIV:17.795|KID:NA|PIT:29.147	FAT:12.059|ADR:11.947|LUN:NA|HTH:11.613|SPL:11.908|MUS:12.043|LIV:11.692|KID:11.946|PIT:11.815	FALSE	TRUE
FOXH1	cluster_H	FOXH1 21741376 ChIP-Seq EPCs Human	4/1586	0.0264864	0.235655	4.23	15.36	SERPINE2;GDF15;LRTM1;SERPINA5	top52	FALSE	FOXH1	FAT:10.451|ADR:14.016|LUN:16.251|HTH:41.699|SPL:27.57|MUS:NA|LIV:10.315|KID:NA|PIT:45.635	FAT:7.63|ADR:7.546|LUN:NA|HTH:7.558|SPL:7.651|MUS:7.553|LIV:7.544|KID:7.697|PIT:7.497	FALSE	FALSE
TAF2	cluster_H	TAF2 19829295 ChIP-Seq ESCs Human	4/1595	0.0269827	0.235655	4.204	15.188	IGFBP1;GDF15;ATP1B1;PKIG	top53	FALSE	TAF2	FAT:24.999|ADR:25.869|LUN:21.952|HTH:11.923|SPL:24.652|MUS:NA|LIV:11.37|KID:NA|PIT:22.372	FAT:8.69|ADR:9.228|LUN:NA|HTH:9.434|SPL:9.316|MUS:8.922|LIV:9.805|KID:8.777|PIT:8.889	FALSE	TRUE
PCGF2	cluster_H	PCGF2 27294783 Chip-Seq NPCs Mouse	2/346	0.0270075	0.235655	8.784	31.725	SERPINE2;INSIG2	top54	FALSE		LIV:NA	LIV:NA	FALSE	FALSE
SMAD4	cluster_H	SMAD4 21741376 ChIP-Seq EPCs Human	4/1603	0.0274286	0.235655	4.181	15.036	INSIG2;LRTM1;SERPINA5;DUSP14	top55	FALSE	SMAD4	FAT:71.637|ADR:57.013|LUN:79.538|HTH:33.008|SPL:69.169|MUS:71.587|LIV:42.363|KID:NA|PIT:76.606	FAT:12.695|ADR:12.959|LUN:NA|HTH:12.213|SPL:12.963|MUS:12.913|LIV:12.309|KID:12.6|PIT:13.501	TRUE	TRUE
SMAD2/3	cluster_H	SMAD2/3 21741376 ChIP-Seq ESCs Human	4/1612	0.0279357	0.235655	4.156	14.869	GDF15;LRTM1;PKIG;DUSP14	top56	FALSE	SMAD3	FAT:109.688|ADR:24.531|LUN:90.385|HTH:21.12|SPL:69.085|MUS:97.914|LIV:42.992|KID:NA|PIT:69.959	FAT:10.912|ADR:11.258|LUN:NA|HTH:10.262|SPL:11.127|MUS:12.152|LIV:10.247|KID:11.133|PIT:11.284	TRUE	TRUE
TP53	cluster_H	TP53 20018659 ChIP-ChIP R1E Mouse	3/909	0.0282786	0.235655	5.265	18.772	SERPINE2;GDF15;LRTM1	top57	FALSE	TRP53	FAT:NA|ADR:NA|LUN:NA|HTH:NA|SPL:NA|MUS:NA|LIV:NA|KID:NA|PIT:NA	FAT:9.395|ADR:10.582|LUN:NA|HTH:9.668|SPL:11.31|MUS:9.539|LIV:9.822|KID:9.745|PIT:10.217	FALSE	TRUE
RING1B	cluster_H	RING1B 27294783 Chip-Seq NPCs Mouse	4/1632	0.0290835	0.238184	4.1	14.505	SERPINE2;GDF15;INSIG2;ATP1B1	top58	FALSE	RING1	FAT:43.579|ADR:45.316|LUN:48.936|HTH:41.288|SPL:50.382|MUS:21.29|LIV:30.618|KID:NA|PIT:108.14	FAT:9.837|ADR:11.22|LUN:NA|HTH:10.87|SPL:10.435|MUS:10.191|LIV:9.856|KID:10.3|PIT:10.647	TRUE	TRUE
FOXA1	cluster_H	FOXA1 21915096 ChIP-Seq LNCaP-1F5 Human	4/1641	0.0296094	0.23838	4.076	14.345	GDF15;INSIG2;ATP1B1;DUSP14	top59	FALSE	FOXA1	FAT:NA|ADR:NA|LUN:10.206|HTH:NA|SPL:NA|MUS:NA|LIV:26.34|KID:NA|PIT:NA	FAT:8.405|ADR:8.473|LUN:NA|HTH:8.791|SPL:8.254|MUS:8.767|LIV:10.482|KID:8.133|PIT:7.865	FALSE	TRUE
TCF4	cluster_H	TCF4 18268006 ChIP-ChIP LS174T Human	2/372	0.0308776	0.244448	8.156	28.364	FAM89A;ATP1B1	top60	FALSE	TCF4	FAT:174.247|ADR:84.256|LUN:155.473|HTH:55.951|SPL:79.199|MUS:37.905|LIV:10.56|KID:NA|PIT:71.782	FAT:12.504|ADR:13.742|LUN:NA|HTH:13.18|SPL:13.296|MUS:12.831|LIV:11.435|KID:12.227|PIT:13.745	TRUE	TRUE
RACK7	cluster_H	RACK7 27058665 Chip-Seq MCF-7 Human	4/1679	0.0318945	0.247995	3.975	13.695	SLC25A15;GDF15;ATP1B1;DUSP14	top61	FALSE	ZMYND8	FAT:36.191|ADR:100.545|LUN:40.548|HTH:50.521|SPL:65.392|MUS:27.004|LIV:19.02|KID:NA|PIT:98.828	FAT:11.329|ADR:12.162|LUN:NA|HTH:12.801|SPL:12.644|MUS:11.137|LIV:11.182|KID:11.94|PIT:13.392	TRUE	TRUE
TAL1	cluster_H	TAL1 26923725 Chip-Seq MACROPHAGESS Mouse	1/44	0.0325076	0.247995	33.126	113.5	SLC25A15	top62	FALSE	TAL1	FAT:24.56|ADR:NA|LUN:46.158|HTH:NA|SPL:25.843|MUS:NA|LIV:NA|KID:NA|PIT:NA	FAT:8.414|ADR:8.177|LUN:NA|HTH:8.381|SPL:11.974|MUS:8.123|LIV:7.933|KID:7.989|PIT:7.679	FALSE	TRUE
PCGF2	cluster_H	PCGF2 27294783 Chip-Seq ESCs Mouse	2/385	0.0328919	0.247995	7.874	26.886	SERPINE2;INSIG2	top63	FALSE		LIV:NA	LIV:NA	FALSE	FALSE
FOXA2	cluster_H	FOXA2 19822575 ChIP-Seq HepG2 Human	5/2553	0.0336421	0.249687	3.422	11.606	IGFBP1;GDF15;INSIG2;PKIG;SERPINA5	top64	FALSE	FOXA2	FAT:NA|ADR:NA|LUN:14.133|HTH:NA|SPL:NA|MUS:NA|LIV:28.406|KID:NA|PIT:NA	FAT:7.622|ADR:7.723|LUN:NA|HTH:7.7|SPL:7.468|MUS:7.887|LIV:9.584|KID:7.522|PIT:7.52	FALSE	TRUE
SOX9	cluster_H	SOX9 26525672 Chip-Seq Limbbuds Mouse	3/993	0.0354981	0.259409	4.797	16.013	SERPINE2;INSIG2;DUSP14	top65	FALSE	SOX9	FAT:NA|ADR:NA|LUN:NA|HTH:55.137|SPL:NA|MUS:NA|LIV:NA|KID:NA|PIT:31.774	FAT:9.148|ADR:9.427|LUN:NA|HTH:12.742|SPL:8.915|MUS:10.244|LIV:10.53|KID:8.553|PIT:10.932	TRUE	TRUE
STAT3	cluster_H	STAT3 23295773 ChIP-Seq U87 Human	5/2637	0.0380922	0.274149	3.297	10.772	SERPINE2;FAM89A;RARRES1;PKIG;DUSP14	top66	TRUE	STAT3	FAT:340.576|ADR:211.046|LUN:379.986|HTH:84.265|SPL:245.921|MUS:202.483|LIV:253.363|KID:NA|PIT:215.108	FAT:11.883|ADR:11.373|LUN:NA|HTH:10.396|SPL:11.569|MUS:11.368|LIV:11.861|KID:11.161|PIT:11.776	TRUE	TRUE
EZH2	cluster_H	EZH2 27294783 Chip-Seq NPCs Mouse	3/1032	0.0391533	0.27758	4.605	14.923	SERPINE2;INSIG2;ATP1B1	top67	FALSE	EZH2	FAT:NA|ADR:NA|LUN:10.854|HTH:NA|SPL:17.294|MUS:NA|LIV:NA|KID:NA|PIT:NA	FAT:8.677|ADR:8.665|LUN:NA|HTH:8.642|SPL:10.198|MUS:8.543|LIV:8.721|KID:8.742|PIT:8.232	FALSE	TRUE
RUNX2	cluster_H	RUNX2 22187159 ChIP-Seq PCA Human	5/2722	0.0429683	0.300146	3.178	10.001	SERPINE2;GDF15;INSIG2;PKIG;SERPINA5	top68	FALSE	RUNX2	FAT:NA|ADR:NA|LUN:10.52|HTH:NA|SPL:11.345|MUS:NA|LIV:NA|KID:NA|PIT:NA	FAT:7.726|ADR:7.531|LUN:NA|HTH:7.676|SPL:7.522|MUS:7.608|LIV:7.615|KID:7.56|PIT:7.583	FALSE	FALSE
ESRRB	cluster_H	ESRRB 18555785 ChIP-Seq MESCs Mouse	3/1081	0.0440167	0.303013	4.385	13.694	SLC25A15;GDF15;ATP1B1	top69	TRUE	ESRRB	FAT:NA|ADR:NA|LUN:NA|HTH:NA|SPL:NA|MUS:NA|LIV:NA|KID:NA|PIT:NA	FAT:8.248|ADR:7.986|LUN:NA|HTH:8.509|SPL:7.939|MUS:9.418|LIV:8.624|KID:11.303|PIT:8.089	FALSE	TRUE
REST	cluster_H	REST 19997604 ChIP-ChIP NEURONS Mouse	3/1095	0.0454613	0.304142	4.325	13.369	INSIG2;PKIG;SERPINA5	top70	FALSE	REST	FAT:23.732|ADR:23.018|LUN:23.858|HTH:NA|SPL:27.747|MUS:12.798|LIV:14.528|KID:NA|PIT:NA	FAT:7.646|ADR:7.567|LUN:NA|HTH:7.434|SPL:7.565|MUS:7.498|LIV:7.599|KID:7.676|PIT:7.433	FALSE	FALSE
RCOR1	cluster_H	RCOR1 19997604 ChIP-ChIP NEURONS Mouse	3/1095	0.0454613	0.304142	4.325	13.369	INSIG2;PKIG;SERPINA5	top71	FALSE	RCOR1	FAT:33.001|ADR:20.668|LUN:52.538|HTH:10.908|SPL:31.997|MUS:22.971|LIV:16.925|KID:NA|PIT:22.703	FAT:9.049|ADR:9.448|LUN:NA|HTH:8.474|SPL:9.465|MUS:8.838|LIV:9.318|KID:9.837|PIT:9.139	TRUE	TRUE
RELA	cluster_H	RELA 24523406 ChIP-Seq FIBROSARCOMA Human	3/1104	0.0464028	0.305532	4.288	13.166	IGFBP1;SERPINE2;RARRES1	top72	FALSE	RELA	FAT:110.885|ADR:69.248|LUN:133.105|HTH:32.047|SPL:115.164|MUS:64.616|LIV:59.016|KID:NA|PIT:71.658	FAT:12.062|ADR:12.36|LUN:NA|HTH:10.626|SPL:12.176|MUS:11.137|LIV:11.68|KID:11.116|PIT:11.344	TRUE	TRUE
ZNF263	cluster_H	ZNF263 19887448 ChIP-Seq K562 Human	1/64	0.0469554	0.305532	22.587	69.085	GDF15	top73	FALSE		LIV:NA	LIV:NA	FALSE	FALSE
BACH1	cluster_H	BACH1 22875853 ChIP-PCR HELA AND SCP4 Human	3/1127	0.0488544	0.313593	4.195	12.665	IGFBP1;GDF15;ATP1B1	top74	FALSE	BACH1	FAT:39.68|ADR:20.115|LUN:57.459|HTH:11.44|SPL:37.866|MUS:46.595|LIV:21.027|KID:NA|PIT:13.834	FAT:8.168|ADR:7.955|LUN:NA|HTH:8.035|SPL:8.245|MUS:9.01|LIV:9.495|KID:8.795|PIT:8.192	TRUE	TRUE

## Sheet: I
Gene expression changes in cluster I occur in the following tissues: ADR, FAT, HTH, KID, LIV, MUS, PIT, SPL, LUN.
TF	cluster	Term	Overlap	P.value	Adjusted.P.value	Odds.Ratio	Combined.Score	Genes	TF_rank	nuclear_receptors	mapped_name	tissue_cpm_gtex	tissue_log2_microarray	pattern_tissue_colocalization_gtex	pattern_tissue_colocalization_microarray
RXR	cluster_I	RXR 22158963 ChIP-Seq LIVER Mouse	14/1546	3.66185e-09	2.23373e-06	12.037	233.814	AMBP;AHSG;FGG;APOA2;APOA1;SNX10;KLF15;TSKU;LRG1;APOC1;TMCC3;PIM3;EPPK1;ANGPTL4	top1	TRUE	RXRA	FAT:132.69|ADR:129.546|LUN:90.793|HTH:59.489|SPL:141.53|MUS:235.963|LIV:227.376|KID:NA|PIT:128.713	FAT:9.134|ADR:8.297|LUN:NA|HTH:8.121|SPL:8.228|MUS:8.958|LIV:10.024|KID:9.071|PIT:7.911	TRUE	TRUE
PPARA	cluster_I	PPARA 22158963 ChIP-Seq LIVER Mouse	12/1552	4.30004e-07	0.000104629	8.977	131.593	ALAS1;LRG1;AMBP;FGG;APOC1;APOA2;APOA1;PIM3;EPPK1;ANGPTL4;KLF15;TSKU	top2	TRUE	PPARA	FAT:30.052|ADR:36.633|LUN:20.511|HTH:18.688|SPL:20.631|MUS:57.029|LIV:110.083|KID:NA|PIT:19.972	FAT:7.933|ADR:8.027|LUN:NA|HTH:7.578|SPL:7.47|MUS:8.145|LIV:9.407|KID:8.48|PIT:7.538	TRUE	TRUE
LXR	cluster_I	LXR 22158963 ChIP-Seq LIVER Mouse	12/1578	5.14568e-07	0.000104629	8.815	127.643	ALAS1;AMBP;AHSG;FGG;APOA2;APOA1;PIM3;EPPK1;SGK1;KLF15;TSKU;TNS1	top3	TRUE	NR1H3	FAT:85.357|ADR:27.267|LUN:41.438|HTH:NA|SPL:91.42|MUS:NA|LIV:61.118|KID:NA|PIT:13.787	FAT:12.356|ADR:10.386|LUN:NA|HTH:8.746|SPL:12.001|MUS:10.815|LIV:12.363|KID:11.505|PIT:9.269	TRUE	TRUE
FOXO1	cluster_I	FOXO1 23066095 ChIP-Seq LIVER Mouse	6/276	1.90918e-06	0.00029115	19.901	262.073	ALAS1;SNX10;PIM3;KLF15;TSKU;TNS1	top4	FALSE	FOXO1	FAT:104.15|ADR:28.44|LUN:68.138|HTH:13.875|SPL:40.232|MUS:178.519|LIV:28.209|KID:NA|PIT:32.602	FAT:10.462|ADR:9.696|LUN:NA|HTH:9.256|SPL:10.657|MUS:10.051|LIV:10.275|KID:10.062|PIT:10.193	TRUE	TRUE
NR3C1	cluster_I	NR3C1 34362910 ChIP-Seq WistarRat Hippocampus	7/647	2.34855e-05	0.00286523	10.069	107.324	SMOX;PLIN4;WBP1L;ANGPTL4;SGK1;KLF15;TNS1	top5	TRUE	NR3C1	FAT:90.796|ADR:22.305|LUN:74.366|HTH:32.889|SPL:46.401|MUS:75.227|LIV:37.687|KID:NA|PIT:64.784	FAT:7.997|ADR:7.926|LUN:NA|HTH:7.918|SPL:7.842|MUS:7.992|LIV:8.027|KID:7.9|PIT:7.872	TRUE	TRUE
NR3C1	cluster_I	NR3C1 34362910 ChIP-Seq WistarRat Hippocampus Stress	7/709	4.21691e-05	0.00419536	9.15	92.176	SMOX;PLIN4;WBP1L;ANGPTL4;SGK1;KLF15;TNS1	top6	TRUE	NR3C1	FAT:90.796|ADR:22.305|LUN:74.366|HTH:32.889|SPL:46.401|MUS:75.227|LIV:37.687|KID:NA|PIT:64.784	FAT:7.997|ADR:7.926|LUN:NA|HTH:7.918|SPL:7.842|MUS:7.992|LIV:8.027|KID:7.9|PIT:7.872	TRUE	TRUE
FOXA1	cluster_I	FOXA1 33576154 ChIP-Seq Human Lung ProstateCancer	15/3825	4.81435e-05	0.00419536	4.895	48.659	ARG2;SERPINA1;ALAS1;SMOX;WBP1L;SNX10;CDKAL1;KLK2;PPP2R3A;KLF15;TSKU;GLB1L2;TMCC3;PIM3;SGK1	top7	FALSE	FOXA1	FAT:NA|ADR:NA|LUN:10.206|HTH:NA|SPL:NA|MUS:NA|LIV:26.34|KID:NA|PIT:NA	FAT:8.405|ADR:8.473|LUN:NA|HTH:8.791|SPL:8.254|MUS:8.767|LIV:10.482|KID:8.133|PIT:7.865	FALSE	TRUE
FOXA1	cluster_I	FOXA1 33576154 ChIP-Seq Human HilarLN ProstateCancer	7/781	7.77777e-05	0.00593055	8.268	78.228	WBP1L;SNX10;PIM3;ANGPTL4;SGK1;KLF15;GLB1L2	top8	FALSE	FOXA1	FAT:NA|ADR:NA|LUN:10.206|HTH:NA|SPL:NA|MUS:NA|LIV:26.34|KID:NA|PIT:NA	FAT:8.405|ADR:8.473|LUN:NA|HTH:8.791|SPL:8.254|MUS:8.767|LIV:10.482|KID:8.133|PIT:7.865	FALSE	TRUE
ESR1	cluster_I	ESR1 20056654 ChIP-Seq MCF-7 Human BreastCancer	7/827	0.000111352	0.00754719	7.785	70.869	SERPINA1;LRG1;HSPB8;APOA1;SNX10;SGK1;TNS1	top9	TRUE	ESR1	FAT:NA|ADR:NA|LUN:NA|HTH:NA|SPL:NA|MUS:NA|LIV:22.157|KID:NA|PIT:30.934	FAT:10.582|ADR:9.21|LUN:NA|HTH:8.576|SPL:8.057|MUS:10.453|LIV:9.665|KID:9.386|PIT:11.323	FALSE	TRUE
PPARG	cluster_I	PPARG 19300518 ChIP-PET 3T3-L1 Mouse	4/191	0.000137911	0.0084126	17.634	156.744	HSPB8;APOC1;PIM3;ANGPTL4	top10	TRUE	PPARG	FAT:126.709|ADR:NA|LUN:22.652|HTH:NA|SPL:13.807|MUS:NA|LIV:NA|KID:NA|PIT:NA	FAT:13.372|ADR:11.26|LUN:NA|HTH:7.99|SPL:9.888|MUS:9.47|LIV:9.801|KID:8.222|PIT:7.832	TRUE	TRUE
AR	cluster_I	AR 21915096 ChIP-Seq LNCaP-1F5 Human	9/1619	0.00024439	0.0129326	5.402	44.93	SERPINA1;SMOX;TMCC3;PIM3;KLK2;SGK1;KLF15;TSKU;GLB1L2	top11	TRUE	AR	FAT:22.63|ADR:NA|LUN:11.074|HTH:NA|SPL:NA|MUS:21.013|LIV:83.029|KID:NA|PIT:16.267	FAT:9.095|ADR:10.105|LUN:NA|HTH:9.013|SPL:8.187|MUS:9.799|LIV:8.087|KID:9.543|PIT:9.329	TRUE	TRUE
POU2F1	cluster_I	POU2F1 35413990 ChIP-Seq Human ARnegCRProstateCancer	5/418	0.000257304	0.0129326	10.295	85.093	CDKAL1;PPP2R3A;SGK1;TSKU;TNS1	top12	FALSE	POU2F1	FAT:24.634|ADR:21.722|LUN:35.531|HTH:22.367|SPL:42.328|MUS:16.879|LIV:11.685|KID:NA|PIT:36.321	FAT:8.941|ADR:9.895|LUN:NA|HTH:10.122|SPL:10.741|MUS:9.331|LIV:9.322|KID:9.711|PIT:10.207	FALSE	TRUE
GF1B	cluster_I	GF1B 26923725 Chip-Seq HPCs Mouse	8/1284	0.000275614	0.0129326	5.861	48.038	AMBP;APOA1;PIM3;EPPK1;PPP2R3A;SGK1;KLF15;TNS1	top13	FALSE	ZNF163B	FAT:NA|ADR:NA|LUN:NA|HTH:NA|SPL:NA|MUS:NA|LIV:NA|KID:NA|PIT:NA	FAT:NA|ADR:NA|LUN:NA|HTH:NA|SPL:NA|MUS:NA|LIV:NA|KID:NA|PIT:NA	FALSE	FALSE
Nerf2	cluster_I	Nerf2 26677805 Chip-Seq MACROPHAGESS Mouse	7/993	0.000344072	0.0149917	6.419	51.186	ALAS1;SMOX;SNX10;CDKAL1;SGK1;TSKU;TNS1	top14	FALSE	NRF2	FAT:NA|ADR:NA|LUN:NA|HTH:NA|SPL:NA|MUS:NA|LIV:NA|KID:NA|PIT:NA	FAT:NA|ADR:NA|LUN:NA|HTH:NA|SPL:NA|MUS:NA|LIV:NA|KID:NA|PIT:NA	FALSE	FALSE
PPARG	cluster_I	PPARG 20176806 ChIP-Seq 3T3-L1 Mouse	8/1369	0.000425906	0.0173202	5.47	42.453	ARG2;SMOX;TMCC3;SNX10;PIM3;EPPK1;KLF15;TNS1	top15	TRUE	PPARG	FAT:126.709|ADR:NA|LUN:22.652|HTH:NA|SPL:13.807|MUS:NA|LIV:NA|KID:NA|PIT:NA	FAT:13.372|ADR:11.26|LUN:NA|HTH:7.99|SPL:9.888|MUS:9.47|LIV:9.801|KID:8.222|PIT:7.832	TRUE	TRUE
GF1	cluster_I	GF1 26923725 Chip-Seq HPCs Mouse	7/1089	0.000600545	0.0228958	5.819	43.167	AMBP;APOA1;SNX10;PPP2R3A;SGK1;KLF15;TNS1	top16	FALSE	GF1	FAT:NA|ADR:NA|LUN:NA|HTH:NA|SPL:NA|MUS:NA|LIV:NA|KID:NA|PIT:NA	FAT:NA|ADR:NA|LUN:NA|HTH:NA|SPL:NA|MUS:NA|LIV:NA|KID:NA|PIT:NA	FALSE	FALSE
SOX9	cluster_I	SOX9 24532713 ChIP-Seq HFSC Mouse	7/1203	0.00108396	0.0388949	5.233	35.726	HSPB8;APOC1;TMCC3;CDKAL1;PPP2R3A;KLF15;TNS1	top17	FALSE	SOX9	FAT:NA|ADR:NA|LUN:NA|HTH:55.137|SPL:NA|MUS:NA|LIV:NA|KID:NA|PIT:31.774	FAT:9.148|ADR:9.427|LUN:NA|HTH:12.742|SPL:8.915|MUS:10.244|LIV:10.53|KID:8.553|PIT:10.932	TRUE	TRUE
LXR	cluster_I	LXR 22292898 ChIP-Seq THP-1 Human	8/1614	0.00126865	0.042993	4.574	30.51	SERPINA1;ALAS1;APOC1;PLIN4;APOA1;PIM3;EPPK1;TSKU	top18	TRUE	NR1H3	FAT:85.357|ADR:27.267|LUN:41.438|HTH:NA|SPL:91.42|MUS:NA|LIV:61.118|KID:NA|PIT:13.787	FAT:12.356|ADR:10.386|LUN:NA|HTH:8.746|SPL:12.001|MUS:10.815|LIV:12.363|KID:11.505|PIT:9.269	TRUE	TRUE
ESR1	cluster_I	ESR1 17901129 ChIP-ChIP LIVER Mouse	4/354	0.00141198	0.0453321	9.344	61.321	LRG1;FGG;APOA2;PIM3	top19	TRUE	ESR1	FAT:NA|ADR:NA|LUN:NA|HTH:NA|SPL:NA|MUS:NA|LIV:22.157|KID:NA|PIT:30.934	FAT:10.582|ADR:9.21|LUN:NA|HTH:8.576|SPL:8.057|MUS:10.453|LIV:9.665|KID:9.386|PIT:11.323	FALSE	TRUE
KLF4	cluster_I	KLF4 26769127 Chip-Seq PDAC-Cell Line Human	8/1678	0.0016318	0.0483015	4.384	28.135	SERPINA1;ALAS1;HSPB8;TMCC3;PIM3;NPM3;SGK1;TSKU	top20	FALSE	KLF4	FAT:222.672|ADR:32.645|LUN:183.608|HTH:11.975|SPL:80.849|MUS:23.755|LIV:NA|KID:NA|PIT:22.653	FAT:10.572|ADR:8.77|LUN:NA|HTH:8.333|SPL:8.737|MUS:9.745|LIV:8.333|KID:8.912|PIT:8.471	TRUE	TRUE
FOXA2	cluster_I	FOXA2 19822575 ChIP-Seq HepG2 Human	10/2553	0.00166284	0.0483015	3.808	24.366	SERPINA1;ALAS1;AMBP;AHSG;FGG;APOA2;APOA1;CDKAL1;ANGPTL4;TSKU	top21	FALSE	FOXA2	FAT:NA|ADR:NA|LUN:14.133|HTH:NA|SPL:NA|MUS:NA|LIV:28.406|KID:NA|PIT:NA	FAT:7.622|ADR:7.723|LUN:NA|HTH:7.7|SPL:7.468|MUS:7.887|LIV:9.584|KID:7.522|PIT:7.52	FALSE	TRUE
HNF1A	cluster_I	HNF1A 26855178 ChIP-Seq Caco2 Human Colon Adenocarcinoma	4/411	0.00243467	0.0675068	8.012	48.215	SERPINA1;AHSG;APOA2;APOA1	top22	FALSE	HNF1A	FAT:NA|ADR:NA|LUN:NA|HTH:NA|SPL:NA|MUS:NA|LIV:34.526|KID:NA|PIT:NA	FAT:NA|ADR:NA|LUN:NA|HTH:NA|SPL:NA|MUS:NA|LIV:NA|KID:NA|PIT:NA	FALSE	FALSE
FOXP2	cluster_I	FOXP2 23625967 ChIP-Seq PFSK-1 AND SK-N-MC Human	5/733	0.0031799	0.0843366	5.747	33.048	SMOX;PIM3;KLF15;TSKU;TNS1	top23	FALSE	FOXP2	FAT:NA|ADR:NA|LUN:NA|HTH:NA|SPL:NA|MUS:NA|LIV:NA|KID:NA|PIT:NA	FAT:7.694|ADR:7.977|LUN:NA|HTH:8.433|SPL:7.654|MUS:7.632|LIV:7.851|KID:7.651|PIT:8.21	FALSE	TRUE
NR3C2	cluster_I	NR3C2 34362910 ChIP-Seq WistarRat Hippocampus	7/1496	0.00378231	0.0933218	4.138	23.078	SMOX;PLIN4;TMCC3;SGK1;KLF15;GLB1L2;TNS1	top24	TRUE	NR3C2	FAT:14.879|ADR:10.781|LUN:15.544|HTH:11.656|SPL:NA|MUS:11.752|LIV:NA|KID:NA|PIT:24.14	FAT:7.764|ADR:7.55|LUN:NA|HTH:7.678|SPL:7.568|MUS:7.587|LIV:7.639|KID:7.594|PIT:7.663	FALSE	FALSE
HNF4A	cluster_I	HNF4A 19761587 ChIP-ChIP CACO-2 Human	5/771	0.00394901	0.0933218	5.451	30.166	ALAS1;AHSG;APOA2;APOA1;PIM3	top25	TRUE	HNF4A	FAT:NA|ADR:NA|LUN:NA|HTH:NA|SPL:NA|MUS:NA|LIV:182.76|KID:NA|PIT:NA	FAT:8.464|ADR:8.129|LUN:NA|HTH:8.003|SPL:8.282|MUS:9.279|LIV:13.144|KID:13.153|PIT:8.678	TRUE	TRUE
LMO2	cluster_I	LMO2 26923725 Chip-Seq HEMOGENIC-ENDOTHELIUM Mouse	7/1517	0.00408776	0.0933218	4.075	22.414	AMBP;HSPB8;TMCC3;SNX10;ANGPTL4;SGK1;KLF15	top26	FALSE	LMO2	FAT:24.274|ADR:12.937|LUN:41.635|HTH:31.271|SPL:41.595|MUS:20.416|LIV:NA|KID:NA|PIT:29.506	FAT:11.063|ADR:11.887|LUN:NA|HTH:11.308|SPL:14.235|MUS:10.811|LIV:10.227|KID:10.9|PIT:11.715	FALSE	TRUE
FOXA1	cluster_I	FOXA1 33576154 ChIP-Seq Human Liver ProstateCancer	8/1944	0.00413064	0.0933218	3.726	20.456	ARG2;SMOX;WBP1L;SNX10;ANGPTL4;SGK1;KLF15;GLB1L2	top27	FALSE	FOXA1	FAT:NA|ADR:NA|LUN:10.206|HTH:NA|SPL:NA|MUS:NA|LIV:26.34|KID:NA|PIT:NA	FAT:8.405|ADR:8.473|LUN:NA|HTH:8.791|SPL:8.254|MUS:8.767|LIV:10.482|KID:8.133|PIT:7.865	FALSE	TRUE
EBNA1	cluster_I	EBNA1 20929547 Chip-Seq RAJI-cells Human	7/1553	0.00465524	0.101418	3.973	21.333	ALAS1;HSPB8;PLIN4;APOA1;SNX10;KLK2;KLF15	top28	FALSE	EBNA1	FAT:NA|ADR:NA|LUN:NA|HTH:NA|SPL:NA|MUS:NA|LIV:NA|KID:NA|PIT:NA	FAT:NA|ADR:NA|LUN:NA|HTH:NA|SPL:NA|MUS:NA|LIV:NA|KID:NA|PIT:NA	FALSE	FALSE
SMRT	cluster_I	SMRT 22465074 ChIP-Seq MACROPHAGES Mouse	7/1580	0.00511912	0.104287	3.899	20.566	ARG2;AMBP;APOA2;TMCC3;PIM3;ANGPTL4;SGK1	top29	FALSE	NCOR2	FAT:153.237|ADR:181.491|LUN:260.454|HTH:103.327|SPL:146.077|MUS:181.129|LIV:56.651|KID:NA|PIT:383.406	FAT:NA|ADR:NA|LUN:NA|HTH:NA|SPL:NA|MUS:NA|LIV:NA|KID:NA|PIT:NA	TRUE	FALSE
EOMES	cluster_I	EOMES 21245162 ChIP-Seq HESCs Human	5/820	0.00512888	0.104287	5.11	26.944	ARG2;APOA2;PPP2R3A;NPM3;TSKU	top30	FALSE	EOMES	FAT:NA|ADR:NA|LUN:NA|HTH:NA|SPL:22.934|MUS:NA|LIV:NA|KID:NA|PIT:NA	FAT:7.966|ADR:7.631|LUN:NA|HTH:7.596|SPL:8.409|MUS:7.688|LIV:7.868|KID:7.827|PIT:7.61	FALSE	TRUE
EGR1	cluster_I	EGR1 23403033 ChIP-Seq LIVER Mouse	4/516	0.00548525	0.105996	6.335	32.976	HSPB8;FGG;APOA2;WBP1L	top31	FALSE	EGR1	KID:NA|LIV:134.159|PIT:573.028|FAT:1086.418|ADR:197.911|LUN:388.713|HTH:76.237|SPL:69.475|MUS:76.502	KID:10.687|LIV:11.713|PIT:14.37|FAT:11.759|ADR:13.031|LUN:NA|HTH:11.894|SPL:11.45|MUS:11.243	TRUE	TRUE
NCOR	cluster_I	NCOR 22465074 ChIP-Seq MACROPHAGES Mouse	7/1604	0.00556045	0.105996	3.835	19.913	ARG2;AMBP;SMOX;APOC1;APOA2;TMCC3;SGK1	top32	FALSE	NCOR1	FAT:87.699|ADR:72.679|LUN:97.751|HTH:60.418|SPL:89.867|MUS:82.256|LIV:56.268|KID:NA|PIT:100.005	FAT:11.65|ADR:11.615|LUN:NA|HTH:11.32|SPL:12.006|MUS:11.846|LIV:11.382|KID:11.829|PIT:11.923	TRUE	TRUE
MYC	cluster_I	MYC 18555785 ChIP-Seq MESCs Mouse	5/852	0.0060241	0.111355	4.909	25.093	APOC1;SNX10;ANGPTL4;NPM3;TSKU	top33	FALSE	MYC	FAT:326.368|ADR:58.718|LUN:65.632|HTH:NA|SPL:92.701|MUS:36.232|LIV:27.153|KID:NA|PIT:18.176	FAT:8.081|ADR:8.39|LUN:NA|HTH:7.986|SPL:8.469|MUS:7.831|LIV:8.247|KID:8.038|PIT:7.869	TRUE	TRUE
FOXA1	cluster_I	FOXA1 21915096 ChIP-Seq LNCaP-1F5 Human	7/1641	0.00629704	0.112976	3.741	18.958	SERPINA1;ALAS1;AMBP;TMCC3;KLK2;PPP2R3A;KLF15	top34	FALSE	FOXA1	FAT:NA|ADR:NA|LUN:10.206|HTH:NA|SPL:NA|MUS:NA|LIV:26.34|KID:NA|PIT:NA	FAT:8.405|ADR:8.473|LUN:NA|HTH:8.791|SPL:8.254|MUS:8.767|LIV:10.482|KID:8.133|PIT:7.865	FALSE	TRUE
SRY	cluster_I	SRY 25088423 ChIP-ChIP EMBRYONIC GONADS Mouse	9/2614	0.0073383	0.127896	3.158	15.52	ARG2;LRG1;AMBP;HSPB8;PLIN4;EPPK1;SGK1;KLF15;GLB1L2	top35	FALSE	SRY	FAT:NA|ADR:NA|LUN:NA|HTH:NA|SPL:NA|MUS:NA|LIV:NA|KID:NA|PIT:NA	FAT:7.64|ADR:7.554|LUN:NA|HTH:7.477|SPL:7.497|MUS:7.559|LIV:7.579|KID:7.542|PIT:7.596	FALSE	FALSE
TRP63	cluster_I	TRP63 18441228 ChIP-ChIP KERATINOCYTES Mouse	2/99	0.00843154	0.142868	15.761	75.272	HSPB8;EPPK1	top36	FALSE	TRP63	FAT:NA|ADR:NA|LUN:NA|HTH:NA|SPL:NA|MUS:NA|LIV:NA|KID:NA|PIT:NA	FAT:8.814|ADR:8.268|LUN:NA|HTH:8.191|SPL:8.949|MUS:8.709|LIV:7.621|KID:7.967|PIT:8.117	FALSE	TRUE
AR	cluster_I	AR 35413990 ChIP-Seq Human ARposCRProstateCancer	4/594	0.00895178	0.147583	5.475	25.82	WBP1L;PPP2R3A;KLF15;TNS1	top37	TRUE	AR	FAT:22.63|ADR:NA|LUN:11.074|HTH:NA|SPL:NA|MUS:21.013|LIV:83.029|KID:NA|PIT:16.267	FAT:9.095|ADR:10.105|LUN:NA|HTH:9.013|SPL:8.187|MUS:9.799|LIV:8.087|KID:9.543|PIT:9.329	TRUE	TRUE
NFKB1	cluster_I	NFKB1 27076634 ChIP-Seq BEAS2B Human Lung Inflammation	11/3823	0.0105709	0.168678	2.743	12.48	SERPINA1;ALAS1;SMOX;FGG;WBP1L;PIM3;CDKAL1;PPP2R3A;SGK1;KLF15;TNS1	top38	FALSE	NFKB1	FAT:67.417|ADR:39.367|LUN:67.748|HTH:11.635|SPL:63.929|MUS:27.051|LIV:23.261|KID:NA|PIT:24.31	FAT:10.58|ADR:10.972|LUN:NA|HTH:9.99|SPL:12.019|MUS:10.415|LIV:10.281|KID:9.983|PIT:10.296	TRUE	TRUE
PPARG	cluster_I	PPARG 20887899 ChIP-Seq 3T3-L1 Mouse	9/2774	0.0107844	0.168678	2.948	13.353	ARG2;HSPB8;APOA1;TMCC3;SNX10;PIM3;ANGPTL4;KLF15;TNS1	top39	TRUE	PPARG	FAT:126.709|ADR:NA|LUN:22.652|HTH:NA|SPL:13.807|MUS:NA|LIV:NA|KID:NA|PIT:NA	FAT:13.372|ADR:11.26|LUN:NA|HTH:7.99|SPL:9.888|MUS:9.47|LIV:9.801|KID:8.222|PIT:7.832	TRUE	TRUE
CTCF	cluster_I	CTCF 33576154 ChIP-Seq Human PerigastricLN ProstateCancer	8/2328	0.0121533	0.184943	3.043	13.422	ARG2;ALAS1;AHSG;SMOX;SNX10;SGK1;KLF15;TNS1	top40	FALSE	CTCF	FAT:38.255|ADR:31.72|LUN:38.483|HTH:25.258|SPL:52.024|MUS:34.038|LIV:19.431|KID:NA|PIT:33.605	FAT:10.174|ADR:10.54|LUN:NA|HTH:10.095|SPL:11.249|MUS:10.172|LIV:10.004|KID:10.241|PIT:10.401	TRUE	TRUE
NANOG	cluster_I	NANOG 21062744 ChIP-ChIP HESCs Human	4/654	0.0124306	0.184943	4.954	21.738	APOC1;APOA2;SNX10;CDKAL1	top41	FALSE	NANOG	FAT:NA|ADR:NA|LUN:NA|HTH:NA|SPL:NA|MUS:NA|LIV:NA|KID:NA|PIT:NA	FAT:7.604|ADR:7.544|LUN:NA|HTH:7.781|SPL:7.586|MUS:7.815|LIV:7.727|KID:7.692|PIT:7.534	FALSE	FALSE
TRIM28	cluster_I	TRIM28 17542650 ChIP-ChIP NTERA2 Human	4/668	0.0133518	0.193883	4.846	20.917	HSPB8;TMCC3;SGK1;KLF15	top42	FALSE	TRIM28	FAT:146.817|ADR:145.978|LUN:165.394|HTH:74.057|SPL:221.222|MUS:123.993|LIV:78.687|KID:NA|PIT:165.71	FAT:10.707|ADR:11.889|LUN:NA|HTH:11.855|SPL:12.317|MUS:11.002|LIV:11.144|KID:11.009|PIT:11.904	TRUE	TRUE
ESR1	cluster_I	ESR1 26153859 ChIP-Seq T47D Human Breast Carcinoma	6/1452	0.0136671	0.193883	3.494	15	ARG2;SERPINA1;AMBP;AHSG;WBP1L;SNX10	top43	TRUE	ESR1	FAT:NA|ADR:NA|LUN:NA|HTH:NA|SPL:NA|MUS:NA|LIV:22.157|KID:NA|PIT:30.934	FAT:10.582|ADR:9.21|LUN:NA|HTH:8.576|SPL:8.057|MUS:10.453|LIV:9.665|KID:9.386|PIT:11.323	FALSE	TRUE
ESR2	cluster_I	ESR2 21235772 ChIP-Seq MCF-7 Human	3/370	0.0146072	0.202027	6.41	27.092	HSPB8;ANGPTL4;SGK1	top44	TRUE	ESR2	FAT:NA|ADR:12.957|LUN:NA|HTH:NA|SPL:NA|MUS:NA|LIV:NA|KID:NA|PIT:NA	FAT:7.823|ADR:7.618|LUN:NA|HTH:7.913|SPL:7.653|MUS:7.984|LIV:7.785|KID:7.921|PIT:7.682	FALSE	FALSE
SOX2	cluster_I	SOX2 20726797 ChIP-Seq SW620 Human	7/1931	0.0149036	0.202027	3.127	13.152	ARG2;SERPINA1;LRG1;APOC1;SNX10;CDKAL1;EPPK1	top45	FALSE	SOX2	FAT:NA|ADR:NA|LUN:NA|HTH:64.448|SPL:NA|MUS:NA|LIV:NA|KID:NA|PIT:25.59	FAT:8.007|ADR:7.668|LUN:NA|HTH:9.112|SPL:7.868|MUS:7.815|LIV:8.148|KID:7.91|PIT:8.309	TRUE	TRUE
TP63	cluster_I	TP63 23658742 ChIP-Seq EP156T Human	9/2937	0.0154654	0.2036	2.757	11.496	SERPINA1;ALAS1;AMBP;FGG;SNX10;PPP2R3A;SGK1;KLF15;TSKU	top46	FALSE	TRP63	FAT:NA|ADR:NA|LUN:NA|HTH:NA|SPL:NA|MUS:NA|LIV:NA|KID:NA|PIT:NA	FAT:8.814|ADR:8.268|LUN:NA|HTH:8.191|SPL:8.949|MUS:8.709|LIV:7.621|KID:7.967|PIT:8.117	FALSE	TRUE
CLOCK	cluster_I	CLOCK 20551151 ChIP-Seq 293T Human	3/382	0.015901	0.2036	6.204	25.691	ALAS1;PIM3;ANGPTL4	top47	FALSE	CLOCK	FAT:32.414|ADR:30.916|LUN:33.427|HTH:23.548|SPL:23.683|MUS:34.392|LIV:14.331|KID:NA|PIT:43.514	FAT:11.185|ADR:11.201|LUN:NA|HTH:10.786|SPL:10.158|MUS:10.945|LIV:10.903|KID:10.849|PIT:10.983	FALSE	TRUE
PPARG	cluster_I	PPARG 20176806 ChIP-Seq MACROPHAGES Mouse	5/1083	0.016021	0.2036	3.81	15.751	APOA1;TMCC3;SNX10;PIM3;SGK1	top48	TRUE	PPARG	FAT:126.709|ADR:NA|LUN:22.652|HTH:NA|SPL:13.807|MUS:NA|LIV:NA|KID:NA|PIT:NA	FAT:13.372|ADR:11.26|LUN:NA|HTH:7.99|SPL:9.888|MUS:9.47|LIV:9.801|KID:8.222|PIT:7.832	TRUE	TRUE
STAT5A	cluster_I	STAT5A 24692510 ChIP-Seq Epithelium Mouse Mammary	7/1977	0.016813	0.209305	3.046	12.445	ARG2;TMCC3;SNX10;ANGPTL4;KLF15;TSKU;TNS1	top49	FALSE	STAT5A	FAT:118.824|ADR:98.509|LUN:66.159|HTH:16.288|SPL:83.851|MUS:34.006|LIV:11.643|KID:NA|PIT:33.373	FAT:10.391|ADR:9.222|LUN:NA|HTH:8.087|SPL:10.023|MUS:9.23|LIV:9.17|KID:9.132|PIT:9.046	TRUE	TRUE
CEBPB	cluster_I	CEBPB 21427703 ChIP-Seq 3T3-L1 Mouse	6/1531	0.0174032	0.212319	3.299	13.365	APOC1;SNX10;PIM3;ANGPTL4;SGK1;KLF15	top50	FALSE	CEBPB	FAT:176.779|ADR:130.429|LUN:169.177|HTH:17.272|SPL:114.108|MUS:120.021|LIV:132.369|KID:NA|PIT:38.078	FAT:12.864|ADR:13.63|LUN:NA|HTH:10.088|SPL:11.814|MUS:13.486|LIV:13.772|KID:11.979|PIT:12.37	TRUE	TRUE
TCF21	cluster_I	TCF21 26020271 ChIP-Seq HCASMC Human CoronaryArtery	5/1129	0.0188714	0.22159	3.645	14.473	HSPB8;WBP1L;ANGPTL4;TSKU;TNS1	top51	FALSE	TCF21	FAT:26.048|ADR:NA|LUN:177.802|HTH:NA|SPL:100.309|MUS:NA|LIV:NA|KID:NA|PIT:11.916	FAT:8.187|ADR:9.435|LUN:NA|HTH:7.946|SPL:11.405|MUS:7.906|LIV:9.202|KID:10.23|PIT:8.572	TRUE	TRUE
RUNX1	cluster_I	RUNX1 27514584 Chip-Seq MCF-7 Human	6/1568	0.019379	0.22159	3.214	12.676	SMOX;HSPB8;PPP2R3A;SGK1;TSKU;TNS1	top52	FALSE	RUNX1	FAT:59.245|ADR:14.442|LUN:91.415|HTH:NA|SPL:44.823|MUS:39.807|LIV:13.6|KID:NA|PIT:25.275	FAT:7.769|ADR:7.977|LUN:NA|HTH:7.835|SPL:8.629|MUS:7.763|LIV:7.794|KID:7.745|PIT:7.75	TRUE	TRUE
JUND	cluster_I	JUND 26020271 ChIP-Seq SMOOTH MUSCLE Human	6/1573	0.0196575	0.22159	3.203	12.587	ARG2;SMOX;HSPB8;APOC1;PLIN4;PIM3	top53	FALSE	JUND	FAT:299.673|ADR:189.721|LUN:255.783|HTH:169.019|SPL:121.452|MUS:42.657|LIV:122.146|KID:NA|PIT:321.801	FAT:8.51|ADR:8.554|LUN:NA|HTH:9.013|SPL:8.971|MUS:8.551|LIV:8.678|KID:8.824|PIT:9.043	TRUE	TRUE
ESR1	cluster_I	ESR1 26153859 ChIP-Seq MCF-7 Human BreastCancer	10/3597	0.0196928	0.22159	2.538	9.967	ARG2;SERPINA1;HSPB8;WBP1L;APOA1;SNX10;PIM3;EPPK1;SGK1;TNS1	top54	TRUE	ESR1	FAT:NA|ADR:NA|LUN:NA|HTH:NA|SPL:NA|MUS:NA|LIV:22.157|KID:NA|PIT:30.934	FAT:10.582|ADR:9.21|LUN:NA|HTH:8.576|SPL:8.057|MUS:10.453|LIV:9.665|KID:9.386|PIT:11.323	FALSE	TRUE
TP53	cluster_I	TP53 23651856 ChIP-Seq MEFs Mouse	8/2541	0.0199794	0.22159	2.754	10.776	SMOX;HSPB8;TMCC3;PIM3;CDKAL1;PPP2R3A;TSKU;TNS1	top55	FALSE	TRP53	FAT:NA|ADR:NA|LUN:NA|HTH:NA|SPL:NA|MUS:NA|LIV:NA|KID:NA|PIT:NA	FAT:9.395|ADR:10.582|LUN:NA|HTH:9.668|SPL:11.31|MUS:9.539|LIV:9.822|KID:9.745|PIT:10.217	FALSE	TRUE
BRD4	cluster_I	BRD4 27068464 Chip-Seq AML-cells Mouse	6/1597	0.0210334	0.226141	3.151	12.167	ARG2;ALAS1;APOA1;PIM3;NPM3;SGK1	top56	FALSE	BRD4	FAT:98.721|ADR:90.342|LUN:121.249|HTH:47.05|SPL:129.54|MUS:109.833|LIV:66.166|KID:NA|PIT:100.541	FAT:11.671|ADR:12.102|LUN:NA|HTH:12.324|SPL:13.036|MUS:11.504|LIV:11.583|KID:11.637|PIT:12.177	TRUE	TRUE
MYB	cluster_I	MYB 21317192 ChIP-Seq ERMYB Mouse	4/767	0.0211312	0.226141	4.196	16.184	ALAS1;SMOX;SNX10;SGK1	top57	FALSE	MYB	FAT:NA|ADR:NA|LUN:NA|HTH:NA|SPL:NA|MUS:NA|LIV:NA|KID:NA|PIT:NA	FAT:7.858|ADR:7.78|LUN:NA|HTH:7.942|SPL:8.427|MUS:7.986|LIV:7.893|KID:7.846|PIT:8.005	FALSE	TRUE
CTCF	cluster_I	CTCF 33576154 ChIP-Seq Human HilarLN ProstateCancer	10/3649	0.0216523	0.227722	2.494	9.557	ARG2;ALAS1;AHSG;SMOX;TMCC3;SNX10;PPP2R3A;SGK1;KLF15;TNS1	top58	FALSE	CTCF	FAT:38.255|ADR:31.72|LUN:38.483|HTH:25.258|SPL:52.024|MUS:34.038|LIV:19.431|KID:NA|PIT:33.605	FAT:10.174|ADR:10.54|LUN:NA|HTH:10.095|SPL:11.249|MUS:10.172|LIV:10.004|KID:10.241|PIT:10.401	TRUE	TRUE
TET1	cluster_I	TET1 21490601 ChIP-Seq MESCs Mouse	6/1618	0.022291	0.228481	3.106	11.815	ARG2;SMOX;HSPB8;TMCC3;PIM3;TSKU	top59	FALSE	TET1	FAT:NA|ADR:NA|LUN:NA|HTH:NA|SPL:NA|MUS:NA|LIV:NA|KID:NA|PIT:NA	FAT:7.628|ADR:8.047|LUN:NA|HTH:8.449|SPL:8.637|MUS:8.109|LIV:7.603|KID:8.112|PIT:8.958	FALSE	TRUE
ESR1	cluster_I	ESR1 22446102 ChIP-Seq UTERUS Mouse	5/1183	0.0226298	0.228481	3.468	13.14	SMOX;TMCC3;CDKAL1;ANGPTL4;TNS1	top60	TRUE	ESR1	FAT:NA|ADR:NA|LUN:NA|HTH:NA|SPL:NA|MUS:NA|LIV:22.157|KID:NA|PIT:30.934	FAT:10.582|ADR:9.21|LUN:NA|HTH:8.576|SPL:8.057|MUS:10.453|LIV:9.665|KID:9.386|PIT:11.323	FALSE	TRUE
CTCF	cluster_I	CTCF 33576154 ChIP-Seq Human Liver ProstateCancer	10/3679	0.0228481	0.228481	2.469	9.328	ARG2;AHSG;SMOX;SNX10;PIM3;CDKAL1;PPP2R3A;SGK1;KLF15;TSKU	top61	FALSE	CTCF	FAT:38.255|ADR:31.72|LUN:38.483|HTH:25.258|SPL:52.024|MUS:34.038|LIV:19.431|KID:NA|PIT:33.605	FAT:10.174|ADR:10.54|LUN:NA|HTH:10.095|SPL:11.249|MUS:10.172|LIV:10.004|KID:10.241|PIT:10.401	TRUE	TRUE
MYCN	cluster_I	MYCN 19997598 ChIP-ChIP NEUROBLASTOMA Human	2/169	0.0232347	0.228599	9.123	34.32	KLK2;TNS1	top62	FALSE	MYCN	FAT:NA|ADR:NA|LUN:NA|HTH:NA|SPL:NA|MUS:NA|LIV:NA|KID:NA|PIT:NA	FAT:7.601|ADR:7.639|LUN:NA|HTH:7.484|SPL:7.449|MUS:7.403|LIV:7.505|KID:7.536|PIT:7.535	FALSE	FALSE
CREB1	cluster_I	CREB1 26743006 Chip-Seq LNCaP Human	6/1645	0.0239832	0.230466	3.051	11.38	AHSG;SMOX;APOA1;EPPK1;ANGPTL4;SGK1	top63	FALSE	CREB1	FAT:37.273|ADR:20.423|LUN:38.816|HTH:19.525|SPL:42.107|MUS:11.625|LIV:11.903|KID:NA|PIT:27.008	FAT:7.94|ADR:8.493|LUN:NA|HTH:9.068|SPL:8.526|MUS:8.394|LIV:8.052|KID:8.178|PIT:8.375	FALSE	TRUE
FOXA1	cluster_I	FOXA1 25552417 ChIP-Seq VCAP Human	6/1650	0.024306	0.230466	3.04	11.302	AMBP;FGG;TMCC3;CDKAL1;PPP2R3A;KLF15	top64	FALSE	FOXA1	FAT:NA|ADR:NA|LUN:10.206|HTH:NA|SPL:NA|MUS:NA|LIV:26.34|KID:NA|PIT:NA	FAT:8.405|ADR:8.473|LUN:NA|HTH:8.791|SPL:8.254|MUS:8.767|LIV:10.482|KID:8.133|PIT:7.865	FALSE	TRUE
GATA1	cluster_I	GATA1 21571218 ChIP-Seq MEGAKARYOCYTES Human	7/2132	0.0245578	0.230466	2.8	10.377	ALAS1;SMOX;SNX10;CDKAL1;PPP2R3A;SGK1;TNS1	top65	FALSE	GATA1	FAT:NA|ADR:NA|LUN:NA|HTH:NA|SPL:NA|MUS:NA|LIV:NA|KID:NA|PIT:NA	FAT:8.188|ADR:8.019|LUN:NA|HTH:7.797|SPL:9.354|MUS:7.96|LIV:7.701|KID:7.752|PIT:7.831	FALSE	TRUE
RACK7	cluster_I	RACK7 27058665 Chip-Seq MCF-7 Human	6/1679	0.0262373	0.240904	2.983	10.86	LRG1;HSPB8;APOA1;PIM3;KLK2;TSKU	top66	FALSE	ZMYND8	FAT:36.191|ADR:100.545|LUN:40.548|HTH:50.521|SPL:65.392|MUS:27.004|LIV:19.02|KID:NA|PIT:98.828	FAT:11.329|ADR:12.162|LUN:NA|HTH:12.801|SPL:12.644|MUS:11.137|LIV:11.182|KID:11.94|PIT:13.392	TRUE	TRUE
ERA	cluster_I	ERA 27197147 Chip-Seq ENDOMETRIOID-ADENOCARCINOMA Human	4/822	0.0264599	0.240904	3.903	14.175	SERPINA1;AMBP;HSPB8;TSKU	top67	FALSE	ESR1	FAT:NA|ADR:NA|LUN:NA|HTH:NA|SPL:NA|MUS:NA|LIV:22.157|KID:NA|PIT:30.934	FAT:10.582|ADR:9.21|LUN:NA|HTH:8.576|SPL:8.057|MUS:10.453|LIV:9.665|KID:9.386|PIT:11.323	FALSE	TRUE
ELK3	cluster_I	ELK3 25401928 ChIP-Seq HUVEC Human	6/1689	0.0269269	0.24155	2.964	10.713	SMOX;APOA1;PIM3;ANGPTL4;SGK1;TNS1	top68	FALSE	ELK3	FAT:83.186|ADR:27.237|LUN:53.614|HTH:11.362|SPL:53.823|MUS:NA|LIV:NA|KID:NA|PIT:18.901	FAT:10.992|ADR:11.359|LUN:NA|HTH:9.545|SPL:11.511|MUS:10.695|LIV:10.352|KID:10.64|PIT:11.121	TRUE	TRUE
SMAD3	cluster_I	SMAD3 22036565 ChIP-Seq ESCs Mouse	4/844	0.0288011	0.254619	3.796	13.466	HSPB8;SNX10;SGK1;TNS1	top69	FALSE	SMAD3	FAT:109.688|ADR:24.531|LUN:90.385|HTH:21.12|SPL:69.085|MUS:97.914|LIV:42.992|KID:NA|PIT:69.959	FAT:10.912|ADR:11.258|LUN:NA|HTH:10.262|SPL:11.127|MUS:12.152|LIV:10.247|KID:11.133|PIT:11.284	TRUE	TRUE
PPARD	cluster_I	PPARD 21283829 ChIP-Seq MYOFIBROBLAST Human	8/2749	0.0307038	0.265283	2.515	8.759	AMBP;SMOX;APOA1;PIM3;EPPK1;ANGPTL4;SGK1;TNS1	top70	TRUE	PPARD	FAT:48.194|ADR:43.799|LUN:75.3|HTH:42.077|SPL:75.982|MUS:36.087|LIV:40.351|KID:NA|PIT:67.106	FAT:11.069|ADR:11.504|LUN:NA|HTH:10.436|SPL:10.734|MUS:11.385|LIV:10.245|KID:10.607|PIT:11.395	TRUE	TRUE
ESR1	cluster_I	ESR1 30970003 ChIP-Seq MCF-7 Human BreastCancer	4/868	0.0314943	0.265283	3.686	12.746	WBP1L;SNX10;PIM3;SGK1	top71	TRUE	ESR1	FAT:NA|ADR:NA|LUN:NA|HTH:NA|SPL:NA|MUS:NA|LIV:22.157|KID:NA|PIT:30.934	FAT:10.582|ADR:9.21|LUN:NA|HTH:8.576|SPL:8.057|MUS:10.453|LIV:9.665|KID:9.386|PIT:11.323	FALSE	TRUE
ESR1	cluster_I	ESR1 21235772 ChIP-Seq MCF-7 Human	2/200	0.0317181	0.265283	7.682	26.51	HSPB8;GLB1L2	top72	TRUE	ESR1	FAT:NA|ADR:NA|LUN:NA|HTH:NA|SPL:NA|MUS:NA|LIV:22.157|KID:NA|PIT:30.934	FAT:10.582|ADR:9.21|LUN:NA|HTH:8.576|SPL:8.057|MUS:10.453|LIV:9.665|KID:9.386|PIT:11.323	FALSE	TRUE
ISL1	cluster_I	ISL1 27105846 Chip-Seq CPCs Mouse	5/1293	0.031747	0.265283	3.154	10.88	TMCC3;CDKAL1;PPP2R3A;KLF15;TSKU	top73	FALSE	ISL1	FAT:NA|ADR:NA|LUN:NA|HTH:NA|SPL:NA|MUS:NA|LIV:NA|KID:NA|PIT:NA	FAT:8.778|ADR:10.423|LUN:NA|HTH:11.443|SPL:8.377|MUS:8.117|LIV:7.621|KID:7.663|PIT:11.136	FALSE	TRUE
BRD4	cluster_I	BRD4 25478319 ChIP-Seq HGPS Human	6/1770	0.0329719	0.268617	2.815	9.605	AHSG;SMOX;HSPB8;WBP1L;APOA1;CDKAL1	top74	FALSE	BRD4	FAT:98.721|ADR:90.342|LUN:121.249|HTH:47.05|SPL:129.54|MUS:109.833|LIV:66.166|KID:NA|PIT:100.541	FAT:11.671|ADR:12.102|LUN:NA|HTH:12.324|SPL:13.036|MUS:11.504|LIV:11.583|KID:11.637|PIT:12.177	TRUE	TRUE
FOXA1	cluster_I	FOXA1 27270436 ChIP-Seq VCaP Human Prostate Carcinoma	9/3331	0.0330267	0.268617	2.374	8.097	AMBP;SMOX;WBP1L;TMCC3;SNX10;CDKAL1;KLK2;PPP2R3A;KLF15	top75	FALSE	FOXA1	FAT:NA|ADR:NA|LUN:10.206|HTH:NA|SPL:NA|MUS:NA|LIV:26.34|KID:NA|PIT:NA	FAT:8.405|ADR:8.473|LUN:NA|HTH:8.791|SPL:8.254|MUS:8.767|LIV:10.482|KID:8.133|PIT:7.865	FALSE	TRUE
STAT1	cluster_I	STAT1 17558387 ChIP-Seq HELA Human	5/1349	0.0371795	0.298415	3.013	9.919	TMCC3;PIM3;NPM3;KLF15;TSKU	top76	FALSE	STAT1	FAT:84.043|ADR:95.991|LUN:125.711|HTH:76.771|SPL:149.642|MUS:41.223|LIV:53.084|KID:NA|PIT:79.141	FAT:11.866|ADR:11.862|LUN:NA|HTH:9.516|SPL:11.9|MUS:9.67|LIV:10.439|KID:9.961|PIT:9.913	TRUE	TRUE
ZFX	cluster_I	ZFX 18555785 ChIP-Seq MESCs Mouse	7/2372	0.0410663	0.320161	2.482	7.923	ALAS1;SMOX;APOC1;PIM3;EPPK1;KLF15;TSKU	top77	FALSE	ZFX	FAT:33.391|ADR:22.191|LUN:30.381|HTH:13.878|SPL:36.307|MUS:29.547|LIV:18.069|KID:NA|PIT:27.387	FAT:10.641|ADR:10.895|LUN:NA|HTH:10.194|SPL:11.107|MUS:10.581|LIV:10.335|KID:10.373|PIT:10.798	FALSE	TRUE
TAF7L	cluster_I	TAF7L 23326641 ChIP-Seq C3H10T1-2 Mouse	3/554	0.0414635	0.320161	4.23	13.463	PIM3;EPPK1;KLF15	top79	FALSE	TAF7L	FAT:NA|ADR:NA|LUN:NA|HTH:NA|SPL:NA|MUS:NA|LIV:NA|KID:NA|PIT:NA	FAT:7.675|ADR:7.504|LUN:NA|HTH:7.554|SPL:7.683|MUS:7.352|LIV:7.449|KID:7.66|PIT:7.37	FALSE	FALSE
NACC1	cluster_I	NACC1 18358816 ChIP-ChIP MESCs Mouse	3/554	0.0414635	0.320161	4.23	13.463	APOC1;APOA2;SNX10	top78	FALSE	NACC1	FAT:28.664|ADR:44.416|LUN:42.552|HTH:43.12|SPL:41.335|MUS:25.009|LIV:27.512|KID:NA|PIT:44.658	FAT:8.811|ADR:9.079|LUN:NA|HTH:9.249|SPL:9.701|MUS:8.982|LIV:8.667|KID:9.001|PIT:8.797	FALSE	TRUE
NR3C2	cluster_I	NR3C2 34362910 ChIP-Seq WistarRat Hippocampus Stress	4/974	0.045155	0.34122	3.265	10.114	SMOX;PLIN4;KLF15;TNS1	top80	TRUE	NR3C2	FAT:14.879|ADR:10.781|LUN:15.544|HTH:11.656|SPL:NA|MUS:11.752|LIV:NA|KID:NA|PIT:24.14	FAT:7.764|ADR:7.55|LUN:NA|HTH:7.678|SPL:7.568|MUS:7.587|LIV:7.639|KID:7.594|PIT:7.663	FALSE	FALSE
AHR	cluster_I	AHR 22903824 ChIP-Seq MCF-7 Human	3/577	0.0458714	0.34122	4.055	12.498	CDKAL1;TSKU;TNS1	top81	TRUE	AHR	FAT:96.549|ADR:47.308|LUN:105.145|HTH:NA|SPL:38.363|MUS:NA|LIV:36.267|KID:NA|PIT:16.404	FAT:7.483|ADR:7.655|LUN:NA|HTH:7.532|SPL:7.51|MUS:7.6|LIV:7.49|KID:7.844|PIT:7.516	TRUE	FALSE
RXRA	cluster_I	RXRA 24833708 ChIP-Seq LIVER Mouse	5/1434	0.0464888	0.34122	2.821	8.656	AHSG;PLIN4;TMCC3;CDKAL1;ANGPTL4	top82	TRUE	RXRA	FAT:132.69|ADR:129.546|LUN:90.793|HTH:59.489|SPL:141.53|MUS:235.963|LIV:227.376|KID:NA|PIT:128.713	FAT:9.134|ADR:8.297|LUN:NA|HTH:8.121|SPL:8.228|MUS:8.958|LIV:10.024|KID:9.071|PIT:7.911	TRUE	TRUE
HIF1A	cluster_I	HIF1A 21447827 ChIP-Seq MCF-7 Human	2/248	0.0468594	0.34122	6.168	18.879	ANGPTL4;TNS1	top83	FALSE	HIF1A	FAT:169.163|ADR:286.29|LUN:220.182|HTH:61.168|SPL:128.797|MUS:17.765|LIV:44.831|KID:NA|PIT:97.684	FAT:8.471|ADR:9.072|LUN:NA|HTH:9.197|SPL:8.755|MUS:8.364|LIV:8.575|KID:8.519|PIT:8.65	TRUE	TRUE
SPI1	cluster_I	SPI1 20517297 ChIP-Seq HL60 Human	4/990	0.0474697	0.34122	3.209	9.781	ALAS1;HSPB8;TMCC3;SNX10	top84	FALSE	SPI1	FAT:28.676|ADR:15.336|LUN:89.426|HTH:NA|SPL:150.697|MUS:NA|LIV:NA|KID:NA|PIT:NA	FAT:8.215|ADR:7.821|LUN:NA|HTH:7.698|SPL:9.182|MUS:7.894|LIV:8.12|KID:7.953|PIT:7.707	TRUE	TRUE
JUN	cluster_I	JUN 27471255 ChIP-Seq Chondrocytes Mouse Rib	10/4145	0.0484599	0.34122	2.128	6.441	ARG2;HSPB8;PLIN4;WBP1L;CDKAL1;ANGPTL4;NPM3;KLF15;TSKU;TNS1	top85	FALSE	JUN	FAT:741.753|ADR:134.486|LUN:475.269|HTH:104.639|SPL:93.818|MUS:132.973|LIV:235.473|KID:NA|PIT:193.036	FAT:9.691|ADR:11.441|LUN:NA|HTH:9.247|SPL:8.84|MUS:10.016|LIV:8.916|KID:9.349|PIT:8.521	TRUE	TRUE
AR	cluster_I	AR 27270436 ChIP-Seq VCaP Human Prostate Carcinoma	9/3565	0.0486102	0.34122	2.187	6.612	SMOX;WBP1L;TMCC3;KLK2;PPP2R3A;SGK1;KLF15;TSKU;GLB1L2	top86	TRUE	AR	FAT:22.63|ADR:NA|LUN:11.074|HTH:NA|SPL:NA|MUS:21.013|LIV:83.029|KID:NA|PIT:16.267	FAT:9.095|ADR:10.105|LUN:NA|HTH:9.013|SPL:8.187|MUS:9.799|LIV:8.087|KID:9.543|PIT:9.329	TRUE	TRUE
SOX2	cluster_I	SOX2 18358816 ChIP-ChIP MESCs Mouse	3/591	0.0486658	0.34122	3.956	11.958	APOC1;APOA2;SNX10	top87	FALSE	SOX2	FAT:NA|ADR:NA|LUN:NA|HTH:64.448|SPL:NA|MUS:NA|LIV:NA|KID:NA|PIT:25.59	FAT:8.007|ADR:7.668|LUN:NA|HTH:9.112|SPL:7.868|MUS:7.815|LIV:8.148|KID:7.91|PIT:8.309	TRUE	TRUE

## Sheet: J
Gene expression changes in cluster J occur in the following tissues: ADR, FAT, HTH, KID, LIV, MUS, PIT.
TF	cluster	Term	Overlap	P.value	Adjusted.P.value	Odds.Ratio	Combined.Score	Genes	TF_rank	nuclear_receptors	mapped_name	tissue_cpm_gtex	tissue_log2_microarray	pattern_tissue_colocalization_gtex	pattern_tissue_colocalization_microarray
TET1	cluster_J	TET1 21490601 ChIP-Seq MESCs Mouse	6/1618	0.00220192	0.649947	5.698	34.862	PNMT;PPFIBP1;PPP1R3C;CAB39L;TMPRSS2;SLC25A32	top1	FALSE	TET1	FAT:NA|ADR:NA|LUN:NA|HTH:NA|SPL:NA|MUS:NA|LIV:NA|KID:NA|PIT:NA	FAT:7.628|ADR:8.047|LUN:NA|HTH:8.449|SPL:8.637|MUS:8.109|LIV:7.603|KID:8.112|PIT:8.958	FALSE	TRUE
JUN	cluster_J	JUN 21703547 ChIP-Seq K562 Human	5/1206	0.00349842	0.649947	6.015	34.015	NT5E;PPFIBP1;REP15;SLC25A32;RGS9	top2	FALSE	JUN	FAT:741.753|ADR:134.486|LUN:475.269|HTH:104.639|SPL:93.818|MUS:132.973|LIV:235.473|KID:NA|PIT:193.036	FAT:9.691|ADR:11.441|LUN:NA|HTH:9.247|SPL:8.84|MUS:10.016|LIV:8.916|KID:9.349|PIT:8.521	TRUE	TRUE
CEBPD	cluster_J	CEBPD 21427703 ChIP-Seq 3T3-L1 Mouse	5/1349	0.00565981	0.649947	5.334	27.598	NT5E;PPFIBP1;PPP1R3C;REP15;MDM1	top3	FALSE	CEBPD	FAT:327.483|ADR:88.103|LUN:221.259|HTH:36.354|SPL:155.305|MUS:95.252|LIV:140.356|KID:NA|PIT:180.382	FAT:7.564|ADR:7.582|LUN:NA|HTH:7.464|SPL:7.631|MUS:7.724|LIV:7.564|KID:7.568|PIT:7.723	TRUE	FALSE
TBX5	cluster_J	TBX5 21415370 ChIP-Seq HL-1 Mouse	5/1561	0.0104334	0.649947	4.555	20.781	PNMT;PPFIBP1;CAB39L;SLC25A32;MDM1	top4	FALSE	TBX5	FAT:NA|ADR:NA|LUN:47.93|HTH:NA|SPL:NA|MUS:NA|LIV:NA|KID:NA|PIT:NA	FAT:7.804|ADR:7.789|LUN:NA|HTH:7.645|SPL:7.664|MUS:7.683|LIV:7.857|KID:7.698|PIT:7.715	FALSE	FALSE
TP63	cluster_J	TP63 23658742 ChIP-Seq EP156T Human	7/2937	0.0105027	0.649947	3.704	16.874	NT5E;PPFIBP1;TAB3;SLC25A32;ANKRD2;RGS9;MDM1	top5	FALSE	TRP63	FAT:NA|ADR:NA|LUN:NA|HTH:NA|SPL:NA|MUS:NA|LIV:NA|KID:NA|PIT:NA	FAT:8.814|ADR:8.268|LUN:NA|HTH:8.191|SPL:8.949|MUS:8.709|LIV:7.621|KID:7.967|PIT:8.117	FALSE	TRUE
AR	cluster_J	AR 27270436 ChIP-Seq LNCaP Human Prostate Carcinoma	2/182	0.01145	0.649947	13.751	61.466	REP15;CAB39L	top6	TRUE	AR	FAT:22.63|ADR:NA|LUN:11.074|HTH:NA|SPL:NA|MUS:21.013|LIV:83.029|KID:NA|PIT:16.267	FAT:9.095|ADR:10.105|LUN:NA|HTH:9.013|SPL:8.187|MUS:9.799|LIV:8.087|KID:9.543|PIT:9.329	TRUE	TRUE
CDX2	cluster_J	CDX2 22108803 ChIP-Seq LS180 Human	5/1619	0.012121	0.649947	4.377	19.315	NT5E;PPFIBP1;ABCC8;TFCP2L1;MDM1	top7	FALSE	CDX2	FAT:NA|ADR:NA|LUN:NA|HTH:NA|SPL:NA|MUS:NA|LIV:NA|KID:NA|PIT:NA	FAT:7.765|ADR:7.714|LUN:NA|HTH:7.671|SPL:7.629|MUS:7.528|LIV:8.052|KID:7.687|PIT:7.706	FALSE	TRUE
NR3C1	cluster_J	NR3C1 27076634 ChIP-Seq BEAS2B Human Lung Inflammation	7/3084	0.0136654	0.649947	3.496	15.009	NT5E;PPFIBP1;PPP1R3C;ABCC8;CCNG1;TFCP2L1;ANKRD2	top8	TRUE	NR3C1	FAT:90.796|ADR:22.305|LUN:74.366|HTH:32.889|SPL:46.401|MUS:75.227|LIV:37.687|KID:NA|PIT:64.784	FAT:7.997|ADR:7.926|LUN:NA|HTH:7.918|SPL:7.842|MUS:7.992|LIV:8.027|KID:7.9|PIT:7.872	TRUE	TRUE
HOXB4	cluster_J	HOXB4 20404135 ChIP-ChIP EML Mouse	4/1180	0.018973	0.649947	4.569	18.115	CAB39L;CCNG1;RGS9;MDM1	top9	FALSE	HOXB4	FAT:14.544|ADR:NA|LUN:12.103|HTH:NA|SPL:10.19|MUS:NA|LIV:NA|KID:NA|PIT:NA	FAT:8.829|ADR:10.639|LUN:NA|HTH:7.612|SPL:8.372|MUS:8.336|LIV:8.261|KID:9.828|PIT:7.589	FALSE	TRUE
CDX2	cluster_J	CDX2 19796622 ChIP-Seq MESCs Mouse	2/252	0.0211844	0.649947	9.866	38.028	INSL6;TMPRSS2	top10	FALSE	CDX2	FAT:NA|ADR:NA|LUN:NA|HTH:NA|SPL:NA|MUS:NA|LIV:NA|KID:NA|PIT:NA	FAT:7.765|ADR:7.714|LUN:NA|HTH:7.671|SPL:7.629|MUS:7.528|LIV:8.052|KID:7.687|PIT:7.706	FALSE	TRUE
TP53	cluster_J	TP53 18474530 ChIP-ChIP U2OS Human	3/687	0.0224102	0.649947	5.643	21.432	PPFIBP1;PPP1R3C;ANKRD2	top11	FALSE	TRP53	FAT:NA|ADR:NA|LUN:NA|HTH:NA|SPL:NA|MUS:NA|LIV:NA|KID:NA|PIT:NA	FAT:9.395|ADR:10.582|LUN:NA|HTH:9.668|SPL:11.31|MUS:9.539|LIV:9.822|KID:9.745|PIT:10.217	FALSE	TRUE
TCFAP2C	cluster_J	TCFAP2C 20176728 ChIP-ChIP TROPHOBLAST STEM CELLS Mouse	5/1980	0.0270571	0.649947	3.507	12.659	NT5E;PPP1R3C;CAB39L;SLC25A32;MDM1	top12	FALSE	TFAP2C	FAT:NA|ADR:NA|LUN:NA|HTH:NA|SPL:NA|MUS:NA|LIV:NA|KID:NA|PIT:NA	FAT:8.027|ADR:7.675|LUN:NA|HTH:7.614|SPL:7.766|MUS:7.751|LIV:7.96|KID:7.931|PIT:7.792	FALSE	TRUE
RUNX2	cluster_J	RUNX2 22187159 ChIP-Seq PCA Human	6/2722	0.0272689	0.649947	3.179	11.449	NT5E;ABCC8;REP15;TMPRSS2;TAB3;TFCP2L1	top13	FALSE	RUNX2	FAT:NA|ADR:NA|LUN:10.52|HTH:NA|SPL:11.345|MUS:NA|LIV:NA|KID:NA|PIT:NA	FAT:7.726|ADR:7.531|LUN:NA|HTH:7.676|SPL:7.522|MUS:7.608|LIV:7.615|KID:7.56|PIT:7.583	FALSE	FALSE
DNAJC2	cluster_J	DNAJC2 21179169 ChIP-ChIP NT2 Human	3/758	0.0289349	0.649947	5.093	18.044	ABCC8;CCL17;KNG1	top14	FALSE	DNAJC2	FAT:29.29|ADR:26.862|LUN:25.293|HTH:19.089|SPL:32.62|MUS:26.882|LIV:17.51|KID:NA|PIT:31.421	FAT:9.622|ADR:10.361|LUN:NA|HTH:10.814|SPL:11.841|MUS:10.989|LIV:10.716|KID:10.967|PIT:10.204	FALSE	TRUE
TAL1	cluster_J	TAL1 30185409 ChIP-Seq HPC Mouse BoneMarrow Leukemia	5/2154	0.0373507	0.649947	3.192	10.492	INSL6;NT5E;REP15;CCL17;MDM1	top15	FALSE	TAL1	FAT:24.56|ADR:NA|LUN:46.158|HTH:NA|SPL:25.843|MUS:NA|LIV:NA|KID:NA|PIT:NA	FAT:8.414|ADR:8.177|LUN:NA|HTH:8.381|SPL:11.974|MUS:8.123|LIV:7.933|KID:7.989|PIT:7.679	FALSE	TRUE
GATA1	cluster_J	GATA1 19941827 ChIP-Seq MEL Mouse	4/1453	0.0373556	0.649947	3.654	12.013	INSL6;ABCC8;ANKRD2;CCL17	top16	FALSE	GATA1	FAT:NA|ADR:NA|LUN:NA|HTH:NA|SPL:NA|MUS:NA|LIV:NA|KID:NA|PIT:NA	FAT:8.188|ADR:8.019|LUN:NA|HTH:7.797|SPL:9.354|MUS:7.96|LIV:7.701|KID:7.752|PIT:7.831	FALSE	TRUE
PU.1	cluster_J	PU.1 20176806 ChIP-Seq MACROPHAGES Mouse	4/1469	0.0386745	0.649947	3.611	11.746	PPP1R3C;RGS9;KNG1;MDM1	top17	FALSE	SPI1	FAT:28.676|ADR:15.336|LUN:89.426|HTH:NA|SPL:150.697|MUS:NA|LIV:NA|KID:NA|PIT:NA	FAT:8.215|ADR:7.821|LUN:NA|HTH:7.698|SPL:9.182|MUS:7.894|LIV:8.12|KID:7.953|PIT:7.707	TRUE	TRUE
PADI4	cluster_J	PADI4 21655091 ChIP-ChIP MCF-7 Human	3/857	0.0395719	0.649947	4.48	14.468	PPFIBP1;CAB39L;SLC25A32	top18	FALSE		ADR:NA|FAT:NA|HTH:NA|KID:NA|LIV:NA|MUS:NA|PIT:NA	ADR:NA|FAT:NA|HTH:NA|KID:NA|LIV:NA|MUS:NA|PIT:NA	FALSE	FALSE
ESR1	cluster_J	ESR1 17901129 ChIP-ChIP LIVER Mouse	2/354	0.0396563	0.649947	6.971	22.499	NT5E;KNG1	top19	TRUE	ESR1	FAT:NA|ADR:NA|LUN:NA|HTH:NA|SPL:NA|MUS:NA|LIV:22.157|KID:NA|PIT:30.934	FAT:10.582|ADR:9.21|LUN:NA|HTH:8.576|SPL:8.057|MUS:10.453|LIV:9.665|KID:9.386|PIT:11.323	FALSE	TRUE
CEBPA	cluster_J	CEBPA 20513432 ChIP-Seq MACROPHAGES Mouse	4/1493	0.0407044	0.649947	3.548	11.36	RGS9;CCL17;KNG1;MDM1	top20	FALSE	CEBPA	KID:NA|LIV:187.429|PIT:NA|FAT:147.83|ADR:NA|LUN:30.264|HTH:11.347|SPL:15.95|MUS:20.055	KID:8.277|LIV:10.552|PIT:7.848|FAT:11.214|ADR:9.069|LUN:NA|HTH:7.856|SPL:7.992|MUS:8.654	TRUE	TRUE
KLF1	cluster_J	KLF1 20508144 ChIP-Seq FETAL-LIVER-ERYTHROID Mouse	3/868	0.0408638	0.649947	4.42	14.133	PPP1R3C;CCNG1;CCL17	top21	FALSE		ADR:NA|FAT:NA|HTH:NA|KID:NA|LIV:NA|MUS:NA|PIT:NA	ADR:NA|FAT:NA|HTH:NA|KID:NA|LIV:NA|MUS:NA|PIT:NA	FALSE	FALSE
NFKB1	cluster_J	NFKB1 27076634 ChIP-Seq BEAS2B Human Lung Inflammation	7/3823	0.0411247	0.649947	2.696	8.603	NT5E;PPP1R3C;CAB39L;CCNG1;TFCP2L1;RGS9;MDM1	top22	FALSE	NFKB1	FAT:67.417|ADR:39.367|LUN:67.748|HTH:11.635|SPL:63.929|MUS:27.051|LIV:23.261|KID:NA|PIT:24.31	FAT:10.58|ADR:10.972|LUN:NA|HTH:9.99|SPL:12.019|MUS:10.415|LIV:10.281|KID:9.983|PIT:10.296	TRUE	TRUE
TCF3/E2A	cluster_J	TCF3/E2A 22897851 ChIP-Seq JUKARTE6-1 Human	4/1501	0.0413948	0.649947	3.528	11.235	INSL6;NT5E;TFCP2L1;MDM1	top23	FALSE	TCF3	FAT:37.392|ADR:27.074|LUN:47.17|HTH:17.894|SPL:109.8|MUS:17.581|LIV:15.964|KID:NA|PIT:49.291	FAT:8.04|ADR:8.07|LUN:NA|HTH:7.96|SPL:8.32|MUS:7.733|LIV:7.841|KID:7.764|PIT:7.864	TRUE	TRUE
GATA3	cluster_J	GATA3 21878914 ChIP-Seq MCF-7 Human	4/1574	0.0480144	0.649947	3.351	10.174	INSL6;PPFIBP1;TMPRSS2;ANKRD2	top24	FALSE	GATA3	FAT:NA|ADR:NA|LUN:NA|HTH:NA|SPL:12.747|MUS:NA|LIV:NA|KID:NA|PIT:11.306	FAT:8.584|ADR:9.672|LUN:NA|HTH:7.831|SPL:8.586|MUS:7.963|LIV:7.818|KID:9.487|PIT:7.671	FALSE	TRUE
CTCF	cluster_J	CTCF 20526341 ChIP-Seq ESCs Human	4/1591	0.0496389	0.649947	3.312	9.945	PPFIBP1;PPP1R3C;REP15;CCNG1	top25	FALSE	CTCF	FAT:38.255|ADR:31.72|LUN:38.483|HTH:25.258|SPL:52.024|MUS:34.038|LIV:19.431|KID:NA|PIT:33.605	FAT:10.174|ADR:10.54|LUN:NA|HTH:10.095|SPL:11.249|MUS:10.172|LIV:10.004|KID:10.241|PIT:10.401	TRUE	TRUE
OCT1	cluster_J	OCT1 27270436 Chip-Seq PROSTATE Human	4/1591	0.0496389	0.649947	3.312	9.945	PPFIBP1;CCNG1;TMPRSS2;TFCP2L1	top26	FALSE	POU2F1	ADR:21.722|FAT:24.634|HTH:22.367|KID:NA|LIV:11.685|MUS:16.879|PIT:36.321	ADR:9.895|FAT:8.941|HTH:10.122|KID:9.711|LIV:9.322|MUS:9.331|PIT:10.207	FALSE	TRUE
KLF5	cluster_J	KLF5 20875108 ChIP-Seq MESCs Mouse	4/1593	0.0498321	0.649947	3.307	9.919	NT5E;PPP1R3C;CAB39L;RGS9	top27	FALSE	KLF5	FAT:12.957|ADR:NA|LUN:36.252|HTH:NA|SPL:NA|MUS:19.664|LIV:NA|KID:NA|PIT:24.614	FAT:8.928|ADR:9.703|LUN:NA|HTH:9.288|SPL:9.191|MUS:9.834|LIV:8.179|KID:8.549|PIT:9.645	FALSE	TRUE
CBP	cluster_J	CBP 21632823 ChIP-Seq H3396 Human	4/1593	0.0498321	0.649947	3.307	9.919	PPP1R3C;ABCC8;ANKRD2;MDM1	top28	FALSE	CREBBP	FAT:93.795|ADR:61.32|LUN:100.107|HTH:42.244|SPL:120.701|MUS:89.134|LIV:44.973|KID:NA|PIT:89.282	FAT:7.873|ADR:7.848|LUN:NA|HTH:7.966|SPL:7.965|MUS:8.048|LIV:7.981|KID:7.907|PIT:7.746	TRUE	TRUE
CSB	cluster_J	CSB 26484114 Chip-Seq FIBROBLAST Human	4/1594	0.0499289	0.649947	3.305	9.905	PPFIBP1;SLC25A32;TFCP2L1;ANKRD2	top29	FALSE	ERCC6	FAT:15.062|ADR:11.099|LUN:13.014|HTH:NA|SPL:16.676|MUS:NA|LIV:NA|KID:NA|PIT:26.318	FAT:7.752|ADR:7.98|LUN:NA|HTH:7.82|SPL:7.793|MUS:7.884|LIV:7.747|KID:7.74|PIT:7.742	FALSE	FALSE

[truncated: 8 more sheets: K, L, M, N, O, P, DOWN, UP]
