# Supplementary material for: A cross-tissue transcriptomic approach decodes glucocorticoid receptor-dependent links to human metabolic phenotypes
Source: Research Square preprint supplement (doi:10.21203/rs.3.rs-6147414/v1), 2025-04-18
Supplement: Supplementary file 6 [file c78289023372f19ce498ec79.xlsx]

## Sheet: A
Term	Overlap	P-value	Adjusted P-value	Old P-value	Old Adjusted P-value	Odds Ratio	Combined Score	Genes
Intrinsic Apoptotic Signaling Pathway In Response To Endoplasmic Reticulum Stress (GO:0070059)	2/30	7,78E-05	0,01618042191	0	0	203,7040816	1927,344411	CHAC1;RNF186
Regulation Of Cell Motility (GO:2000145)	2/123	0,001312954056	0,04061543852	0	0	46,91853601	311,3268044	SPATA13;OSGIN1
Nervous System Development (GO:0007399)	2/433	0,01522206385	0,04061543852	0	0	12,96652304	54,26501994	MEF2C;CHAC1
Regulation Of Apoptotic Process (GO:0042981)	2/705	0,03789507696	0,05838648895	0	0	7,839057102	25,65671707	MEF2C;OSGIN1

## Sheet: B
Term	Overlap	P-value	Adjusted P-value	Old P-value	Old Adjusted P-value	Odds Ratio	Combined Score	Genes
Regulation Of Neurogenesis (GO:0050767)	2/67	2,30E-04	0,0255994778	0	0	122,6338462	1027,540438	WNT3A;SOX11
Positive Regulation Of Macromolecule Metabolic Process (GO:0010604)	2/364	0,006529774561	0,0255994778	0	0	21,69171271	109,1393115	WNT3A;SOX11
Positive Regulation Of Gene Expression (GO:0010628)	2/480	0,01114326485	0,02941281549	0	0	16,33054393	73,43714984	WNT3A;SOX11
Positive Regulation Of Cell Population Proliferation (GO:0008284)	2/483	0,01127745257	0,02941281549	0	0	16,22619543	72,77367346	WNT3A;SOX11

## Sheet: C
Term	Overlap	P-value	Adjusted P-value	Old P-value	Old Adjusted P-value	Odds Ratio	Combined Score	Genes
Regulation Of Cold-Induced Thermogenesis (GO:0120161)	3/146	3,39E-04	0,03773315327	0	0	26,01136364	207,8245934	ADRB3;ID1;FFAR4
Regulation Of Transmembrane Transport (GO:0034762)	2/32	4,17E-04	0,03773315327	0	0	78,23921569	608,9018618	KCNJ8;FFAR4
Blood Vessel Morphogenesis (GO:0048514)	2/53	0,001144674291	0,06114503318	0	0	45,97462514	311,369362	EGFL7;ID1
Fat Cell Differentiation (GO:0045444)	2/62	0,001562836143	0,06114503318	0	0	39,06078431	252,3816125	FFAR4;FFAR2
Positive Regulation Of Cold-Induced Thermogenesis (GO:0120162)	2/98	0,003849038979	0,06114503318	0	0	24,36887255	135,4892689	ADRB3;FFAR4
Regulation Of Cell Adhesion (GO:0030155)	2/144	0,008124111152	0,06114503318	0	0	16,43661972	79,10811857	NUAK1;PLAU
Negative Regulation Of Multicellular Organismal Process (GO:0051241)	2/231	0,01995899819	0,06337857319	0	0	10,14744413	39,71785942	ID1;FFAR4
Regulation Of Inflammatory Response (GO:0050727)	2/240	0,0214393068	0,06577143271	0	0	9,759268413	37,50027459	FFAR4;FFAR2
Monoatomic Cation Transmembrane Transport (GO:0098655)	2/281	0,02873858555	0,07029302681	0	0	8,307822054	29,4887358	KCNJ8;SLC40A1
Positive Regulation Of MAPK Cascade (GO:0043410)	2/310	0,03442367024	0,07634215871	0	0	7,514514897	25,31648232	ADRB3;FFAR4

## Sheet: D
Term	Overlap	P-value	Adjusted P-value	Old P-value	Old Adjusted P-value	Odds Ratio	Combined Score	Genes
Regulation Of Type II Interferon Production (GO:0032649)	5/87	8,09E-07	4,86E-04	0	0	34,63066202	485,7712388	CD274;CLEC7A;IL1B;PDE4B;RASGRP1
Positive Regulation Of Cytokine Production (GO:0001819)	7/320	2,98E-06	6,46E-04	0	0	13,31484171	169,4193792	CD274;IL33;CLEC7A;IRF1;IL1B;PDE4B;RASGRP1
Cellular Response To Molecule Of Bacterial Origin (GO:0071219)	5/117	3,51E-06	6,46E-04	0	0	25,31632653	317,9542668	CD274;CXCL10;IL1B;PDE4B;CCR5
Positive Regulation Of Type II Interferon Production (GO:0032729)	4/58	5,38E-06	6,46E-04	0	0	40,95884774	496,9309153	CLEC7A;IL1B;PDE4B;RASGRP1
Regulation Of Cell Population Proliferation (GO:0042127)	9/766	1,59E-05	0,001239899224	0	0	7,36468232	81,3729841	CXCL10;FGF7;ESM1;CLEC7A;IRF1;IL1B;S1PR2;SOX7;IFIT3
Positive Regulation Of Interleukin-2 Production (GO:0032743)	3/25	1,65E-05	0,001239899224	0	0	73,48157248	809,0477857	CLEC7A;IL1B;PDE4B
Cellular Response To Lipid (GO:0071396)	5/228	8,76E-05	0,004737129104	0	0	12,64381807	118,1305743	CD274;CXCL10;IL1B;PDE4B;CCR5
Positive Regulation Of Protein Phosphorylation (GO:0001934)	6/377	9,63E-05	0,004737129104	0	0	9,317742191	86,17527619	EFNA1;FGF7;IL1B;APLNR;S1PR2;RASGRP1
Inflammatory Response (GO:0006954)	5/236	1,03E-04	0,004737129104	0	0	12,20098949	112,0134789	CXCL10;IL1B;CCL4;CCR5;APOL2
Positive Regulation Of Monocyte Chemotactic Protein-1 Production (GO:0071639)	2/8	1,08E-04	0,004737129104	0	0	175,0350877	1598,056836	CLEC7A;IL1B
Regulation Of Gap Junction Assembly (GO:1903596)	2/8	1,08E-04	0,004737129104	0	0	175,0350877	1598,056836	IL1B;APLNR
Regulation Of ERK1 And ERK2 Cascade (GO:0070372)	5/244	1,20E-04	0,004737129104	0	0	11,78780634	106,3763824	DUSP4;SEMA6A;IL1B;CCL4;RASGRP1
Positive Regulation Of DNA-templated Transcription (GO:0045893)	10/1243	1,26E-04	0,004737129104	0	0	5,062719654	45,44633799	IL33;CXCL10;FGF7;DBP;LBH;SOX18;IRF1;IL1B;LMO2;MEOX2
Actin Cytoskeleton Reorganization (GO:0031532)	3/53	1,62E-04	0,005399192412	0	0	32,28648649	281,7985135	FGF7;S1PR2;ASB2
Positive Regulation Of Chemokine Production (GO:0032722)	3/53	1,62E-04	0,005399192412	0	0	32,28648649	281,7985135	IL33;CLEC7A;IL1B
Regulation Of Phagocytosis (GO:0050764)	3/58	2,12E-04	0,006362138323	0	0	29,34398034	248,2354271	CLEC7A;IL1B;SIRPB1
Positive Regulation Of Calcium-Mediated Signaling (GO:0050850)	2/12	2,54E-04	0,006630361704	0	0	105	869,1407928	CLEC7A;CCL4
Positive Regulation Of Neuroinflammatory Response (GO:0150078)	2/12	2,54E-04	0,006630361704	0	0	105	869,1407928	IL33;IL1B
Positive Regulation Of Cysteine-Type Endopeptidase Activity (GO:2001056)	3/64	2,84E-04	0,007093171296	0	0	26,44971201	216,027985	CLEC7A;TNFSF10;SOX7
Positive Regulation Of Granulocyte Macrophage Colony-Stimulating Factor Production (GO:0032725)	2/13	3,00E-04	0,007199899368	0	0	95,44976077	774,263839	IL1B;RASGRP1
Positive Regulation Of Adaptive Immune Response Based On Somatic Recombination Of Immune Receptors Built From Immunoglobulin Superfamily Domains (GO:0002824)	2/14	3,50E-04	0,007767838455	0	0	87,49122807	696,3300972	CLEC7A;IL1B
Endoderm Development (GO:0007492)	2/14	3,50E-04	0,007767838455	0	0	87,49122807	696,3300972	DUSP4;SOX7
Neutrophil Chemotaxis (GO:0030593)	3/70	3,70E-04	0,007921952152	0	0	24,07382009	190,2516149	CXCL10;CCL4;PDE4B
Regulation Of Granulocyte Macrophage Colony-Stimulating Factor Production (GO:0032645)	2/15	4,03E-04	0,008334213176	0	0	80,75708502	631,2797481	IL1B;RASGRP1
Regulation Of Establishment Of Endothelial Barrier (GO:1903140)	2/16	4,60E-04	0,008560964034	0	0	74,98496241	576,2409325	IL1B;S1PR2
Vasculature Development (GO:0001944)	2/16	4,60E-04	0,008560964034	0	0	74,98496241	576,2409325	SOX18;APLNR
Positive Regulation Of Interleukin-6 Production (GO:0032755)	3/76	4,71E-04	0,008560964034	0	0	22,08848575	169,2191067	IL33;CLEC7A;IL1B
Positive Regulation Of Tumor Necrosis Factor Production (GO:0032760)	3/78	5,08E-04	0,00871083474	0	0	21,4972973	163,0520395	IL33;CLEC7A;RASGRP1
Dendritic Cell Migration (GO:0036336)	2/18	5,85E-04	0,009288215089	0	0	65,60526316	488,3876279	ASB2;CCR5
Regulation Of MAPK Cascade (GO:0043408)	4/204	7,20E-04	0,01023880926	0	0	10,97777778	79,43047406	DUSP4;LBH;IL1B;RASGRP1
Positive Regulation Of Leukocyte Activation (GO:0002696)	2/20	7,24E-04	0,01023880926	0	0	58,30994152	421,597121	IL33;CLEC7A
Regulation Of Angiogenesis (GO:0045765)	4/205	7,34E-04	0,01023880926	0	0	10,92260918	78,83174163	CXCL10;SEMA6A;IL1B;APLNR
MAPK Cascade (GO:0000165)	3/98	9,88E-04	0,01347537762	0	0	16,9544808	117,3187536	IL1B;CCR5;RASGRP3
Apoptotic Process (GO:0006915)	4/228	0,001089573455	0,01452764606	0	0	9,78968254	66,78491066	SEMA6A;DAPK2;IRF1;IL1B
Regulation Of I-kappaB kinase/NF-kappaB Signaling (GO:0043122)	4/232	0,00116192131	0,0151003147	0	0	9,615984405	64,98174878	CLEC7A;IL1B;TNFSF10;APOL2
Negative Regulation Of MAPK Cascade (GO:0043409)	3/105	0,001206242913	0,0151003147	0	0	15,78537361	106,0815746	DUSP4;SEMA6A;IL1B
Cellular Response To Xenobiotic Stimulus (GO:0071466)	2/26	0,001229607046	0,0151003147	0	0	43,71929825	292,9656685	IL1B;PDE4B
Cellular Response To Oxygen-Containing Compound (GO:1901701)	5/406	0,001233192367	0,0151003147	0	0	6,9679373	46,67228261	CD274;CXCL10;IL1B;PDE4B;CCR5
Positive Regulation Of T Cell Activation (GO:0050870)	3/107	0,001273663216	0,01528395859	0	0	15,48024948	103,1891465	CD274;IL1B;SIRPB1
Positive Regulation Of Nitric Oxide Biosynthetic Process (GO:0045429)	2/27	0,001326298876	0,0155009562	0	0	41,96842105	278,0560247	CLEC7A;IL1B
Regulation Of Interleukin-6 Production (GO:0032675)	3/114	0,001528201688	0,01698001875	0	0	14,49890431	94,00601815	IL33;CLEC7A;IL1B
Cytokine-Mediated Signaling Pathway (GO:0019221)	4/257	0,001692367572	0,0181325097	0	0	8,654808959	55,2317608	IL33;CXCL10;IL1B;CCL4
Positive Regulation Of Release Of Sequestered Calcium Ion Into Cytosol (GO:0051281)	2/33	0,00198005504	0,020483328	0	0	33,83531409	210,6123327	CXCL10;APLNR
Negative Regulation Of Nucleic Acid-Templated Transcription (GO:1903507)	5/456	0,002054702935	0,02081013552	0	0	6,179600887	38,23704675	LBH;SOX18;IRF1;BHLHE40;SOX7
Endoderm Formation (GO:0001706)	2/35	0,002225685571	0,02189198922	0	0	31,7814992	194,1115541	DUSP4;SOX7
Positive Regulation Of Transcription By RNA Polymerase II (GO:0045944)	7/938	0,002343839439	0,02268231716	0	0	4,335611757	26,25631265	IL33;CXCL10;DBP;SOX18;IRF1;LMO2;MEOX2
Regulation Of p38MAPK Cascade (GO:1900744)	2/37	0,002484991042	0,02366658135	0	0	29,96240602	179,6991173	IL1B;RASGRP1
Positive Regulation Of Cell Population Proliferation (GO:0008284)	5/483	0,00263697812	0,02434133649	0	0	5,822474597	34,57456257	FGF7;ESM1;CLEC7A;IL1B;S1PR2
Regulation Of Intracellular Signal Transduction (GO:1902531)	4/297	0,00285943973	0,02560692295	0	0	7,458096322	43,68303652	LBH;CLEC7A;DAPK2;IL1B
Lymphocyte Chemotaxis (GO:0048247)	2/44	0,003498701379	0,02956649052	0	0	24,95989975	141,1573039	CXCL10;CCL4
Positive Regulation Of Intracellular Signal Transduction (GO:1902533)	5/525	0,003769769034	0,03035440572	0	0	5,340659341	29,80483945	CLEC7A;IL1B;CCL4;TNFSF10;APOL2
Regulation Of Interleukin-10 Production (GO:0032653)	2/46	0,003818220426	0,03035440572	0	0	23,82296651	132,6455824	CD274;CLEC7A
Antiviral Innate Immune Response (GO:0140374)	2/46	0,003818220426	0,03035440572	0	0	23,82296651	132,6455824	CXCL10;IFIT3
Regulation Of Nervous System Development (GO:0051960)	2/46	0,003818220426	0,03035440572	0	0	23,82296651	132,6455824	IL1B;BHLHE40
Negative Regulation Of DNA-templated Transcription (GO:0045892)	7/1025	0,003844891391	0,03035440572	0	0	3,946954813	21,94905488	EFNA1;IL33;LBH;SOX18;IRF1;BHLHE40;SOX7
Positive Regulation Of Lymphocyte Activation (GO:0051251)	2/47	0,00398289532	0,03103554795	0	0	23,29239766	128,7078792	CLEC7A;SIRPB1
Negative Regulation Of ERK1 And ERK2 Cascade (GO:0070373)	2/48	0,004150829694	0,03152528882	0	0	22,78489703	124,962561	DUSP4;SEMA6A
Cellular Response To Mechanical Stimulus (GO:0071260)	2/48	0,004150829694	0,03152528882	0	0	22,78489703	124,962561	IRF1;IL1B
Regulation Of Release Of Sequestered Calcium Ion Into Cytosol (GO:0051279)	2/51	0,004674059598	0,03505544699	0	0	21,38668099	114,7550979	CXCL10;APLNR
Positive Regulation Of Nucleic Acid-Templated Transcription (GO:1903508)	5/557	0,004842063454	0,03509567694	0	0	5,022774327	26,77346818	FGF7;LBH;SOX18;IRF1;IL1B
Sprouting Angiogenesis (GO:0002040)	2/52	0,004854901976	0,03509567694	0	0	20,95789474	111,6587667	ESM1;NRARP
Positive Regulation Of I-kappaB kinase/NF-kappaB Signaling (GO:0043123)	3/175	0,005129991656	0,03621170581	0	0	9,328095537	49,18379456	CLEC7A;TNFSF10;APOL2
Positive Regulation Of Hydrolase Activity (GO:0051345)	3/176	0,005211779399	0,03636125162	0	0	9,273707233	48,75033899	CCL4;RASGRP1;RASGRP3
Positive Regulation Of Macromolecule Metabolic Process (GO:0010604)	4/364	0,005883923753	0,04011766195	0	0	6,049382716	31,0667951	IL33;FGF7;CLEC7A;IL1B
Defense Response To Virus (GO:0051607)	3/189	0,006347270956	0,04185013817	0	0	8,619877942	43,61425786	CXCL10;IRF1;IFIT3
Regulation Of Gene Expression (GO:0010468)	7/1127	0,006440692626	0,04200451712	0	0	3,568181818	18,00190258	IL33;FGF7;CLEC7A;IL1B;BHLHE40;APLNR;SOX7
Positive Regulation Of Interleukin-8 Production (GO:0032757)	2/61	0,006624711257	0,04274007262	0	0	17,7528992	89,06538085	CLEC7A;IL1B
Negative Regulation Of Cell Population Proliferation (GO:0008285)	4/379	0,006773240479	0,04323344986	0	0	5,802962963	28,98449813	IRF1;IL1B;SOX7;IFIT3
Positive Regulation Of T Cell Proliferation (GO:0042102)	2/65	0,00749193151	0,04731746217	0	0	16,62238931	81,34878703	CD274;IL1B
Cellular Response To Type II Interferon (GO:0071346)	2/66	0,007716343966	0,04822714979	0	0	16,36184211	79,59078373	IRF1;CCL4
Regulation Of Neurogenesis (GO:0050767)	2/67	0,007943774569	0,04913674991	0	0	16,10931174	77,89443004	IL1B;BHLHE40
Positive Regulation Of Protein Modification Process (GO:0031401)	3/225	0,01021888714	0,05416372257	0	0	7,208911614	33,04217319	EFNA1;IL1B;RASGRP1
Positive Regulation Of Endothelial Cell Proliferation (GO:0001938)	2/77	0,01038138016	0,05416372257	0	0	13,95438596	63,74002714	APLNR;NRARP
Negative Regulation Of Blood Vessel Morphogenesis (GO:2000181)	2/77	0,01038138016	0,05416372257	0	0	13,95438596	63,74002714	CXCL10;SEMA6A
Positive Regulation Of JNK Cascade (GO:0046330)	2/77	0,01038138016	0,05416372257	0	0	13,95438596	63,74002714	IL1B;RASGRP1
Positive Regulation Of Phosphorylation (GO:0042327)	3/231	0,01097164996	0,05525608877	0	0	7,017069701	31,66411028	EFNA1;IL1B;RASGRP1
Cellular Response To Interleukin-1 (GO:0071347)	2/81	0,01143785902	0,05525608877	0	0	13,24516989	59,21685598	IL1B;CCL4
Regulation Of Epithelial To Mesenchymal Transition (GO:0010717)	2/83	0,0119831658	0,05525608877	0	0	12,91682911	57,14731302	EFNA1;IL1B
Regulation Of DNA-templated Transcription (GO:0006355)	9/22	0,01206424605	0,05525608877	0	0	2,738866499	12,09896761	FGF7;DBP;LBH;SOX18;IRF1;IL1B;BHLHE40;MEOX2;SOX7
Positive Regulation Of Programmed Cell Death (GO:0043068)	3/245	0,01285080989	0,05667459973	0	0	6,606432879	28,76671072	CLEC7A;DAPK2;TNFSF10
Regulation Of Peptidyl-Tyrosine Phosphorylation (GO:0050730)	2/90	0,0139797346	0,05667459973	0	0	11,88516746	50,75140657	EFNA1;FGF7
Positive Regulation Of MAP Kinase Activity (GO:0043406)	2/91	0,01427597714	0,05748715628	0	0	11,75103489	49,93222806	IL1B;RASGRP1
Positive Regulation Of Gene Expression (GO:0010628)	4/480	0,01513925821	0,05885583232	0	0	4,548085901	19,05859036	IL33;FGF7;CLEC7A;IL1B
Negative Regulation Of Signal Transduction (GO:0009968)	3/267	0,01615603854	0,05947008051	0	0	6,049140049	24,95549375	SEMA6A;IL1B;NRARP
Regulation Of Transcription By RNA Polymerase II (GO:0006357)	9/28	0,01675093337	0,06020248676	0	0	2,579830322	10,54970348	EFNA1;IL33;CXCL10;DBP;SOX18;IRF1;LMO2;BHLHE40;MEOX2
Positive Regulation Of Cell Migration (GO:0030335)	3/272	0,01696796363	0,06020248676	0	0	5,935195418	24,19439801	SEMA6A;CLEC7A;IL1B
T Cell Activation (GO:0042110)	2/111	0,0207569173	0,06440585629	0	0	9,585224529	37,14155384	CLEC7A;RASGRP1
Small GTPase Mediated Signal Transduction (GO:0007264)	2/112	0,02110790784	0,06440585629	0	0	9,497607656	36,64279161	RASGRP1;RASGRP3
Negative Regulation Of Cellular Process (GO:0048523)	4/537	0,02189799114	0,06440585629	0	0	4,049822806	15,4758324	IRF1;IL1B;SOX7;IFIT3
Cellular Response To Cytokine Stimulus (GO:0071345)	3/308	0,0234852528	0,06645962501	0	0	5,225077537	19,60126493	IRF1;IL1B;CCL4
Positive Regulation Of MAPK Cascade (GO:0043410)	3/310	0,02388203862	0,06645962501	0	0	5,190509728	19,38462621	IL1B;CCL4;RASGRP1
Positive Regulation Of Epithelial Cell Proliferation (GO:0050679)	2/123	0,0251304775	0,06645962501	0	0	8,629404089	31,78791084	FGF7;NRARP
Neuron Projection Guidance (GO:0097485)	2/124	0,02551058617	0,06645962501	0	0	8,558239862	31,39728739	EFNA1;SEMA6A
Response To Cytokine (GO:0034097)	2/125	0,02589305255	0,06667738855	0	0	8,488232777	31,01414014	CD274;IL1B
Defense Response To Symbiont (GO:0140546)	2/148	0,03531687254	0,07839647147	0	0	7,142754146	23,88104459	IRF1;IFIT3
Positive Regulation Of NF-kappaB Transcription Factor Activity (GO:0051092)	2/152	0,03707341982	0,08001425774	0	0	6,950877193	22,90213257	CLEC7A;IL1B
Positive Regulation Of Cellular Biosynthetic Process (GO:0031328)	2/174	0,04731209497	0,08843382238	0	0	6,055079559	18,473983	CLEC7A;IL1B
Positive Regulation Of ERK1 And ERK2 Cascade (GO:0070374)	2/179	0,04976890638	0,09009099714	0	0	5,882545346	17,64978234	CCL4;RASGRP1

## Sheet: E
Term	Overlap	P-value	Adjusted P-value	Old P-value	Old Adjusted P-value	Odds Ratio	Combined Score	Genes
Regulation Of Cell Migration (GO:0030334)	2/434	0,009178418987	0,03365420295	0	0	18,11203704	84,9617602	ARHGEF39;SAP30

## Sheet: F
Term	Overlap	P-value	Adjusted P-value	Old P-value	Old Adjusted P-value	Odds Ratio	Combined Score	Genes

## Sheet: G
Term	Overlap	P-value	Adjusted P-value	Old P-value	Old Adjusted P-value	Odds Ratio	Combined Score	Genes
Neuropeptide Signaling Pathway (GO:0007218)	2/68	0,001009514721	0,05028482055	0	0	50,3030303	347,0046664	CPE;GPR83
Small GTPase Mediated Signal Transduction (GO:0007264)	2/112	0,002706669842	0,05028482055	0	0	30,11515152	178,0418671	MRAS;RASGRF1

## Sheet: H
Term	Overlap	P-value	Adjusted P-value	Old P-value	Old Adjusted P-value	Odds Ratio	Combined Score	Genes
Negative Regulation Of Peptidase Activity (GO:0010466)	2/60	9,06E-04	0,04975518797	0	0	52,85676393	370,3269571	SERPINE2;SERPINA5
Negative Regulation Of Signal Transduction (GO:0009968)	2/267	0,01662529369	0,05384480941	0	0	11,44847605	46,90246045	GDF15;NEURL1

## Sheet: I
Term	Overlap	P-value	Adjusted P-value	Old P-value	Old Adjusted P-value	Odds Ratio	Combined Score	Genes
Cholesterol Efflux (GO:0033344)	4/23	2,67E-08	8,55E-06	0	0	175,0263158	3052,160899	APOC1;APOA2;APOA1;TSKU
Negative Regulation Of Lipase Activity (GO:0060192)	3/8	1,37E-07	2,19E-05	0	0	479,208	7573,22714	APOC1;APOA2;ANGPTL4
Phospholipid Efflux (GO:0033700)	3/11	4,02E-07	4,29E-05	0	0	299,46	4409,799149	APOC1;APOA2;APOA1
High-Density Lipoprotein Particle Remodeling (GO:0034375)	3/15	1,11E-06	7,08E-05	0	0	199,6	2737,558502	APOC1;APOA2;APOA1
Negative Regulation Of Lipoprotein Lipase Activity (GO:0051005)	2/5	1,89E-05	8,62E-04	0	0	512,025641	5570,304626	APOC1;ANGPTL4
Secondary Alcohol Metabolic Process (GO:1902652)	3/47	3,82E-05	0,001264587089	0	0	54,34909091	552,827437	APOA2;APOA1;TSKU
Positive Regulation Of CoA-transferase Activity (GO:1905920)	2/7	3,95E-05	0,001264587089	0	0	307,1846154	3114,466645	APOA2;APOA1
Negative Regulation Of Response To Stimulus (GO:0048585)	3/52	5,19E-05	0,001508855169	0	0	48,79102041	481,4126944	AMBP;APOA1;PIM3
High-Density Lipoprotein Particle Assembly (GO:0034380)	2/9	6,76E-05	0,001589888959	0	0	219,3956044	2106,52198	APOA2;APOA1
Regulation Of Phagocytosis (GO:0050764)	3/58	7,20E-05	0,001589888959	0	0	43,45527273	414,506592	AHSG;APOA2;APOA1
Sterol Metabolic Process (GO:0016125)	3/60	7,97E-05	0,001589888959	0	0	41,92631579	395,6623644	APOA2;APOA1;TSKU
Negative Regulation Of Cholesterol Transport (GO:0032375)	2/10	8,45E-05	0,001589888959	0	0	191,9615385	1800,445422	APOC1;APOA2
Positive Regulation Of Endocytosis (GO:0045807)	3/79	1,81E-04	0,002730147695	0	0	31,41473684	270,7083549	AHSG;APOA2;APOA1
Wound Healing (GO:0042060)	3/80	1,88E-04	0,002730147695	0	0	31,00519481	266,0232007	LRG1;EPPK1;TSKU
Regulation Of Lipoprotein Lipase Activity (GO:0051004)	2/15	1,96E-04	0,002730147695	0	0	118,1005917	1008,133383	APOC1;ANGPTL4
Reverse Cholesterol Transport (GO:0043691)	2/16	2,24E-04	0,002987575576	0	0	109,6593407	921,528874	APOA2;APOA1
Phosphatidylcholine Biosynthetic Process (GO:0006656)	2/19	3,18E-04	0,003919622795	0	0	90,29411765	727,0468189	APOA2;APOA1
Acylglycerol Homeostasis (GO:0055090)	2/24	5,12E-04	0,005647467041	0	0	69,75524476	528,575481	APOA1;ANGPTL4
Regulation Of Heterotypic Cell-Cell Adhesion (GO:0034114)	2/24	5,12E-04	0,005647467041	0	0	69,75524476	528,575481	FGG;APOA1
Sterol Transport (GO:0015918)	2/25	5,56E-04	0,005737549367	0	0	66,71906355	500,063177	APOA2;APOA1
Regulation Of Keratinocyte Proliferation (GO:0010837)	2/25	5,56E-04	0,005737549367	0	0	66,71906355	500,063177	LRG1;EPPK1
Organonitrogen Compound Biosynthetic Process (GO:1901566)	3/123	6,65E-04	0,006444268118	0	0	19,852	145,2447289	ALAS1;APOA2;APOA1
Phosphatidylcholine Metabolic Process (GO:0046470)	2/55	0,002680897895	0,02199711093	0	0	28,91001451	171,1936433	APOA2;APOA1
Protein Modification Process (GO:0036211)	5/711	0,002788059335	0,02230447468	0	0	5,932380835	34,89669341	APOA2;APOA1;PIM3;PPP2R3A;SGK1
Regulation Of Endopeptidase Activity (GO:0052548)	2/69	0,004184399851	0,03265873055	0	0	22,85304248	125,1522188	SERPINA1;AHSG
Negative Regulation Of Cellular Component Organization (GO:0051129)	2/79	0,005448174154	0,03962308475	0	0	19,87512488	103,5985864	APOA2;APOA1
Positive Regulation Of Vasculature Development (GO:1904018)	2/104	0,009269300038	0,05293717942	0	0	14,98491704	70,14510712	LRG1;ANGPTL4
Glycerophospholipid Biosynthetic Process (GO:0046474)	2/108	0,009965269141	0,05314810208	0	0	14,41654572	66,44080358	APOA2;APOA1
Positive Regulation Of Multicellular Organismal Process (GO:0051240)	3/387	0,01645866645	0,05558551766	0	0	6,12125	25,13938063	LRG1;FGG;TSKU
Positive Regulation Of Transferase Activity (GO:0051347)	2/143	0,01699200997	0,05605611538	0	0	10,81887616	44,08705068	APOA2;APOA1
Negative Regulation Of Response To External Stimulus (GO:0032102)	2/146	0,01766946139	0,05769620047	0	0	10,59188034	42,74795496	APOA1;EPPK1
Negative Regulation Of Cytokine Production (GO:0001818)	2/178	0,02558510802	0,07126505264	0	0	8,652097902	31,71638302	APOA2;APOA1
Neuron Projection Development (GO:0031175)	2/192	0,02942577521	0,07593748442	0	0	8,008906883	28,23847888	SGK1;TSKU
Protein Stabilization (GO:0050821)	2/208	0,03407927691	0,07760762737	0	0	7,380881255	24,94048338	APOA2;APOA1
Negative Regulation Of Multicellular Organismal Process (GO:0051241)	2/231	0,04123593013	0,08568504961	0	0	6,631844138	21,14527235	APOA2;APOA1
Regulation Of Inflammatory Response (GO:0050727)	2/240	0,04417893044	0,0878090543	0	0	6,378151261	19,89668936	AHSG;APOA1

## Sheet: J
Term	Overlap	P-value	Adjusted P-value	Old P-value	Old Adjusted P-value	Odds Ratio	Combined Score	Genes
Positive Regulation Of Hydrolase Activity (GO:0051345)	2/176	0,01073957228	0,06588720089	0	0	14,22988506	64,51573769	RGS9;CCL17
DNA Metabolic Process (GO:0006259)	2/288	0,02716102153	0,06958827143	0	0	8,608391608	31,04162225	INSL6;NT5E

[truncated: 8 more sheets: K, L, M, N, O, P, DOWN, UP]
